# Supplementary material
Source: publisher figshare collection journal article supplement (https://acs.figshare.com/ndownloader/files/3942367)
Supplement: Supplementary file 1 [file 3942367]

data_c20h22o4_0m
_audit_creation_date              2013-11-20
_audit_creation_method
;
Olex2 1.2
(compiled 2013.11.15 svn.r2834 for OlexSys, GUI svn.r4709)
;
_shelxl_version_number            2013-4
_publ_contact_author_address      ?
_publ_contact_author_email        ?
_publ_contact_author_name         ''
_publ_contact_author_phone        ?
_publ_section_references
;
Dolomanov, O.V., Bourhis, L.J., Gildea, R.J, Howard, J.A.K. & Puschmann, H.
 (2009), J. Appl. Cryst. 42, 339-341.

Sheldrick, G.M. (2008). Acta Cryst. A64, 112-122
Sheldrick, G.M. (2008). Acta Cryst. A64, 112-122
;
_chemical_name_common             ?
_chemical_name_systematic
;
 ?
;
_chemical_formula_moiety          'C20 H22 O4'
_chemical_formula_sum             'C20 H22 O4'
_chemical_formula_weight          326.37
_chemical_absolute_configuration  ?
_chemical_melting_point           ?
loop_
  _atom_type_symbol
  _atom_type_description
  _atom_type_scat_dispersion_real
  _atom_type_scat_dispersion_imag
  _atom_type_scat_source
 'C' 'C' 0.0015 0.0009 'International Tables Vol C Tables 4.2.6.8 and 6.1.1.4'
 'H' 'H' 0.0000 0.0000 'International Tables Vol C Tables 4.2.6.8 and 6.1.1.4'
 'O' 'O' 0.0056 0.0036 'International Tables Vol C Tables 4.2.6.8 and 6.1.1.4'

_shelx_space_group_comment
;
The symmetry employed for this shelxl refinement is uniquely defined
by the following loop, which should always be used as a source of
symmetry information in preference to the above space-group names.
They are only intended as comments.
;
_space_group_crystal_system       'orthorhombic'
_space_group_IT_number            19
_space_group_name_H-M_alt         'P 21 21 21'
_space_group_name_Hall            'P 2ac 2ab'
loop_
  _space_group_symop_operation_xyz
 'x, y, z'
 '-x+1/2, -y, z+1/2'
 '-x, y+1/2, -z+1/2'
 'x+1/2, -y+1/2, -z'

_cell_length_a                    6.2585(3)
_cell_length_b                    15.9680(7)
_cell_length_c                    17.0842(8)
_cell_angle_alpha                 90
_cell_angle_beta                  90
_cell_angle_gamma                 90
_cell_volume                      1707.32(14)
_cell_formula_units_Z             4
_cell_measurement_reflns_used     6032
_cell_measurement_temperature     296(2)
_cell_measurement_theta_max       20.90
_cell_measurement_theta_min       2.74
_shelx_estimated_absorpt_T_max    ?
_shelx_estimated_absorpt_T_min    ?
_exptl_absorpt_coefficient_mu     0.055
_exptl_absorpt_correction_T_max   0.7446
_exptl_absorpt_correction_T_min   0.6595
_exptl_absorpt_correction_type    multi-scan
_exptl_absorpt_process_details
;
SADABS-2012/1 (Bruker,2012) was used for absorption correction.
wR2(int) was 0.0723 before and 0.0520 after correction.
The Ratio of minimum to maximum transmission is 0.8857.
The \l/2 correction factor is 0.0015.
;
_exptl_crystal_colour             ?
_exptl_crystal_density_diffrn     1.270
_exptl_crystal_density_meas       ?
_exptl_crystal_density_method     ?
_exptl_crystal_description        ?
_exptl_crystal_F_000              696
_exptl_crystal_size_max           ?
_exptl_crystal_size_mid           ?
_exptl_crystal_size_min           ?
_exptl_special_details
;
 ?
;
_exptl_transmission_factor_max    ?
_exptl_transmission_factor_min    ?
_diffrn_reflns_av_R_equivalents   0.0377
_diffrn_reflns_av_unetI/netI      0.0344
_diffrn_reflns_Laue_measured_fraction_full 0.997
_diffrn_reflns_Laue_measured_fraction_max 0.996
_diffrn_reflns_limit_h_max        8
_diffrn_reflns_limit_h_min        -8
_diffrn_reflns_limit_k_max        20
_diffrn_reflns_limit_k_min        -18
_diffrn_reflns_limit_l_max        18
_diffrn_reflns_limit_l_min        -21
_diffrn_reflns_number             16203
_diffrn_reflns_point_group_measured_fraction_full 0.998
_diffrn_reflns_point_group_measured_fraction_max 0.996
_diffrn_reflns_theta_full         19.665
_diffrn_reflns_theta_max          21.074
_diffrn_reflns_theta_min          1.377
_diffrn_ambient_temperature       296.15
_diffrn_detector_area_resol_mean  ?
_diffrn_measured_fraction_theta_full 0.997
_diffrn_measured_fraction_theta_max 0.996
_diffrn_measurement_device_type   'Bruker APEX-II CCD'
_diffrn_measurement_method        '\f and \w scans'
_diffrn_radiation_type            AgK\a
_diffrn_radiation_wavelength      0.56086
_diffrn_source                    ?
_diffrn_standards_number          0
_reflns_Friedel_coverage          0.727
_reflns_Friedel_fraction_full     1.000
_reflns_Friedel_fraction_max      0.996
_reflns_number_gt                 3337
_reflns_number_total              3726
_reflns_special_details
;
 Reflections were merged by SHELXL according to the crystal
 class for the calculation of statistics and refinement.
 
 _reflns_Friedel_fraction is defined as the number of unique
 Friedel pairs measured divided by the number that would be
 possible theoretically, ignoring centric projections and
 systematic absences.
;
_reflns_threshold_expression      'I > 2\s(I)'
_computing_cell_refinement        ?
_computing_data_collection        ?
_computing_data_reduction         ?
_computing_molecular_graphics     'Olex2 (Dolomanov et al., 2009)'
_computing_publication_material   'Olex2 (Dolomanov et al., 2009)'
_computing_structure_refinement   'ShelXL (Sheldrick, 2008)'
_computing_structure_solution     'ShelXS (Sheldrick, 2008)'
_refine_diff_density_max          0.187
_refine_diff_density_min          -0.203
_refine_diff_density_rms          0.048
_refine_ls_abs_structure_details
;
 Flack x determined using 1300 quotients [(I+)-(I-)]/[(I+)+(I-)]
 (Parsons and Flack (2004), Acta Cryst. A60, s61).
;
_refine_ls_abs_structure_Flack    0.7(7)
_refine_ls_extinction_coef        .
_refine_ls_extinction_method      none
_refine_ls_goodness_of_fit_ref    1.075
_refine_ls_hydrogen_treatment     mixed
_refine_ls_matrix_type            full
_refine_ls_number_parameters      223
_refine_ls_number_reflns          3726
_refine_ls_number_restraints      0
_refine_ls_R_factor_all           0.0442
_refine_ls_R_factor_gt            0.0380
_refine_ls_restrained_S_all       1.075
_refine_ls_shift/su_max           0.001
_refine_ls_shift/su_mean          0.000
_refine_ls_structure_factor_coef  Fsqd
_refine_ls_weighting_details
'w=1/[\s^2^(Fo^2^)+(0.0448P)^2^+0.3367P] where P=(Fo^2^+2Fc^2^)/3'
_refine_ls_weighting_scheme       calc
_refine_ls_wR_factor_gt           0.0886
_refine_ls_wR_factor_ref          0.0924
_refine_special_details
;
 ?
;
_olex2_refinement_description
;
1. Fixed Uiso
 At 1.2 times of:
  All C(H) groups, All C(H,H) groups
 At 1.5 times of:
  All C(H,H,H) groups, All O(H) groups
2.a Ternary CH refined with riding coordinates:
 C6(H6), C8(H8), C17(H17), C18(H18)
2.b Secondary CH2 refined with riding coordinates:
 C11(H11A,H11B), C23(H23A,H23B)
2.c Aromatic/amide H refined with riding coordinates:
 C7(H7), C9(H9), C12(H12), C13(H13), C15(H15), C16(H16), C20(H20), C21(H21),
 C22(H22)
2.d Idealised Me refined as rotating group:
 C14(H14A,H14B,H14C)
2.e Idealised tetrahedral OH refined as rotating group:
 O2(H2)
;
_atom_sites_solution_hydrogens    mixed
_atom_sites_solution_primary      direct
_atom_sites_solution_secondary    ?
loop_
  _atom_site_label
  _atom_site_type_symbol
  _atom_site_fract_x
  _atom_site_fract_y
  _atom_site_fract_z
  _atom_site_U_iso_or_equiv
  _atom_site_adp_type
  _atom_site_occupancy
  _atom_site_site_symmetry_order
  _atom_site_calc_flag
  _atom_site_refinement_flags_posn
  _atom_site_refinement_flags_adp
  _atom_site_refinement_flags_occupancy
  _atom_site_disorder_assembly
  _atom_site_disorder_group
 O1 O 0.3447(3) 0.30974(9) 0.47948(8) 0.0172(3) Uani 1 1 d . . . . .
 O2 O 0.3218(3) 0.18166(9) 0.65393(9) 0.0212(4) Uani 1 1 d . . . . .
 H2 H 0.4044 0.1420 0.6501 0.032 Uiso 1 1 calc GR . . . .
 O3 O 0.3426(2) 0.17345(9) 0.49241(9) 0.0195(3) Uani 1 1 d . . . . .
 O4 O 0.1270(3) 0.44709(11) 0.35976(10) 0.0269(4) Uani 1 1 d . . . . .
 C5 C 0.3569(3) 0.24083(13) 0.52423(12) 0.0153(4) Uani 1 1 d . . . . .
 C6 C 0.3107(3) 0.33184(13) 0.64501(12) 0.0138(4) Uani 1 1 d . . . . .
 H6 H 0.1547 0.3295 0.6405 0.017 Uiso 1 1 calc R . . . .
 C7 C 0.1169(4) 0.50724(13) 0.64724(12) 0.0156(4) Uani 1 1 d . . . . .
 H7 H 0.0132 0.4658 0.6426 0.019 Uiso 1 1 calc R . . . .
 C8 C 0.3931(4) 0.40479(13) 0.59399(12) 0.0138(4) Uani 1 1 d . . . . .
 H8 H 0.5495 0.4024 0.5933 0.017 Uiso 1 1 calc R . . . .
 C9 C 0.5754(4) 0.36190(14) 0.75459(13) 0.0190(5) Uani 1 1 d . . . . .
 H9 H 0.6803 0.3713 0.7171 0.023 Uiso 1 1 calc R . . . .
 C10 C 0.3269(4) 0.49041(12) 0.62523(11) 0.0142(4) Uani 1 1 d . . . . .
 C11 C 0.3546(4) 0.43891(14) 0.36809(13) 0.0233(5) Uani 1 1 d . . . . .
 H11A H 0.4248 0.4794 0.3345 0.028 Uiso 1 1 calc R . . . .
 H11B H 0.3977 0.3834 0.3513 0.028 Uiso 1 1 calc R . . . .
 C12 C 0.4784(4) 0.55371(14) 0.63201(13) 0.0196(5) Uani 1 1 d . . . . .
 H12 H 0.6187 0.5434 0.6168 0.024 Uiso 1 1 calc R . . . .
 C13 C 0.6269(4) 0.36865(14) 0.83375(13) 0.0219(5) Uani 1 1 d . . . . .
 H13 H 0.7653 0.3832 0.8481 0.026 Uiso 1 1 calc R . . . .
 C14 C 0.5317(5) 0.36107(19) 0.97708(15) 0.0387(7) Uani 1 1 d . . . . .
 H14A H 0.6425 0.3216 0.9894 0.058 Uiso 1 1 calc GR . . . .
 H14B H 0.4079 0.3493 1.0083 0.058 Uiso 1 1 calc GR . . . .
 H14C H 0.5811 0.4168 0.9879 0.058 Uiso 1 1 calc GR . . . .
 C15 C 0.0614(4) 0.58591(14) 0.67623(13) 0.0195(5) Uani 1 1 d . . . . .
 H15 H -0.0790 0.5967 0.6909 0.023 Uiso 1 1 calc R . . . .
 C16 C 0.2165(4) 0.32769(14) 0.78871(13) 0.0181(5) Uani 1 1 d . . . . .
 H16 H 0.0773 0.3144 0.7743 0.022 Uiso 1 1 calc R . . . .
 C17 C 0.4034(4) 0.25070(13) 0.61168(12) 0.0149(4) Uani 1 1 d . . . . .
 H17 H 0.5587 0.2520 0.6188 0.018 Uiso 1 1 calc R . . . .
 C18 C 0.3133(4) 0.39479(13) 0.50985(12) 0.0154(5) Uani 1 1 d . . . . .
 H18 H 0.1602 0.4074 0.5088 0.018 Uiso 1 1 calc R . . . .
 C19 C 0.3686(4) 0.34116(12) 0.73089(12) 0.0141(4) Uani 1 1 d . . . . .
 C20 C 0.2144(4) 0.64802(14) 0.68331(13) 0.0227(5) Uani 1 1 d . . . . .
 H20 H 0.1768 0.7003 0.7029 0.027 Uiso 1 1 calc R . . . .
 C21 C 0.4238(4) 0.63229(14) 0.66111(14) 0.0235(5) Uani 1 1 d . . . . .
 H21 H 0.5270 0.6739 0.6656 0.028 Uiso 1 1 calc R . . . .
 C22 C 0.2682(4) 0.33369(14) 0.86780(13) 0.0228(5) Uani 1 1 d . . . . .
 H22 H 0.1632 0.3241 0.9053 0.027 Uiso 1 1 calc R . . . .
 C23 C 0.4260(4) 0.45260(14) 0.45202(13) 0.0200(5) Uani 1 1 d . . . . .
 H23A H 0.3981 0.5103 0.4666 0.024 Uiso 1 1 calc R . . . .
 H23B H 0.5789 0.4434 0.4554 0.024 Uiso 1 1 calc R . . . .
 C24 C 0.4749(4) 0.35392(15) 0.89164(13) 0.0238(6) Uani 1 1 d . . . . .
 H4 H 0.100(6) 0.494(2) 0.345(2) 0.054(11) Uiso 1 1 d . . . . .

loop_
  _atom_site_aniso_label
  _atom_site_aniso_U_11
  _atom_site_aniso_U_22
  _atom_site_aniso_U_33
  _atom_site_aniso_U_23
  _atom_site_aniso_U_13
  _atom_site_aniso_U_12
 O1 0.0228(9) 0.0157(8) 0.0132(7) -0.0028(6) -0.0009(7) 0.0001(6)
 O2 0.0282(9) 0.0128(7) 0.0227(8) 0.0026(6) 0.0027(7) 0.0007(7)
 O3 0.0191(8) 0.0169(8) 0.0226(8) -0.0063(6) -0.0046(7) 0.0019(7)
 O4 0.0371(11) 0.0171(8) 0.0264(9) 0.0048(7) -0.0123(8) -0.0012(8)
 C5 0.0108(10) 0.0164(10) 0.0187(10) -0.0017(9) 0.0002(9) -0.0002(9)
 C6 0.0133(10) 0.0140(9) 0.0140(9) -0.0001(8) 0.0005(9) -0.0002(8)
 C7 0.0170(11) 0.0163(10) 0.0134(10) 0.0003(8) -0.0018(9) -0.0004(9)
 C8 0.0139(11) 0.0148(10) 0.0126(10) 0.0003(8) -0.0001(9) -0.0009(8)
 C9 0.0188(12) 0.0212(11) 0.0171(10) -0.0003(9) 0.0028(9) 0.0004(9)
 C10 0.0203(12) 0.0137(10) 0.0086(9) 0.0017(8) -0.0014(9) 0.0001(8)
 C11 0.0342(15) 0.0193(11) 0.0165(11) 0.0024(9) -0.0018(11) 0.0002(10)
 C12 0.0181(12) 0.0205(11) 0.0202(11) -0.0007(9) -0.0007(10) -0.0019(9)
 C13 0.0230(13) 0.0220(11) 0.0206(11) -0.0037(9) -0.0043(10) 0.0040(10)
 C14 0.054(2) 0.0476(17) 0.0146(12) -0.0033(12) -0.0036(13) 0.0130(15)
 C15 0.0222(13) 0.0214(11) 0.0149(10) -0.0005(9) -0.0024(9) 0.0061(9)
 C16 0.0191(12) 0.0151(10) 0.0202(11) 0.0015(9) 0.0044(9) 0.0022(9)
 C17 0.0163(11) 0.0122(10) 0.0161(10) 0.0004(8) -0.0005(8) -0.0004(9)
 C18 0.0189(12) 0.0116(10) 0.0157(10) -0.0023(8) -0.0003(9) 0.0004(8)
 C19 0.0186(11) 0.0094(9) 0.0143(10) 0.0001(8) -0.0001(9) 0.0033(8)
 C20 0.0331(14) 0.0141(11) 0.0208(11) -0.0028(9) -0.0037(11) 0.0060(10)
 C21 0.0271(14) 0.0154(11) 0.0278(13) -0.0025(9) -0.0049(10) -0.0054(9)
 C22 0.0288(13) 0.0207(11) 0.0189(11) 0.0027(9) 0.0087(10) 0.0058(10)
 C23 0.0265(13) 0.0166(11) 0.0167(11) 0.0012(9) 0.0014(10) -0.0025(9)
 C24 0.0361(15) 0.0204(12) 0.0149(11) -0.0015(9) -0.0009(11) 0.0095(10)

_geom_special_details
;
 All esds (except the esd in the dihedral angle between two l.s. planes)
 are estimated using the full covariance matrix.  The cell esds are taken
 into account individually in the estimation of esds in distances, angles
 and torsion angles; correlations between esds in cell parameters are only
 used when they are defined by crystal symmetry.  An approximate (isotropic)
 treatment of cell esds is used for estimating esds involving l.s. planes.
;
loop_
  _geom_bond_atom_site_label_1
  _geom_bond_atom_site_label_2
  _geom_bond_distance
  _geom_bond_site_symmetry_2
  _geom_bond_publ_flag
 O1 C5 1.342(3) . ?
 O1 C18 1.467(2) . ?
 O2 C17 1.413(3) . ?
 O3 C5 1.209(3) . ?
 O4 C11 1.437(3) . ?
 C5 C17 1.530(3) . ?
 C6 C8 1.544(3) . ?
 C6 C17 1.529(3) . ?
 C6 C19 1.519(3) . ?
 C7 C10 1.393(3) . ?
 C7 C15 1.394(3) . ?
 C8 C10 1.525(3) . ?
 C8 C18 1.530(3) . ?
 C9 C13 1.395(3) . ?
 C9 C19 1.396(3) . ?
 C10 C12 1.391(3) . ?
 C11 C23 1.518(3) . ?
 C12 C21 1.392(3) . ?
 C13 C24 1.392(4) . ?
 C14 C24 1.507(3) . ?
 C15 C20 1.384(3) . ?
 C16 C19 1.389(3) . ?
 C16 C22 1.393(3) . ?
 C18 C23 1.525(3) . ?
 C20 C21 1.388(4) . ?
 C22 C24 1.394(4) . ?

loop_
  _geom_angle_atom_site_label_1
  _geom_angle_atom_site_label_2
  _geom_angle_atom_site_label_3
  _geom_angle
  _geom_angle_site_symmetry_1
  _geom_angle_site_symmetry_3
  _geom_angle_publ_flag
 C5 O1 C18 124.40(16) . . ?
 O1 C5 C17 118.86(18) . . ?
 O3 C5 O1 117.99(19) . . ?
 O3 C5 C17 123.02(19) . . ?
 C17 C6 C8 107.61(16) . . ?
 C19 C6 C8 113.07(17) . . ?
 C19 C6 C17 110.61(17) . . ?
 C10 C7 C15 120.3(2) . . ?
 C10 C8 C6 112.85(17) . . ?
 C10 C8 C18 109.50(17) . . ?
 C18 C8 C6 110.04(17) . . ?
 C13 C9 C19 120.9(2) . . ?
 C7 C10 C8 121.57(19) . . ?
 C12 C10 C7 118.71(19) . . ?
 C12 C10 C8 119.7(2) . . ?
 O4 C11 C23 111.9(2) . . ?
 C10 C12 C21 121.2(2) . . ?
 C24 C13 C9 121.2(2) . . ?
 C20 C15 C7 120.3(2) . . ?
 C19 C16 C22 121.3(2) . . ?
 O2 C17 C5 110.46(17) . . ?
 O2 C17 C6 109.49(17) . . ?
 C6 C17 C5 112.24(17) . . ?
 O1 C18 C8 112.67(17) . . ?
 O1 C18 C23 105.62(17) . . ?
 C23 C18 C8 113.25(18) . . ?
 C9 C19 C6 121.65(19) . . ?
 C16 C19 C6 120.6(2) . . ?
 C16 C19 C9 117.8(2) . . ?
 C15 C20 C21 120.0(2) . . ?
 C20 C21 C12 119.5(2) . . ?
 C16 C22 C24 121.0(2) . . ?
 C11 C23 C18 112.88(19) . . ?
 C13 C24 C14 120.9(2) . . ?
 C13 C24 C22 117.8(2) . . ?
 C22 C24 C14 121.3(2) . . ?

loop_
  _geom_torsion_atom_site_label_1
  _geom_torsion_atom_site_label_2
  _geom_torsion_atom_site_label_3
  _geom_torsion_atom_site_label_4
  _geom_torsion
  _geom_torsion_site_symmetry_1
  _geom_torsion_site_symmetry_2
  _geom_torsion_site_symmetry_3
  _geom_torsion_site_symmetry_4
  _geom_torsion_publ_flag
 O1 C5 C17 O2 154.61(19) . . . . ?
 O1 C5 C17 C6 32.1(3) . . . . ?
 O1 C18 C23 C11 53.1(2) . . . . ?
 O3 C5 C17 O2 -29.8(3) . . . . ?
 O3 C5 C17 C6 -152.3(2) . . . . ?
 O4 C11 C23 C18 55.6(2) . . . . ?
 C5 O1 C18 C8 25.7(3) . . . . ?
 C5 O1 C18 C23 149.8(2) . . . . ?
 C6 C8 C10 C7 -48.0(3) . . . . ?
 C6 C8 C10 C12 132.1(2) . . . . ?
 C6 C8 C18 O1 -47.4(2) . . . . ?
 C6 C8 C18 C23 -167.25(18) . . . . ?
 C7 C10 C12 C21 0.8(3) . . . . ?
 C7 C15 C20 C21 0.3(3) . . . . ?
 C8 C6 C17 O2 -176.57(17) . . . . ?
 C8 C6 C17 C5 -53.5(2) . . . . ?
 C8 C6 C19 C9 -47.3(3) . . . . ?
 C8 C6 C19 C16 133.8(2) . . . . ?
 C8 C10 C12 C21 -179.3(2) . . . . ?
 C8 C18 C23 C11 176.85(19) . . . . ?
 C9 C13 C24 C14 179.8(2) . . . . ?
 C9 C13 C24 C22 -1.2(3) . . . . ?
 C10 C7 C15 C20 0.1(3) . . . . ?
 C10 C8 C18 O1 -172.04(18) . . . . ?
 C10 C8 C18 C23 68.2(2) . . . . ?
 C10 C12 C21 C20 -0.4(3) . . . . ?
 C13 C9 C19 C6 -178.77(19) . . . . ?
 C13 C9 C19 C16 0.1(3) . . . . ?
 C15 C7 C10 C8 179.46(19) . . . . ?
 C15 C7 C10 C12 -0.7(3) . . . . ?
 C15 C20 C21 C12 -0.2(3) . . . . ?
 C16 C22 C24 C13 0.6(3) . . . . ?
 C16 C22 C24 C14 179.6(2) . . . . ?
 C17 C6 C8 C10 -175.19(18) . . . . ?
 C17 C6 C8 C18 62.2(2) . . . . ?
 C17 C6 C19 C9 73.4(2) . . . . ?
 C17 C6 C19 C16 -105.4(2) . . . . ?
 C18 O1 C5 O3 166.33(19) . . . . ?
 C18 O1 C5 C17 -17.8(3) . . . . ?
 C18 C8 C10 C7 74.9(2) . . . . ?
 C18 C8 C10 C12 -104.9(2) . . . . ?
 C19 C6 C8 C10 -52.7(2) . . . . ?
 C19 C6 C8 C18 -175.38(18) . . . . ?
 C19 C6 C17 O2 59.5(2) . . . . ?
 C19 C6 C17 C5 -177.48(17) . . . . ?
 C19 C9 C13 C24 0.8(3) . . . . ?
 C19 C16 C22 C24 0.3(3) . . . . ?
 C22 C16 C19 C6 178.21(19) . . . . ?
 C22 C16 C19 C9 -0.7(3) . . . . ?

_shelx_res_file
;
TITL C20H22O4_0m in P2(1)2(1)2(1)
CELL 0.56086 6.2585 15.968 17.0842 90 90 90
ZERR 4 0.0003 0.0007 0.0008 0 0 0
LATT -1
SYMM 0.5-X,-Y,0.5+Z
SYMM -X,0.5+Y,0.5-Z
SYMM 0.5+X,0.5-Y,-Z
 
SFAC C H O
UNIT 80 88 16
 
L.S. 4 0 0
PLAN  20
TEMP 23
BOND
MORE -1
fmap 2 53
ACTA
CONF
REM <HKL>E:/frames/guest/Xtal_service/2013_11_18/work/C20H22O4_0m.hkl</HKL>
 
WGHT    0.044800    0.336700
FVAR       0.21328
O1    3    0.344725    0.309740    0.479475    11.00000    0.02278    0.01566 =
         0.01321   -0.00282   -0.00092    0.00011
O2    3    0.321782    0.181656    0.653933    11.00000    0.02817    0.01275 =
         0.02273    0.00257    0.00273    0.00067
AFIX 147
H2    2    0.404419    0.142018    0.650092    11.00000   -1.50000
AFIX   0
O3    3    0.342556    0.173453    0.492408    11.00000    0.01906    0.01687 =
         0.02261   -0.00626   -0.00463    0.00191
O4    3    0.127014    0.447095    0.359762    11.00000    0.03711    0.01706 =
         0.02639    0.00483   -0.01226   -0.00122
C5    1    0.356889    0.240834    0.524232    11.00000    0.01076    0.01637 =
         0.01874   -0.00165    0.00019   -0.00016
C6    1    0.310710    0.331838    0.645006    11.00000    0.01329    0.01403 =
         0.01404   -0.00007    0.00055   -0.00021
AFIX  13
H6    2    0.154712    0.329534    0.640524    11.00000   -1.20000
AFIX   0
C7    1    0.116885    0.507241    0.647241    11.00000    0.01702    0.01631 =
         0.01343    0.00026   -0.00178   -0.00044
AFIX  43
H7    2    0.013220    0.465813    0.642575    11.00000   -1.20000
AFIX   0
C8    1    0.393088    0.404793    0.593987    11.00000    0.01386    0.01481 =
         0.01262    0.00028   -0.00009   -0.00091
AFIX  13
H8    2    0.549543    0.402379    0.593309    11.00000   -1.20000
AFIX   0
C9    1    0.575410    0.361897    0.754589    11.00000    0.01878    0.02115 =
         0.01712   -0.00033    0.00280    0.00042
AFIX  43
H9    2    0.680309    0.371347    0.717058    11.00000   -1.20000
AFIX   0
C10   1    0.326926    0.490407    0.625226    11.00000    0.02031    0.01369 =
         0.00856    0.00172   -0.00137    0.00010
C11   1    0.354571    0.438909    0.368088    11.00000    0.03418    0.01928 =
         0.01651    0.00236   -0.00179    0.00022
AFIX  23
H11A  2    0.424773    0.479418    0.334492    11.00000   -1.20000
H11B  2    0.397718    0.383411    0.351260    11.00000   -1.20000
AFIX   0
C12   1    0.478407    0.553715    0.632011    11.00000    0.01815    0.02045 =
         0.02018   -0.00074   -0.00069   -0.00194
AFIX  43
H12   2    0.618657    0.543372    0.616841    11.00000   -1.20000
AFIX   0
C13   1    0.626899    0.368648    0.833755    11.00000    0.02302    0.02197 =
         0.02065   -0.00370   -0.00435    0.00397
AFIX  43
H13   2    0.765284    0.383250    0.848145    11.00000   -1.20000
AFIX   0
C14   1    0.531741    0.361069    0.977082    11.00000    0.05377    0.04761 =
         0.01464   -0.00331   -0.00358    0.01304
AFIX 137
H14A  2    0.642550    0.321641    0.989400    11.00000   -1.50000
H14B  2    0.407851    0.349318    1.008342    11.00000   -1.50000
H14C  2    0.581054    0.416799    0.987940    11.00000   -1.50000
AFIX   0
C15   1    0.061445    0.585906    0.676230    11.00000    0.02221    0.02141 =
         0.01495   -0.00048   -0.00238    0.00610
AFIX  43
H15   2   -0.079002    0.596685    0.690882    11.00000   -1.20000
AFIX   0
C16   1    0.216493    0.327685    0.788714    11.00000    0.01914    0.01506 =
         0.02015    0.00147    0.00443    0.00222
AFIX  43
H16   2    0.077257    0.314382    0.774325    11.00000   -1.20000
AFIX   0
C17   1    0.403395    0.250701    0.611684    11.00000    0.01634    0.01223 =
         0.01611    0.00043   -0.00046   -0.00043
AFIX  13
H17   2    0.558738    0.252018    0.618796    11.00000   -1.20000
AFIX   0
C18   1    0.313347    0.394786    0.509853    11.00000    0.01894    0.01159 =
         0.01567   -0.00229   -0.00031    0.00042
AFIX  13
H18   2    0.160155    0.407444    0.508775    11.00000   -1.20000
AFIX   0
C19   1    0.368632    0.341156    0.730891    11.00000    0.01865    0.00943 =
         0.01433    0.00008   -0.00009    0.00332
C20   1    0.214366    0.648018    0.683308    11.00000    0.03309    0.01414 =
         0.02082   -0.00278   -0.00374    0.00600
AFIX  43
H20   2    0.176772    0.700302    0.702942    11.00000   -1.20000
AFIX   0
C21   1    0.423843    0.632293    0.661107    11.00000    0.02712    0.01545 =
         0.02781   -0.00252   -0.00492   -0.00543
AFIX  43
H21   2    0.527002    0.673933    0.665631    11.00000   -1.20000
AFIX   0
C22   1    0.268168    0.333690    0.867801    11.00000    0.02879    0.02074 =
         0.01894    0.00274    0.00867    0.00583
AFIX  43
H22   2    0.163222    0.324060    0.905275    11.00000   -1.20000
AFIX   0
C23   1    0.425982    0.452599    0.452025    11.00000    0.02650    0.01663 =
         0.01673    0.00120    0.00145   -0.00252
AFIX  23
H23A  2    0.398070    0.510291    0.466568    11.00000   -1.20000
H23B  2    0.578912    0.443433    0.455447    11.00000   -1.20000
AFIX   0
C24   1    0.474871    0.353922    0.891644    11.00000    0.03612    0.02045 =
         0.01490   -0.00151   -0.00094    0.00947
H4    2    0.099765    0.493869    0.344627    11.00000    0.05443
HKLF 4
 
REM  C20H22O4_0m in P2(1)2(1)2(1)
REM R1 =  0.0380 for    3337 Fo > 4sig(Fo)  and  0.0442 for all    3726 data
REM    223 parameters refined using      0 restraints
 
END  
     
WGHT      0.0447      0.3386 

REM Highest difference peak  0.187,  deepest hole -0.203,  1-sigma level  0.048
Q1    1   0.5107  0.3432  0.9320  11.00000  0.05    0.19
Q2    1   0.3452  0.4027  0.5554  11.00000  0.05    0.18
Q3    1   0.7821  0.3779  0.9821  11.00000  0.05    0.17
Q4    1   0.3614  0.4201  0.4778  11.00000  0.05    0.17
Q5    1   0.4804  0.3268  0.7409  11.00000  0.05    0.17
Q6    1   0.3571  0.7417  0.6178  11.00000  0.05    0.17
Q7    1   0.3397  0.3758  0.6212  11.00000  0.05    0.16
Q8    1   0.7498  0.3682  0.9992  11.00000  0.05    0.15
Q9    1   0.1109  0.7560  0.6235  11.00000  0.05    0.15
Q10   1   0.3567  0.4572  0.4187  11.00000  0.05    0.15
Q11   1   0.2097  0.5020  0.6201  11.00000  0.05    0.15
Q12   1   0.5210  0.6426  0.5742  11.00000  0.05    0.14
Q13   1   0.4015  0.3242  0.8803  11.00000  0.05    0.14
Q14   1   0.3834  0.4349  1.0198  11.00000  0.05    0.14
Q15   1   0.4845  0.3049  0.9995  11.00000  0.05    0.14
Q16   1   0.4558  0.6978  0.5824  11.00000  0.05    0.14
Q17   1   0.4806  0.3840  1.0061  11.00000  0.05    0.14
Q18   1   0.1678  0.7456  0.6927  11.00000  0.05    0.14
Q19   1   0.6947  0.2462  0.9825  11.00000  0.05    0.14
Q20   1   0.1462  0.6209  0.6604  11.00000  0.05    0.14

REM The information below was added by Olex2.
REM
REM R1 = 0.0380 for 3337 Fo > 4sig(Fo) and 0.0442 for all 16272 data
REM n/a parameters refined using n/a restraints
REM Highest difference peak 0.19, deepest hole -0.20
REM Mean Shift 0, Max Shift 0.

REM +++ Tabular Listing of Refinement Information +++
REM R1_all = 0.0442
REM R1_gt = 0.0380
REM wR_ref = 0.0924
REM GOOF = 1.075
REM Shift_max = 0
REM Shift_mean = 0
REM Reflections_all = 16272
REM Reflections_gt = 3337
REM Parameters = n/a
REM Hole = -0.20
REM Peak = 0.19
REM Flack = 0.8(10)

;
loop_
  _refln_index_h
  _refln_index_k
  _refln_index_l
  _refln_F_squared_meas
  _refln_F_squared_sigma
 1 0 0 -0.04 0.08
 -1 0 0 -0.06 0.09
 -1 0 0 0.05 0.09
 1 0 0 -0.01 0.1
 -2 0 0 9.35 0.53
 2 0 0 8.94 0.59
 2 0 0 9.11 0.53
 -2 0 0 8.46 0.59
 -3 0 0 -0.05 0.22
 3 0 0 -0.12 0.15
 3 0 0 0.02 0.24
 -3 0 0 -0.05 0.18
 4 0 0 207.71 6.13
 4 0 0 214.06 6
 -4 0 0 206.9 5.99
 -4 0 0 218.77 6.25
 5 0 0 0.17 0.22
 5 0 0 -0.13 0.23
 -5 0 0 -0.23 0.23
 6 0 0 6.9 0.94
 6 0 0 8.64 0.96
 -6 0 0 9.27 1.02
 7 0 0 0.41 0.36
 -7 0 0 0.43 0.36
 8 0 0 -0.07 0.4
 -8 0 0 -0.64 0.27
 0 1 0 -0.02 0.01
 0 1 0 -0.02 0.02
 0 -1 0 -0.03 0.01
 0 1 0 -0.03 0.01
 0 -1 0 -0.03 0.02
 0 -1 0 -0.04 0.01
 -1 1 0 831.49 21.67
 1 1 0 820.26 21.94
 1 1 0 819.93 21.59
 1 -1 0 795.99 21.45
 -1 -1 0 836.79 22.02
 -1 1 0 833.04 21.77
 1 -1 0 820.65 21.81
 -1 -1 0 817.96 21.65
 -2 1 0 438.66 11.42
 -2 -1 0 448.21 11.55
 2 1 0 428.83 11.52
 -2 -1 0 435.13 11.41
 2 -1 0 457.13 11.99
 2 -1 0 442.24 11.51
 2 1 0 455.09 11.95
 -3 -1 0 61.62 2.18
 -3 1 0 62.37 2.05
 3 -1 0 59.98 2.11
 3 -1 0 67.78 2.09
 3 1 0 60.2 2.14
 3 1 0 64.41 2.06
 -3 -1 0 62.59 2.06
 -3 1 0 60.11 2.17
 4 -1 0 105.95 3.39
 -4 1 0 99.48 3.24
 -4 1 0 103.54 3.47
 -4 -1 0 105.14 3.46
 4 -1 0 105.14 3.27
 -4 -1 0 100.13 3.25
 4 1 0 103.72 3.4
 4 1 0 106.04 3.27
 -5 -1 0 0.88 0.36
 5 1 0 0.46 0.35
 5 -1 0 0.87 0.36
 5 1 0 0.7 0.32
 -5 1 0 0.52 0.35
 5 -1 0 0.21 0.25
 -6 1 0 2.77 0.61
 6 1 0 2.19 0.57
 6 -1 0 3.44 0.62
 6 1 0 1.98 0.52
 -6 -1 0 2.61 0.57
 6 -1 0 2.73 0.6
 -7 -1 0 0.28 0.37
 7 1 0 0.46 0.41
 -7 1 0 0.29 0.36
 7 -1 0 0.09 0.35
 -8 -1 0 2.76 0.66
 0 -2 0 18.09 0.56
 0 -2 0 18.31 0.56
 0 2 0 17.54 0.56
 0 2 0 18.43 0.55
 0 2 0 18.2 0.55
 1 2 0 422.39 11.42
 -1 2 0 435.76 11.21
 -1 2 0 399.95 10.8
 -1 -2 0 409.51 11.02
 -1 -2 0 433.8 11.26
 1 -2 0 416.97 11.24
 1 2 0 396.17 10.96
 2 2 0 133.32 3.74
 -2 2 0 135.26 3.74
 -2 -2 0 133.5 3.74
 2 2 0 132.91 3.63
 -2 -2 0 128.93 3.62
 2 -2 0 134.76 3.64
 -2 2 0 126.59 3.63
 2 -2 0 124.99 3.67
 3 2 0 8.55 0.64
 3 2 0 7.36 0.54
 3 -2 0 8.18 0.57
 -3 -2 0 8.88 0.67
 3 -2 0 7.06 0.58
 -3 2 0 7.65 0.57
 -3 2 0 8.27 0.65
 -3 -2 0 7.91 0.57
 -4 2 0 0.59 0.34
 4 2 0 0.38 0.26
 -4 -2 0 0.58 0.3
 -4 -2 0 0.82 0.31
 4 -2 0 0.42 0.23
 4 -2 0 0.67 0.3
 -4 2 0 0.13 0.24
 4 2 0 0.14 0.3
 5 2 0 1.35 0.36
 5 -2 0 1.51 0.46
 5 -2 0 1.31 0.39
 -5 2 0 1.47 0.47
 5 2 0 0.91 0.42
 -5 2 0 0.91 0.37
 -5 -2 0 1.48 0.43
 6 -2 0 3.68 0.65
 -6 -2 0 2.47 0.56
 6 2 0 4.22 0.77
 6 -2 0 2.97 0.62
 -6 2 0 2.46 0.58
 7 2 0 0.85 0.47
 -7 -2 0 0.31 0.36
 -7 2 0 0.93 0.44
 7 -2 0 0.43 0.39
 0 -3 0 -0.6 0.07
 0 3 0 -0.59 0.06
 0 3 0 -0.64 0.06
 0 3 0 -0.6 0.07
 0 -3 0 -0.62 0.07
 1 -3 0 0.44 0.16
 1 3 0 0.57 0.14
 1 3 0 0.46 0.17
 -1 -3 0 0.5 0.18
 -1 -3 0 0.3 0.13
 2 -3 0 36.28 1.21
 -2 3 0 33.97 1.2
 -2 -3 0 33.15 1.17
 2 3 0 33.69 1.18
 2 -3 0 34.13 1.18
 -2 -3 0 35.12 1.28
 -2 3 0 33.53 1.25
 2 3 0 33.21 1.27
 -3 3 0 111.03 3.35
 3 -3 0 117.17 3.37
 -3 -3 0 109.45 3.33
 3 -3 0 115.81 3.41
 3 3 0 112.66 3.49
 -3 -3 0 113.93 3.5
 3 3 0 116.94 3.35
 -3 3 0 110.03 3.48
 -4 3 0 0.11 0.23
 -4 -3 0 0.25 0.28
 4 -3 0 0.21 0.26
 4 3 0 0.34 0.22
 4 -3 0 0.34 0.29
 4 3 0 0.23 0.27
 -4 3 0 0.21 0.23
 -4 -3 0 0.38 0.24
 5 3 0 13.63 1.01
 -5 -3 0 11.92 0.9
 5 -3 0 12.31 0.92
 5 3 0 13.46 0.92
 -5 3 0 11.27 0.89
 5 -3 0 14.03 0.94
 -5 3 0 14.7 1.12
 6 3 0 4.53 0.74
 6 -3 0 4.88 0.74
 6 -3 0 6.06 0.84
 -6 -3 0 5.49 0.75
 -6 3 0 4.4 0.68
 -7 3 0 0.72 0.42
 -7 -3 0 0.27 0.39
 7 3 0 0.41 0.36
 7 -3 0 0.18 0.33
 0 -4 0 549.78 14.02
 0 4 0 537.41 14.19
 0 4 0 537.31 14.21
 0 4 0 530.94 14.21
 1 4 0 1.69 0.24
 -1 -4 0 1.6 0.19
 -1 4 0 1.55 0.21
 1 4 0 2.31 0.23
 1 -4 0 2.26 0.24
 -1 -4 0 2.14 0.25
 -2 4 0 0.19 0.16
 2 -4 0 0.2 0.16
 -2 4 0 0.09 0.19
 -2 -4 0 0.2 0.15
 2 4 0 0.2 0.15
 2 4 0 0.09 0.16
 -2 -4 0 0 0.17
 3 -4 0 17.08 0.86
 -3 4 0 15.79 0.84
 3 4 0 18.05 0.85
 -3 -4 0 16.21 0.83
 3 4 0 17.89 0.97
 3 -4 0 16.84 0.84
 -3 -4 0 17.72 0.95
 -3 4 0 17.06 0.94
 -4 -4 0 25.83 1.22
 4 -4 0 23.96 1.2
 -4 4 0 24.79 1.23
 4 -4 0 27.41 1.25
 -4 -4 0 28.27 1.38
 5 -4 0 1.59 0.47
 5 4 0 2.5 0.47
 -5 4 0 1.88 0.45
 -5 4 0 2.38 0.57
 5 -4 0 1.71 0.42
 -5 -4 0 2.48 0.52
 5 4 0 1.31 0.45
 -6 -4 0 0.7 0.4
 -6 4 0 0.8 0.4
 6 4 0 0.65 0.45
 6 -4 0 0.8 0.43
 6 -4 0 0.65 0.32
 -7 -4 0 4.3 0.74
 7 4 0 2.7 0.69
 -7 4 0 3.19 0.69
 0 5 0 -0.05 0.1
 0 5 0 -0.15 0.12
 0 -5 0 -0.26 0.1
 0 5 0 -0.08 0.1
 1 5 0 14.62 0.59
 -1 -5 0 15.86 0.65
 -1 -5 0 14.98 0.6
 -1 5 0 14.71 0.66
 1 5 0 14.43 0.64
 1 -5 0 15.45 0.63
 -1 5 0 15.32 0.63
 2 5 0 2.44 0.3
 -2 5 0 2.79 0.32
 -2 -5 0 3.25 0.39
 2 -5 0 1.97 0.29
 2 5 0 1.89 0.32
 -2 -5 0 2.43 0.31
 -2 5 0 2.18 0.33
 -3 -5 0 3.06 0.41
 3 5 0 2.09 0.39
 3 -5 0 3.49 0.45
 -3 -5 0 3.55 0.48
 -3 5 0 2.79 0.45
 -3 5 0 2.9 0.41
 3 5 0 2.66 0.38
 -4 5 0 61.87 2.23
 4 -5 0 63.36 2.24
 -4 5 0 66.15 2.44
 -4 -5 0 65.4 2.39
 4 5 0 64.66 2.23
 -4 -5 0 57.47 2.17
 4 5 0 58.9 2.34
 -5 -5 0 1.87 0.41
 5 -5 0 0.88 0.36
 6 -5 0 3.3 0.67
 -6 5 0 3.03 0.58
 6 5 0 3.15 0.67
 -6 -5 0 3.65 0.66
 7 5 0 1.65 0.58
 -7 -5 0 0.95 0.47
 0 6 0 403.86 10.65
 0 -6 0 387.8 10.3
 0 6 0 403.2 10.5
 0 6 0 411.14 10.47
 1 6 0 123.12 3.28
 -1 6 0 120.1 3.4
 -1 6 0 123.51 3.32
 1 -6 0 117.69 3.3
 -1 -6 0 121.2 3.28
 -1 -6 0 123.55 3.34
 1 6 0 114.43 3.34
 -2 6 0 146.84 4.22
 2 6 0 148.88 4.28
 -2 -6 0 160 4.29
 2 -6 0 152.92 4.21
 -2 -6 0 144.63 4.15
 2 6 0 154.04 4.17
 3 6 0 1.38 0.28
 -3 6 0 1.67 0.33
 -3 -6 0 2.46 0.43
 -3 -6 0 1.63 0.3
 3 -6 0 1.97 0.36
 -3 6 0 1.39 0.33
 3 6 0 1.49 0.37
 4 6 0 2.79 0.53
 4 -6 0 2.16 0.42
 4 6 0 2.7 0.44
 -4 -6 0 2.44 0.44
 -4 6 0 2.66 0.53
 -4 6 0 2.5 0.45
 -4 -6 0 2.86 0.52
 -5 6 0 3.71 0.71
 -5 -6 0 5.79 0.72
 5 -6 0 4.09 0.6
 -5 6 0 4.65 0.67
 5 6 0 4.22 0.74
 6 6 0 11.51 1.08
 6 -6 0 12.98 1.03
 -6 -6 0 12.48 1.03
 -6 6 0 11.34 0.98
 7 6 0 0.82 0.49
 -7 -6 0 1.41 0.52
 0 7 0 0.73 0.16
 0 -7 0 0.54 0.16
 0 7 0 0.6 0.15
 0 7 0 1 0.2
 -1 7 0 2.37 0.32
 -1 -7 0 2.42 0.3
 1 -7 0 3.03 0.33
 -1 -7 0 2.99 0.3
 1 7 0 2.79 0.33
 -1 7 0 2.59 0.3
 1 7 0 3.17 0.28
 -2 7 0 42.4 1.5
 -2 7 0 42.32 1.49
 2 7 0 44.93 1.58
 2 -7 0 43.2 1.5
 -2 -7 0 41.33 1.45
 2 7 0 45.36 1.48
 -2 -7 0 44.89 1.56
 3 -7 0 38.16 1.5
 3 7 0 38.96 1.61
 -3 7 0 38.73 1.59
 -3 -7 0 42.26 1.62
 -3 7 0 39.24 1.52
 3 7 0 40.01 1.48
 -3 -7 0 37.24 1.45
 4 -7 0 22.83 1.16
 4 7 0 20.1 1.21
 -4 7 0 22 1.15
 -4 -7 0 21.46 1.11
 -4 7 0 22.72 1.27
 -5 7 0 -0.47 0.21
 5 7 0 0.1 0.29
 5 -7 0 0.1 0.26
 -5 7 0 -0.2 0.21
 -5 -7 0 0.09 0.28
 -6 -7 0 0.63 0.35
 -6 7 0 0.11 0.3
 6 7 0 0.26 0.4
 -7 -7 0 0.86 0.46
 0 8 0 25.43 0.91
 0 8 0 25 0.96
 0 8 0 25.2 0.9
 0 -8 0 25.98 0.98
 -1 -8 0 0 0.11
 -1 8 0 0.16 0.17
 -1 -8 0 0.34 0.18
 1 -8 0 0.32 0.16
 1 8 0 -0.08 0.11
 1 8 0 -0.07 0.15
 -1 8 0 0.23 0.14
 -2 -8 0 36.34 1.31
 -2 8 0 36.59 1.44
 -2 -8 0 38.26 1.41
 2 8 0 33.45 1.38
 2 8 0 38.81 1.33
 2 -8 0 37.12 1.36
 -2 8 0 38.56 1.37
 3 8 0 0.86 0.26
 -3 -8 0 1.14 0.3
 3 -8 0 0.8 0.26
 -3 8 0 1.14 0.38
 -3 -8 0 0.65 0.29
 -3 8 0 0.44 0.21
 3 8 0 0.76 0.3
 -4 -8 0 8.09 0.67
 4 -8 0 4.92 0.6
 5 -8 0 0.54 0.31
 -5 8 0 0.72 0.37
 -5 -8 0 0.49 0.31
 5 8 0 0.66 0.36
 -5 8 0 0.67 0.32
 -6 -8 0 13.89 1.08
 6 8 0 12.6 1.13
 -7 -8 0 -0.13 0.32
 7 8 0 0.28 0.42
 0 9 0 0.1 0.15
 0 -9 0 0.05 0.14
 0 9 0 0.21 0.12
 0 9 0 0.05 0.11
 -1 -9 0 21.16 0.88
 -1 9 0 19.52 0.9
 1 9 0 21.78 0.84
 1 -9 0 21.38 0.88
 -1 9 0 20.27 0.85
 1 9 0 18.72 0.87
 -1 -9 0 19.49 0.81
 2 9 0 30.72 1.3
 -2 9 0 30.46 1.24
 2 9 0 33.99 1.23
 -2 -9 0 36.36 1.34
 2 -9 0 31.18 1.25
 -2 9 0 32.36 1.35
 -2 -9 0 33.19 1.23
 -3 9 0 -0.14 0.19
 3 9 0 -0.07 0.21
 -3 9 0 0.06 0.06
 3 -9 0 0.28 0.21
 -3 -9 0 0.15 0.21
 -3 -9 0 0.06 0.16
 -4 9 0 0.68 0.29
 4 -9 0 0.69 0.31
 4 9 0 0.39 0.31
 -4 9 0 0.95 0.36
 -4 -9 0 0.46 0.28
 -5 9 0 5.59 0.82
 5 9 0 6.31 0.88
 5 -9 0 6.54 0.81
 -5 -9 0 5.54 0.73
 -5 9 0 5.45 0.71
 -6 -9 0 0.1 0.28
 6 9 0 -0.07 0.32
 -7 -9 0 0.29 0.36
 7 9 0 0.66 0.42
 0 10 0 108.07 3
 0 -10 0 107.07 3.1
 0 10 0 104.68 2.98
 0 10 0 99.38 3.05
 -1 10 0 5.71 0.49
 1 10 0 6.34 0.5
 1 10 0 5.63 0.43
 1 -10 0 5.54 0.45
 -1 10 0 4.8 0.41
 1 10 0 5.84 0.42
 -1 -10 0 6.35 0.48
 -1 -10 0 5.46 0.41
 2 10 0 21.27 1.05
 -2 -10 0 22.62 1.03
 2 -10 0 23.16 1.02
 -2 10 0 22.03 1
 2 10 0 22.38 0.96
 -2 10 0 23.23 1.13
 -2 -10 0 22.92 0.98
 -3 -10 0 5.42 0.59
 -3 10 0 5.86 0.63
 -3 -10 0 6.26 0.59
 -3 10 0 6.32 0.7
 3 10 0 4.98 0.63
 3 -10 0 5.7 0.62
 -4 10 0 0.48 0.27
 -4 -10 0 0.65 0.29
 4 -10 0 0.85 0.32
 -4 10 0 0.76 0.37
 4 10 0 0.57 0.35
 5 10 0 4.29 0.72
 -5 -10 0 4.57 0.67
 -5 10 0 4.64 0.69
 -5 10 0 5.05 0.8
 -6 -10 0 3.78 0.63
 6 10 0 1.46 0.55
 0 11 0 0.27 0.15
 0 -11 0 0.19 0.17
 0 11 0 0.45 0.16
 0 11 0 0.19 0.19
 1 11 0 12.05 0.63
 1 11 0 12.21 0.62
 -1 11 0 11.35 0.64
 1 11 0 11.61 0.69
 -1 11 0 10.75 0.69
 1 -11 0 10.99 0.65
 -1 -11 0 11.59 0.67
 -1 -11 0 11.13 0.61
 -2 11 0 12.96 0.75
 -2 -11 0 13.64 0.78
 2 11 0 11.81 0.78
 -2 11 0 14.3 0.87
 -2 -11 0 12.22 0.7
 2 -11 0 13.43 0.77
 3 11 0 0.49 0.3
 -3 11 0 0.29 0.22
 -3 -11 0 0.27 0.23
 -3 11 0 0.46 0.29
 -3 11 0 0.34 0.23
 3 -11 0 0.85 0.29
 4 -11 0 0.72 0.31
 -4 11 0 0 0.07
 -4 -11 0 0.45 0.28
 4 11 0 0.05 0.3
 -4 11 0 0.2 0.24
 -5 -11 0 -0.11 0.26
 -5 11 0 0.59 0.37
 5 11 0 0.58 0.42
 6 11 0 0.2 0.39
 -6 -11 0 0.3 0.34
 0 12 0 65.05 2.07
 0 12 0 65.39 2.17
 0 -12 0 68.32 2.22
 -1 -12 0 -0.02 0.15
 1 12 0 -0.09 0.17
 -1 12 0 0.39 0.24
 1 12 0 0.23 0.17
 -1 -12 0 0.2 0.19
 1 -12 0 0.26 0.18
 -1 12 0 0.21 0.16
 2 12 0 37.94 1.59
 -2 12 0 39.48 1.53
 -2 -12 0 43.26 1.6
 2 -12 0 39.74 1.55
 -2 -12 0 41.3 1.5
 -2 12 0 38.5 1.63
 -3 12 0 2.5 0.45
 -3 12 0 2.48 0.44
 3 -12 0 2 0.38
 3 12 0 2.07 0.46
 -3 12 0 2.91 0.53
 -3 -12 0 2.4 0.43
 -4 -12 0 2.77 0.48
 -4 12 0 3.07 0.52
 -4 12 0 3.04 0.61
 4 12 0 2.4 0.55
 4 -12 0 2.18 0.45
 -4 12 0 2.96 0.54
 -5 12 0 2.06 0.54
 5 12 0 1.71 0.53
 -5 -12 0 1.73 0.46
 6 12 0 1.15 0.52
 -6 -12 0 0.48 0.35
 0 -13 0 0.97 0.28
 -1 -13 0 8.76 0.62
 -1 13 0 7.64 0.64
 1 -13 0 8.77 0.66
 1 13 0 8.09 0.53
 1 13 0 8.26 0.65
 -1 13 0 8.32 0.58
 -2 13 0 151.54 4.64
 2 -13 0 158.25 4.55
 2 13 0 154.28 4.6
 -2 13 0 161.46 4.53
 -2 -13 0 148.78 4.42
 3 13 0 1.49 0.43
 -3 13 0 2.25 0.48
 -3 -13 0 1.47 0.35
 -3 13 0 1.47 0.38
 3 -13 0 1.37 0.36
 -3 13 0 2.09 0.43
 -4 13 0 0.46 0.28
 -4 13 0 0.36 0.33
 -4 -13 0 0.2 0.24
 4 13 0 0.09 0.28
 5 13 0 -0.31 0.28
 -5 -13 0 -0.56 0.2
 -6 -13 0 3.16 0.64
 6 13 0 3.82 0.8
 -1 14 0 11.63 0.7
 1 14 0 10.68 0.75
 -1 14 0 9.91 0.74
 1 14 0 11.41 0.65
 2 -14 0 26.89 1.22
 -2 14 0 23.39 1.24
 -2 14 0 26.96 1.19
 2 14 0 23.44 1.22
 -2 -14 0 23.31 1.1
 -3 14 0 -0.02 0.26
 -3 -14 0 -0.2 0.19
 -3 14 0 0.12 0.22
 -3 14 0 0.18 0.21
 3 -14 0 0.03 0.23
 3 14 0 -0.17 0.23
 -4 14 0 2.25 0.59
 -4 -14 0 3.15 0.53
 4 14 0 2.86 0.6
 5 14 0 0.57 0.4
 -5 14 0 0.23 0.36
 -5 -14 0 0.15 0.3
 1 15 0 0.29 0.26
 -1 15 0 0.63 0.29
 -1 15 0 1.44 0.33
 1 15 0 1.43 0.3
 2 15 0 0.46 0.21
 -2 15 0 1.02 0.34
 2 -15 0 0.72 0.28
 -2 -15 0 0.53 0.23
 2 15 0 0.61 0.34
 -2 15 0 0.6 0.25
 3 15 0 2.38 0.54
 -3 15 0 3 0.58
 -3 -15 0 2.1 0.41
 -4 -15 0 1.81 0.43
 -4 15 0 2 0.56
 4 15 0 2.17 0.58
 -5 15 0 8.66 1.11
 -5 -15 0 6.55 0.81
 5 15 0 6.66 0.96
 0 16 0 33.03 1.4
 0 16 0 28.14 1.22
 -1 16 0 26.83 1.19
 1 16 0 23.49 1.22
 -1 16 0 25.82 1.27
 1 16 0 26.17 1.11
 2 -16 0 -0.03 0.21
 -2 -16 0 0.01 0.19
 2 16 0 0.56 0.31
 2 16 0 -0.04 0.16
 -2 16 0 -0.06 0.23
 3 16 0 4.5 0.68
 -3 16 0 3.71 0.67
 -3 -16 0 3.8 0.54
 -4 16 0 13.06 1.09
 -4 -16 0 11.92 0.91
 4 16 0 12.78 1.08
 -5 16 0 0.36 0.43
 -1 17 0 0.02 0.25
 1 17 0 -0.25 0.21
 2 17 0 0.02 0.28
 -2 17 0 1.33 0.42
 3 17 0 0.63 0.35
 -3 -17 0 0.16 0.26
 -3 17 0 -0.16 0.25
 -4 -17 0 2.34 0.49
 -4 17 0 2.78 0.61
 4 17 0 1.45 0.52
 -1 18 0 7.19 0.8
 1 18 0 7.78 0.73
 -2 18 0 14.97 1.04
 2 18 0 14.21 1.02
 -3 18 0 2.13 0.52
 -3 -18 0 1.27 0.37
 3 18 0 2.2 0.55
 1 19 0 37.24 1.7
 -1 19 0 37.2 1.7
 2 19 0 -0.18 0.27
 -2 19 0 0.25 0.33
 0 20 0 19.51 1.19
 1 20 0 -0.41 0.24
 -1 20 0 0.12 0.28
 0 0 1 -0.04 0.01
 0 0 1 -0.01 0
 0 0 -1 0.01 0.02
 0 0 -1 0 0.02
 -1 0 1 399.51 10.87
 -1 0 -1 394.67 10.71
 -1 0 1 387.34 10.83
 -1 0 -1 402.54 10.78
 1 0 1 406.93 10.48
 1 0 -1 420 10.73
 1 0 -1 397.58 10.93
 1 0 1 381.23 10.62
 2 0 -1 783.95 19.74
 2 0 1 694.77 19.75
 -2 0 -1 808.66 20.52
 2 0 1 776.55 20.2
 -2 0 1 770.92 20.12
 -2 0 -1 732.54 19.57
 2 0 -1 797.69 20.73
 -2 0 1 701.6 19.69
 3 0 1 24.04 1.02
 -3 0 1 24 1.15
 3 0 1 23.74 1.09
 3 0 -1 24.2 1.04
 -3 0 -1 24.12 1.14
 3 0 -1 23.17 1.12
 -3 0 1 23.01 1.03
 -3 0 -1 23.17 1.03
 4 0 1 39.64 1.59
 -4 0 1 43.2 1.83
 4 0 -1 41.42 1.64
 4 0 -1 37.88 1.71
 -4 0 -1 42.39 1.8
 -4 0 -1 41.05 1.63
 4 0 1 38.74 1.67
 -4 0 1 40.5 1.64
 5 0 1 2.36 0.46
 -5 0 1 1.37 0.43
 5 0 -1 1.51 0.47
 5 0 1 1.52 0.46
 5 0 -1 0.75 0.3
 -5 0 -1 1.67 0.45
 6 0 1 1.01 0.43
 6 0 1 1.92 0.51
 -6 0 1 2.56 0.58
 6 0 -1 1.36 0.5
 6 0 -1 1.64 0.45
 -6 0 -1 2.3 0.55
 7 0 -1 3.3 0.68
 7 0 1 3.72 0.7
 -7 0 1 2.46 0.6
 -7 0 -1 2.77 0.65
 -8 0 -1 6.11 0.97
 0 -1 1 188.67 4.77
 0 1 -1 175.21 4.94
 1 -1 1 56.96 1.6
 -1 1 1 55.9 1.66
 1 1 -1 58.14 1.61
 -1 -1 -1 56.51 1.57
 -1 1 1 56.66 1.6
 -1 -1 -1 56.19 1.62
 1 1 -1 58 1.67
 -1 1 -1 55.17 1.6
 -1 1 -1 59.17 1.6
 1 1 1 57.64 1.58
 1 -1 -1 55.54 1.65
 1 -1 -1 54.44 1.59
 -1 -1 1 57.32 1.67
 1 1 1 55.27 1.61
 2 1 -1 94.87 2.87
 2 -1 1 100.39 2.77
 -2 -1 -1 94.33 2.83
 -2 1 1 98.25 2.88
 2 1 -1 97.49 2.77
 -2 1 1 95.88 2.76
 -2 -1 -1 88.3 2.72
 2 -1 1 93.35 2.77
 2 1 1 98.16 2.75
 -2 1 -1 94.77 2.76
 -2 -1 1 98.87 2.77
 -2 1 -1 98.73 2.84
 2 -1 -1 102.34 2.78
 2 -1 -1 97.2 2.86
 2 1 1 93.16 2.8
 -2 -1 1 98.03 2.88
 -3 1 1 32.52 1.38
 3 1 -1 31.27 1.24
 3 -1 1 30.2 1.26
 -3 -1 -1 30.52 1.33
 3 -1 1 31.24 1.22
 -3 -1 -1 31.29 1.22
 -3 1 1 31.38 1.24
 3 1 -1 27.93 1.29
 -3 1 -1 28.88 1.3
 -3 -1 1 30.84 1.33
 -3 1 -1 30.89 1.22
 3 1 1 32.41 1.32
 3 -1 -1 31.19 1.23
 -3 -1 1 28.9 1.2
 3 -1 -1 30.79 1.31
 3 1 1 28.6 1.18
 -4 -1 -1 117.15 3.62
 -4 -1 -1 120.8 3.85
 4 -1 1 119.54 3.64
 4 -1 1 110.68 3.68
 -4 1 1 111.51 3.63
 4 1 -1 115.75 3.8
 -4 1 1 129.09 3.93
 4 1 -1 114.74 3.62
 4 1 1 122.58 3.65
 4 -1 -1 122.46 3.81
 -4 -1 1 120.34 3.85
 -4 1 -1 117.43 3.83
 -4 1 -1 121.65 3.67
 4 1 1 119.18 3.75
 -4 -1 1 116.31 3.65
 -5 1 1 3.61 0.67
 5 -1 1 3.1 0.52
 -5 1 1 3.42 0.6
 5 1 -1 3.43 0.56
 -5 -1 -1 4.88 0.67
 5 -1 1 4.12 0.64
 5 1 -1 3.79 0.65
 5 1 1 4.18 0.66
 -5 -1 1 4.96 0.68
 -5 1 -1 4.43 0.65
 5 -1 -1 2.32 0.47
 5 1 1 3.46 0.51
 5 -1 -1 5.14 0.79
 -6 -1 -1 16.05 1.15
 6 1 -1 15.65 1.25
 6 -1 1 16.69 1.18
 6 1 -1 17.47 1.16
 6 -1 1 17.41 1.16
 -6 1 1 17.5 1.19
 -6 -1 1 15.15 1.11
 -6 1 -1 16.02 1.16
 6 -1 -1 15.4 1.18
 6 -1 -1 18.39 1.17
 6 1 1 14.3 1.15
 -7 -1 -1 1.16 0.49
 -7 1 1 1.34 0.51
 7 1 -1 1.68 0.54
 7 -1 1 0.89 0.47
 -7 1 -1 0.44 0.42
 7 -1 -1 1.58 0.55
 7 1 1 1.12 0.47
 -7 -1 1 0.64 0.39
 0 -2 1 20.1 0.62
 0 -2 1 21.16 0.65
 0 2 -1 20.22 0.63
 0 2 -1 19.94 0.65
 1 -2 1 68.45 1.86
 -1 -2 -1 65.45 1.81
 -1 2 1 62.79 1.88
 1 2 -1 64.43 1.92
 1 2 -1 68.21 1.87
 -1 -2 -1 68.8 1.87
 1 2 1 67.72 1.81
 -1 -2 1 65.88 1.86
 -1 -2 1 67.23 1.92
 -1 2 -1 64.07 1.86
 1 -2 -1 64.59 1.88
 1 2 1 66.87 1.87
 1 -2 -1 64.9 1.84
 -2 -2 -1 134.15 3.67
 -2 -2 -1 130.76 3.76
 2 2 -1 133.1 3.81
 -2 2 1 134.64 3.81
 -2 2 1 131.68 3.69
 2 -2 1 131.22 3.69
 2 2 -1 132.67 3.69
 -2 -2 1 137.44 3.82
 2 2 1 132.24 3.76
 2 -2 -1 127.47 3.68
 -2 2 -1 139.84 3.78
 2 2 1 143.05 3.68
 2 -2 -1 128.67 3.76
 -2 -2 1 129.76 3.69
 -2 2 -1 134.49 3.7
 3 2 -1 15.97 0.83
 -3 2 1 17.71 0.97
 -3 -2 -1 17.46 0.94
 3 -2 1 16.3 0.83
 3 2 -1 16.31 0.93
 3 -2 1 17.79 0.86
 -3 -2 -1 16.48 0.83
 -3 2 1 15.64 0.83
 -3 2 -1 18.15 0.94
 3 2 1 17.16 0.91
 -3 -2 1 15.45 0.81
 -3 -2 1 16.95 0.95
 3 -2 -1 16.55 0.9
 -3 2 -1 15.45 0.82
 3 2 1 17.57 0.83
 3 -2 -1 17.56 0.86
 -4 2 1 12.08 0.9
 -4 -2 -1 11.7 0.87
 4 2 -1 10.41 0.84
 -4 -2 -1 11.84 0.79
 -4 2 1 11.95 0.8
 4 -2 1 11.04 0.8
 4 2 -1 12.03 0.8
 4 -2 1 12.95 0.82
 -4 2 -1 12.64 0.9
 -4 -2 1 12.15 0.92
 -4 -2 1 11.58 0.78
 -4 2 -1 11.71 0.8
 4 -2 -1 9.41 0.73
 4 -2 -1 11.97 0.87
 4 2 1 10.97 0.81
 4 2 1 11.91 0.77
 -5 -2 -1 17.22 1.07
 5 -2 1 17.39 1.1
 -5 2 1 17.51 1.1
 5 -2 1 17.94 1.07
 -5 2 1 16.7 1.2
 5 2 -1 17.51 1.2
 5 2 -1 18.61 1.1
 -5 -2 1 19 1.12
 5 -2 -1 16.11 1.03
 5 -2 -1 17.25 1.14
 5 2 1 19 1.09
 -5 2 -1 19.7 1.14
 5 2 1 18.45 1.17
 6 -2 1 11.78 0.96
 -6 2 1 11.22 0.97
 6 -2 1 12.91 1
 -6 -2 -1 9.98 0.94
 6 2 -1 11.37 1.07
 6 -2 -1 12.53 0.97
 6 -2 -1 10.85 1.02
 -6 2 -1 12.06 0.98
 -6 -2 1 12.54 1.02
 6 2 1 11.1 0.99
 7 -2 1 -0.33 0.4
 7 2 -1 0.14 0.33
 -7 2 1 0.26 0.37
 -7 -2 -1 1.15 0.46
 7 2 1 1.09 0.47
 -7 2 -1 0.15 0.37
 7 -2 -1 0.13 0.37
 -7 -2 1 0.59 0.42
 0 -3 1 25.56 0.78
 0 -3 1 25.84 0.82
 0 -3 -1 25.34 0.7
 0 -3 -1 24.99 0.72
 0 3 1 25.12 0.69
 0 3 -1 24.41 0.81
 0 3 1 24.09 0.71
 0 3 1 24.97 0.69
 0 3 -1 25.04 0.78
 -1 -3 -1 232.87 6.05
 1 3 -1 236.69 6.19
 1 -3 1 230.18 6.12
 -1 -3 -1 242.92 6.12
 1 3 -1 236.91 6.12
 -1 3 1 228.24 6.13
 -1 3 1 241.2 6.1
 -1 -3 1 234.85 6.12
 1 -3 -1 236.94 6.09
 1 3 1 242.41 6.49
 -1 -3 1 241.91 6.19
 -1 3 -1 232.2 6.13
 1 -3 -1 238.28 6.09
 1 3 1 227.64 6.11
 -2 -3 -1 32.72 1.14
 2 3 -1 31.45 1.25
 -2 -3 -1 33.39 1.23
 -2 3 1 32.88 1.17
 2 3 -1 34.72 1.19
 2 -3 1 32.99 1.18
 -2 3 1 33.23 1.25
 2 -3 -1 34.08 1.23
 2 -3 -1 32.67 1.17
 2 3 1 33.85 1.15
 -2 3 -1 33.13 1.19
 2 3 1 30.95 1.2
 -2 -3 1 34.04 1.18
 -2 3 -1 33.73 1.22
 -2 -3 1 35.75 1.29
 -3 -3 -1 51.26 1.76
 3 -3 1 52.82 1.79
 -3 3 1 49.96 1.91
 3 3 -1 54.36 1.81
 3 3 -1 50.56 1.92
 -3 -3 -1 50.95 1.88
 -3 3 1 50.57 1.79
 3 3 1 55.67 1.78
 -3 -3 1 48.95 1.77
 3 3 1 48.09 1.84
 -3 3 -1 50.81 1.8
 3 -3 -1 52.46 1.79
 -3 -3 1 53.83 1.93
 3 -3 -1 53.64 1.88
 -3 3 -1 51.7 1.9
 -4 -3 -1 11.96 0.88
 4 3 -1 12.76 0.81
 -4 -3 -1 10.97 0.77
 4 -3 1 11.62 0.78
 -4 3 1 11.63 0.79
 -4 3 1 11.99 0.93
 4 -3 1 11.33 0.77
 4 3 -1 11.88 0.9
 -4 -3 1 10.93 0.77
 4 -3 -1 11.9 0.79
 -4 -3 1 11.9 0.88
 4 3 1 12.36 0.79
 -4 3 -1 12.9 0.82
 -4 3 -1 11.18 0.88
 4 -3 -1 11.36 0.85
 4 3 1 11.94 0.86
 5 -3 1 6.55 0.76
 5 3 -1 5.83 0.79
 -5 3 1 6.17 0.77
 5 -3 1 6.09 0.73
 -5 -3 -1 7.06 0.8
 5 3 -1 7.92 0.84
 -5 3 1 7.41 0.94
 5 3 1 7.54 0.7
 -5 -3 1 5.78 0.69
 5 -3 -1 6.2 0.71
 5 3 1 6.71 0.86
 -5 3 -1 7.06 0.81
 5 -3 -1 6.76 0.83
 6 3 -1 4.58 0.77
 -6 3 1 4.9 0.73
 -6 -3 -1 4.57 0.73
 6 -3 1 4.43 0.72
 6 3 1 4.4 0.74
 -6 -3 1 4.36 0.71
 6 -3 -1 5.41 0.73
 -6 3 -1 5.46 0.77
 6 -3 -1 4.27 0.71
 7 3 -1 0.31 0.37
 -7 -3 -1 0.82 0.47
 -7 3 1 0.38 0.37
 -7 3 -1 1.08 0.46
 7 -3 -1 0.58 0.44
 7 3 1 0.63 0.46
 -7 -3 1 -0.09 0.32
 0 -4 1 376.18 10.46
 0 -4 -1 387.02 9.95
 0 4 -1 392.57 10.29
 0 4 1 370.45 9.9
 0 4 1 373.15 10.03
 0 4 -1 394.71 10.22
 0 4 -1 378.83 9.82
 0 4 1 382.1 9.93
 0 -4 -1 395.64 9.95
 -1 -4 -1 247.76 6.7
 1 4 -1 271.31 6.79
 -1 4 1 258.64 6.75
 -1 -4 -1 269.17 6.77
 1 -4 1 270.08 6.8
 -1 4 1 256.38 6.78
 1 4 -1 262.33 6.86
 -1 -4 1 249.42 6.77
 1 -4 -1 255.76 7.09
 1 4 1 257.43 6.77
 1 4 1 265.11 6.71
 -1 4 -1 267.71 6.88
 -1 -4 1 268.82 6.86
 -2 -4 -1 14.86 0.73
 -2 4 1 13.89 0.73
 2 4 -1 14 0.76
 -2 -4 -1 14.22 0.65
 2 4 -1 14.92 0.69
 2 -4 1 14.9 0.71
 -2 4 1 14.31 0.68
 2 4 1 15.19 0.75
 2 -4 -1 16.08 0.71
 -2 -4 1 16.46 0.79
 2 4 1 15.37 0.66
 2 -4 -1 13.48 0.67
 -2 4 -1 15.37 0.71
 -2 4 -1 14.81 0.71
 -2 -4 1 14.72 0.69
 -3 4 1 1.51 0.31
 3 4 -1 1.7 0.39
 -3 -4 -1 1.4 0.33
 3 4 -1 1.2 0.28
 3 -4 1 2.22 0.36
 -3 -4 -1 1.15 0.26
 -3 4 1 1.66 0.36
 3 4 1 1.27 0.33
 3 4 1 1.41 0.28
 -3 4 -1 1.56 0.37
 -3 -4 1 1.51 0.32
 3 -4 -1 1.53 0.33
 3 -4 -1 1.34 0.29
 -3 -4 1 1.16 0.32
 -3 4 -1 2.24 0.36
 4 -4 1 0.8 0.29
 4 4 -1 1.32 0.34
 -4 -4 -1 1.04 0.34
 -4 -4 -1 0.91 0.31
 -4 4 1 0.84 0.38
 -4 4 1 0.82 0.3
 4 4 -1 1.14 0.37
 -4 -4 1 1.15 0.4
 4 -4 -1 1.3 0.36
 4 4 1 0.93 0.31
 -4 -4 1 0.54 0.28
 -4 4 -1 1.1 0.34
 4 4 1 0.66 0.3
 4 -4 -1 1 0.36
 -4 4 -1 0.94 0.33
 -5 4 1 13.54 1.09
 5 -4 1 13.34 0.91
 -5 4 1 11.88 0.9
 5 4 -1 11.24 0.96
 5 4 -1 13.02 0.91
 -5 -4 -1 11.68 0.88
 -5 -4 1 11.43 0.88
 -5 4 -1 12.65 0.93
 -5 4 -1 11.54 1
 5 4 1 11.46 0.96
 5 -4 -1 9.97 0.86
 5 -4 -1 12.91 0.93
 -6 -4 -1 0.98 0.42
 6 4 -1 1.07 0.48
 6 -4 1 0.71 0.37
 -6 4 1 1.04 0.43
 6 4 1 0.78 0.42
 6 -4 -1 0.38 0.33
 -6 4 -1 0.54 0.35
 -6 -4 1 0.81 0.42
 6 -4 -1 0.97 0.43
 -7 -4 -1 -0.08 0.32
 7 4 -1 0.38 0.43
 -7 4 1 1.22 0.48
 -7 4 -1 1.43 0.5
 7 4 1 0.52 0.44
 -7 -4 1 0.64 0.44
 7 -4 -1 0.78 0.5
 0 5 1 263.88 6.89
 0 -5 -1 269.09 6.88
 0 5 -1 263.21 7
 0 5 1 266.6 6.85
 0 5 -1 269.48 6.95
 0 5 -1 275.95 6.95
 0 -5 -1 269.55 6.9
 0 -5 1 270.5 7.01
 0 5 1 272.26 6.85
 1 -5 1 54.9 1.65
 -1 -5 -1 55.69 1.6
 -1 -5 -1 52.4 1.55
 1 5 -1 53.85 1.69
 -1 5 1 52.08 1.59
 1 5 -1 54.74 1.63
 1 5 1 52.04 1.6
 -1 -5 1 55 1.63
 1 -5 -1 54.61 1.6
 -1 5 -1 53.64 1.72
 1 5 1 53.51 1.54
 -1 -5 1 56.8 1.69
 -2 -5 -1 25.22 0.96
 2 5 -1 27.53 1.03
 -2 -5 -1 26.77 1.05
 -2 5 1 26.36 1.07
 2 -5 1 24.94 1.01
 2 5 -1 26.52 1.11
 2 5 1 25.82 1.05
 2 5 1 26.74 0.97
 -2 -5 1 25.37 1
 -2 -5 1 27.07 1.1
 -2 5 -1 26.36 1.03
 2 -5 -1 25.19 1
 -3 5 1 8.56 0.67
 3 -5 1 8.03 0.6
 3 5 -1 9.21 0.61
 -3 5 1 7.83 0.58
 -3 -5 -1 7.79 0.56
 -3 -5 -1 8.35 0.64
 3 5 -1 8.36 0.68
 3 5 1 8.43 0.56
 -3 -5 1 8.55 0.6
 3 -5 -1 8.62 0.6
 -3 5 -1 9.48 0.64
 3 5 1 7.63 0.63
 3 -5 -1 9.31 0.62
 -3 5 -1 9.01 0.68
 -3 -5 1 8.92 0.69
 -4 5 1 2.18 0.41
 4 5 -1 2.99 0.46
 -4 -5 -1 2.74 0.44
 4 5 -1 2.34 0.51
 4 -5 1 2.6 0.45
 -4 5 1 3.04 0.54
 -4 -5 -1 2.85 0.54
 4 -5 -1 2.86 0.49
 4 5 1 2.54 0.49
 -4 5 -1 2.54 0.44
 -4 5 -1 2.55 0.52
 4 5 1 1.94 0.37
 4 -5 -1 3.4 0.52
 -4 -5 1 3.53 0.58
 -4 -5 1 2.44 0.43
 5 -5 1 2.29 0.45
 5 5 -1 1.51 0.46
 -5 -5 -1 2.33 0.51
 -5 5 1 2.53 0.5
 -5 5 1 1.85 0.53
 5 -5 -1 2.28 0.49
 -5 5 -1 3.17 0.6
 5 -5 -1 2.16 0.45
 -5 -5 1 2.27 0.48
 5 5 1 1.77 0.52
 -5 5 -1 1.75 0.5
 6 -5 1 9.52 0.9
 -6 5 1 11.18 0.97
 6 5 -1 12.2 1.1
 -6 -5 -1 10.17 0.93
 -6 -5 1 12.03 0.99
 6 5 1 9.61 1.09
 -6 5 -1 8.26 0.93
 6 -5 -1 9.64 1.03
 6 -5 -1 11.71 0.97
 7 5 -1 3.57 0.79
 -7 -5 -1 1.82 0.53
 7 5 1 2.92 0.65
 -7 -5 1 2.36 0.58
 0 6 -1 200.43 5.3
 0 6 -1 204.66 5.29
 0 6 -1 199.46 5.35
 0 -6 1 198.62 5.36
 0 -6 -1 200.36 5.26
 0 6 1 200.92 5.2
 0 6 1 201.69 5.25
 0 6 1 203.43 5.2
 1 6 -1 17.28 0.72
 -1 6 1 17.36 0.68
 1 -6 1 18.27 0.74
 -1 6 1 17.84 0.74
 1 6 -1 17.1 0.77
 -1 -6 -1 16.83 0.64
 -1 -6 -1 17.77 0.69
 -1 -6 1 17.49 0.75
 -1 -6 1 17.45 0.72
 1 6 1 17.75 0.7
 1 -6 -1 18.48 0.7
 1 6 1 18.47 0.65
 -1 6 -1 17.18 0.79
 -1 6 -1 18.74 0.74
 -2 -6 -1 12.36 0.62
 -2 6 1 13.8 0.72
 2 6 -1 12.27 0.73
 -2 6 1 12.07 0.65
 2 6 -1 14.81 0.69
 2 -6 1 12.67 0.67
 -2 -6 -1 13.89 0.69
 -2 -6 1 13.47 0.67
 -2 6 -1 13.56 0.69
 2 6 1 12.82 0.62
 2 -6 -1 12.99 0.67
 -2 -6 1 13.91 0.74
 2 6 1 13.93 0.71
 3 6 -1 8.61 0.6
 -3 -6 -1 6.85 0.54
 3 6 -1 6.69 0.61
 3 -6 1 8.69 0.62
 -3 6 1 7.98 0.66
 -3 6 1 8.44 0.6
 -3 -6 -1 7.95 0.62
 -3 6 -1 7.4 0.59
 -3 -6 1 7.3 0.57
 3 -6 -1 8.29 0.6
 3 6 1 8 0.56
 -3 6 -1 8.26 0.66
 -3 -6 1 8.22 0.65
 3 6 1 7.69 0.64
 -4 6 1 31.24 1.42
 4 -6 1 29.09 1.4
 4 6 -1 34.41 1.44
 -4 6 1 32.41 1.57
 4 6 -1 30.14 1.53
 -4 -6 -1 31.85 1.39
 -4 -6 -1 34.19 1.55
 4 6 1 34.02 1.4
 -4 6 -1 30.75 1.53
 4 6 1 31.89 1.51
 -4 -6 1 32.58 1.56
 -4 6 -1 32.85 1.46
 -4 -6 1 32.12 1.42
 4 -6 -1 34.04 1.45
 -5 6 1 3.12 0.55
 -5 -6 -1 3 0.55
 -5 6 1 3.03 0.63
 5 -6 1 2.77 0.53
 5 6 -1 1.9 0.54
 5 -6 -1 2.43 0.5
 -5 -6 1 3.08 0.56
 -5 6 -1 2.75 0.53
 -5 6 -1 2.51 0.57
 5 6 1 2.55 0.54
 -6 6 1 2.13 0.51
 -6 -6 -1 2.93 0.58
 6 -6 1 2.49 0.56
 6 6 -1 2.98 0.68
 6 6 1 2.87 0.66
 6 -6 -1 3.04 0.56
 -6 -6 1 3.28 0.61
 -6 6 -1 2.84 0.62
 7 6 -1 0.74 0.45
 -7 -6 -1 -0.15 0.33
 -7 -6 1 0.35 0.39
 7 6 1 0.13 0.41
 0 7 1 28.16 0.89
 0 7 1 27.77 0.89
 0 -7 1 25.81 1.01
 0 -7 -1 27.99 0.95
 0 7 -1 26.35 1.01
 0 7 1 27.38 0.93
 0 7 -1 26.62 0.96
 0 7 -1 28.17 0.97
 1 7 -1 99.34 2.99
 -1 -7 -1 107.72 2.9
 -1 -7 -1 100.84 2.84
 -1 7 1 102.77 2.88
 1 7 -1 105.86 2.93
 -1 7 1 104.71 2.97
 1 -7 1 102.12 2.95
 1 -7 -1 105.44 2.89
 -1 7 -1 103.41 2.95
 -1 -7 1 99.73 2.91
 1 7 1 100.82 2.9
 -1 -7 1 108.91 3.01
 -1 7 -1 104.14 3.04
 1 7 1 104.61 2.84
 -2 7 1 3.73 0.43
 2 7 -1 2.97 0.35
 -2 7 1 3.22 0.37
 -2 -7 -1 3.4 0.36
 2 7 -1 3.19 0.44
 2 -7 1 2.63 0.37
 -2 -7 -1 2.71 0.36
 2 -7 -1 3 0.37
 -2 -7 1 3.7 0.42
 2 7 1 3.76 0.44
 2 7 1 3.92 0.39
 -2 -7 1 3.53 0.44
 3 7 -1 17.33 0.88
 -3 -7 -1 17.76 0.94
 -3 -7 -1 15.76 0.82
 -3 7 1 16.46 0.94
 3 -7 1 16.67 0.89
 3 7 -1 14.13 0.92
 3 7 1 17.76 0.84
 -3 -7 1 16.63 0.87
 -3 7 -1 17.22 0.9
 -3 -7 1 17.4 0.97
 -3 7 -1 15.54 0.92
 3 7 1 16.39 0.92
 3 -7 -1 16.61 0.87
 4 -7 1 9.64 0.76
 -4 -7 -1 10.16 0.73
 -4 7 1 9.9 0.75
 4 7 -1 9.55 0.82
 -4 7 1 11.76 0.91
 4 7 -1 11.48 0.84
 4 7 1 9.46 0.81
 -4 7 -1 10.76 0.79
 -4 -7 1 8.56 0.72
 4 -7 -1 10.87 0.78
 -4 7 -1 9.82 0.86
 -5 7 1 0.62 0.36
 -5 -7 -1 0.28 0.32
 5 7 -1 0.42 0.35
 5 -7 1 0.75 0.37
 -5 7 1 0.27 0.27
 -5 7 -1 0.44 0.33
 5 -7 -1 0.96 0.36
 -5 -7 1 0.54 0.32
 5 7 1 0.58 0.37
 -5 7 -1 1.18 0.43
 -6 7 1 6.96 0.87
 6 7 -1 7.26 1.04
 -6 -7 -1 5.13 0.73
 -6 -7 1 5.59 0.78
 6 7 1 6.05 0.86
 -6 7 -1 7.66 0.9
 7 7 -1 4.47 0.92
 -7 -7 -1 4.34 0.73
 -7 -7 1 3.77 0.7
 7 7 1 4.66 0.89
 0 8 1 24.13 0.9
 0 -8 -1 25.83 0.92
 0 8 -1 25.31 0.94
 0 -8 1 25.57 1
 0 8 -1 23.71 0.92
 0 8 1 25.33 0.86
 0 8 -1 24.96 0.99
 0 8 1 25.29 0.86
 -1 -8 -1 39.57 1.3
 1 8 -1 37.58 1.39
 -1 -8 -1 37.34 1.24
 1 -8 1 38.83 1.36
 -1 8 1 38.56 1.28
 -1 8 1 40.96 1.37
 1 8 -1 39.92 1.33
 1 -8 -1 40.75 1.31
 1 8 1 38.93 1.24
 -1 -8 1 37.15 1.31
 -1 -8 1 40.87 1.4
 -1 8 -1 39.8 1.35
 1 8 1 39.57 1.32
 -1 8 -1 38.85 1.43
 2 8 -1 2.87 0.43
 -2 -8 -1 2.68 0.32
 2 8 -1 2.58 0.35
 -2 -8 -1 2.82 0.37
 2 -8 1 2.85 0.39
 -2 8 1 2.66 0.38
 -2 8 1 2.53 0.34
 2 -8 -1 2.64 0.36
 2 8 1 2.6 0.31
 -2 8 -1 2.27 0.38
 2 8 1 3.26 0.43
 -2 -8 1 3.04 0.4
 -2 -8 1 3.43 0.45
 -3 8 1 3.28 0.51
 -3 -8 -1 4.06 0.51
 3 8 -1 3.61 0.44
 3 -8 1 3.52 0.49
 3 8 -1 4.15 0.54
 -3 -8 -1 3.56 0.42
 3 8 1 3.97 0.53
 -3 8 -1 4.53 0.53
 -3 8 -1 3.58 0.51
 3 8 1 4.35 0.47
 -3 -8 1 3.99 0.55
 -3 -8 1 3.71 0.46
 3 -8 -1 3.1 0.43
 -4 8 1 9.27 0.74
 4 8 -1 9.2 0.83
 4 -8 1 8.56 0.72
 -4 8 1 10.02 0.84
 -4 -8 -1 9.22 0.71
 4 -8 -1 9.86 0.77
 -4 -8 1 10.45 0.76
 4 8 1 8.04 0.77
 -4 8 -1 9.69 0.81
 -4 8 -1 8.63 0.73
 5 -8 1 5.07 0.68
 -5 8 1 7.88 1.01
 -5 8 1 4.58 0.66
 -5 -8 -1 5.39 0.68
 5 8 -1 6.28 0.86
 -5 -8 1 5.23 0.71
 -5 8 -1 6.81 0.93
 5 -8 -1 5.25 0.7
 5 8 1 5.94 0.85
 -5 8 -1 6.48 0.81
 -6 -8 -1 1.03 0.4
 6 8 -1 0.66 0.42
 6 8 1 0.28 0.42
 -6 8 -1 0.82 0.38
 -6 -8 1 0.2 0.3
 -7 -8 -1 2.24 0.6
 7 8 -1 2.81 0.73
 7 8 1 1.55 0.55
 -7 -8 1 1.57 0.57
 0 9 -1 67.64 2.08
 0 9 1 68.53 2.06
 0 9 -1 71.54 2.1
 0 -9 -1 68.48 2.08
 0 9 1 71.52 2.01
 0 9 1 66.9 1.98
 0 9 -1 66.24 2.15
 0 -9 1 68.74 2.17
 -1 9 1 21.66 0.94
 1 9 -1 24.35 0.95
 -1 -9 -1 20.99 0.84
 -1 9 1 22.37 0.88
 1 9 -1 22.55 1
 -1 -9 -1 23.07 0.9
 1 -9 1 22.57 0.95
 -1 -9 1 26.17 1.03
 -1 9 -1 22.24 0.94
 1 -9 -1 23.72 0.91
 -1 -9 1 22.25 0.92
 -1 9 -1 23.96 1.04
 1 9 1 23.25 0.85
 1 9 1 22.17 0.92
 -2 9 1 4.62 0.43
 2 9 -1 4.52 0.53
 -2 9 1 4.53 0.52
 -2 -9 -1 4.38 0.39
 2 9 -1 5.16 0.45
 -2 -9 -1 5.01 0.51
 -2 9 1 3.9 0.44
 2 -9 1 5.16 0.53
 -2 9 -1 3.85 0.51
 -2 -9 1 5.31 0.55
 2 9 1 4.64 0.39
 2 9 1 4.73 0.5
 2 -9 -1 4.66 0.44
 -2 9 -1 4.69 0.44
 -2 -9 1 4.12 0.44
 -3 -9 -1 12.4 0.8
 -3 9 1 13.6 0.8
 -3 9 1 12.93 0.85
 3 9 -1 11.13 0.84
 -3 -9 -1 12.88 0.74
 3 -9 1 14.27 0.82
 -3 -9 1 13.66 0.86
 3 -9 -1 11.08 0.75
 -3 9 -1 13.18 0.8
 3 9 1 12.46 0.83
 -3 -9 1 12.56 0.77
 -3 9 -1 13.43 0.84
 -4 9 1 3.28 0.51
 -4 9 1 2.42 0.53
 4 -9 1 3.18 0.53
 4 9 -1 2.73 0.56
 -4 -9 -1 3.29 0.49
 -4 9 -1 3.23 0.51
 4 9 1 2.04 0.47
 -4 -9 1 2.74 0.49
 4 -9 -1 2.3 0.45
 -4 9 -1 3.43 0.61
 -5 -9 -1 3.33 0.55
 -5 9 1 3.65 0.68
 5 9 -1 2.25 0.62
 5 -9 1 3.07 0.55
 -5 9 1 2.88 0.56
 5 9 1 1.28 0.48
 -5 9 -1 3.12 0.6
 -5 -9 1 2.61 0.53
 -5 9 -1 3.6 0.68
 5 -9 -1 2.09 0.47
 -6 -9 -1 8.92 0.98
 6 9 -1 8.6 1.1
 6 9 1 5.74 0.89
 -6 -9 1 9.9 1.04
 7 9 -1 1.42 0.59
 -7 -9 -1 0.67 0.42
 7 9 1 0.17 0.42
 -7 -9 1 0.95 0.48
 0 -10 -1 0.49 0.19
 0 10 1 0.45 0.19
 0 10 1 0.61 0.17
 0 10 1 0.52 0.16
 0 10 -1 0.45 0.18
 0 10 -1 0.47 0.22
 0 10 -1 0.58 0.19
 0 -10 1 0.47 0.22
 1 10 -1 61.59 2.14
 1 -10 1 64.05 2.11
 1 10 -1 69.6 2.09
 -1 10 1 67.19 2.12
 -1 10 1 63.92 2.02
 -1 -10 -1 68.15 2.06
 -1 -10 -1 61.93 1.97
 -1 -10 1 64.31 2.06
 1 -10 -1 65.95 2.05
 1 10 1 67.12 1.98
 1 10 1 67.1 1.99
 -1 10 -1 66.04 2.19
 -1 -10 1 71.1 2.18
 1 10 1 66.05 2.07
 -1 10 -1 66.65 2.1
 2 10 -1 7.87 0.55
 -2 10 1 7.54 0.61
 2 10 -1 7.22 0.61
 -2 10 1 7.97 0.56
 2 -10 1 7.57 0.57
 -2 -10 -1 8.13 0.53
 -2 -10 -1 8.24 0.58
 -2 10 1 8.65 0.57
 -2 10 -1 8.18 0.59
 2 10 1 7.44 0.57
 -2 -10 1 7.77 0.56
 -2 -10 1 7.85 0.61
 2 -10 -1 8.51 0.57
 2 10 1 8.06 0.51
 -2 10 -1 7.53 0.64
 -3 10 1 3.35 0.45
 3 -10 1 2.34 0.41
 -3 -10 -1 3.2 0.48
 -3 -10 -1 2.63 0.39
 -3 10 1 3.19 0.51
 3 10 -1 3.05 0.53
 -3 -10 1 3.85 0.5
 -3 10 -1 2.39 0.48
 -3 10 -1 3.83 0.54
 3 10 1 2.68 0.48
 3 -10 -1 3.43 0.48
 4 -10 1 19.93 1.11
 -4 -10 -1 17.75 1.01
 4 10 -1 17.66 1.17
 -4 10 1 17.62 1.14
 4 -10 -1 19.38 1.09
 -4 -10 1 18.15 1.05
 -4 10 -1 20.41 1.22
 4 10 1 18.32 1.16
 -4 10 -1 18.94 1.11
 -5 10 1 7.87 0.96
 -5 10 1 7.4 0.82
 -5 -10 -1 9.5 0.8
 5 10 -1 8.93 1.06
 -5 -10 1 8.78 0.81
 5 10 1 8.14 0.95
 -5 10 -1 9.78 0.87
 6 10 -1 1.62 0.54
 -6 -10 -1 2.08 0.53
 -6 -10 1 2.45 0.59
 6 10 1 2.14 0.6
 0 11 1 0.3 0.19
 0 -11 -1 0.36 0.18
 0 11 -1 0.75 0.26
 0 11 -1 0.55 0.2
 0 -11 1 0.29 0.2
 0 11 1 0.16 0.13
 0 11 -1 0.68 0.2
 0 11 1 0.45 0.16
 1 11 -1 9.91 0.6
 1 -11 1 9.85 0.63
 -1 -11 -1 8.63 0.52
 1 11 -1 10.11 0.67
 -1 11 1 9.23 0.62
 -1 -11 -1 10.14 0.59
 1 11 -1 9.51 0.59
 -1 11 1 9.42 0.55
 1 11 1 9.06 0.52
 1 -11 -1 9.07 0.57
 -1 -11 1 9.99 0.66
 1 11 1 10.01 0.61
 -1 11 -1 11.78 0.65
 -1 -11 1 8.83 0.58
 -1 11 -1 10.51 0.62
 -1 11 -1 10.16 0.68
 1 11 1 9.65 0.52
 2 -11 1 1.18 0.3
 -2 -11 -1 1.88 0.31
 -2 11 1 1.2 0.29
 -2 -11 -1 1.42 0.31
 -2 11 1 1.12 0.27
 2 11 -1 1.49 0.37
 -2 11 1 1.11 0.32
 -2 -11 1 2.22 0.4
 -2 11 -1 1.32 0.37
 -2 11 -1 1.02 0.3
 2 -11 -1 1.31 0.29
 -2 -11 1 1.14 0.27
 2 11 1 1.01 0.29
 3 -11 1 4.49 0.57
 3 11 -1 3.76 0.58
 -3 11 1 3.97 0.59
 -3 11 1 4.49 0.54
 -3 -11 -1 4.06 0.48
 -3 11 1 5.48 0.65
 3 -11 -1 4.34 0.53
 -3 11 -1 3.11 0.54
 -3 11 -1 3.55 0.52
 -3 -11 1 3.03 0.45
 3 11 1 3.27 0.52
 -3 11 -1 4.17 0.52
 -4 11 1 19.18 1.19
 4 -11 1 18.47 1.1
 -4 -11 -1 18.94 1.04
 -4 11 1 17.95 1.08
 4 11 -1 19.63 1.23
 -4 11 -1 19.87 1.14
 -4 11 -1 20.21 1.24
 4 -11 -1 19.59 1.11
 4 11 1 17.15 1.13
 -4 -11 1 17.57 1.05
 5 11 -1 1.11 0.48
 -5 11 1 1.5 0.51
 -5 -11 -1 1.05 0.39
 -5 -11 1 1.34 0.44
 5 11 1 1.26 0.48
 -6 -11 -1 0.46 0.37
 6 11 -1 0.35 0.43
 6 11 1 1.07 0.51
 -6 -11 1 1.49 0.49
 0 -12 1 1.18 0.3
 0 12 -1 1.49 0.28
 0 12 -1 1.04 0.31
 0 -12 -1 1.49 0.3
 0 12 1 1.32 0.24
 0 12 1 1.5 0.31
 1 -12 1 6.44 0.56
 -1 12 1 5.9 0.52
 1 12 -1 8.21 0.63
 -1 -12 -1 7.02 0.52
 1 12 -1 6.94 0.51
 -1 -12 -1 5.99 0.44
 -1 12 1 6.37 0.47
 1 12 1 6.74 0.53
 -1 -12 1 6.94 0.52
 1 12 1 6.58 0.44
 -1 12 -1 6.19 0.58
 -1 12 -1 6 0.5
 -1 -12 1 7.03 0.58
 1 -12 -1 6.41 0.5
 -2 -12 -1 10.96 0.69
 -2 -12 -1 9.83 0.62
 2 12 -1 10.93 0.79
 -2 12 1 10.78 0.75
 -2 12 1 10.6 0.67
 -2 12 1 9.76 0.66
 2 -12 1 11.04 0.73
 2 -12 -1 11.23 0.7
 2 12 1 11.21 0.73
 -2 12 -1 10.91 0.72
 -2 12 -1 9.79 0.77
 -2 -12 1 9.56 0.66
 -3 12 1 5.38 0.68
 3 -12 1 6.6 0.7
 3 12 -1 5.27 0.71
 -3 12 1 4.85 0.58
 -3 12 1 5.76 0.69
 -3 -12 -1 5.77 0.53
 -3 -12 1 4.61 0.57
 -3 12 -1 5.06 0.62
 3 -12 -1 6.26 0.58
 -3 12 -1 5.06 0.63
 -3 12 -1 5.11 0.7
 3 12 1 6 0.69
 -4 -12 -1 14.28 0.92
 4 -12 1 15.52 1.01
 4 12 -1 15.56 1.1
 -4 12 1 14.85 1.07
 -4 12 1 16.19 1.01
 -4 -12 1 15.93 0.99
 4 -12 -1 17.19 1.04
 -4 12 -1 17.15 1.13
 -4 12 -1 12.41 1.03
 4 12 1 14.38 1.02
 -5 12 1 1.32 0.45
 -5 -12 -1 1.79 0.44
 5 12 -1 1.98 0.58
 5 12 1 0.97 0.43
 -5 -12 1 1.88 0.47
 -6 -12 -1 2.32 0.57
 6 12 -1 1.49 0.57
 -6 -12 1 2.15 0.54
 6 12 1 3.32 0.74
 0 13 -1 66.35 2.16
 0 -13 1 69.86 2.33
 0 13 -1 64.63 2.26
 0 -13 -1 67.12 2.2
 0 13 1 64.22 2.15
 0 13 1 66.32 2.06
 -1 -13 -1 111.17 3.27
 -1 13 1 109.27 3.31
 1 -13 1 105.88 3.42
 1 13 -1 107.12 3.39
 1 13 -1 110.34 3.24
 -1 13 1 111.19 3.21
 1 -13 -1 114.01 3.3
 -1 13 -1 105.62 3.39
 1 13 1 102.07 3.25
 -1 13 -1 108.59 3.28
 1 13 1 109.66 3.13
 -2 13 1 1.15 0.29
 2 13 -1 0.84 0.33
 -2 -13 -1 1.17 0.29
 -2 -13 -1 1.18 0.31
 -2 13 1 0.8 0.25
 -2 13 1 1.22 0.35
 2 -13 1 1.06 0.31
 2 -13 -1 1.31 0.31
 -2 -13 1 1.19 0.3
 -2 13 -1 1.43 0.32
 -2 13 -1 1.79 0.42
 2 13 1 1.02 0.31
 -3 13 1 3.28 0.5
 -3 13 1 3.63 0.56
 -3 -13 -1 4.3 0.52
 -3 13 1 3.65 0.62
 3 13 -1 3.18 0.56
 3 -13 1 4.31 0.59
 -3 13 -1 3.84 0.56
 3 13 1 3.38 0.54
 3 -13 -1 3.99 0.54
 -3 13 -1 3.49 0.62
 -3 -13 1 3.14 0.48
 -3 13 -1 3.73 0.53
 4 13 -1 7.83 0.93
 -4 -13 -1 7.08 0.75
 -4 13 1 7.03 0.87
 -4 13 1 7.27 0.88
 4 13 1 6.58 0.82
 -4 13 -1 6.75 0.87
 -4 -13 1 7.04 0.76
 -4 13 -1 6.95 0.85
 5 13 -1 0.64 0.45
 -5 -13 -1 0.59 0.35
 -5 13 -1 0.82 0.45
 5 13 1 0.79 0.4
 -5 -13 1 0.09 0.29
 6 13 -1 7.26 1.06
 -6 -13 -1 7.34 0.87
 -6 -13 1 6.19 0.84
 6 13 1 8.26 1.09
 0 14 -1 35.69 1.4
 0 14 -1 37.11 1.53
 0 14 1 36.08 1.41
 0 14 1 35.99 1.31
 0 -14 -1 36.84 1.44
 1 14 -1 12.27 0.84
 -1 14 1 12.59 0.79
 -1 14 1 13.53 0.72
 -1 -14 -1 12.62 0.75
 1 14 -1 12.51 0.73
 1 -14 -1 12.17 0.79
 1 14 1 12.34 0.65
 -1 14 -1 12.09 0.75
 -1 14 -1 12.21 0.83
 1 14 1 12.12 0.76
 -2 14 1 34.07 1.38
 2 14 -1 30.04 1.46
 -2 14 1 34.36 1.39
 2 -14 1 34.68 1.47
 -2 -14 -1 32.09 1.31
 -2 14 1 33.09 1.48
 -2 14 -1 33.21 1.54
 -2 14 -1 34.76 1.45
 2 14 1 32.08 1.3
 -2 -14 1 30.95 1.36
 2 -14 -1 34.76 1.42
 2 14 1 33.08 1.43
 3 14 -1 7.86 0.88
 -3 14 1 8.34 0.89
 -3 14 1 7.97 0.72
 -3 14 1 8.83 0.7
 3 -14 1 9.6 0.76
 -3 -14 -1 8.41 0.65
 -3 -14 1 7.64 0.67
 -3 14 -1 9.17 0.74
 3 14 1 8.47 0.74
 -3 14 -1 7.95 0.92
 3 -14 -1 8.31 0.7
 -3 14 -1 7.95 0.71
 -4 14 1 4.86 0.76
 -4 -14 -1 5.53 0.64
 4 14 -1 5.07 0.8
 4 14 1 6.36 0.82
 -4 14 -1 6.41 0.87
 -4 -14 1 6 0.72
 -4 14 -1 5.69 0.84
 -5 14 1 0.52 0.42
 5 14 -1 0.93 0.5
 -5 -14 -1 1.88 0.45
 -5 14 -1 0.74 0.42
 5 14 1 1.56 0.54
 -5 -14 1 1.49 0.47
 0 15 1 63.09 2.18
 0 15 1 65.82 2.08
 0 15 -1 66.51 2.19
 0 15 -1 62.15 2.28
 1 15 -1 1.58 0.32
 -1 15 1 1.55 0.31
 1 15 -1 1.94 0.43
 -1 15 1 1.85 0.39
 -1 15 -1 1.63 0.41
 1 15 1 0.88 0.29
 -1 15 -1 1.07 0.29
 1 15 1 0.87 0.22
 -2 -15 -1 5.94 0.54
 2 15 -1 9.12 0.66
 -2 15 1 7.69 0.63
 -2 15 1 7.63 0.69
 2 -15 1 8.72 0.71
 2 15 -1 8.22 0.74
 -2 15 1 7.61 0.61
 2 15 1 9.16 0.58
 -2 -15 1 7.52 0.64
 2 -15 -1 8.35 0.67
 -2 15 -1 9.71 0.81
 -2 15 -1 7.38 0.64
 2 15 1 8.06 0.69
 -3 -15 -1 3.42 0.49
 3 15 -1 2.17 0.48
 -3 15 1 3.3 0.58
 -3 15 -1 3.75 0.64
 -3 -15 1 2.96 0.49
 3 15 1 2.71 0.51
 4 15 -1 8.66 1.01
 -4 -15 -1 7.56 0.72
 -4 15 1 9.05 1.04
 4 15 1 9.71 0.88
 -4 15 -1 6.55 0.89
 -4 -15 1 8.45 0.76
 5 15 -1 1.6 0.55
 -5 15 1 3.07 0.68
 -5 -15 -1 2.46 0.55
 5 15 1 2.77 0.63
 -5 15 -1 3.52 0.79
 -5 -15 1 2.42 0.54
 0 16 1 -0.08 0.15
 0 16 -1 0.31 0.26
 0 16 -1 0.33 0.22
 0 16 1 0.17 0.22
 -1 16 1 2.14 0.36
 1 16 -1 2.56 0.4
 -1 16 1 2.49 0.46
 1 16 -1 2.19 0.46
 -1 16 -1 1.77 0.36
 1 16 1 2.55 0.43
 -1 16 -1 2.26 0.46
 1 16 1 2.62 0.35
 -2 -16 -1 17.98 0.93
 -2 16 1 17.26 1.05
 2 16 -1 17.58 1.12
 2 16 1 17.85 0.87
 -2 16 -1 20.13 1.18
 -2 -16 1 18.75 1.02
 2 16 1 17.11 1.03
 2 -16 -1 20.21 1.07
 -3 -16 -1 3.15 0.48
 3 16 -1 1.7 0.49
 -3 16 1 1.58 0.45
 3 16 1 1.87 0.49
 -3 16 -1 1.72 0.49
 -3 -16 1 1.79 0.41
 -4 -16 -1 2.47 0.5
 -4 16 1 2.19 0.56
 4 16 -1 1.84 0.54
 -4 -16 1 2.59 0.53
 4 16 1 1.92 0.53
 -4 16 -1 2.76 0.63
 0 17 1 1.6 0.3
 0 17 1 0.91 0.35
 0 17 -1 0.82 0.35
 -1 17 1 7.08 0.76
 1 17 -1 6.05 0.73
 1 17 1 5.97 0.68
 1 17 1 5.65 0.48
 -1 17 -1 5.43 0.71
 -2 17 1 1.99 0.46
 2 17 -1 2.63 0.54
 -2 17 -1 2.78 0.55
 2 17 1 1.98 0.44
 -3 17 1 9.09 0.86
 3 17 -1 9.56 0.9
 -3 -17 -1 8.96 0.71
 -3 -17 1 9.99 0.8
 3 17 1 10.16 0.87
 -3 17 -1 11.9 1
 -4 -17 -1 1.06 0.35
 4 17 -1 1.96 0.58
 -4 17 1 0.56 0.42
 -4 -17 1 1.32 0.44
 4 17 1 0.72 0.38
 -4 17 -1 1.54 0.52
 0 18 -1 0.46 0.3
 0 18 1 0.35 0.28
 -1 18 1 4.14 0.61
 1 18 -1 4.05 0.65
 1 18 1 4.94 0.62
 -1 18 -1 4.6 0.67
 -2 18 1 1.86 0.46
 2 18 -1 1.7 0.46
 -2 18 -1 2.84 0.6
 2 18 1 2.06 0.47
 -3 -18 -1 2.87 0.48
 3 18 -1 3.02 0.63
 -3 18 1 2.5 0.56
 3 18 1 2.54 0.52
 -3 18 -1 1.59 0.52
 -3 -18 1 3.02 0.53
 0 19 1 0.15 0.26
 0 19 -1 0.34 0.29
 1 19 -1 10.58 0.89
 -1 19 1 10.09 0.81
 -1 19 -1 9.38 0.86
 1 19 1 9.29 0.78
 -2 19 1 9.4 0.86
 2 19 -1 10.9 0.95
 2 19 1 10.05 0.85
 -2 19 -1 11.73 0.98
 0 20 1 4.2 0.62
 0 20 -1 3.63 0.67
 -1 20 1 2.04 0.48
 1 20 -1 1.63 0.52
 1 20 1 2.07 0.48
 -1 20 -1 1.87 0.5
 0 0 -2 9.3 0.33
 0 0 -2 9.51 0.35
 0 0 2 9.34 0.35
 -1 0 2 202.15 5.19
 -1 0 -2 195.59 5.39
 1 0 -2 190.43 5.11
 1 0 -2 198.56 5.19
 1 0 2 192.11 5.08
 -1 0 2 200.07 5.11
 2 0 2 1.53 0.23
 2 0 -2 2.13 0.29
 2 0 2 1.75 0.25
 -2 0 2 2.05 0.33
 -2 0 -2 1.65 0.26
 -2 0 -2 2.05 0.31
 2 0 -2 1.62 0.31
 -2 0 2 1.36 0.24
 -3 0 -2 28.34 1.17
 3 0 2 30.22 1.18
 3 0 -2 29.34 1.2
 -3 0 2 28.98 1.31
 3 0 2 26.82 1.18
 -3 0 -2 31.06 1.3
 3 0 -2 29.89 1.32
 -3 0 2 28.04 1.18
 4 0 -2 10.44 0.84
 4 0 2 11.62 0.79
 -4 0 2 11.86 0.89
 4 0 2 12.23 0.78
 4 0 -2 11.38 0.79
 -4 0 2 11.9 0.8
 -4 0 -2 9.83 0.74
 -4 0 -2 10.57 0.83
 5 0 2 3.16 0.56
 5 0 -2 2.4 0.6
 5 0 -2 1.89 0.44
 -5 0 -2 2.8 0.53
 -5 0 2 3.05 0.56
 5 0 2 2.83 0.49
 6 0 2 21.81 1.32
 -6 0 2 19.6 1.28
 6 0 -2 20.89 1.3
 6 0 -2 18.53 1.34
 -6 0 -2 21.08 1.32
 7 0 -2 0.64 0.43
 7 0 2 0.75 0.42
 -7 0 -2 1.43 0.56
 -7 0 2 0.86 0.46
 0 -1 -2 5.28 0.22
 0 -1 -2 5.27 0.2
 0 1 2 5.29 0.2
 0 -1 2 5.66 0.26
 0 1 -2 5.46 0.29
 0 1 -2 5.35 0.26
 0 -1 2 5.36 0.28
 1 1 -2 4.37 0.33
 -1 -1 -2 5.06 0.28
 -1 -1 -2 4.29 0.25
 1 1 -2 5.03 0.31
 1 -1 2 4.66 0.29
 -1 1 2 4.34 0.31
 1 -1 -2 4.59 0.33
 1 1 2 4.97 0.26
 -1 1 -2 5.3 0.3
 -1 -1 2 4.53 0.3
 -1 -1 2 5.23 0.36
 1 -1 -2 5.11 0.3
 -2 1 2 161.84 4.42
 2 1 -2 164.74 4.44
 -2 -1 -2 160.19 4.47
 2 -1 2 163.29 4.4
 2 1 -2 156.42 4.53
 -2 -1 -2 162.22 4.38
 -2 1 2 162.52 4.54
 -2 1 -2 162.59 4.47
 2 -1 -2 161.62 4.54
 -2 -1 2 166.01 4.44
 -2 -1 2 159.22 4.53
 2 1 2 154.77 4.41
 2 -1 -2 167.33 4.43
 2 1 2 164.77 4.38
 -2 1 -2 162.52 4.41
 3 1 -2 75.6 2.58
 -3 -1 -2 77.4 2.41
 -3 1 2 79.41 2.6
 3 1 -2 77.94 2.44
 -3 1 2 76.04 2.43
 -3 -1 -2 77.97 2.55
 3 -1 2 80.25 2.43
 3 -1 2 79.08 2.41
 -3 1 -2 72.67 2.4
 3 1 2 72.47 2.44
 -3 1 -2 79.14 2.54
 3 1 2 75.27 2.38
 3 -1 -2 76.05 2.43
 -3 -1 2 73.92 2.42
 3 -1 -2 75.86 2.56
 -3 -1 2 78.41 2.59
 -4 -1 -2 8.04 0.71
 4 1 -2 7.25 0.8
 -4 1 2 7.25 0.83
 4 -1 2 7.12 0.62
 -4 1 2 8.08 0.67
 4 -1 2 8.18 0.64
 4 1 -2 7.86 0.67
 -4 -1 -2 7.31 0.64
 -4 1 -2 6.49 0.73
 4 -1 -2 7.76 0.85
 4 -1 -2 8.16 0.67
 -4 1 -2 7.56 0.65
 -4 -1 2 7.14 0.64
 -4 -1 2 8.13 0.87
 4 1 2 7.99 0.63
 4 1 2 5.86 0.66
 5 1 -2 0.23 0.29
 5 1 -2 0.52 0.4
 -5 -1 -2 0.1 0.24
 5 -1 2 0.29 0.3
 -5 1 2 -0.03 0.32
 -5 1 2 0.06 0.27
 5 -1 2 0.14 0.3
 5 -1 -2 0 0.29
 5 -1 -2 0.46 0.28
 5 1 2 0.24 0.26
 5 1 2 -0.21 0.25
 -5 -1 2 0.09 0.25
 -5 1 -2 0.39 0.3
 -6 1 2 1.91 0.52
 6 -1 2 2.71 0.55
 -6 -1 -2 1.79 0.51
 6 1 -2 1.69 0.47
 6 1 -2 1.79 0.55
 6 -1 2 1.55 0.5
 6 -1 -2 2 0.57
 -6 -1 2 2.31 0.51
 -6 1 -2 1.78 0.5
 6 1 2 1.69 0.51
 6 -1 -2 1.54 0.44
 7 1 -2 1.97 0.61
 -7 1 2 2.56 0.64
 -7 -1 -2 1.72 0.57
 -7 -1 2 3.05 0.64
 -7 1 -2 0.51 0.44
 7 1 2 1.15 0.45
 7 -1 -2 1.74 0.59
 0 -2 2 11.13 0.47
 0 2 -2 12.08 0.45
 0 2 -2 11.44 0.48
 0 -2 2 12.38 0.45
 -1 -2 -2 25.74 0.8
 -1 -2 -2 23.45 0.75
 1 2 -2 24.51 0.84
 1 -2 2 24.37 0.83
 -1 2 2 23.41 0.84
 -1 2 2 22.97 0.78
 1 2 2 24.07 0.75
 1 -2 -2 25.54 0.86
 1 -2 -2 24.17 0.8
 -1 -2 2 22.98 0.82
 -1 -2 2 24.14 0.88
 -1 2 -2 25.37 0.83
 1 2 2 23.75 0.77
 2 2 -2 15.96 0.72
 -2 -2 -2 15.58 0.67
 -2 2 2 14.3 0.77
 -2 -2 -2 16.29 0.75
 2 -2 2 16.46 0.72
 2 2 -2 14.7 0.79
 -2 2 2 15.02 0.7
 -2 2 -2 14.37 0.69
 2 2 2 14.82 0.65
 2 2 2 15.63 0.72
 -2 -2 2 16.18 0.72
 -2 2 -2 15.63 0.73
 2 -2 -2 15.48 0.78
 -2 -2 2 15.28 0.78
 2 -2 -2 14.74 0.69
 -3 -2 -2 13.67 0.76
 -3 -2 -2 15.98 0.88
 -3 2 2 13.52 0.77
 3 2 -2 16.73 0.84
 3 -2 2 15.42 0.79
 -3 2 2 15.2 0.91
 3 2 -2 14.57 0.89
 3 2 2 15.74 0.84
 -3 -2 2 13.9 0.86
 -3 -2 2 15.02 0.8
 -3 2 -2 15.27 0.86
 3 -2 -2 15.19 0.88
 3 -2 -2 16.38 0.82
 3 2 2 14.17 0.75
 -3 2 -2 14.47 0.8
 4 2 -2 16.87 0.93
 -4 -2 -2 17.74 1.06
 4 -2 2 15 0.89
 -4 2 2 15.49 0.92
 4 2 -2 12.84 0.96
 -4 2 2 14.23 0.99
 -4 -2 -2 15.59 0.89
 4 2 2 15.29 0.87
 4 -2 -2 16.01 1.02
 -4 -2 2 16.02 1.05
 4 -2 -2 16.94 0.95
 -4 2 -2 15.14 0.98
 -4 -2 2 15.21 0.92
 4 2 2 13.68 0.91
 -4 2 -2 13.49 0.88
 5 2 -2 11.63 1.01
 5 2 -2 13.07 0.92
 -5 2 2 12.33 0.92
 5 -2 2 13.36 0.93
 -5 2 2 14.74 1.09
 -5 -2 -2 13.86 0.96
 -5 -2 2 12.09 0.93
 5 -2 -2 11.76 0.89
 5 -2 -2 12.84 1.02
 -5 2 -2 12.98 0.96
 5 2 2 12.75 0.97
 5 2 2 14.36 0.94
 -6 2 2 8.98 1
 -6 -2 -2 9.2 1
 6 2 -2 10 1.13
 6 2 -2 11.85 0.96
 6 -2 2 11.82 0.95
 6 -2 -2 10.38 0.92
 6 2 2 10.24 0.95
 6 -2 -2 8.74 1.03
 -6 -2 2 10.41 0.95
 -6 2 -2 10.4 0.93
 7 2 -2 0.73 0.5
 -7 2 2 0.62 0.43
 -7 -2 -2 1.41 0.54
 -7 2 -2 1.19 0.49
 7 -2 -2 0.89 0.5
 -7 -2 2 1.53 0.53
 7 2 2 0.84 0.42
 0 -3 2 126.22 3.42
 0 3 -2 131.7 3.43
 0 3 -2 120.44 3.41
 0 3 -2 132.51 3.38
 0 -3 2 124.19 3.37
 -1 -3 -2 72.73 2.05
 -1 3 2 79 2.18
 1 3 -2 73.43 2.16
 -1 3 2 77.74 2.11
 1 3 -2 72.26 2.23
 -1 -3 -2 77.87 2.11
 1 -3 2 74.65 2.16
 -1 3 -2 74.9 2.17
 1 -3 -2 77.19 2.16
 1 -3 -2 77.28 2.11
 1 3 2 76.32 2.09
 -1 -3 2 80.25 2.25
 1 3 2 78.13 2.05
 -1 -3 2 75.44 2.17
 -1 3 -2 77.85 2.24
 2 -3 2 3.17 0.35
 -2 3 2 2.18 0.34
 -2 3 2 2.47 0.3
 -2 -3 -2 3.22 0.33
 -2 -3 -2 2.56 0.35
 2 3 -2 2.51 0.31
 2 3 -2 1.98 0.34
 2 -3 -2 3.02 0.38
 -2 -3 2 2.81 0.35
 -2 -3 2 3.12 0.39
 -2 3 -2 2.35 0.31
 2 3 2 2.53 0.28
 2 -3 -2 2.92 0.34
 2 3 2 2.53 0.33
 3 -3 2 8.68 0.6
 -3 3 2 7.66 0.64
 -3 -3 -2 7.79 0.55
 -3 -3 -2 9.28 0.66
 -3 3 2 7.5 0.56
 3 3 -2 8.08 0.57
 3 3 -2 8.08 0.67
 3 3 2 7.14 0.52
 -3 3 -2 8.11 0.59
 -3 -3 2 9.75 0.69
 3 -3 -2 8.75 0.6
 3 -3 -2 6.96 0.62
 3 3 2 8.16 0.6
 -3 3 -2 7.57 0.63
 -3 -3 2 8.04 0.58
 4 -3 2 5.42 0.63
 -4 -3 -2 5.21 0.58
 4 3 -2 6.4 0.6
 -4 -3 -2 6.87 0.77
 -4 3 2 5.86 0.74
 -4 3 2 4.87 0.58
 4 3 -2 6.32 0.76
 -4 -3 2 5.69 0.72
 -4 3 -2 7.02 0.73
 4 3 2 5.62 0.66
 -4 -3 2 6.5 0.69
 4 -3 -2 4.97 0.57
 4 -3 -2 6.62 0.75
 4 3 2 5.79 0.61
 -4 3 -2 6.55 0.75
 -5 3 2 0.78 0.35
 -5 -3 -2 1.51 0.4
 5 3 -2 1.54 0.51
 -5 3 2 1.57 0.52
 5 3 -2 0.92 0.37
 5 -3 2 1.59 0.41
 5 -3 -2 0.92 0.36
 5 3 2 1.6 0.47
 5 -3 -2 1.32 0.43
 5 3 2 1.66 0.44
 -5 -3 2 1.42 0.44
 -5 3 -2 0.94 0.34
 -6 -3 -2 3.82 0.67
 6 -3 2 5.49 0.77
 6 3 -2 5.44 0.92
 -6 3 2 4.72 0.71
 6 3 2 5.13 0.78
 6 -3 -2 4.88 0.72
 -6 3 -2 5.13 0.75
 -6 -3 2 4.59 0.69
 6 -3 -2 3.96 0.75
 7 3 -2 0.06 0.36
 -7 3 2 0.15 0.35
 -7 -3 -2 0.25 0.37
 -7 3 -2 0.47 0.4
 -7 -3 2 0.84 0.43
 7 -3 -2 1.14 0.5
 7 3 2 0.81 0.42
 0 -4 -2 76.74 1.97
 0 4 2 76.97 1.95
 0 4 2 76.12 1.97
 0 4 -2 74.68 2.19
 0 -4 2 77.39 2.19
 0 4 2 76.18 1.95
 0 4 -2 74.12 2.13
 1 4 -2 10.96 0.59
 -1 4 2 12.06 0.53
 1 -4 2 10.73 0.53
 -1 4 2 11.9 0.49
 1 4 -2 12.1 0.55
 -1 -4 -2 10.74 0.43
 -1 -4 -2 12.07 0.48
 -1 4 -2 11.98 0.6
 -1 -4 2 11.43 0.59
 1 4 2 10.97 0.47
 1 -4 -2 11.14 0.48
 1 4 2 11.97 0.43
 -1 4 -2 12.04 0.55
 -1 -4 2 11.57 0.54
 1 -4 -2 11.17 0.48
 -2 -4 -2 26.98 0.98
 -2 -4 -2 27.4 1.06
 2 4 -2 27.01 1.14
 -2 4 2 27.74 1.12
 2 -4 2 28.76 1.07
 2 4 -2 28.43 1.07
 -2 4 -2 26.73 1.06
 2 -4 -2 26.92 1.07
 2 4 2 26.95 1.05
 2 4 2 27.82 0.97
 -2 -4 2 28.89 1.07
 -2 -4 2 26.88 1.13
 2 -4 -2 27.13 1.02
 -3 4 2 10.96 0.78
 3 4 -2 10.73 0.69
 -3 4 2 10.7 0.68
 3 4 -2 11.57 0.78
 -3 -4 -2 11.79 0.67
 -3 -4 -2 12.74 0.77
 3 -4 2 10.64 0.69
 -3 -4 2 11.2 0.69
 -3 4 -2 9.81 0.68
 -3 -4 2 10.75 0.75
 -3 4 -2 12.58 0.77
 3 -4 -2 10.39 0.72
 3 4 2 12.27 0.66
 3 -4 -2 12.15 0.7
 3 4 2 10.71 0.71
 4 -4 2 9.28 0.71
 -4 4 2 7.69 0.66
 -4 -4 -2 8.17 0.66
 4 4 -2 8.03 0.66
 -4 -4 -2 8.5 0.76
 4 4 -2 8.59 0.8
 -4 4 2 9.41 0.8
 4 4 2 9.01 0.66
 -4 -4 2 8.83 0.76
 4 -4 -2 9.18 0.7
 -4 -4 2 8.45 0.69
 -4 4 -2 7.11 0.79
 4 4 2 7.41 0.68
 4 -4 -2 9 0.74
 -4 4 -2 7.77 0.68
 5 4 -2 2.57 0.48
 5 4 -2 2.58 0.61
 -5 -4 -2 4.19 0.63
 5 -4 2 4.16 0.61
 -5 4 2 4.98 0.78
 -5 4 2 3.9 0.62
 -5 -4 2 4.46 0.64
 5 -4 -2 2.83 0.5
 -5 4 -2 3.18 0.57
 5 4 2 3.09 0.59
 5 -4 -2 2.4 0.53
 6 4 -2 7.73 1.03
 6 -4 2 9.58 0.88
 -6 -4 -2 7.64 0.9
 -6 4 2 8.47 0.94
 -6 4 -2 8.66 1.02
 6 4 2 6.97 0.91
 6 -4 -2 9.48 1.08
 6 -4 -2 8.57 0.95
 -6 -4 2 6.87 0.84
 7 4 -2 0.41 0.39
 -7 -4 -2 0.21 0.4
 -7 4 -2 0.15 0.35
 7 4 2 0.24 0.37
 -7 -4 2 0.51 0.41
 7 -4 -2 0.98 0.44
 0 -5 -2 13.65 0.45
 0 -5 2 14.88 0.65
 0 5 2 13.59 0.43
 0 -5 -2 13.56 0.47
 0 5 2 13.73 0.44
 0 5 -2 13.86 0.59
 0 5 -2 13.87 0.64
 0 5 2 13.49 0.46
 -1 -5 -2 82.85 2.23
 -1 -5 -2 79.24 2.18
 1 -5 2 80.53 2.34
 -1 5 2 79.25 2.29
 1 5 -2 77.11 2.4
 -1 5 2 79.66 2.25
 1 5 -2 82.37 2.34
 1 -5 -2 80.54 2.25
 -1 5 -2 80.48 2.35
 -1 -5 2 82.57 2.4
 -1 -5 2 81.68 2.34
 1 5 2 82.84 2.18
 1 5 2 81.06 2.23
 -1 5 -2 81.41 2.44
 -2 -5 -2 0.69 0.21
 -2 5 2 0.58 0.19
 2 5 -2 0.21 0.21
 -2 -5 -2 0.81 0.19
 -2 5 2 0.45 0.21
 2 5 -2 0.48 0.19
 2 -5 2 0.8 0.24
 -2 -5 2 0.67 0.2
 -2 -5 2 0.41 0.23
 2 -5 -2 0.56 0.2
 -2 5 -2 0.36 0.17
 2 5 2 0.48 0.16
 2 5 2 0.36 0.19
 2 -5 -2 0.94 0.23
 3 5 -2 2.23 0.37
 3 5 -2 1.22 0.35
 -3 -5 -2 1.26 0.28
 3 -5 2 1.91 0.36
 -3 -5 -2 2.07 0.38
 -3 5 2 1.68 0.39
 -3 5 2 1.66 0.33
 3 -5 -2 1.18 0.31
 -3 5 -2 1.49 0.33
 -3 5 -2 2.06 0.4
 -3 -5 2 1.12 0.28
 3 5 2 1.61 0.28
 3 -5 -2 1.33 0.29
 3 5 2 1.1 0.31
 -3 -5 2 1.69 0.36
 -4 -5 -2 2.3 0.46
 -4 5 2 1.5 0.35
 4 5 -2 1.91 0.47
 -4 -5 -2 1.68 0.36
 -4 5 2 2.53 0.55
 4 5 -2 2.42 0.44
 4 -5 2 2.16 0.42
 -4 5 -2 1.91 0.44
 4 5 2 2.08 0.38
 -4 -5 2 2.4 0.5
 -4 -5 2 2.82 0.49
 4 5 2 1.85 0.41
 4 -5 -2 2.41 0.43
 4 -5 -2 1.41 0.38
 -4 5 -2 2.65 0.47
 -5 -5 -2 30.35 1.44
 -5 5 2 30.36 1.67
 -5 5 2 29.86 1.47
 5 5 -2 28.93 1.63
 5 -5 2 27.82 1.43
 -5 5 -2 28.48 1.46
 5 -5 -2 29.62 1.5
 5 -5 -2 30.4 1.48
 -5 -5 2 27.66 1.43
 5 5 2 27.89 1.5
 6 -5 2 4.08 0.65
 -6 5 2 5.74 0.79
 6 5 -2 5.52 0.91
 -6 -5 -2 3.99 0.65
 6 -5 -2 5.19 0.72
 -6 5 -2 5.76 0.82
 6 -5 -2 5.33 0.82
 6 5 2 4.89 0.76
 -6 -5 2 4.54 0.7
 -7 -5 -2 0.23 0.4
 7 5 -2 0.33 0.42
 7 5 2 2.15 0.6
 -7 -5 2 0.05 0.38
 7 -5 -2 -0.23 0.31
 -7 5 -2 0.72 0.4
 0 6 2 68.67 1.81
 0 6 2 65.19 1.84
 0 -6 -2 68.64 1.84
 0 6 2 66.92 1.81
 0 6 -2 69.61 2
 0 -6 -2 67.2 1.86
 0 -6 2 69.26 2.06
 0 6 -2 63.14 2.03
 -1 -6 -2 41.76 1.22
 1 6 -2 40.59 1.43
 1 -6 2 41.55 1.38
 -1 6 2 40.71 1.3
 -1 -6 -2 40.93 1.25
 -1 6 2 41.49 1.27
 1 6 -2 42.11 1.37
 1 -6 2 40.87 1.45
 -1 6 -2 42.22 1.46
 -1 -6 2 39.69 1.35
 -1 -6 2 41.72 1.43
 1 6 2 41.01 1.26
 1 6 2 41.51 1.21
 1 -6 -2 42.43 1.28
 -2 6 2 18.64 0.8
 2 6 -2 19.44 0.85
 2 -6 2 18.62 0.84
 -2 -6 -2 16.22 0.72
 -2 -6 -2 18.06 0.81
 -2 6 2 18.28 0.87
 2 6 -2 16.83 0.9
 -2 -6 2 16.9 0.81
 2 6 2 18.58 0.73
 2 -6 -2 18.15 0.79
 -2 6 -2 18.23 0.84
 2 6 2 17.42 0.81
 -2 -6 2 18.66 0.9
 -3 -6 -2 8.46 0.58
 -3 -6 -2 9.57 0.67
 3 6 -2 8.82 0.63
 3 6 -2 7.98 0.7
 -3 6 2 9.59 0.73
 3 -6 2 10.61 0.68
 3 -6 -2 9.61 0.65
 -3 -6 2 8.31 0.62
 3 6 2 9.52 0.67
 -3 -6 2 10.13 0.72
 3 -6 -2 9.37 0.63
 -3 6 -2 9.46 0.66
 -3 6 -2 9.83 0.69
 3 6 2 10.38 0.61
 -4 6 2 3.26 0.58
 4 6 -2 2.51 0.45
 -4 6 2 2.28 0.42
 -4 -6 -2 3.19 0.53
 -4 -6 -2 2.7 0.44
 4 -6 2 2.82 0.48
 4 6 -2 2.84 0.56
 4 -6 -2 2.47 0.48
 -4 6 -2 2.36 0.45
 -4 -6 2 2.21 0.45
 -4 -6 2 1.38 0.39
 4 -6 -2 2.23 0.42
 -4 6 -2 3.62 0.6
 4 6 2 3.18 0.53
 5 -6 2 31.11 1.51
 5 6 -2 29.2 1.62
 -5 -6 -2 28.65 1.42
 -5 6 2 30.5 1.48
 -5 6 2 29.29 1.63
 -5 6 -2 27.75 1.46
 5 -6 -2 28.64 1.44
 5 -6 -2 30.67 1.49
 -5 -6 2 27.06 1.43
 5 6 2 25.41 1.46
 6 -6 2 1.68 0.47
 -6 6 2 2.69 0.56
 6 6 -2 1.43 0.56
 -6 -6 -2 2.23 0.53
 -6 -6 2 2.71 0.58
 6 6 2 1.94 0.56
 -6 6 -2 2.16 0.52
 6 -6 -2 1.81 0.54
 -7 -6 -2 5.37 0.86
 7 6 -2 3.33 0.76
 7 6 2 3.88 0.76
 -7 -6 2 4.31 0.78
 0 7 -2 20.86 0.82
 0 7 -2 20.96 0.83
 0 7 2 20.4 0.66
 0 -7 2 19.3 0.85
 0 7 -2 19.75 0.86
 0 7 2 19.41 0.69
 0 7 2 20.68 0.66
 0 -7 -2 19.36 0.7
 -1 -7 -2 34.36 1.08
 1 -7 2 36.28 1.26
 1 7 -2 37.55 1.25
 -1 7 2 34.05 1.13
 -1 -7 -2 34.85 1.11
 -1 7 2 35.66 1.15
 1 -7 2 35.21 1.31
 -1 7 2 34.31 1.18
 1 7 -2 35.08 1.3
 -1 -7 2 32.59 1.21
 1 7 2 36.55 1.07
 -1 7 -2 33.27 1.3
 1 -7 -2 34.6 1.14
 -1 -7 2 36.69 1.31
 1 7 2 34.13 1.13
 -2 -7 -2 45.29 1.47
 -2 -7 -2 46.42 1.55
 2 7 -2 47.3 1.6
 -2 7 2 46.29 1.63
 2 -7 2 46.24 1.61
 2 7 -2 47.09 1.72
 -2 7 2 45.39 1.54
 -2 -7 2 48.15 1.7
 -2 7 -2 43.32 1.69
 2 7 2 48.41 1.48
 -2 7 -2 44.32 1.61
 2 -7 -2 46.74 1.55
 2 7 2 42.76 1.54
 -2 -7 2 45.6 1.59
 -3 7 2 36.06 1.5
 -3 -7 -2 38.08 1.46
 3 -7 2 34.86 1.4
 3 7 -2 30.98 1.48
 3 7 -2 35.52 1.4
 -3 -7 -2 32.17 1.28
 3 7 2 33.25 1.41
 -3 -7 2 30.65 1.35
 -3 7 -2 36.31 1.45
 -3 7 -2 35.56 1.44
 3 7 2 36.05 1.31
 3 -7 -2 30.24 1.32
 -3 -7 2 36.02 1.51
 -4 7 2 27.43 1.44
 4 7 -2 24.82 1.39
 4 7 -2 29.06 1.32
 -4 -7 -2 24.98 1.2
 4 -7 2 26.28 1.29
 -4 7 2 25.86 1.27
 -4 7 -2 26.73 1.41
 4 7 2 27.49 1.35
 -4 7 -2 25.72 1.3
 -4 -7 2 24.88 1.25
 4 -7 -2 27.01 1.28
 -5 7 2 10.54 0.96
 -5 7 2 9.28 0.81
 5 7 -2 9.36 1.08
 -5 -7 -2 8.52 0.77
 5 -7 2 10.3 0.84
 -5 7 -2 10.95 0.89
 5 7 2 10.06 0.89
 5 -7 -2 10.74 0.87
 -5 -7 2 9.6 0.83
 6 7 -2 2.55 0.64
 -6 7 2 2.29 0.58
 -6 -7 -2 1.6 0.46
 6 7 2 2.4 0.62
 -6 7 -2 2.29 0.59
 -6 -7 2 2.69 0.59
 -7 -7 -2 0.25 0.39
 7 7 -2 0.92 0.52
 7 7 2 -0.21 0.34
 -7 -7 2 0.21 0.37
 0 8 -2 8.37 0.5
 0 8 2 8.22 0.37
 0 -8 2 8.64 0.55
 0 8 -2 7.31 0.48
 0 8 2 7.71 0.4
 0 -8 -2 7.34 0.41
 0 8 -2 8.15 0.54
 0 8 2 8.05 0.37
 1 -8 2 105.65 3.05
 -1 -8 -2 104.56 2.79
 -1 -8 -2 97.94 2.73
 1 -8 2 99.82 2.94
 -1 8 2 96.47 2.78
 1 8 -2 101.41 2.92
 1 8 -2 94.94 2.99
 -1 8 2 99.22 2.87
 -1 8 -2 98.57 2.92
 -1 -8 2 95.69 2.89
 1 -8 -2 102.77 2.81
 -1 -8 2 105.75 3.02
 1 8 2 97.91 2.79
 1 8 2 102.51 2.72
 -1 8 -2 95.73 3.01
 2 -8 2 1.01 0.28
 2 8 -2 1.18 0.25
 2 8 -2 1.58 0.36
 -2 8 2 1.23 0.26
 -2 -8 -2 0.97 0.21
 -2 -8 -2 0.92 0.23
 -2 8 2 1.22 0.28
 2 8 2 0.9 0.2
 2 -8 -2 1.1 0.25
 -2 8 -2 1.35 0.34
 -2 8 -2 1.29 0.29
 -2 -8 2 1.3 0.3
 2 8 2 0.96 0.24
 -2 -8 2 1.12 0.26
 -3 -8 -2 53.32 1.87
 -3 8 2 58.38 2.11
 -3 8 2 56.22 1.97
 -3 -8 -2 57.15 2.01
 3 8 -2 50.63 2.08
 3 -8 2 55.71 2.01
 3 8 -2 61.01 2.04
 3 8 2 52.78 1.99
 3 -8 -2 57.25 1.98
 3 8 2 58.82 1.9
 -3 8 -2 57.98 2.05
 -3 8 -2 60.31 2.06
 -3 -8 2 57.93 2.13
 -3 -8 2 54.56 1.98
 4 8 -2 28.35 1.5
 -4 8 2 29.28 1.5
 4 -8 2 26.58 1.33
 -4 8 2 29.95 1.37
 -4 -8 -2 28.22 1.28
 -4 8 -2 28.78 1.38
 -4 8 -2 30.65 1.51
 -4 -8 2 28.25 1.35
 4 8 2 26.41 1.37
 4 -8 -2 29.37 1.35
 -5 8 2 6.37 0.75
 -5 8 2 6.56 0.9
 5 -8 2 7.89 0.87
 5 8 -2 6.79 0.93
 -5 -8 -2 7.74 0.73
 5 8 2 7.47 0.88
 5 -8 -2 8.18 0.87
 -5 8 -2 7.98 0.91
 -5 -8 2 4.63 0.65
 -6 -8 -2 1.16 0.41
 6 8 -2 1.85 0.64
 -6 -8 2 0.84 0.42
 -6 8 -2 3.39 0.65
 6 8 2 1.93 0.53
 -7 -8 -2 13.82 1.14
 7 8 -2 12.17 1.48
 7 8 2 12.51 1.16
 -7 -8 2 12.52 1.14
 0 9 2 116.17 3.23
 0 9 2 119.86 3.17
 0 9 2 116.97 3.16
 0 -9 2 118.78 3.46
 0 9 -2 116.49 3.45
 0 9 -2 121.9 3.38
 0 -9 -2 115.91 3.25
 0 9 -2 114.72 3.36
 -1 -9 -2 67.24 1.95
 1 9 -2 61.01 2.14
 1 9 -2 68.27 2.08
 -1 9 2 64.41 2.02
 1 -9 2 68.26 2.2
 1 -9 2 64.75 2.09
 -1 9 2 65.86 1.95
 -1 -9 -2 63.71 1.89
 1 9 2 62.54 1.95
 -1 -9 2 67.25 2.15
 1 9 2 66.6 1.88
 -1 9 -2 63.49 2.08
 -1 -9 2 63.63 2.05
 1 9 2 66.75 1.89
 -1 9 -2 63.62 2.16
 1 -9 -2 66.25 1.97
 -2 -9 -2 6.25 0.43
 -2 9 2 6.13 0.47
 2 9 -2 6.6 0.6
 -2 -9 -2 7.48 0.51
 -2 9 2 6.67 0.53
 2 9 -2 7.21 0.53
 2 -9 2 6.64 0.54
 -2 -9 2 6.1 0.51
 2 9 2 6.72 0.44
 -2 -9 2 7.52 0.59
 2 -9 -2 6.31 0.48
 -2 9 -2 6.3 0.68
 2 9 2 6.47 0.5
 -3 -9 -2 11.48 0.68
 -3 9 2 12.66 0.83
 3 9 -2 12.71 0.78
 3 -9 2 12.38 0.79
 3 9 -2 11.93 0.87
 -3 -9 -2 11.65 0.75
 -3 9 2 12.04 0.74
 -3 9 -2 11.92 0.79
 -3 -9 2 14.41 0.9
 -3 -9 2 12.22 0.77
 3 9 2 11.06 0.77
 -3 9 -2 12.36 0.88
 3 -9 -2 12.22 0.76
 4 9 -2 26.85 1.49
 -4 -9 -2 29.04 1.31
 -4 9 2 28.5 1.51
 4 -9 2 30.36 1.42
 -4 9 -2 30.74 1.45
 4 -9 -2 30.89 1.4
 -4 9 -2 31.69 1.55
 4 9 2 28.6 1.43
 -4 -9 2 27.61 1.36
 -5 9 2 2.96 0.61
 5 9 -2 4.38 0.76
 -5 -9 -2 3.39 0.54
 -5 9 2 3.39 0.55
 5 -9 2 4.53 0.67
 -5 9 -2 3.22 0.61
 -5 -9 2 5.84 0.76
 5 9 2 4.6 0.71
 5 -9 -2 5.35 0.71
 -6 -9 -2 1.34 0.42
 6 9 -2 2.36 0.65
 -6 -9 2 2.25 0.53
 6 9 2 2.52 0.59
 -7 -9 -2 1.25 0.5
 7 9 -2 1.93 0.73
 7 9 2 1.12 0.51
 -7 -9 2 0.85 0.43
 0 10 -2 17.19 0.82
 0 10 2 17.48 0.67
 0 -10 2 18.48 0.91
 0 10 -2 17.58 0.82
 0 10 -2 19.32 0.92
 0 10 2 17.66 0.68
 0 10 2 16.6 0.72
 0 -10 -2 17.62 0.75
 1 -10 2 17.64 0.92
 -1 -10 -2 17.35 0.7
 1 -10 2 17.55 0.86
 -1 10 2 16.78 0.73
 -1 -10 -2 18.43 0.75
 1 10 -2 18.94 0.86
 1 10 -2 16.53 0.89
 -1 10 2 16.94 0.79
 1 -10 -2 17.06 0.75
 -1 -10 2 17.54 0.83
 -1 -10 2 17.92 0.89
 1 10 2 16.55 0.66
 -1 10 -2 16.56 0.83
 -1 10 -2 17.45 0.92
 1 10 2 17.29 0.68
 1 10 2 17.24 0.75
 -2 10 2 17.02 0.82
 2 -10 2 16.34 0.89
 2 10 -2 17.15 0.97
 -2 10 2 18.49 0.92
 -2 -10 -2 17.61 0.82
 -2 10 2 17.53 0.89
 -2 -10 -2 16.76 0.76
 2 10 -2 18.71 0.9
 2 -10 -2 16.59 0.83
 -2 -10 2 16.16 0.86
 -2 -10 2 20.06 0.99
 2 10 2 17.99 0.86
 2 10 2 18.28 0.77
 -2 10 -2 17.74 1.01
 -2 10 -2 14.63 0.84
 3 10 -2 3.85 0.6
 3 -10 2 5.8 0.63
 -3 10 2 5.34 0.66
 -3 -10 -2 4.92 0.47
 -3 -10 -2 5.19 0.57
 -3 10 2 5.09 0.56
 -3 10 -2 4.59 0.58
 -3 -10 2 4.66 0.56
 -3 10 -2 4.77 0.65
 3 -10 -2 4.68 0.53
 3 10 2 3.86 0.53
 4 -10 2 9.18 0.77
 4 10 -2 8.14 0.93
 -4 -10 -2 8.89 0.69
 -4 10 2 9.55 0.83
 -4 10 2 8.74 0.73
 4 -10 -2 9.93 0.78
 -4 10 -2 9.27 0.78
 -4 -10 2 8.97 0.76
 -4 10 -2 10.02 0.85
 4 10 2 9.84 0.82
 -5 10 2 3.01 0.65
 -5 10 2 2.42 0.5
 5 10 -2 1.19 0.48
 -5 -10 -2 2.96 0.51
 -5 10 -2 1.54 0.46
 -5 -10 2 1.76 0.45
 5 10 2 2.13 0.53
 6 10 -2 1.87 0.62
 -6 -10 -2 2.64 0.56
 -6 -10 2 2.96 0.62
 6 10 2 3.04 0.63
 0 11 2 29.99 1.11
 0 11 2 29.99 1.04
 0 11 -2 30.22 1.29
 0 -11 2 29.28 1.28
 0 11 2 32.74 1.06
 0 11 -2 32.62 1.24
 0 -11 -2 30.18 1.13
 0 11 -2 30.1 1.2
 1 -11 2 0.59 0.25
 -1 -11 -2 0.89 0.21
 -1 -11 -2 0.83 0.18
 1 -11 2 0.31 0.22
 1 11 -2 0.58 0.25
 -1 11 2 0.59 0.23
 -1 11 2 0.78 0.19
 1 11 -2 0.79 0.25
 1 11 -2 0.57 0.22
 1 11 2 0.36 0.18
 -1 -11 2 0.36 0.22
 -1 11 -2 0.25 0.23
 -1 11 -2 0.76 0.24
 -1 -11 2 0.72 0.23
 1 11 2 0.83 0.17
 -1 11 -2 0.54 0.21
 1 11 2 0.51 0.15
 1 -11 -2 0.57 0.2
 2 -11 2 8.62 0.65
 -2 -11 -2 8.93 0.54
 -2 -11 -2 9.58 0.6
 2 11 -2 10.03 0.76
 -2 11 2 9.32 0.63
 -2 11 2 9.35 0.6
 -2 11 2 9.2 0.68
 2 -11 -2 10.16 0.63
 -2 -11 2 9.08 0.64
 2 11 2 8.14 0.61
 -2 -11 2 10.78 0.73
 -2 11 -2 7.56 0.7
 -2 11 -2 9.9 0.68
 -3 11 2 3.87 0.57
 -3 -11 -2 4.56 0.51
 3 -11 2 3.73 0.52
 -3 -11 -2 4.39 0.55
 3 11 -2 3.92 0.61
 -3 11 2 4.45 0.52
 3 -11 -2 4.07 0.52
 -3 -11 2 3.74 0.5
 -3 11 -2 3.27 0.59
 3 11 2 3.84 0.53
 -4 11 2 24.09 1.37
 -4 -11 -2 24.5 1.19
 4 11 -2 24.39 1.43
 4 -11 2 23.32 1.27
 -4 11 2 24.81 1.26
 -4 11 -2 24.94 1.41
 -4 11 -2 23.79 1.3
 4 11 2 24.72 1.33
 -4 -11 2 25.14 1.29
 4 -11 -2 26.34 1.29
 -4 11 -2 23.48 1.37
 5 11 -2 4.31 0.78
 -5 -11 -2 5.26 0.67
 -5 11 2 4.11 0.7
 -5 -11 2 4.54 0.72
 5 11 2 4.81 0.76
 6 11 -2 -0.17 0.29
 -6 -11 -2 0.18 0.29
 -6 -11 2 0.57 0.38
 6 11 2 -0.14 0.3
 0 -12 2 0.35 0.23
 0 12 2 0.23 0.13
 0 12 2 0.2 0.16
 0 12 -2 0.11 0.23
 0 12 -2 -0.01 0.15
 0 -12 -2 -0.2 0.12
 1 12 -2 19.61 1.04
 1 12 -2 20.03 0.95
 1 -12 2 18.74 1.02
 1 -12 2 20.39 1.05
 -1 12 2 19.68 0.92
 -1 12 2 19.45 0.84
 -1 -12 -2 19.57 0.86
 -1 12 -2 20.02 1.06
 -1 -12 2 18.16 0.92
 1 -12 -2 18.91 0.87
 -1 -12 2 20.82 1.03
 -1 12 -2 20.09 0.97
 1 12 2 19.71 0.88
 1 12 2 20.37 0.78
 2 12 -2 1.18 0.38
 -2 12 2 2.13 0.35
 -2 12 2 2.15 0.38
 -2 12 2 1.74 0.37
 2 -12 2 1.7 0.37
 -2 -12 -2 2.06 0.34
 -2 -12 -2 2.43 0.34
 2 -12 -2 2.08 0.36
 2 12 2 2.41 0.38
 -2 12 -2 2.05 0.4
 -2 12 -2 2.08 0.44
 -2 -12 2 2.24 0.38
 -3 -12 -2 34.74 1.39
 3 -12 2 36.54 1.56
 -3 12 2 35.96 1.59
 -3 12 2 34.37 1.46
 3 12 -2 31.04 1.59
 -3 12 2 34.79 1.55
 -3 -12 2 33.9 1.49
 -3 12 -2 38.2 1.72
 3 12 2 36.83 1.53
 3 -12 -2 36.09 1.49
 -4 12 2 9.56 0.77
 4 12 -2 7.22 0.89
 4 -12 2 9.47 0.81
 -4 12 2 9.06 0.98
 -4 -12 -2 8.57 0.7
 -4 12 -2 9.88 0.89
 4 -12 -2 9.46 0.77
 -4 12 -2 8.76 0.79
 -4 12 -2 9.47 0.84
 -4 -12 2 8.85 0.78
 4 12 2 9.54 0.82
 -5 -12 -2 9.9 0.82
 5 12 -2 9.93 1.18
 -5 -12 2 6.11 0.78
 5 12 2 9.78 0.92
 -5 12 -2 8 1.06
 6 12 -2 0.68 0.55
 -6 -12 -2 0.55 0.39
 -6 -12 2 1.28 0.47
 6 12 2 1.24 0.46
 0 13 2 19.61 0.89
 0 13 -2 20.37 1.07
 0 13 2 21.82 0.84
 0 13 -2 20.76 0.98
 0 -13 -2 20.46 0.92
 -1 -13 -2 110.81 3.17
 1 13 -2 108.39 3.25
 -1 13 2 109.3 3.11
 1 13 -2 104.39 3.39
 -1 13 2 106.35 3.21
 -1 13 -2 106.5 3.28
 1 13 2 105.56 3.15
 -1 13 -2 101.29 3.38
 1 -13 -2 106.87 3.17
 1 13 2 107.3 3.01
 -2 -13 -2 5.88 0.48
 -2 13 2 6.75 0.53
 -2 13 2 5.77 0.53
 -2 -13 -2 6.06 0.51
 2 13 -2 5.55 0.68
 2 -13 2 5.69 0.64
 -2 13 2 6.5 0.67
 -2 13 -2 5.53 0.63
 2 13 2 6.26 0.55
 -2 13 -2 5.04 0.65
 2 -13 -2 5.32 0.5
 -2 -13 2 4.97 0.57
 3 13 -2 6.85 0.83
 -3 13 2 7.21 0.79
 -3 13 2 6.72 0.64
 -3 -13 -2 5.59 0.53
 -3 13 2 6.26 0.58
 3 -13 2 6.6 0.72
 -3 13 -2 5.88 0.77
 3 13 2 6.23 0.69
 -3 -13 2 5.82 0.68
 3 -13 -2 6.23 0.59
 -3 13 -2 5.8 0.67
 -4 -13 -2 20.43 1.09
 4 13 -2 21.38 1.38
 -4 13 2 21.59 1.3
 4 13 2 20.33 1.22
 -4 -13 2 19.43 1.16
 -4 13 -2 23.52 1.36
 -4 13 -2 19.08 1.3
 5 13 -2 4.31 0.8
 -5 -13 -2 4.58 0.65
 -5 13 -2 3.94 0.75
 5 13 2 5.34 0.8
 -5 -13 2 3.77 0.63
 -6 -13 -2 -0.31 0.26
 6 13 -2 0.79 0.47
 -6 -13 2 0.31 0.37
 -6 13 -2 -0.02 0.39
 6 13 2 0.17 0.38
 0 14 -2 33.22 1.47
 0 14 2 31.49 1.25
 0 14 -2 33.78 1.37
 0 14 2 33.3 1.18
 1 14 -2 16.56 0.99
 1 14 -2 15.6 0.85
 -1 -14 -2 14.17 0.77
 -1 14 2 15.68 0.84
 -1 14 2 14.39 0.74
 1 14 2 13.95 0.78
 1 -14 -2 14.31 0.82
 -1 14 -2 16.3 0.89
 -1 14 -2 15.1 0.96
 1 14 2 16.09 0.7
 -2 14 2 14.8 0.84
 2 14 -2 15.11 1
 -2 14 2 13.28 0.77
 -2 14 2 14.82 0.89
 2 -14 2 13.42 0.88
 -2 -14 -2 12.41 0.71
 2 14 2 12.92 0.8
 -2 -14 2 13.07 0.83
 2 14 2 14.05 0.69
 2 -14 -2 13.7 0.82
 -2 14 -2 13.09 0.86
 -2 14 -2 12.69 0.93
 -3 -14 -2 6.73 0.57
 3 -14 2 7.4 0.69
 -3 14 2 6.39 0.76
 -3 14 2 6.86 0.62
 -3 14 2 6.61 0.75
 3 14 -2 6.87 0.85
 3 -14 -2 6.53 0.62
 3 14 2 6.67 0.74
 -3 14 -2 7.87 0.7
 -3 14 -2 7.85 0.92
 -3 -14 2 8.08 0.8
 -4 14 2 13.96 1.06
 4 14 -2 12.7 1.1
 -4 -14 -2 12.4 0.86
 -4 14 -2 13.51 1.04
 4 14 2 14.02 1
 -4 14 -2 13.42 1.11
 -4 -14 2 12.12 0.93
 5 14 -2 0.83 0.5
 -5 -14 -2 1.64 0.45
 -5 14 -2 1.9 0.6
 -5 -14 2 1.46 0.44
 5 14 2 2.5 0.58
 0 15 2 0.53 0.18
 0 15 -2 1.16 0.29
 0 15 2 1.09 0.3
 0 15 -2 0.62 0.32
 1 15 -2 8.38 0.63
 -1 15 2 8.66 0.65
 1 15 -2 9.71 0.8
 -1 15 2 7.91 0.55
 -1 15 -2 7.65 0.71
 1 15 2 8.68 0.51
 -1 15 -2 9.5 0.69
 1 15 2 8.07 0.61
 -2 -15 -2 24.07 1.05
 -2 15 2 24.42 1.16
 2 15 -2 24.76 1.22
 2 -15 2 24.9 1.27
 -2 15 2 24.58 1.12
 2 15 -2 23.48 1.31
 -2 15 2 24.38 1.21
 2 -15 -2 23.56 1.14
 2 15 2 24.28 1.15
 -2 15 -2 22.22 1.19
 -2 15 -2 25.5 1.36
 2 15 2 24.16 0.98
 -2 -15 2 22.37 1.16
 -3 -15 -2 0.57 0.25
 3 15 -2 0.64 0.38
 -3 15 2 0.66 0.36
 3 15 2 0.8 0.35
 -3 15 -2 0.04 0.28
 -3 -15 2 0.38 0.29
 4 15 -2 5.36 0.83
 -4 -15 -2 5.35 0.64
 -4 15 2 5.67 0.82
 -4 -15 2 5.17 0.71
 -4 15 -2 5.02 0.83
 4 15 2 6.27 0.8
 -5 -15 -2 3.28 0.58
 -5 15 2 2.93 0.65
 5 15 -2 3.27 0.75
 -5 15 -2 1.87 0.59
 -5 -15 2 3.28 0.63
 5 15 2 3.64 0.68
 0 16 -2 2.41 0.41
 0 16 2 2.02 0.3
 0 16 -2 1.97 0.46
 0 16 2 2.52 0.44
 -1 16 2 0.97 0.23
 -1 16 2 0.75 0.29
 1 16 -2 1.16 0.3
 1 16 -2 0.7 0.34
 1 16 2 1.39 0.25
 -1 16 -2 0.71 0.29
 -1 16 -2 1 0.39
 1 16 2 0.82 0.28
 -2 -16 -2 1.48 0.31
 -2 16 2 1.72 0.41
 2 16 -2 1.6 0.44
 -2 16 -2 1.72 0.45
 2 16 2 1.85 0.39
 2 16 2 1.22 0.25
 -2 -16 2 1.02 0.33
 2 -16 -2 1.46 0.35
 -3 16 2 1.51 0.41
 -3 -16 -2 0.69 0.27
 3 16 -2 1.15 0.43
 -3 -16 2 0.6 0.31
 -3 16 -2 0.38 0.35
 3 16 2 0.53 0.31
 -4 -16 -2 0.73 0.31
 4 16 -2 0.91 0.43
 -4 16 2 0.83 0.4
 -4 16 -2 1.23 0.49
 4 16 2 1.39 0.43
 -4 -16 2 0.75 0.38
 0 17 2 9.11 0.57
 0 17 -2 7.18 0.8
 0 17 2 7.67 0.64
 -1 17 2 1.86 0.41
 1 17 -2 2.07 0.48
 -1 17 2 2.28 0.36
 -1 17 -2 1.89 0.46
 1 17 2 2.29 0.42
 1 17 2 1.71 0.29
 -2 17 2 6.85 0.76
 2 17 -2 7.74 0.9
 -2 17 -2 6.84 0.85
 2 17 2 7.07 0.66
 -2 -17 2 6.63 0.72
 3 17 -2 1.35 0.45
 -3 17 2 0.31 0.31
 -3 -17 -2 0.14 0.22
 -3 -17 2 0.85 0.35
 -3 17 -2 0.16 0.33
 3 17 2 0.42 0.33
 4 17 -2 4.23 0.77
 -4 -17 -2 3.5 0.56
 -4 17 2 3.1 0.62
 -4 -17 2 1.91 0.49
 4 17 2 2.36 0.54
 -4 17 -2 2.85 0.67
 0 18 -2 -0.33 0.22
 0 18 2 0.17 0.24
 1 18 -2 7.04 0.84
 -1 18 2 6.2 0.68
 -1 18 -2 5.83 0.8
 1 18 2 5.38 0.62
 2 18 -2 2.66 0.61
 -2 18 2 1.35 0.41
 2 18 2 2.07 0.44
 -2 18 -2 2.76 0.59
 3 18 -2 3.31 0.7
 -3 -18 -2 3.97 0.52
 -3 18 2 4.32 0.67
 -3 -18 2 3.68 0.59
 -3 18 -2 3.23 0.69
 3 18 2 4.23 0.65
 0 19 -2 3.04 0.61
 0 19 2 1.93 0.41
 1 19 -2 0.18 0.31
 -1 19 2 -0.03 0.26
 -1 19 -2 0.22 0.29
 1 19 2 0.31 0.27
 2 19 -2 2.26 0.58
 -2 19 2 2.17 0.52
 2 19 2 2.45 0.48
 -2 19 -2 1.91 0.53
 0 20 2 3.52 0.54
 0 20 -2 4.23 0.7
 1 20 -2 0.28 0.33
 -1 20 2 0.11 0.26
 1 20 2 0.48 0.26
 -1 20 -2 0.54 0.38
 0 0 3 -1.51 0.08
 0 0 -3 -1.56 0.08
 0 0 -3 -1.46 0.07
 0 0 3 -1.46 0.02
 1 0 3 81.13 2.26
 -1 0 3 84.24 2.37
 1 0 -3 84.67 2.39
 1 0 -3 85.18 2.31
 -1 0 -3 80.66 2.27
 -1 0 3 81.13 2.3
 -2 0 -3 51.51 1.69
 2 0 -3 55.33 1.71
 -2 0 3 52.71 1.78
 2 0 -3 50.34 1.77
 -2 0 -3 51.83 1.65
 2 0 3 53.31 1.64
 -2 0 3 51.81 1.68
 -3 0 -3 0.5 0.2
 3 0 3 0.23 0.2
 3 0 -3 0.7 0.24
 -3 0 -3 0.62 0.24
 3 0 -3 0.57 0.27
 -3 0 3 1.08 0.34
 -3 0 3 0.57 0.24
 -4 0 3 0.9 0.32
 4 0 -3 0.17 0.29
 4 0 -3 0.5 0.28
 -4 0 -3 0.45 0.31
 -4 0 3 0.95 0.4
 4 0 3 0.25 0.23
 4 0 3 0.76 0.29
 -4 0 -3 0.87 0.3
 5 0 3 13.15 0.91
 5 0 -3 12.08 1.05
 -5 0 3 13.31 0.96
 5 0 3 15.63 0.97
 -5 0 -3 12.23 0.92
 5 0 -3 13.59 0.96
 6 0 -3 0.34 0.32
 -6 0 3 1.3 0.45
 -6 0 -3 0.86 0.4
 6 0 -3 0.83 0.42
 6 0 3 1.11 0.43
 -7 0 -3 0.31 0.42
 -7 0 3 0.58 0.37
 7 0 -3 0.99 0.55
 0 1 3 321.69 8.39
 0 1 -3 318.2 8.45
 0 -1 -3 330.18 8.5
 0 -1 3 325.45 8.52
 0 1 3 313.94 8.3
 0 1 -3 321.95 8.28
 0 -1 -3 321.27 8.51
 0 -1 3 332.49 8.62
 1 -1 3 29.33 0.95
 -1 -1 -3 28.4 0.91
 1 1 -3 27.83 1.02
 1 1 -3 30.91 0.99
 -1 1 3 30.58 1.02
 1 -1 -3 29.69 1.01
 -1 1 -3 28.24 0.95
 -1 -1 3 30.07 1.04
 1 -1 -3 28.85 0.95
 1 1 3 29.23 0.9
 -1 -1 3 29.34 0.98
 -1 1 -3 29.12 1.01
 -2 1 3 29.49 1.16
 -2 1 3 28.32 1.06
 -2 -1 -3 28.86 1.02
 2 1 -3 27.84 1.16
 2 1 -3 30.31 1.09
 -2 -1 -3 28.42 1.08
 2 -1 3 29.47 1.05
 -2 -1 3 28.18 1.16
 -2 -1 3 27.06 1.06
 -2 1 -3 29.52 1.05
 2 -1 -3 26.79 1.13
 2 1 3 27.96 1.01
 2 -1 -3 29.1 1.08
 -3 1 3 16.52 0.94
 -3 -1 -3 13.48 0.75
 3 1 -3 15.41 0.82
 -3 1 3 14.35 0.79
 -3 -1 -3 15.15 0.85
 3 1 -3 14.5 0.9
 3 -1 3 15.89 0.79
 -3 -1 3 14.85 0.81
 3 -1 -3 15.41 0.81
 -3 1 -3 15.76 0.86
 -3 -1 3 15.46 0.92
 3 1 3 14.79 0.75
 3 1 3 13.38 0.74
 -3 1 -3 14.83 0.8
 3 -1 -3 13.85 0.89
 4 1 -3 0.65 0.3
 -4 -1 -3 0.07 0.24
 -4 -1 -3 0.39 0.25
 -4 1 3 1.13 0.4
 -4 1 3 1.11 0.33
 4 1 -3 0.47 0.32
 4 -1 3 0.69 0.28
 4 1 3 1.11 0.3
 4 -1 -3 0.11 0.22
 -4 -1 3 0.53 0.29
 -4 -1 3 0.72 0.34
 4 -1 -3 0.8 0.34
 -4 1 -3 1.16 0.36
 4 1 3 0.37 0.24
 -4 1 -3 0.44 0.26
 -5 -1 -3 9.33 0.93
 5 1 -3 9.76 0.79
 5 -1 3 7.52 0.71
 5 1 -3 8.18 0.98
 -5 1 3 8.36 0.97
 -5 1 3 8.62 0.77
 5 -1 -3 8.5 0.99
 5 1 3 8.03 0.73
 -5 1 -3 8.33 0.77
 5 -1 -3 9.27 0.8
 5 1 3 7.69 0.71
 -5 -1 3 8.84 0.8
 -6 1 3 4.4 0.71
 -6 -1 -3 2.18 0.56
 6 1 -3 2.96 0.69
 6 1 -3 4.11 0.67
 6 -1 -3 3.99 0.73
 6 1 3 3.57 0.64
 -6 -1 3 2.75 0.61
 6 -1 -3 2.8 0.58
 -6 1 -3 3.84 0.67
 -7 -1 -3 1.25 0.52
 -7 1 3 1.51 0.49
 7 1 -3 2.22 0.64
 7 -1 -3 2.08 0.61
 -7 1 -3 1.69 0.58
 -7 -1 3 0.89 0.45
 7 1 3 0.68 0.45
 0 -2 3 11.47 0.47
 0 -2 3 11.78 0.51
 0 -2 -3 12.03 0.37
 0 -2 -3 11.86 0.39
 0 2 3 11.52 0.36
 0 2 -3 12.22 0.52
 0 2 -3 11.04 0.47
 -1 2 3 57.73 1.67
 1 -2 3 58.76 1.72
 -1 -2 -3 58.64 1.64
 -1 -2 -3 56.54 1.61
 1 2 -3 59.76 1.82
 -1 2 3 60.45 1.75
 1 2 -3 58.35 1.74
 -1 2 -3 59.84 1.74
 -1 -2 3 58.7 1.8
 1 -2 -3 57.83 1.68
 1 2 3 57.28 1.61
 1 -2 -3 60.04 1.75
 -1 2 -3 59.29 1.8
 -1 -2 3 58 1.74
 2 2 -3 1.71 0.32
 2 -2 3 2.03 0.28
 -2 2 3 2.42 0.37
 -2 -2 -3 2.77 0.35
 2 2 -3 2.44 0.33
 -2 2 3 2.33 0.3
 -2 -2 -3 2.54 0.31
 -2 2 -3 2.34 0.31
 2 2 3 2.25 0.28
 -2 -2 3 2.3 0.36
 2 -2 -3 2.58 0.36
 -2 -2 3 2.73 0.34
 2 2 3 2.42 0.29
 2 -2 -3 3.11 0.35
 -3 2 3 6.94 0.62
 -3 -2 -3 7.65 0.54
 3 2 -3 6.63 0.55
 -3 -2 -3 8.08 0.63
 3 2 -3 7.91 0.66
 -3 2 3 7.12 0.55
 3 -2 3 7.22 0.55
 3 2 3 7.77 0.53
 3 -2 -3 8.42 0.59
 -3 -2 3 7.05 0.62
 -3 2 -3 6.52 0.59
 -3 -2 3 7.57 0.57
 3 2 3 7.05 0.55
 -3 2 -3 6.37 0.55
 3 -2 -3 8.23 0.68
 4 2 -3 24.4 1.19
 -4 -2 -3 21.19 1.1
 -4 2 3 24.95 1.34
 -4 2 3 23.3 1.17
 -4 -2 -3 26.82 1.33
 4 2 -3 23.46 1.33
 4 -2 3 24.35 1.16
 -4 -2 3 26.53 1.37
 4 2 3 24.39 1.13
 -4 -2 3 23.97 1.19
 4 2 3 21.34 1.14
 -4 2 -3 24.56 1.29
 4 -2 -3 20.63 1.21
 4 -2 -3 23.66 1.18
 -4 2 -3 22.27 1.15
 5 2 -3 41.49 2.02
 -5 2 3 44.44 2.05
 -5 2 3 41.25 1.83
 -5 -2 -3 42.43 1.81
 5 -2 3 46.78 1.87
 5 2 -3 46.31 1.91
 -5 2 -3 41.85 1.84
 5 2 3 43.03 1.79
 5 2 3 39.8 1.82
 -5 -2 3 40.25 1.82
 5 -2 -3 43.81 1.99
 5 -2 -3 43.46 1.86
 6 -2 3 0.61 0.28
 6 2 -3 0.34 0.34
 -6 2 3 0.24 0.32
 6 2 -3 1.33 0.52
 -6 -2 -3 -0.1 0.3
 -6 2 -3 0.2 0.34
 6 -2 -3 0.09 0.28
 -6 -2 3 0.11 0.29
 6 -2 -3 0.3 0.34
 6 2 3 0.38 0.29
 -7 2 3 7.71 0.98
 -7 -2 -3 8 0.96
 7 2 -3 8.78 1.21
 7 -2 -3 6.87 1
 7 2 3 5.9 0.85
 -7 -2 3 5.92 0.88
 -7 2 -3 9.06 1.07
 0 3 -3 32.89 1.11
 0 -3 -3 33.95 0.89
 0 3 -3 33.21 1.07
 0 -3 3 32.81 1.11
 0 -3 -3 33.09 0.87
 0 -3 3 32.38 1.06
 -1 3 3 28.99 0.97
 1 3 -3 27.38 0.99
 1 -3 3 27.57 0.98
 -1 3 3 28.07 0.91
 -1 -3 -3 29.25 0.89
 1 3 -3 28.91 1.07
 -1 -3 -3 28.93 0.85
 -1 -3 3 27.07 0.98
 -1 -3 3 28.32 1.06
 1 -3 -3 26.71 0.91
 1 -3 -3 28.09 0.97
 1 3 3 29.25 0.84
 -1 3 -3 27.77 0.99
 -2 -3 -3 16.4 0.69
 2 -3 3 16.73 0.75
 2 3 -3 14.48 0.73
 -2 3 3 15.94 0.81
 2 3 -3 16.66 0.86
 -2 -3 -3 16.4 0.75
 2 -3 -3 17.61 0.83
 -2 3 -3 16.17 0.76
 2 -3 -3 16.87 0.74
 2 3 3 16.05 0.67
 -2 -3 3 16.16 0.76
 -2 -3 3 17.27 0.85
 2 3 3 15.86 0.71
 -3 3 3 10.51 0.67
 -3 -3 -3 11.29 0.74
 -3 -3 -3 10.41 0.64
 3 -3 3 11.55 0.7
 3 3 -3 12.48 0.73
 3 3 -3 11.22 0.8
 -3 3 3 11.25 0.77
 3 -3 -3 10.94 0.74
 3 3 3 10.92 0.68
 -3 -3 3 11.33 0.78
 -3 3 -3 11.53 0.7
 3 3 3 12.25 0.65
 3 -3 -3 10.9 0.68
 -3 -3 3 10.86 0.69
 -3 3 -3 12.14 0.76
 4 3 -3 16.23 1.09
 -4 3 3 17.77 1.1
 -4 -3 -3 16.22 0.93
 -4 -3 -3 18.44 1.09
 -4 3 3 17.67 0.98
 4 3 -3 18.24 1.02
 4 -3 3 19.37 1.01
 4 -3 -3 17.43 1.06
 -4 -3 3 17.19 0.99
 4 3 3 18.61 0.95
 -4 3 -3 16.01 0.97
 -4 -3 3 17.47 1.11
 -4 3 -3 16.02 1.06
 4 -3 -3 16.13 0.96
 4 3 3 16.14 0.97
 5 3 -3 14.48 0.99
 -5 -3 -3 15.6 1
 -5 3 3 13.48 0.97
 -5 3 3 12.93 1.09
 5 -3 3 13.16 0.92
 5 3 -3 11.94 1.03
 -5 3 -3 12.8 0.96
 5 -3 -3 13.66 0.96
 5 -3 -3 12.58 1.01
 5 3 3 13.76 0.98
 -5 -3 3 13.87 0.97
 -6 -3 -3 10.07 0.94
 6 -3 3 13.32 1.01
 -6 3 3 11.31 0.97
 6 3 -3 12.17 1.12
 6 -3 -3 11.67 1.09
 -6 -3 3 13.49 1.05
 -6 3 -3 11.44 1.01
 6 -3 -3 12.77 1.02
 6 3 3 11.31 0.99
 -7 -3 -3 -0.18 0.32
 7 3 -3 2.62 0.76
 7 -3 -3 0.27 0.41
 -7 -3 3 0.57 0.43
 -7 3 -3 -0.12 0.3
 7 3 3 -0.19 0.24
 0 -4 -3 8.12 0.25
 0 4 -3 8.18 0.45
 0 4 -3 8.45 0.5
 0 -4 3 7.9 0.47
 0 4 -3 8.57 0.49
 1 4 -3 82.93 2.43
 -1 4 3 85.52 2.31
 1 -4 3 84.15 2.43
 1 -4 3 83.64 2.5
 -1 -4 -3 85.54 2.28
 1 4 -3 80.97 2.5
 -1 4 3 85.59 2.39
 -1 -4 -3 81.99 2.23
 -1 4 -3 83.52 2.51
 1 4 3 82.86 2.24
 -1 -4 3 86.44 2.44
 -1 -4 3 86.82 2.5
 -1 4 -3 81.76 2.42
 1 -4 -3 84.34 2.36
 1 4 3 83.67 2.21
 1 -4 -3 84.95 2.32
 2 4 -3 40.88 1.54
 -2 4 3 40.29 1.37
 2 4 -3 42.42 1.45
 2 -4 3 42.32 1.43
 -2 -4 -3 38.64 1.29
 -2 -4 -3 43.59 1.42
 -2 4 3 42.24 1.49
 2 -4 -3 38.55 1.42
 -2 4 -3 38.46 1.42
 2 4 3 38.01 1.33
 -2 -4 3 42.24 1.53
 2 4 3 40.03 1.28
 -2 -4 3 40.17 1.42
 2 -4 -3 39.55 1.37
 3 4 -3 21.58 1.15
 -3 4 3 21.98 1.02
 3 -4 3 21.08 1.01
 -3 4 3 22.38 1.14
 -3 -4 -3 23.15 1.09
 3 4 -3 23.8 1.07
 -3 -4 -3 20.6 0.95
 3 4 3 21.61 1.01
 -3 -4 3 21.69 1.03
 3 -4 -3 23.69 1.04
 -3 4 -3 24.47 1.08
 3 4 3 21.19 0.93
 -3 4 -3 23.29 1.08
 -3 -4 3 22.78 1.15
 3 -4 -3 22.23 1.1
 -4 -4 -3 7.1 0.62
 -4 4 3 8.04 0.67
 4 4 -3 8.28 0.77
 -4 4 3 7.36 0.83
 4 4 -3 7.94 0.69
 -4 -4 -3 8.45 0.75
 4 -4 3 8.52 0.7
 4 -4 -3 8.64 0.69
 4 -4 -3 8.09 0.83
 4 4 3 7.27 0.66
 -4 4 -3 9.5 0.78
 -4 -4 3 8.46 0.7
 4 4 3 7.98 0.61
 -4 -4 3 7.82 0.85
 -4 4 -3 7.31 0.67
 -5 4 3 9.68 1.06
 5 4 -3 6.47 0.86
 -5 -4 -3 8.27 0.75
 -5 4 3 8.89 0.78
 5 -4 3 7.52 0.83
 5 4 -3 7.2 0.82
 5 4 3 8.08 0.89
 -5 4 -3 7.03 0.79
 5 -4 -3 6.16 0.71
 5 -4 -3 7.92 0.9
 -5 -4 3 7.16 0.82
 6 -4 3 22.22 1.33
 -6 -4 -3 18.27 1.23
 6 4 -3 17.27 1.38
 -6 4 3 18.49 1.24
 6 -4 -3 20.96 1.4
 -6 -4 3 20.04 1.29
 6 -4 -3 21.44 1.3
 6 4 3 19.43 1.29
 -6 4 -3 17.62 1.25
 -7 -4 -3 2.45 0.6
 7 4 -3 2.61 0.79
 -7 -4 3 1.07 0.46
 -7 4 -3 2.31 0.56
 7 -4 -3 1.92 0.64
 7 4 3 2.21 0.58
 0 5 -3 96.8 2.76
 0 5 -3 99.78 2.74
 0 -5 -3 94.77 2.47
 0 5 -3 90.95 2.77
 0 -5 3 99.83 2.8
 -1 5 3 4.05 0.28
 1 5 -3 3.64 0.42
 1 -5 3 4.33 0.39
 1 -5 3 3.88 0.36
 1 5 -3 4.19 0.36
 -1 -5 -3 3.85 0.25
 -1 -5 -3 4.05 0.23
 -1 5 3 3.97 0.31
 1 5 3 4.02 0.21
 -1 -5 3 3.93 0.35
 -1 5 -3 3.27 0.38
 -1 5 -3 4.04 0.41
 1 -5 -3 3.72 0.28
 1 5 3 3.51 0.24
 1 -5 -3 4.05 0.28
 -1 -5 3 3.64 0.4
 -2 5 3 54.06 1.84
 -2 -5 -3 56.29 1.75
 -2 5 3 54.23 1.72
 2 -5 3 51.49 1.77
 2 5 -3 56.95 1.81
 -2 -5 -3 53.55 1.65
 2 5 -3 55.56 1.92
 -2 5 -3 55.26 1.82
 -2 -5 3 50.59 1.77
 -2 5 -3 54.07 1.9
 2 5 3 55.01 1.64
 2 5 3 53.54 1.7
 2 -5 -3 52.03 1.77
 -2 -5 3 54.75 1.89
 2 -5 -3 54.45 1.73
 3 -5 3 0.99 0.28
 -3 -5 -3 0.61 0.22
 -3 -5 -3 0.91 0.28
 3 5 -3 0.44 0.23
 -3 5 3 1 0.32
 3 5 -3 0.81 0.3
 -3 5 3 0.6 0.19
 -3 5 -3 0.34 0.23
 -3 -5 3 0.81 0.26
 3 5 3 0.83 0.21
 3 5 3 0.8 0.28
 3 -5 -3 1.15 0.32
 -3 5 -3 1.4 0.36
 3 -5 -3 0.58 0.23
 -3 -5 3 0.45 0.25
 4 5 -3 9.09 0.83
 -4 5 3 9.35 0.72
 -4 -5 -3 10.67 0.81
 -4 5 3 9.41 0.85
 4 5 -3 8.89 0.73
 -4 -5 -3 8.48 0.67
 4 -5 3 9.48 0.74
 -4 -5 3 9.86 0.84
 -4 5 -3 10.2 0.77
 4 5 3 8.18 0.71
 4 -5 -3 9.06 0.76
 -4 -5 3 9.48 0.75
 4 -5 -3 10.74 0.76
 4 5 3 9.17 0.66
 -4 5 -3 10.91 0.84
 5 -5 3 13.97 0.96
 -5 5 3 12.28 1.03
 -5 5 3 10.59 0.88
 -5 -5 -3 10.97 0.86
 5 5 -3 12.35 0.92
 5 5 -3 9.7 1.11
 5 -5 -3 11.77 0.94
 -5 5 -3 11.82 0.91
 -5 -5 3 12 0.92
 5 5 3 9.88 0.87
 5 -5 -3 12.17 0.91
 6 -5 3 7.72 0.93
 -6 -5 -3 8.15 0.92
 6 5 -3 5.32 0.9
 -6 5 3 5.54 0.76
 -6 -5 3 5.98 0.86
 -6 5 -3 6.07 0.85
 6 5 3 4.77 0.74
 6 -5 -3 8.45 1.01
 6 -5 -3 6.44 0.82
 7 5 -3 2.28 0.71
 -7 -5 -3 2.37 0.59
 -7 5 -3 1.88 0.6
 7 5 3 2.53 0.64
 -7 -5 3 2.45 0.66
 7 -5 -3 1.59 0.51
 0 6 -3 105.11 3.03
 0 6 3 105.54 2.75
 0 6 3 107.07 2.72
 0 6 3 105.15 2.76
 0 6 3 107.05 2.73
 0 -6 3 106.64 3.09
 0 -6 -3 108.28 2.76
 0 6 -3 102.77 3.08
 0 6 -3 110.96 3.03
 1 -6 3 39.37 1.37
 1 6 -3 37.59 1.42
 -1 -6 -3 40.1 1.18
 -1 -6 -3 38.89 1.14
 -1 6 3 39.36 1.27
 -1 6 3 39.81 1.22
 1 6 -3 39.15 1.36
 1 -6 3 40.27 1.45
 -1 -6 3 40.07 1.43
 1 6 3 41.41 1.18
 -1 6 -3 41.61 1.39
 -1 -6 3 39.48 1.36
 1 -6 -3 40.15 1.23
 -1 6 -3 39.26 1.44
 1 6 3 41.13 1.12
 2 6 -3 5.59 0.47
 2 -6 3 5.82 0.48
 2 6 -3 4.87 0.55
 -2 6 3 5.42 0.48
 -2 6 3 5.76 0.42
 -2 -6 -3 5.56 0.37
 -2 -6 -3 6.14 0.44
 -2 -6 3 5.14 0.45
 -2 -6 3 6.69 0.53
 2 6 3 5.37 0.41
 -2 6 -3 5.65 0.6
 2 6 3 5.82 0.36
 2 -6 -3 5.15 0.42
 2 -6 -3 5.38 0.42
 -2 6 -3 5.55 0.48
 -3 6 3 0.77 0.22
 3 -6 3 1.76 0.37
 -3 6 3 2.22 0.43
 -3 -6 -3 1.47 0.28
 3 6 -3 1.86 0.35
 -3 -6 -3 2.18 0.38
 3 6 -3 1.79 0.42
 3 6 3 2.28 0.31
 3 -6 -3 2.03 0.36
 3 -6 -3 1.61 0.35
 3 6 3 2.07 0.36
 -3 6 -3 2.65 0.42
 -3 -6 3 2.28 0.37
 -3 -6 3 1.78 0.39
 -4 -6 -3 2.64 0.49
 4 6 -3 3.21 0.59
 4 6 -3 3.19 0.53
 -4 6 3 3.92 0.65
 4 -6 3 3.58 0.52
 -4 -6 -3 3.01 0.44
 -4 6 3 3.43 0.5
 -4 -6 3 3 0.51
 4 -6 -3 3.12 0.53
 4 6 3 3.59 0.53
 -4 6 -3 4.11 0.62
 -4 6 -3 3.48 0.54
 4 -6 -3 3.68 0.52
 -5 6 3 34.58 1.82
 -5 6 3 32.52 1.6
 5 6 -3 30.45 1.74
 5 -6 3 35.52 1.63
 -5 -6 -3 34.28 1.57
 -5 -6 3 35.3 1.64
 -5 6 -3 35.12 1.67
 5 6 3 35.58 1.67
 5 -6 -3 33.21 1.6
 5 -6 -3 35.38 1.67
 6 6 -3 5.74 0.96
 -6 -6 -3 5.41 0.76
 -6 6 3 5.35 0.8
 6 -6 3 6.38 0.87
 6 -6 -3 5.51 0.83
 -6 6 -3 6.6 0.86
 6 6 3 6.07 0.83
 -6 -6 3 5.76 0.84
 7 6 -3 3.18 0.82
 -7 -6 -3 3.46 0.73
 -7 -6 3 4.13 0.76
 7 6 3 3.58 0.71
 7 -6 -3 2.64 0.68
 0 7 -3 8.83 0.52
 0 7 3 8.11 0.34
 0 -7 3 9.55 0.58
 0 7 3 8.29 0.31
 0 7 -3 9 0.57
 0 -7 -3 8.18 0.35
 0 7 3 8.43 0.31
 1 -7 3 46.35 1.59
 1 7 -3 46.13 1.66
 -1 7 3 45.7 1.47
 -1 -7 -3 45.69 1.34
 1 7 -3 50.3 1.61
 1 -7 3 48.45 1.68
 -1 -7 -3 46.82 1.37
 -1 7 3 47.82 1.42
 -1 7 -3 46.95 1.59
 1 -7 -3 45.49 1.42
 1 7 3 47.75 1.32
 1 7 3 47.03 1.38
 -1 7 -3 48.37 1.69
 -1 -7 3 49.89 1.67
 -1 -7 3 44.51 1.56
 2 7 -3 7.36 0.61
 -2 7 3 7.14 0.47
 -2 -7 -3 7.52 0.47
 2 -7 3 5.68 0.5
 -2 -7 -3 6.08 0.4
 2 7 -3 6.39 0.51
 -2 7 3 7.14 0.53
 -2 -7 3 6.17 0.5
 -2 -7 3 7.03 0.59
 2 7 3 6.9 0.4
 -2 7 -3 6.35 0.52
 2 7 3 6.82 0.47
 2 -7 -3 7.17 0.48
 -2 7 -3 6.18 0.58
 3 7 -3 37.26 1.64
 3 7 -3 39.58 1.53
 3 -7 3 38.41 1.52
 -3 -7 -3 35.69 1.36
 -3 -7 -3 37.82 1.48
 -3 7 3 36.71 1.44
 -3 7 3 36 1.57
 3 7 3 37.15 1.47
 3 7 3 39.36 1.37
 -3 -7 3 40.42 1.65
 3 -7 -3 37.49 1.45
 -3 7 -3 36.28 1.5
 -3 -7 3 34.68 1.47
 4 7 -3 7.08 0.82
 4 -7 3 8.47 0.72
 -4 7 3 8.04 0.67
 -4 -7 -3 7.9 0.64
 4 7 -3 9.59 0.75
 -4 7 3 8.84 0.95
 4 -7 -3 8.76 0.71
 -4 7 -3 8.72 0.78
 4 -7 -3 7.67 0.68
 -4 7 -3 8.47 0.74
 -4 -7 3 7.69 0.7
 4 7 3 8.42 0.72
 -5 7 3 1.86 0.45
 -5 -7 -3 1.53 0.41
 5 7 -3 1.52 0.52
 -5 7 3 2.54 0.61
 5 -7 3 2.79 0.55
 5 -7 -3 1.85 0.48
 -5 7 -3 1.92 0.48
 -5 -7 3 2.33 0.51
 5 -7 -3 2.06 0.47
 5 7 3 3.13 0.58
 -6 -7 -3 8.19 0.9
 6 7 -3 9.31 1.2
 6 -7 -3 9.39 1
 6 7 3 10.06 0.94
 -6 -7 3 9.92 1.06
 -6 7 -3 10.6 1.12
 7 7 -3 5.31 0.96
 -7 -7 -3 5.9 0.88
 7 7 3 5.55 0.89
 -7 -7 3 6.42 0.96
 0 8 -3 30.03 1.11
 0 -8 3 27.93 1.15
 0 8 3 26.97 0.87
 0 8 3 28.16 0.83
 0 8 3 27.29 0.83
 0 8 -3 26.6 1.14
 -1 -8 -3 11.37 0.48
 1 8 -3 12.07 0.65
 1 8 -3 10.85 0.68
 1 -8 3 10.63 0.63
 1 -8 3 11.4 0.7
 -1 8 3 11 0.54
 -1 8 3 10.81 0.55
 -1 8 3 11.16 0.51
 -1 -8 -3 10.51 0.44
 -1 8 -3 10.39 0.67
 1 8 3 11.58 0.44
 1 -8 -3 10.5 0.5
 -1 -8 3 10.22 0.62
 -1 -8 3 11.95 0.69
 1 8 3 10.24 0.48
 1 8 3 11.45 0.43
 -2 8 3 16.85 0.84
 -2 8 3 16.4 0.76
 2 8 -3 15.59 0.83
 2 -8 3 15.84 0.84
 -2 -8 -3 16.07 0.69
 2 8 -3 18 0.96
 -2 -8 -3 17.03 0.76
 2 8 3 14.61 0.73
 -2 -8 3 16.58 0.9
 -2 -8 3 14.94 0.81
 2 8 3 16.95 0.67
 2 -8 -3 16.48 0.77
 -2 8 -3 15.85 0.84
 -2 8 -3 16.32 0.93
 -3 8 3 7.4 0.58
 -3 -8 -3 6.74 0.52
 3 8 -3 7.46 0.62
 -3 8 3 7.18 0.66
 3 8 -3 6.25 0.73
 3 -8 3 8.03 0.64
 -3 -8 -3 6.47 0.57
 -3 -8 3 6.31 0.7
 -3 8 -3 6.95 0.66
 -3 8 -3 8.01 0.65
 3 8 3 6.75 0.58
 3 8 3 7.38 0.56
 -3 -8 3 7.62 0.62
 3 -8 -3 7.49 0.58
 4 8 -3 21.21 1.31
 4 -8 3 23.64 1.21
 -4 8 3 22.7 1.31
 -4 -8 -3 21.45 1.07
 4 8 3 20.44 1.15
 -4 8 -3 23.52 1.31
 -4 8 -3 22.37 1.21
 -4 -8 3 21.59 1.18
 4 -8 -3 24.15 1.19
 5 -8 3 12.01 0.94
 -5 8 3 13 0.94
 -5 -8 -3 12.44 0.9
 -5 8 3 12.65 1.09
 5 8 -3 13 1.1
 -5 8 -3 13.53 1.02
 5 -8 -3 13.35 0.97
 -5 -8 3 13.84 0.99
 5 8 3 12.92 0.98
 -6 -8 -3 10.46 0.91
 6 8 -3 9.06 1.19
 -6 -8 3 8.34 0.95
 6 8 3 10.03 0.94
 -6 8 -3 8.86 1.06
 7 8 -3 4.79 0.96
 -7 -8 -3 5.46 0.86
 7 8 3 5.04 0.84
 -7 -8 3 4.98 0.8
 0 -9 3 0.38 0.18
 0 9 3 0.08 0.09
 0 9 3 0.12 0.08
 0 9 -3 0.15 0.2
 0 9 -3 -0.07 0.13
 0 9 -3 0.15 0.18
 0 9 3 0.02 0.11
 -1 9 3 8.52 0.45
 1 9 -3 8.49 0.64
 1 -9 3 9.27 0.65
 -1 -9 -3 8.58 0.4
 1 -9 3 9.45 0.61
 -1 9 3 8.42 0.47
 -1 -9 -3 8.66 0.43
 -1 9 3 7.37 0.47
 1 9 -3 9.36 0.59
 -1 9 -3 8.06 0.6
 1 9 3 8.19 0.36
 -1 -9 3 8.49 0.61
 1 -9 -3 7.89 0.45
 1 9 3 9 0.38
 1 9 3 7.59 0.42
 -1 -9 3 7.52 0.55
 -2 -9 -3 6.35 0.45
 -2 -9 -3 5.22 0.39
 -2 9 3 5.78 0.45
 -2 9 3 4.95 0.52
 2 -9 3 6.02 0.53
 2 9 -3 5.76 0.51
 2 9 -3 5.33 0.63
 2 9 3 6 0.46
 -2 -9 3 6.32 0.65
 2 9 3 6.45 0.39
 -2 -9 3 5.7 0.51
 -2 9 -3 6.23 0.53
 2 -9 -3 5.27 0.44
 -2 9 -3 5.94 0.66
 3 9 -3 2.64 0.51
 -3 -9 -3 2.09 0.33
 -3 9 3 1.85 0.39
 3 -9 3 1.64 0.36
 3 9 -3 2.49 0.43
 -3 -9 -3 1.3 0.33
 -3 9 3 2.23 0.36
 -3 -9 3 2.51 0.44
 -3 9 -3 2.53 0.5
 3 9 3 1.81 0.37
 3 -9 -3 2.12 0.37
 -3 -9 3 2.81 0.54
 -3 9 -3 2.03 0.42
 -4 9 3 0.56 0.27
 -4 -9 -3 0.03 0.2
 4 -9 3 0.47 0.29
 4 9 -3 0.3 0.34
 -4 9 3 0.32 0.29
 4 9 3 0.19 0.27
 4 -9 -3 0.65 0.29
 -4 -9 3 0.49 0.29
 -4 9 -3 0.46 0.31
 -4 9 -3 0.87 0.36
 -5 -9 -3 2.13 0.46
 5 9 -3 1.71 0.57
 -5 9 3 1.97 0.51
 -5 9 3 2.7 0.51
 5 -9 3 2.86 0.53
 -5 9 -3 2.19 0.49
 5 -9 -3 1.9 0.46
 5 9 3 2.61 0.57
 -5 -9 3 2.57 0.55
 6 9 -3 3.83 0.82
 -6 -9 -3 5.15 0.76
 6 9 3 3.5 0.67
 -6 -9 3 5.03 0.79
 -7 -9 -3 1.77 0.54
 7 9 -3 1.64 0.58
 -7 -9 3 1.9 0.6
 7 9 3 2.2 0.63
 0 10 -3 1.87 0.32
 0 10 3 1.62 0.23
 0 10 3 1.65 0.19
 0 -10 3 1.91 0.35
 0 10 -3 2.09 0.38
 0 10 -3 1.51 0.3
 0 10 3 1.34 0.17
 -1 10 3 3.53 0.31
 -1 -10 -3 3.54 0.27
 1 10 -3 3.44 0.49
 -1 10 3 3.34 0.35
 1 10 -3 4.29 0.49
 -1 10 3 4.27 0.37
 -1 -10 -3 4.07 0.31
 1 -10 3 3.22 0.43
 1 -10 3 4.66 0.56
 -1 10 -3 5.41 0.55
 1 -10 -3 3.48 0.32
 -1 -10 3 4.03 0.51
 1 10 3 3.6 0.32
 1 10 3 3.83 0.26
 -1 10 -3 4.65 0.51
 -1 10 -3 3.33 0.48
 -1 -10 3 3.44 0.42
 1 10 3 3.45 0.24
 2 10 -3 4.11 0.57
 -2 10 3 3.82 0.47
 2 10 -3 4.45 0.53
 -2 -10 -3 4.08 0.35
 -2 -10 -3 4.07 0.39
 -2 10 3 4.05 0.42
 2 -10 3 4.11 0.48
 -2 -10 3 3.73 0.47
 2 10 3 4.27 0.44
 -2 -10 3 4.04 0.54
 -2 10 -3 4.38 0.6
 -2 10 -3 3.57 0.47
 2 -10 -3 3.86 0.43
 -3 -10 -3 5.91 0.54
 3 -10 3 6.14 0.67
 3 10 -3 5.5 0.71
 -3 10 3 5.97 0.53
 -3 10 3 5.68 0.65
 -3 -10 -3 4.43 0.47
 3 10 3 5.85 0.62
 -3 10 -3 6.21 0.68
 3 -10 -3 6.41 0.56
 -3 -10 3 5.6 0.61
 -3 10 -3 6.3 0.79
 -4 -10 -3 1.42 0.34
 4 10 -3 1.05 0.42
 -4 10 3 1.41 0.43
 4 -10 3 1.09 0.36
 -4 10 3 0.93 0.34
 4 10 3 0.96 0.36
 -4 -10 3 1.34 0.39
 -4 10 -3 1.68 0.44
 -4 10 -3 1.01 0.36
 -4 10 -3 1.58 0.45
 4 -10 -3 1.68 0.42
 -5 -10 -3 3.88 0.56
 -5 10 3 3.72 0.71
 5 10 -3 4.77 0.84
 -5 10 -3 4.34 0.7
 5 10 3 4.1 0.66
 -5 -10 3 4.95 0.72
 6 10 -3 3.08 0.8
 -6 -10 -3 4.51 0.71
 -6 -10 3 5.07 0.77
 6 10 3 3.95 0.71
 0 11 3 2.06 0.23
 0 11 3 2.34 0.28
 0 11 -3 2.55 0.43
 0 11 -3 3.28 0.43
 0 -11 3 1.43 0.32
 0 11 -3 2.5 0.37
 0 11 3 2.21 0.24
 -1 -11 -3 5.73 0.37
 -1 -11 -3 6.05 0.4
 1 11 -3 5.99 0.52
 1 -11 3 5.81 0.64
 1 11 -3 6.97 0.62
 -1 11 3 5.74 0.44
 -1 11 3 6.03 0.41
 -1 11 3 6.43 0.43
 1 -11 3 5.8 0.63
 1 11 -3 5.71 0.53
 1 11 3 6.42 0.34
 -1 -11 3 6.37 0.58
 -1 11 -3 6.84 0.54
 -1 -11 3 6.13 0.53
 -1 11 -3 6.98 0.71
 1 11 3 5.71 0.4
 -1 11 -3 6.45 0.53
 1 -11 -3 6.72 0.44
 1 11 3 6.45 0.35
 -2 -11 -3 0.56 0.19
 -2 11 3 0.74 0.25
 -2 11 3 0.95 0.24
 -2 -11 -3 0.32 0.19
 -2 11 3 0.67 0.26
 2 -11 3 0.55 0.25
 2 11 -3 0.08 0.25
 -2 11 -3 0.14 0.22
 -2 -11 3 -0.03 0.2
 2 11 3 0.09 0.18
 2 -11 -3 0.63 0.22
 3 11 -3 2.04 0.49
 -3 -11 -3 1.39 0.34
 -3 11 3 2.23 0.44
 -3 11 3 1.15 0.3
 3 -11 3 1.28 0.36
 -3 -11 -3 1.22 0.28
 3 -11 -3 1.48 0.35
 3 11 3 0.84 0.29
 -3 -11 3 1.22 0.34
 -3 11 -3 1.63 0.38
 -3 11 -3 1.68 0.48
 -4 11 3 17.33 1.12
 4 -11 3 15.62 1.03
 4 11 -3 12.76 1.04
 -4 -11 -3 14.67 0.87
 -4 11 3 14.9 0.95
 -4 -11 3 14.57 0.98
 -4 11 -3 13.67 0.98
 -4 11 -3 14.85 1.03
 4 -11 -3 14.57 0.95
 4 11 3 14.86 0.97
 -4 11 -3 14.17 1.09
 -5 -11 -3 2.81 0.52
 5 11 -3 2.92 0.72
 -5 11 3 2.68 0.59
 5 11 3 2.85 0.56
 -5 -11 3 3.86 0.66
 6 11 -3 -0.46 0.32
 -6 -11 -3 0.31 0.33
 -6 -11 3 0.55 0.39
 6 11 3 0.31 0.36
 0 -12 3 16.03 0.92
 0 12 3 15.33 0.68
 0 12 3 15.83 0.62
 0 12 -3 14.07 0.9
 0 12 -3 14.19 0.81
 1 12 -3 28.75 1.24
 -1 -12 -3 28.02 1.04
 -1 12 3 26.4 1.04
 -1 12 3 29.07 1.04
 1 12 -3 26.88 1.31
 -1 12 3 27.8 1.1
 -1 12 -3 27.82 1.23
 1 12 3 29.14 1.06
 1 -12 -3 27.86 1.08
 1 12 3 27.92 0.93
 -1 12 -3 28.76 1.34
 -1 -12 3 28.09 1.21
 -2 -12 -3 1.78 0.32
 -2 12 3 2.1 0.4
 -2 12 3 2.12 0.34
 -2 12 3 1.34 0.32
 -2 -12 -3 1.94 0.28
 2 -12 3 1.88 0.38
 2 12 -3 1.67 0.43
 -2 -12 3 1.86 0.39
 -2 12 -3 1.97 0.46
 2 -12 -3 1.78 0.33
 -2 12 -3 1.6 0.35
 2 12 3 2.12 0.36
 3 12 -3 1.96 0.5
 -3 12 3 3.37 0.52
 -3 -12 -3 3.36 0.42
 3 -12 3 3.57 0.53
 -3 12 3 3.23 0.44
 3 -12 -3 3.75 0.49
 -3 -12 3 2.73 0.47
 -3 12 -3 2.8 0.55
 -3 12 -3 3.35 0.51
 3 12 3 3.24 0.47
 -4 -12 -3 14.91 0.9
 4 -12 3 14.8 1.03
 4 12 -3 16.52 1.19
 -4 12 3 17.42 1.14
 -4 12 3 15.91 0.99
 -4 12 -3 13.71 1.01
 -4 12 -3 17.02 1.11
 4 -12 -3 15.66 0.98
 -4 12 -3 15.85 1.19
 -4 -12 3 15.26 1.02
 4 12 3 15.44 1.02
 5 12 -3 21.42 1.48
 -5 -12 -3 20.17 1.18
 -5 -12 3 22.26 1.32
 5 12 3 20.81 1.26
 -5 12 -3 20.12 1.42
 6 12 -3 2.25 0.67
 -6 -12 -3 1.72 0.47
 6 12 3 1.74 0.5
 -6 -12 3 1.87 0.52
 0 13 3 1.35 0.26
 0 13 -3 1.56 0.38
 0 13 -3 1.17 0.3
 0 13 3 1.37 0.21
 -1 13 3 12.09 0.67
 1 13 -3 9.42 0.78
 -1 -13 -3 11.73 0.61
 -1 13 3 11.19 0.6
 -1 13 3 10.66 0.58
 1 13 -3 11.01 0.72
 -1 13 -3 10.86 0.74
 1 13 3 10.16 0.58
 -1 13 -3 11 0.82
 1 13 3 11.19 0.5
 1 -13 -3 11.25 0.63
 -2 -13 -3 4.93 0.5
 2 -13 3 4 0.54
 2 13 -3 4.98 0.68
 -2 13 3 5.29 0.49
 -2 13 3 5.15 0.52
 -2 13 3 5.53 0.61
 -2 -13 -3 5.08 0.42
 2 13 3 5.18 0.53
 -2 13 -3 5.34 0.68
 -2 -13 3 5.47 0.64
 2 13 3 4.7 0.37
 -2 13 -3 4.31 0.57
 2 -13 -3 5.43 0.5
 3 -13 3 28.18 1.4
 -3 -13 -3 27.86 1.19
 3 13 -3 26.29 1.48
 -3 13 3 28.73 1.39
 -3 13 3 31.01 1.31
 -3 13 3 28.41 1.38
 3 -13 -3 28.49 1.29
 -3 -13 3 27.55 1.35
 3 13 3 27.56 1.28
 -3 13 -3 30.42 1.57
 4 13 -3 1.27 0.48
 -4 -13 -3 0.91 0.32
 -4 -13 3 1.65 0.47
 -4 13 -3 1.21 0.4
 4 13 3 1.24 0.38
 -4 13 -3 0.68 0.39
 -5 -13 -3 2.08 0.48
 5 13 -3 1.35 0.54
 5 13 3 1.93 0.52
 -5 13 -3 1.25 0.46
 -5 -13 3 0.93 0.42
 6 13 -3 5.41 1
 -6 -13 -3 4.09 0.69
 -6 13 -3 4.28 0.83
 -6 -13 3 3.93 0.74
 6 13 3 5.25 0.85
 0 14 3 29.48 1.16
 0 14 3 30.31 1.06
 0 14 -3 32.25 1.47
 0 14 -3 32.59 1.35
 -1 -14 -3 2.46 0.35
 1 14 -3 3.22 0.48
 -1 14 3 3.17 0.36
 1 14 -3 2.35 0.49
 -1 14 3 2.36 0.32
 -1 14 3 2.75 0.39
 1 14 3 2.23 0.26
 1 14 3 2.59 0.36
 1 -14 -3 3.17 0.42
 -1 14 -3 2.08 0.47
 -1 14 -3 2.31 0.42
 2 -14 3 4.25 0.59
 -2 -14 -3 4.34 0.47
 2 14 -3 3.84 0.61
 -2 14 3 4.32 0.54
 -2 -14 -3 3.5 0.4
 -2 14 3 4.26 0.49
 -2 14 3 4.15 0.51
 2 -14 -3 4.25 0.5
 -2 14 -3 4.34 0.68
 2 14 3 4.35 0.49
 -2 14 -3 3.18 0.49
 2 14 3 4.31 0.35
 -2 -14 3 4.43 0.59
 -3 -14 -3 5.58 0.51
 -3 14 3 5.75 0.7
 3 14 -3 5.14 0.77
 -3 14 3 5.56 0.7
 -3 14 3 4.51 0.55
 3 -14 -3 4.86 0.58
 -3 14 -3 5.06 0.69
 -3 -14 3 4.53 0.61
 -3 14 -3 4.89 0.76
 3 14 3 6.28 0.69
 -4 -14 -3 0.42 0.27
 4 14 -3 0.8 0.46
 -4 14 3 0.98 0.4
 -4 -14 3 0.73 0.34
 -4 14 -3 0.33 0.44
 -4 14 -3 1.38 0.41
 4 14 3 1.01 0.38
 -5 -14 -3 5.33 0.66
 5 14 -3 5.19 0.93
 -5 -14 3 4.55 0.71
 -5 14 -3 5.18 0.9
 5 14 3 4.66 0.72
 0 15 -3 0.27 0.29
 0 15 -3 0.32 0.22
 0 15 3 0.48 0.22
 0 15 3 0.41 0.15
 -1 15 3 4.52 0.41
 1 15 -3 3.81 0.49
 1 15 -3 3.78 0.59
 -1 15 3 4.72 0.53
 -1 15 3 4.37 0.39
 -1 -15 -3 4.56 0.49
 -1 15 -3 5.1 0.7
 -1 15 -3 3.54 0.5
 1 15 3 3.94 0.32
 1 15 3 4.63 0.48
 -2 15 3 0.13 0.24
 -2 -15 -3 0.23 0.19
 2 15 -3 -0.19 0.26
 2 -15 3 -0.22 0.2
 -2 15 3 0.28 0.21
 -2 15 3 0.08 0.17
 -2 15 -3 -0.15 0.24
 2 15 3 0.27 0.21
 -2 15 -3 0.14 0.24
 2 -15 -3 -0.06 0.18
 -2 -15 3 0.21 0.24
 2 15 3 0.22 0.15
 3 15 -3 13.67 1.07
 -3 15 3 12.4 0.92
 -3 -15 -3 11.25 0.72
 3 15 3 12.23 0.82
 -3 -15 3 11.88 0.88
 -3 15 -3 11.88 1
 3 -15 -3 11.74 0.84
 4 15 -3 1.82 0.57
 -4 -15 -3 1.22 0.34
 -4 15 3 1.2 0.46
 -4 15 -3 1.16 0.51
 -4 -15 3 1.4 0.43
 4 15 3 1.34 0.43
 -5 15 3 1.63 0.51
 5 15 -3 1.43 0.58
 -5 -15 -3 1.82 0.46
 5 15 3 1.94 0.52
 -5 -15 3 1.06 0.4
 -5 15 -3 1.92 0.61
 0 16 3 7.03 0.55
 0 16 -3 6.51 0.78
 0 16 -3 7.95 0.67
 0 16 3 7.36 0.46
 -1 16 3 2.11 0.39
 1 16 -3 1.71 0.48
 -1 16 3 2.65 0.34
 1 16 3 2.55 0.39
 -1 16 -3 2.25 0.51
 -2 16 3 0.95 0.29
 -2 16 3 0.79 0.32
 2 16 -3 1.11 0.4
 -2 -16 3 0.83 0.31
 2 16 3 1.16 0.32
 -2 16 -3 1.3 0.45
 2 -16 -3 0.94 0.31
 -3 16 3 8.22 0.76
 3 16 -3 6.93 0.93
 -3 -16 -3 6.45 0.57
 -3 -16 3 7.95 0.86
 -3 16 -3 6.5 0.89
 3 16 3 7.19 0.74
 4 16 -3 0.2 0.4
 -4 -16 -3 0.62 0.28
 -4 16 3 -0.14 0.27
 -4 -16 3 0.72 0.38
 -4 16 -3 0.63 0.38
 4 16 3 0.46 0.3
 0 17 -3 0.31 0.31
 0 17 3 0.13 0.22
 -1 17 3 4.14 0.51
 1 17 -3 3.97 0.66
 -1 17 3 4.31 0.45
 1 17 3 3.8 0.48
 -1 17 -3 4.06 0.66
 2 17 -3 1.98 0.52
 -2 17 3 2.54 0.47
 2 17 3 2.91 0.46
 -2 -17 3 2.2 0.47
 -2 17 -3 2.76 0.59
 3 17 -3 4.24 0.76
 -3 17 3 4.64 0.67
 -3 -17 -3 3.62 0.5
 3 17 3 5.01 0.63
 -3 -17 3 4.73 0.69
 -3 17 -3 4.85 0.8
 -4 17 3 11.26 0.99
 4 17 -3 11.65 1.29
 -4 -17 -3 10.95 0.81
 4 17 3 11.13 0.9
 -4 17 -3 10.95 1.24
 -4 -17 3 9.91 0.91
 0 18 -3 2.31 0.52
 0 18 3 2.38 0.4
 -1 18 3 3.11 0.49
 1 18 -3 3.57 0.65
 1 18 3 1.83 0.38
 -1 18 -3 3.25 0.64
 2 18 -3 1.06 0.44
 -2 18 3 1.01 0.36
 -2 18 -3 0.41 0.39
 2 18 3 0.46 0.28
 -3 -18 -3 -0.11 0.17
 3 18 -3 0.75 0.47
 -3 18 3 0.69 0.36
 3 18 3 0.52 0.3
 -3 -18 3 0.28 0.31
 -3 18 -3 0.45 0.4
 0 19 3 5.03 0.58
 0 19 -3 4.57 0.74
 1 19 -3 1.02 0.45
 -1 19 3 1.73 0.4
 -1 19 -3 0.79 0.39
 1 19 3 0.92 0.31
 -2 19 3 -0.05 0.26
 2 19 -3 0.57 0.4
 2 19 3 0.28 0.26
 -2 19 -3 0.41 0.37
 0 20 -3 0.27 0.36
 0 20 3 0.03 0.22
 1 20 -3 6.52 0.9
 -1 20 3 6.08 0.68
 -1 20 -3 5.79 0.85
 1 20 3 6.78 0.59
 0 0 -4 313.34 8.33
 0 0 4 307.8 8.02
 0 0 -4 312.61 8.26
 -1 0 -4 101.63 2.82
 -1 0 4 103.37 2.85
 -1 0 -4 105.32 2.88
 1 0 -4 101.03 2.93
 1 0 -4 103.82 2.85
 -1 0 4 103.88 2.92
 1 0 4 105.29 2.82
 2 0 4 8.42 0.49
 -2 0 4 8.76 0.52
 2 0 -4 9.23 0.55
 -2 0 -4 8.7 0.51
 -2 0 4 8.72 0.6
 2 0 -4 8.92 0.62
 3 0 4 19.98 0.9
 3 0 -4 16.19 0.99
 -3 0 4 17.67 0.91
 -3 0 -4 18.54 0.96
 -3 0 -4 18.51 0.89
 -3 0 4 21.41 1.08
 3 0 -4 20.4 0.97
 -5 0 4 -0.04 0.25
 -5 0 -4 -0.15 0.24
 5 0 -4 0.21 0.38
 5 0 4 0.18 0.25
 5 0 -4 0.09 0.25
 -6 0 4 2.8 0.61
 -6 0 -4 1.93 0.54
 6 0 -4 3.02 0.69
 6 0 -4 2.28 0.53
 -7 0 -4 3.55 0.73
 -7 0 4 2.97 0.67
 7 0 -4 2.13 0.62
 0 1 4 59.04 1.67
 0 1 -4 58.31 1.75
 0 -1 4 59.7 1.7
 0 1 -4 61.55 1.71
 0 -1 -4 58.16 1.64
 0 -1 4 61.28 1.76
 0 -1 -4 60.03 1.68
 0 1 4 59.27 1.63
 1 1 -4 159.2 4.39
 1 1 -4 161.9 4.31
 -1 1 4 160.88 4.33
 1 -1 4 154.83 4.26
 -1 -1 -4 159.8 4.21
 1 1 4 157.97 4.2
 1 -1 -4 162.8 4.35
 -1 1 -4 162.66 4.28
 -1 -1 4 163.07 4.38
 1 -1 -4 160.37 4.26
 -1 1 -4 163.2 4.36
 -1 -1 4 158.97 4.29
 2 1 -4 43.62 1.5
 2 -1 4 45.45 1.46
 2 1 -4 45.74 1.63
 -2 -1 -4 42.86 1.43
 -2 -1 -4 44.08 1.46
 -2 1 4 45.55 1.6
 -2 1 4 42.41 1.46
 -2 1 -4 42.82 1.46
 -2 -1 4 41.25 1.47
 2 1 4 42.91 1.4
 2 -1 -4 44.73 1.49
 -2 -1 4 46.25 1.61
 2 -1 -4 45.69 1.6
 -3 -1 -4 77.5 2.48
 -3 1 4 73.99 2.56
 -3 1 4 76.13 2.42
 -3 -1 -4 71.39 2.35
 3 1 -4 75.41 2.43
 3 -1 4 76.9 2.38
 3 1 -4 71.14 2.54
 -3 1 -4 74.36 2.39
 3 -1 -4 73.27 2.55
 3 1 4 73.58 2.32
 -3 1 -4 73.05 2.45
 3 -1 -4 75.7 2.41
 -3 -1 4 76.27 2.43
 -3 -1 4 74.24 2.56
 -4 -1 -4 11.58 0.79
 4 1 -4 12.95 0.85
 -4 1 4 12.06 0.92
 -4 -1 -4 12.89 0.91
 -4 1 4 12.95 0.85
 4 1 -4 12.49 0.94
 4 -1 4 13.13 0.82
 4 1 4 12.48 0.79
 -4 1 -4 12.12 0.82
 4 -1 -4 11.63 0.82
 -4 1 -4 13.63 0.92
 -4 -1 4 11.45 0.81
 -4 -1 4 13.44 0.96
 4 -1 -4 11.41 0.9
 5 1 -4 21.73 1.23
 -5 1 4 20.08 1.18
 5 -1 4 19.3 1.13
 -5 -1 -4 20.28 1.18
 -5 1 4 21.14 1.34
 5 1 -4 17.7 1.29
 5 1 4 20.49 1.13
 -5 -1 4 18.66 1.16
 -5 1 -4 18.31 1.13
 5 -1 -4 21.97 1.38
 5 -1 -4 21.29 1.21
 -6 -1 -4 16.01 1.15
 6 1 -4 17.12 1.19
 6 1 -4 15.91 1.31
 -6 1 4 17.08 1.2
 6 -1 -4 16.01 1.16
 -6 -1 4 17.56 1.2
 -6 1 -4 16.88 1.2
 6 -1 -4 16.93 1.29
 -7 -1 -4 0.5 0.42
 -7 1 4 0.93 0.43
 7 1 -4 1.31 0.55
 -7 -1 4 1.43 0.48
 7 -1 -4 0.43 0.43
 -7 1 -4 0.75 0.49
 0 -2 4 331.28 8.69
 0 2 -4 342.61 8.63
 0 -2 4 328.23 8.62
 0 -2 -4 337.62 8.57
 0 2 -4 338.73 8.7
 0 2 4 332.67 8.61
 0 -2 -4 336.16 8.52
 -1 2 4 55.16 1.71
 -1 -2 -4 56.37 1.59
 -1 2 4 56.23 1.64
 1 -2 4 54.85 1.76
 1 2 -4 57.28 1.81
 1 2 -4 57.26 1.74
 1 -2 4 58.15 1.71
 1 -2 -4 56.05 1.72
 1 2 4 54.57 1.57
 -1 -2 4 56.09 1.72
 -1 2 -4 58.11 1.72
 -1 -2 4 59.32 1.81
 -1 2 -4 56.61 1.79
 1 -2 -4 58.09 1.66
 2 2 -4 14.68 0.72
 2 2 -4 15.22 0.82
 2 -2 4 15.03 0.7
 -2 2 4 13.99 0.76
 -2 -2 -4 14.52 0.68
 -2 -2 -4 13.84 0.63
 2 2 4 13.69 0.62
 2 -2 -4 14.73 0.77
 -2 2 -4 13.24 0.69
 -2 -2 4 14.39 0.78
 2 -2 -4 13.43 0.68
 -2 -2 4 14.2 0.71
 3 2 -4 5.57 0.65
 3 -2 4 7.42 0.55
 3 2 -4 5.78 0.53
 -3 2 4 7.14 0.65
 -3 -2 -4 7.59 0.59
 -3 2 4 5.86 0.51
 -3 -2 -4 7.09 0.52
 -3 -2 4 6.5 0.61
 3 2 4 6.2 0.48
 -3 -2 4 6.39 0.54
 -3 2 -4 6.27 0.54
 -3 2 -4 6.23 0.56
 3 -2 -4 5.21 0.6
 3 -2 -4 6.03 0.52
 4 2 -4 38.84 1.82
 4 -2 4 38.61 1.62
 -4 -2 -4 41.02 1.62
 -4 -2 -4 41.62 1.76
 4 2 -4 42.37 1.71
 -4 2 4 41.38 1.67
 -4 2 4 39.48 1.81
 -4 -2 4 42.66 1.86
 -4 -2 4 39.65 1.66
 4 2 4 43.29 1.61
 4 2 4 40.23 1.57
 4 -2 -4 38.92 1.64
 -4 2 -4 42.54 1.8
 4 -2 -4 37.11 1.77
 -4 2 -4 40.95 1.67
 -5 2 4 8.76 0.78
 5 2 -4 7.39 0.95
 -5 -2 -4 9.14 0.8
 5 -2 4 8.22 0.75
 -5 2 4 9.04 1.04
 5 2 -4 10.39 0.85
 5 -2 -4 9.23 1.01
 5 -2 -4 8.88 0.8
 -5 2 -4 10.82 0.87
 -5 -2 4 8.67 0.8
 5 2 4 9.11 0.76
 -6 2 4 14.76 1.1
 6 2 -4 14.82 1.09
 6 2 -4 12.87 1.22
 -6 -2 -4 13.51 1.08
 -6 -2 4 16.03 1.14
 -6 2 -4 15.83 1.16
 6 -2 -4 15.57 1.23
 6 2 4 13.63 1.04
 6 -2 -4 16.2 1.16
 -7 -2 -4 2.05 0.6
 7 2 -4 1.08 0.55
 -7 2 -4 1.27 0.57
 7 -2 -4 2.02 0.61
 -7 -2 4 0.57 0.4
 0 3 -4 1.18 0.22
 0 -3 -4 0.5 0.11
 0 3 -4 0.65 0.19
 0 -3 4 1.01 0.23
 0 -3 -4 0.72 0.1
 0 -3 4 0.6 0.16
 0 3 4 0.89 0.11
 -1 -3 -4 43.91 1.24
 -1 3 4 40.77 1.28
 1 -3 4 43.4 1.47
 1 3 -4 43.31 1.4
 -1 -3 -4 42.07 1.22
 1 3 -4 42.51 1.47
 -1 3 4 44.56 1.36
 1 -3 4 41.38 1.38
 1 3 4 42.03 1.2
 -1 3 -4 42.75 1.4
 1 -3 -4 43.89 1.37
 -1 3 -4 43.95 1.48
 -1 -3 4 42.69 1.46
 -1 -3 4 42.9 1.4
 1 -3 -4 43.96 1.31
 -2 -3 -4 5.76 0.38
 2 -3 4 5.47 0.44
 -2 3 4 4.93 0.45
 -2 -3 -4 4.79 0.4
 2 3 -4 5.33 0.44
 2 3 -4 5.79 0.52
 -2 3 -4 5.04 0.44
 2 3 4 5.62 0.36
 -2 -3 4 6.08 0.51
 2 -3 -4 5.81 0.43
 2 -3 -4 5.56 0.49
 -2 -3 4 5.79 0.47
 -3 -3 -4 3.61 0.41
 -3 3 4 4.52 0.58
 3 3 -4 4.16 0.5
 -3 -3 -4 5.1 0.57
 3 -3 4 5.1 0.53
 3 3 -4 3.99 0.56
 -3 3 4 4.13 0.48
 -3 -3 4 4.4 0.5
 -3 3 -4 5.31 0.49
 3 -3 -4 3.96 0.47
 3 -3 -4 4.34 0.58
 3 3 4 4.04 0.44
 -3 -3 4 4.83 0.58
 -3 3 -4 5.15 0.56
 3 3 4 4.63 0.41
 -4 -3 -4 1.75 0.37
 4 3 -4 1.54 0.45
 -4 -3 -4 1.78 0.41
 -4 3 4 2.09 0.47
 4 -3 4 1.16 0.36
 -4 3 4 1.4 0.37
 4 3 -4 1.99 0.43
 4 -3 -4 0.83 0.37
 4 3 4 1.45 0.34
 4 -3 -4 1.25 0.35
 -4 3 -4 1.79 0.4
 -4 3 -4 1.63 0.44
 -4 -3 4 1.59 0.43
 -4 -3 4 1.47 0.37
 4 3 4 1.44 0.33
 5 -3 4 33.96 1.56
 -5 -3 -4 32.25 1.52
 5 3 -4 33.51 1.59
 -5 3 4 33.56 1.73
 5 3 -4 29.25 1.69
 -5 3 4 30.58 1.52
 5 -3 -4 32.48 1.68
 5 -3 -4 32.56 1.56
 5 3 4 29.73 1.47
 -5 -3 4 31.49 1.56
 -5 3 -4 32.32 1.57
 -6 -3 -4 2.68 0.59
 6 -3 4 2.97 0.59
 6 3 -4 3.26 0.64
 6 3 -4 2.82 0.66
 -6 3 4 3.04 0.61
 6 -3 -4 3.34 0.58
 6 3 4 2.16 0.53
 6 -3 -4 5.33 0.89
 -6 3 -4 3.08 0.61
 -6 -3 4 2.09 0.54
 7 3 -4 0.61 0.45
 -7 -3 -4 0.48 0.42
 -7 3 -4 0.28 0.38
 7 3 4 -0.34 0.31
 7 -3 -4 -0.05 0.36
 -7 -3 4 0.54 0.48
 0 4 -4 89.71 2.58
 0 -4 4 90.61 2.65
 0 -4 -4 92 2.33
 0 -4 -4 89.2 2.31
 0 4 -4 89.48 2.64
 -1 4 4 26.37 0.96
 -1 -4 -4 27.73 0.83
 1 -4 4 27.2 1.03
 1 -4 4 29.2 1.12
 1 4 -4 27.41 1.1
 1 4 -4 29.84 1.06
 -1 -4 -4 28.48 0.87
 -1 4 4 27.56 0.9
 1 -4 -4 27.35 0.97
 1 4 4 27.55 0.8
 -1 -4 4 28.27 1.05
 1 -4 -4 28.79 0.92
 -1 4 -4 27.78 1.1
 -1 -4 4 27.42 1.08
 -1 4 -4 29.12 1.05
 2 4 -4 0.56 0.24
 2 4 -4 0.37 0.19
 -2 -4 -4 0.14 0.16
 -2 4 4 0.51 0.23
 2 -4 4 0.18 0.17
 -2 -4 -4 0.41 0.15
 -2 4 4 0.36 0.17
 2 -4 -4 0.43 0.22
 2 4 4 0.26 0.14
 2 -4 -4 0.45 0.18
 -2 4 -4 0.46 0.2
 2 4 4 0.28 0.14
 -2 -4 4 0.37 0.2
 -2 4 -4 0.36 0.22
 -2 -4 4 0.32 0.21
 -3 -4 -4 11.39 0.72
 3 -4 4 10.46 0.67
 -3 4 4 9.82 0.65
 3 4 -4 9.91 0.7
 -3 -4 -4 9.99 0.62
 -3 4 4 10.47 0.77
 3 4 -4 9.4 0.75
 -3 -4 4 10.96 0.71
 -3 4 -4 10.7 0.71
 3 4 4 10.64 0.64
 3 -4 -4 10.97 0.76
 3 4 4 11.42 0.62
 -3 -4 4 12.27 0.83
 3 -4 -4 10.18 0.66
 4 4 -4 17.72 1.16
 4 -4 4 18.12 1.01
 -4 -4 -4 16.51 0.93
 -4 -4 -4 16.62 1.04
 -4 4 4 16.13 0.96
 4 4 -4 16.9 1.01
 -4 4 4 16.74 1.12
 -4 4 -4 18.72 1.12
 -4 4 -4 15.55 0.96
 -4 -4 4 19.08 1.15
 4 -4 -4 17.22 1.07
 4 -4 -4 16.34 0.97
 4 4 4 18.17 0.92
 -4 -4 4 16.47 0.99
 4 4 4 17.72 0.95
 5 4 -4 8 0.86
 -5 4 4 7.5 0.91
 -5 4 4 8.51 0.77
 5 -4 4 9.49 0.82
 5 4 -4 9.93 1.13
 -5 -4 -4 9.63 0.8
 5 -4 -4 7.47 0.89
 5 -4 -4 8.24 0.76
 5 4 4 6.34 0.73
 -5 4 -4 9.12 0.82
 -5 -4 4 7.04 0.8
 6 -4 4 0.14 0.29
 -6 -4 -4 0.27 0.32
 6 4 -4 0.31 0.4
 -6 4 4 0.32 0.33
 6 -4 -4 0.07 0.35
 -6 -4 4 0.55 0.38
 -6 4 -4 0.36 0.32
 6 -4 -4 0.16 0.29
 6 4 4 -0.02 0.3
 7 4 -4 1.29 0.55
 -7 -4 -4 0.94 0.48
 -7 -4 4 1.41 0.51
 -7 4 -4 0.67 0.45
 7 -4 -4 1.17 0.52
 7 4 4 0.55 0.42
 0 5 -4 1.97 0.29
 0 5 -4 1.82 0.3
 0 5 -4 1.97 0.32
 0 -5 4 1.95 0.33
 -1 -5 -4 5.58 0.26
 -1 -5 -4 5.73 0.29
 1 -5 4 5.27 0.42
 -1 5 4 5.1 0.35
 1 5 -4 5.73 0.44
 -1 5 4 5.82 0.32
 1 5 -4 5.84 0.5
 1 -5 4 4.75 0.46
 1 -5 -4 5.23 0.35
 1 5 4 5.64 0.22
 -1 -5 4 5.81 0.43
 -1 5 -4 5.51 0.42
 -1 5 -4 6.33 0.49
 1 -5 -4 5.44 0.33
 -1 -5 4 6.34 0.48
 -2 5 4 1.78 0.33
 -2 -5 -4 1.46 0.22
 2 5 -4 1.82 0.32
 2 5 -4 1.84 0.37
 2 -5 4 1.61 0.3
 -2 5 4 1.4 0.25
 -2 -5 -4 1.82 0.29
 -2 -5 4 1.27 0.32
 2 5 4 1.4 0.21
 2 -5 -4 1.48 0.29
 -2 5 -4 1.61 0.32
 2 5 4 1.63 0.24
 -2 -5 4 1.43 0.29
 2 -5 -4 1.43 0.25
 -2 5 -4 1.44 0.32
 3 5 -4 23.92 1.25
 -3 -5 -4 23.83 1.02
 -3 5 4 25.44 1.22
 3 -5 4 24.89 1.12
 3 5 -4 27.51 1.19
 -3 -5 -4 23.82 1.12
 -3 5 -4 25.32 1.15
 3 -5 -4 25.06 1.1
 3 5 4 24.39 1
 -3 -5 4 23.53 1.12
 -3 -5 4 24.02 1.23
 3 -5 -4 24.68 1.18
 3 5 4 23.39 1.05
 4 5 -4 15.83 1.09
 4 5 -4 15.57 0.97
 -4 -5 -4 14.89 0.88
 -4 5 4 17.21 1.11
 -4 -5 -4 16.51 1.01
 4 -5 4 15.55 0.94
 -4 5 4 16.5 0.95
 4 5 4 13.36 0.88
 4 -5 -4 15.28 0.93
 -4 5 -4 17.69 1.07
 -4 5 -4 15.4 0.97
 -4 -5 4 15.97 0.97
 -4 -5 4 14.69 1.03
 4 -5 -4 17.17 1.04
 -5 -5 -4 23.03 1.23
 5 5 -4 20.72 1.4
 -5 5 4 23.78 1.47
 5 -5 4 23.33 1.28
 -5 5 4 22.51 1.27
 5 5 -4 25.46 1.35
 5 -5 -4 22.48 1.27
 -5 -5 4 23.37 1.31
 5 5 4 21.39 1.23
 -5 5 -4 23.17 1.33
 5 -5 -4 22.1 1.33
 -6 5 4 21.17 1.33
 6 -5 4 22.34 1.34
 -6 -5 -4 20.24 1.28
 6 5 -4 20.37 1.52
 6 5 4 19.69 1.27
 6 -5 -4 20.91 1.4
 -6 -5 4 21.02 1.35
 -6 5 -4 20.15 1.34
 7 5 -4 0.21 0.44
 -7 -5 -4 1.98 0.59
 -7 -5 4 0.71 0.42
 7 5 4 0.81 0.42
 -7 5 -4 1.51 0.5
 7 -5 -4 1.62 0.57
 0 6 -4 4.29 0.41
 0 -6 -4 4.8 0.19
 0 6 -4 4.51 0.4
 0 6 -4 4.62 0.39
 0 -6 4 5.34 0.46
 -1 6 4 101.67 2.65
 -1 -6 -4 94.97 2.54
 -1 -6 -4 98.28 2.57
 1 6 -4 96.65 2.96
 1 6 -4 100.4 2.88
 1 -6 4 99.26 2.87
 1 -6 4 97.01 2.97
 -1 -6 4 92.23 2.83
 1 6 4 93.58 2.51
 1 -6 -4 101.18 2.66
 1 6 4 94.5 2.48
 -1 6 -4 94.39 2.95
 -1 6 -4 95.77 2.86
 1 -6 -4 97.9 2.66
 -1 -6 4 97.75 2.94
 2 6 -4 44.21 1.61
 -2 6 4 46.91 1.63
 -2 -6 -4 42.09 1.4
 -2 -6 -4 49.48 1.52
 2 -6 4 44.86 1.61
 2 6 -4 44.62 1.73
 -2 6 4 45.71 1.52
 -2 -6 4 44.05 1.61
 -2 6 -4 43.79 1.72
 -2 6 -4 44.61 1.63
 2 6 4 46.67 1.39
 2 -6 -4 45.35 1.56
 2 6 4 43.05 1.44
 -2 -6 4 48.67 1.76
 2 -6 -4 49.59 1.54
 -3 -6 -4 6.53 0.5
 3 6 -4 7.55 0.61
 3 6 -4 5.38 0.66
 3 -6 4 6.65 0.58
 -3 6 4 7.2 0.65
 -3 6 4 7.18 0.55
 -3 -6 -4 7.51 0.58
 -3 6 -4 5.29 0.58
 3 -6 -4 7.15 0.56
 -3 -6 4 7.43 0.66
 3 6 4 6.93 0.54
 -3 -6 4 6.63 0.59
 3 6 4 7.44 0.49
 3 -6 -4 6.95 0.6
 -4 -6 -4 21.32 1.13
 4 6 -4 17.5 1.06
 4 -6 4 19.21 1.06
 -4 6 4 19.44 1.06
 4 6 -4 18.52 1.21
 -4 6 4 21.34 1.24
 -4 -6 -4 18.36 0.98
 -4 -6 4 18.28 1.07
 -4 6 -4 18.36 1.08
 -4 6 -4 20.23 1.18
 4 -6 -4 19.89 1.06
 4 -6 -4 17.56 1.09
 4 6 4 18.96 1.03
 -5 -6 -4 26.38 1.32
 -5 6 4 25.34 1.36
 5 6 -4 25.97 1.59
 5 -6 4 26.08 1.37
 -5 6 4 24.66 1.49
 5 -6 -4 24.58 1.34
 5 -6 -4 26.56 1.46
 5 6 4 25.69 1.36
 -5 6 -4 25.67 1.41
 -5 -6 4 27.1 1.41
 -6 -6 -4 2.36 0.54
 -6 6 4 4.2 0.72
 6 -6 4 2.57 0.58
 6 6 -4 3.21 0.77
 6 -6 -4 2.08 0.53
 -6 -6 4 4 0.71
 -6 6 -4 3.1 0.62
 6 6 4 3.04 0.6
 7 6 -4 2.62 0.74
 -7 -6 -4 1.88 0.55
 -7 -6 4 2.9 0.68
 7 -6 -4 3.71 0.73
 7 6 4 3.67 0.7
 0 -7 -4 10.45 0.37
 0 7 -4 11.6 0.64
 0 7 -4 10.78 0.62
 0 7 -4 11.55 0.68
 0 -7 4 11.55 0.67
 1 -7 4 89.46 2.6
 1 -7 4 85.51 2.69
 1 7 -4 86.09 2.58
 -1 -7 -4 83.22 2.25
 1 7 -4 79.71 2.65
 -1 -7 -4 80.95 2.23
 -1 7 4 86.42 2.34
 -1 -7 4 89.79 2.68
 -1 -7 4 81.23 2.55
 1 7 4 82.67 2.22
 1 -7 -4 85.24 2.35
 -1 7 -4 80.61 2.65
 -1 7 -4 85.11 2.58
 2 -7 4 12.48 0.71
 -2 7 4 11.28 0.6
 -2 -7 -4 11.54 0.53
 -2 -7 -4 11.55 0.59
 -2 7 4 11.39 0.68
 2 7 -4 9.42 0.73
 2 7 -4 11.93 0.7
 2 -7 -4 11.34 0.6
 2 -7 -4 10.68 0.6
 2 7 4 11.8 0.51
 -2 -7 4 11.61 0.74
 2 7 4 11.05 0.56
 -2 -7 4 12.12 0.71
 -2 7 -4 10.74 0.75
 -2 7 -4 10.72 0.68
 -3 7 4 68.15 2.21
 3 7 -4 69.46 2.31
 3 -7 4 64.68 2.26
 -3 -7 -4 70.01 2.25
 -3 7 4 64.44 2.34
 3 7 -4 64.03 2.44
 -3 -7 -4 62 2.07
 -3 7 -4 60.88 2.25
 3 -7 -4 67.69 2.24
 -3 -7 4 68.6 2.43
 -3 7 -4 66.05 2.42
 3 7 4 67.46 2.07
 3 7 4 66.09 2.17
 -3 -7 4 62.75 2.26
 3 -7 -4 66.64 2.2
 -4 -7 -4 22.36 1.08
 -4 7 4 21.69 1.28
 4 7 -4 18.7 1.24
 4 -7 4 21.48 1.16
 4 7 -4 24.21 1.23
 -4 7 -4 23.49 1.23
 4 -7 -4 22.88 1.16
 4 -7 -4 21.92 1.18
 4 7 4 19.16 1.08
 -4 7 -4 21.82 1.23
 -4 -7 4 22.72 1.2
 5 7 -4 4.06 0.74
 -5 7 4 5.39 0.73
 5 -7 4 4.16 0.67
 -5 7 4 4.38 0.77
 -5 -7 -4 4.53 0.61
 -5 -7 4 3.56 0.62
 -5 7 -4 4.42 0.7
 5 -7 -4 4.09 0.62
 5 7 4 3.96 0.61
 5 -7 -4 3.21 0.6
 6 7 -4 11.6 1.33
 -6 -7 -4 10.69 0.94
 6 -7 -4 12.52 1.06
 6 7 4 12.95 1.03
 -6 7 -4 13.38 1.09
 -6 -7 4 12.26 1.04
 7 7 -4 3.95 0.87
 -7 -7 -4 1.74 0.57
 7 -7 -4 3.22 0.72
 -7 -7 4 2.52 0.6
 7 7 4 3.48 0.7
 0 8 4 0.46 0.1
 0 8 4 0.39 0.09
 0 8 -4 0.37 0.23
 0 8 -4 0.25 0.18
 0 -8 4 0.24 0.18
 0 8 -4 0.28 0.17
 1 -8 4 13.77 0.75
 -1 -8 -4 13.37 0.48
 -1 8 4 14.06 0.56
 1 8 -4 12.03 0.77
 1 8 -4 14.83 0.76
 1 -8 4 14.31 0.83
 -1 -8 -4 13.7 0.5
 -1 -8 4 15.13 0.82
 1 -8 -4 13.57 0.57
 -1 8 -4 13.26 0.8
 -1 8 -4 12.57 0.72
 -1 -8 4 14.35 0.74
 1 8 4 14.2 0.49
 -2 8 4 8.65 0.53
 -2 -8 -4 9.39 0.53
 -2 8 4 10.33 0.64
 -2 -8 -4 8.82 0.47
 2 8 -4 9.67 0.65
 2 8 -4 7.79 0.68
 2 -8 4 10.8 0.68
 -2 -8 4 9.7 0.65
 2 8 4 9.47 0.45
 -2 -8 4 9.17 0.68
 2 8 4 8.47 0.5
 -2 8 -4 9.12 0.64
 2 -8 -4 8.93 0.55
 -2 8 -4 9.11 0.7
 -3 -8 -4 9.95 0.67
 -3 8 4 9.06 0.64
 3 -8 4 9.85 0.72
 -3 -8 -4 8.82 0.57
 3 8 -4 9.48 0.81
 3 8 -4 11.23 0.75
 -3 8 4 9.93 0.75
 3 -8 -4 9.55 0.66
 -3 8 -4 9.3 0.77
 -3 -8 4 9.66 0.71
 -3 -8 4 10.64 0.81
 -3 8 -4 10.66 0.75
 3 8 4 8.42 0.62
 4 8 -4 10.22 0.93
 -4 8 4 9.27 0.73
 -4 -8 -4 10.49 0.72
 4 -8 4 12.05 0.85
 -4 8 4 10.11 0.88
 -4 8 -4 11.67 0.86
 -4 -8 4 8.47 0.77
 4 8 4 10 0.75
 4 -8 -4 9.3 0.75
 -4 8 -4 9.12 0.79
 4 -8 -4 11.48 0.81
 5 -8 4 22.02 1.3
 -5 8 4 23.66 1.32
 5 8 -4 23.58 1.53
 -5 -8 -4 21.15 1.21
 -5 8 4 25.64 1.51
 5 8 4 23.31 1.29
 5 -8 -4 27.45 1.38
 -5 8 -4 23.89 1.38
 -5 -8 4 24.58 1.37
 5 -8 -4 24.88 1.34
 6 8 -4 0.88 0.58
 -6 -8 -4 0.94 0.42
 -6 8 -4 0.72 0.4
 6 8 4 0.92 0.4
 -6 -8 4 0.55 0.4
 -7 -8 -4 3.41 0.73
 7 8 -4 3.63 0.87
 -7 -8 4 5.93 0.91
 7 8 4 3.99 0.75
 0 9 -4 0.33 0.22
 0 9 4 0.56 0.09
 0 -9 4 0.74 0.26
 0 9 4 0.39 0.11
 0 9 4 0.5 0.09
 0 9 4 0.37 0.1
 0 9 -4 0.99 0.26
 -1 9 4 21.4 0.76
 1 -9 4 19.33 1.03
 -1 9 4 20.06 0.8
 1 9 -4 20.75 0.97
 1 9 -4 20.63 1.05
 1 -9 4 20.73 1
 -1 -9 -4 20.7 0.69
 -1 -9 -4 20.49 0.67
 -1 9 -4 19.61 1.03
 -1 -9 4 20.7 0.96
 1 -9 -4 20.12 0.77
 1 9 4 19.69 0.68
 -1 9 -4 20.96 0.97
 1 9 4 20.57 0.6
 1 9 4 19.85 0.59
 -1 -9 4 20.25 1.01
 2 9 -4 7.05 0.57
 2 -9 4 6.44 0.56
 2 9 -4 6.88 0.76
 -2 -9 -4 6.06 0.39
 -2 9 4 5.65 0.49
 -2 -9 -4 6.51 0.44
 -2 9 4 5.64 0.43
 -2 -9 4 5.97 0.55
 2 9 4 6.22 0.36
 2 9 4 5.48 0.42
 -2 9 -4 7.05 0.66
 -2 9 -4 6.06 0.54
 -2 -9 4 6.12 0.58
 2 -9 -4 6.23 0.47
 3 -9 4 12.09 0.81
 -3 -9 -4 9.8 0.61
 -3 9 4 11.37 0.7
 -3 -9 -4 10.96 0.7
 -3 9 4 11.72 0.81
 3 9 -4 11.89 0.8
 3 9 -4 10.36 0.88
 -3 9 -4 10.34 0.77
 3 -9 -4 10.17 0.68
 -3 -9 4 11.05 0.78
 3 9 4 11.15 0.69
 -3 9 -4 11.75 0.88
 -4 9 4 0.08 0.22
 -4 9 4 0.34 0.23
 -4 -9 -4 0.14 0.21
 4 9 -4 0.54 0.37
 4 -9 4 0.31 0.27
 -4 9 -4 -0.22 0.18
 -4 -9 4 0.45 0.3
 4 -9 -4 0.63 0.29
 4 9 4 0.14 0.24
 -4 9 -4 0.1 0.27
 -4 9 -4 0.14 0.26
 5 9 -4 -0.24 0.32
 -5 9 4 0.83 0.44
 -5 -9 -4 0.62 0.33
 5 -9 4 0.55 0.34
 -5 -9 4 0.98 0.4
 -5 9 -4 0.48 0.31
 5 9 4 0.81 0.38
 5 -9 -4 0.51 0.31
 -6 -9 -4 1.88 0.49
 6 9 -4 1.69 0.64
 6 9 4 1.46 0.46
 -6 -9 4 0.7 0.42
 7 9 -4 3.4 0.86
 -7 -9 -4 2.6 0.63
 7 9 4 3.74 0.73
 -7 -9 4 4.08 0.76
 0 10 -4 19.99 1.05
 0 -10 4 22.49 1.09
 0 10 4 22.58 0.67
 0 10 4 21.1 0.72
 0 10 4 20.68 0.69
 0 10 4 21.53 0.67
 0 10 -4 23.01 1.02
 1 10 -4 0.8 0.27
 1 -10 4 1.12 0.33
 1 -10 4 1.03 0.31
 -1 -10 -4 0.61 0.13
 -1 10 4 0.68 0.19
 1 10 -4 0.64 0.31
 -1 10 4 0.55 0.15
 -1 -10 -4 0.77 0.15
 1 -10 -4 0.97 0.19
 -1 10 -4 1.27 0.33
 -1 -10 4 1.22 0.34
 -1 10 -4 0.8 0.25
 1 10 4 0.91 0.11
 -1 -10 4 0.68 0.24
 1 10 4 0.64 0.14
 1 10 4 0.73 0.11
 -1 10 -4 0.54 0.21
 2 10 -4 0.32 0.27
 2 -10 4 0.08 0.2
 -2 -10 -4 0.09 0.15
 2 10 -4 -0.03 0.17
 -2 10 4 0.12 0.18
 -2 10 4 0.2 0.15
 -2 -10 -4 -0.04 0.13
 2 -10 -4 0.32 0.17
 2 10 4 -0.05 0.13
 -2 10 -4 0.04 0.19
 -2 10 -4 0.05 0.22
 -2 -10 4 0.04 0.2
 -2 -10 4 -0.07 0.2
 -3 -10 -4 0.09 0.19
 -3 -10 -4 0.15 0.17
 3 10 -4 -0.01 0.27
 3 -10 4 0.38 0.25
 -3 10 4 -0.15 0.15
 -3 10 4 0.22 0.23
 3 -10 -4 -0.03 0.19
 -3 -10 4 0.09 0.24
 3 10 4 0.06 0.19
 -3 10 -4 -0.2 0.18
 -3 10 -4 0.36 0.32
 4 -10 4 6 0.73
 -4 -10 -4 4.56 0.55
 4 10 -4 3.24 0.69
 -4 10 4 4.48 0.69
 -4 10 4 4 0.54
 -4 10 -4 4.55 0.69
 4 10 4 4.31 0.57
 -4 -10 4 3.56 0.57
 4 -10 -4 4.87 0.62
 -4 10 -4 3.61 0.58
 -4 10 -4 4.92 0.7
 -5 -10 -4 2.18 0.45
 -5 10 4 3.77 0.7
 5 10 -4 2.1 0.62
 -5 -10 4 3.18 0.59
 5 10 4 3.74 0.61
 -5 10 -4 2.97 0.59
 -6 -10 -4 6.16 0.79
 6 10 -4 6.19 1.04
 6 10 4 6.65 0.86
 -6 -10 4 6.19 0.86
 0 11 -4 16.25 0.96
 0 -11 4 17.97 0.98
 0 11 -4 17.08 0.89
 0 11 4 17.03 0.58
 0 11 4 16.55 0.65
 0 11 4 17.5 0.58
 0 11 -4 18.29 0.92
 -1 11 4 8.38 0.44
 1 -11 4 7.8 0.68
 -1 11 4 7.3 0.48
 1 11 -4 8.77 0.64
 -1 -11 -4 8.47 0.42
 1 11 -4 7.8 0.69
 1 11 4 7.63 0.4
 -1 11 -4 9.21 0.65
 -1 11 -4 8.23 0.7
 -1 -11 4 7.97 0.62
 1 11 4 8.54 0.34
 1 11 4 7.4 0.32
 -1 -11 4 9.18 0.7
 1 -11 -4 7.89 0.47
 -2 -11 -4 0.6 0.2
 -2 11 4 0.47 0.19
 -2 -11 -4 0.4 0.17
 2 -11 4 0.31 0.24
 -2 11 4 0.5 0.22
 2 11 -4 0.73 0.34
 -2 11 4 0.4 0.21
 -2 11 -4 0.29 0.25
 2 11 4 0.35 0.19
 -2 -11 4 0.57 0.27
 2 -11 -4 0.39 0.19
 -2 11 -4 0.44 0.23
 -3 -11 -4 2.43 0.35
 3 11 -4 2.15 0.51
 -3 -11 -4 2.99 0.43
 3 -11 4 1.75 0.4
 -3 11 4 2.36 0.46
 -3 11 4 2.54 0.41
 -3 11 -4 2.21 0.43
 -3 -11 4 2.57 0.47
 3 11 4 2.76 0.42
 3 -11 -4 2.99 0.44
 -3 11 -4 2.75 0.52
 -4 11 4 2.97 0.59
 4 11 -4 2.74 0.62
 4 -11 4 2.62 0.52
 -4 11 4 3.33 0.5
 -4 -11 -4 3.83 0.49
 4 -11 -4 3.59 0.55
 -4 -11 4 2.83 0.57
 4 11 4 3.4 0.53
 -4 11 -4 5.08 0.7
 -4 11 -4 2.92 0.63
 -4 11 -4 3.41 0.57
 5 11 -4 1.98 0.6
 -5 11 4 2.06 0.57
 -5 -11 -4 3.03 0.52
 5 11 4 2.74 0.54
 -5 -11 4 2.44 0.56
 -5 11 -4 2.88 0.67
 -6 -11 -4 7.85 0.93
 6 11 -4 5.73 0.99
 6 11 4 6.99 0.91
 -6 -11 4 8 1.01
 0 12 4 3.17 0.29
 0 12 -4 3.27 0.52
 0 12 -4 3.03 0.44
 0 12 4 3.05 0.23
 1 12 -4 6.05 0.7
 -1 12 4 6.01 0.44
 1 12 -4 5.34 0.62
 -1 12 4 5.58 0.38
 -1 -12 -4 5.44 0.37
 1 12 4 5.97 0.29
 -1 -12 4 5.82 0.55
 -1 12 -4 5.04 0.57
 -1 12 -4 5.55 0.66
 1 -12 -4 5.76 0.42
 1 12 4 5.52 0.36
 -2 12 4 8.05 0.61
 -2 12 4 8.52 0.54
 2 -12 4 7.91 0.67
 -2 -12 -4 7.7 0.5
 -2 12 4 7.7 0.59
 -2 -12 -4 7.97 0.47
 2 12 -4 5.53 0.73
 -2 12 -4 6.96 0.78
 2 12 4 7.27 0.49
 2 -12 -4 8.11 0.57
 -2 -12 4 7.47 0.64
 -3 -12 -4 6.18 0.54
 -3 -12 -4 5.04 0.46
 -3 12 4 6.16 0.64
 -3 12 4 6.21 0.71
 3 -12 4 6.02 0.69
 3 12 -4 4.93 0.73
 3 -12 -4 6.2 0.56
 -3 12 -4 6.57 0.82
 -3 12 -4 5.77 0.68
 -3 -12 4 5.58 0.65
 3 12 4 6.29 0.56
 -4 12 4 3.97 0.59
 4 12 -4 5.78 0.82
 -4 12 4 3.89 0.63
 -4 -12 -4 4.37 0.51
 -4 12 -4 3.6 0.6
 -4 12 -4 2.88 0.56
 4 -12 -4 2.46 0.47
 -4 -12 4 4.19 0.62
 5 12 -4 9.1 1.15
 -5 -12 -4 7.76 0.72
 -5 12 -4 6.64 0.97
 5 12 4 7.14 0.82
 -5 -12 4 7.91 0.94
 6 12 -4 5.17 0.93
 -6 -12 -4 4.5 0.67
 6 12 4 4.75 0.73
 -6 12 -4 3.1 0.73
 -6 -12 4 5.04 0.79
 0 13 4 13.51 0.63
 0 13 4 14.45 0.56
 0 13 -4 14.04 0.94
 0 13 -4 16.23 0.89
 -1 13 4 31.63 1.17
 1 13 -4 29.04 1.46
 -1 -13 -4 31.48 1.1
 1 13 -4 32.73 1.39
 -1 13 4 31.4 1.1
 1 -13 -4 31.95 1.17
 -1 13 -4 30.86 1.48
 -1 13 -4 30.49 1.37
 1 13 4 29.72 1.06
 1 13 4 31.59 0.95
 2 -13 4 6.28 0.68
 -2 -13 -4 6.82 0.47
 -2 13 4 6.43 0.54
 -2 13 4 6.63 0.49
 2 13 -4 5.4 0.73
 -2 -13 -4 6.03 0.43
 -2 13 4 6.73 0.56
 2 13 4 6 0.36
 2 13 4 5.95 0.47
 2 -13 -4 7.11 0.54
 -2 -13 4 6.91 0.72
 -2 13 -4 5.83 0.73
 -3 13 4 2.19 0.39
 -3 13 4 3.41 0.54
 -3 13 4 2.56 0.48
 3 -13 4 3.55 0.58
 -3 -13 -4 2.09 0.36
 3 13 -4 2.76 0.61
 3 13 4 2.78 0.43
 -3 -13 4 2.09 0.45
 -3 13 -4 3.3 0.56
 3 -13 -4 3.43 0.5
 -3 13 -4 3.38 0.67
 -4 -13 -4 0.6 0.26
 4 13 -4 0.7 0.44
 -4 -13 4 0.08 0.29
 4 13 4 0.28 0.28
 -4 13 -4 0.68 0.41
 -5 -13 -4 1.63 0.41
 5 13 -4 1.99 0.62
 5 13 4 2.83 0.56
 -5 -13 4 2.12 0.54
 -5 13 -4 2.7 0.66
 6 13 -4 0.96 0.5
 -6 -13 -4 1.16 0.44
 -6 -13 4 1.35 0.5
 -6 13 -4 1.36 0.53
 0 14 4 7.82 0.4
 0 14 -4 7.78 0.84
 0 14 -4 7.76 0.64
 0 14 4 7.88 0.47
 1 14 -4 40.16 1.62
 -1 14 4 40.43 1.34
 -1 14 4 38.43 1.4
 -1 -14 -4 39.46 1.35
 1 14 -4 40.26 1.78
 1 14 4 37.8 1.3
 1 -14 -4 41.7 1.44
 -1 14 -4 38.87 1.76
 -1 14 -4 38.5 1.63
 1 14 4 40.07 1.18
 -2 14 4 2.74 0.4
 2 -14 4 2.67 0.51
 -2 14 4 2.94 0.38
 -2 -14 -4 2.52 0.32
 2 14 -4 2.77 0.57
 -2 -14 -4 3.08 0.38
 -2 14 4 2.52 0.43
 -2 14 -4 2.14 0.48
 2 14 4 2.64 0.35
 2 14 4 2.43 0.26
 -2 14 -4 2.92 0.49
 2 -14 -4 2.91 0.42
 -2 -14 4 3.22 0.51
 -3 -14 -4 6.29 0.52
 3 14 -4 6.54 0.88
 -3 14 4 6.32 0.73
 -3 14 4 5.98 0.56
 -3 14 -4 7.24 0.91
 3 14 4 7.26 0.6
 3 -14 -4 7.22 0.62
 -3 -14 4 7.1 0.76
 -4 -14 -4 1.67 0.39
 4 14 -4 1.45 0.55
 4 14 4 2.15 0.45
 -4 -14 4 1.73 0.48
 -4 14 -4 1.98 0.52
 -5 -14 -4 2.97 0.54
 5 14 -4 2.18 0.66
 5 14 4 1.62 0.44
 -5 -14 4 1.74 0.5
 -5 14 -4 2.32 0.66
 0 15 4 2.76 0.29
 0 15 -4 2.39 0.51
 0 15 -4 2.74 0.47
 1 15 -4 0.36 0.31
 -1 15 4 0.18 0.12
 -1 15 4 0.48 0.22
 -1 -15 -4 0.25 0.16
 -1 15 4 0.55 0.18
 1 15 -4 0.06 0.2
 1 15 4 0.43 0.18
 -1 15 -4 0.35 0.34
 -1 15 -4 0.57 0.27
 -2 -15 -4 12.46 0.65
 2 15 -4 11.44 0.99
 -2 15 4 12.23 0.69
 -2 15 4 12.99 0.81
 -2 -15 4 11.99 0.86
 2 15 4 11.97 0.67
 -2 15 -4 12.8 1
 2 -15 -4 12.95 0.76
 -3 15 4 6.37 0.75
 -3 -15 -4 5.87 0.51
 3 15 -4 4.98 0.79
 -3 15 -4 7.62 0.94
 -3 -15 4 5.69 0.71
 3 -15 -4 6.5 0.69
 3 15 4 5.65 0.61
 -4 15 4 0.6 0.36
 -4 -15 -4 0.72 0.27
 4 15 -4 0.41 0.41
 -4 -15 4 0.65 0.38
 -4 15 -4 1.19 0.47
 4 15 4 1.43 0.39
 -5 -15 -4 1.1 0.37
 5 15 -4 1.38 0.58
 -5 -15 4 0.92 0.42
 -5 15 -4 1.43 0.59
 5 15 4 0.92 0.39
 0 16 -4 14.46 1.02
 0 16 4 14.42 0.71
 -1 16 4 1.01 0.28
 -1 -16 -4 1.26 0.26
 1 16 -4 1.52 0.48
 -1 16 4 0.93 0.22
 1 16 4 1.14 0.25
 -1 16 -4 0.9 0.41
 -2 16 4 0.08 0.22
 -2 16 4 0.1 0.16
 2 16 -4 0.31 0.35
 2 -16 -4 -0.25 0.15
 2 16 4 0.03 0.18
 -2 16 -4 0.94 0.43
 -2 -16 4 0.04 0.24
 -3 16 4 1.2 0.39
 -3 -16 -4 1.61 0.34
 3 16 -4 0.48 0.41
 -3 16 -4 0.79 0.41
 3 16 4 1.33 0.35
 -3 -16 4 0.99 0.34
 -4 -16 -4 7.09 0.64
 4 16 -4 5.7 0.91
 -4 16 4 6.46 0.83
 -4 16 -4 5.15 0.83
 4 16 4 8.78 0.74
 -4 -16 4 5.71 0.78
 0 17 -4 8.82 0.83
 0 17 4 6.27 0.48
 -1 17 4 6.95 0.56
 1 17 -4 6.79 0.89
 1 17 4 7.43 0.5
 -1 17 -4 7.94 0.94
 2 17 -4 7.39 0.94
 -2 17 4 8.7 0.69
 -2 -17 4 8.11 0.87
 2 -17 -4 7.05 0.63
 2 17 4 9.08 0.59
 -2 17 -4 9.06 1.01
 3 17 -4 -0.24 0.35
 -3 -17 -4 0.49 0.22
 -3 17 4 0.79 0.32
 -3 -17 4 0.61 0.34
 3 17 4 1.01 0.32
 -3 17 -4 0.66 0.39
 -4 -17 -4 1.93 0.41
 -4 17 4 2.44 0.57
 4 17 -4 1.69 0.6
 -4 17 -4 0.8 0.49
 -4 -17 4 2.93 0.64
 4 17 4 3 0.51
 0 18 4 4.83 0.44
 0 18 -4 4.87 0.75
 1 18 -4 3.38 0.68
 -1 18 4 4.01 0.48
 1 18 4 3.7 0.42
 -1 18 -4 3.72 0.69
 -2 18 4 0.29 0.25
 2 18 -4 0.06 0.32
 -2 18 -4 0.3 0.36
 2 18 4 0.79 0.26
 3 18 -4 7.25 1.01
 -3 -18 -4 7.77 0.59
 -3 18 4 8.09 0.76
 -3 18 -4 7.99 1.03
 -3 -18 4 8.9 0.84
 3 18 4 7.97 0.64
 0 19 -4 0.43 0.36
 -1 19 4 1.67 0.36
 1 19 -4 2.38 0.59
 1 19 4 2.35 0.36
 -1 19 -4 3.19 0.67
 2 19 -4 0.79 0.44
 -2 19 4 0.9 0.35
 -2 19 -4 1.95 0.54
 2 19 4 1.39 0.31
 0 20 -4 4.51 0.77
 0 20 4 6.62 0.54
 0 0 -5 0.03 0.13
 0 0 -5 0.03 0.12
 0 0 5 -0.12 0.13
 0 0 5 0.01 0.08
 -1 0 5 62.75 1.92
 -1 0 -5 65.31 1.97
 1 0 5 67.25 1.9
 -1 0 5 65.76 2
 -1 0 -5 64.15 1.9
 1 0 -5 67.47 1.95
 1 0 -5 65.44 2.02
 2 0 -5 84.02 2.47
 -2 0 -5 79.54 2.39
 2 0 -5 81.81 2.58
 -2 0 5 81.44 2.56
 2 0 5 82.07 2.38
 -2 0 5 75.09 2.41
 -3 0 5 34.05 1.51
 -3 0 -5 35.3 1.43
 -3 0 -5 35.69 1.37
 3 0 -5 37.53 1.44
 -3 0 5 33.63 1.38
 3 0 -5 35.98 1.54
 3 0 5 34.89 1.33
 4 0 5 17.12 0.95
 4 0 -5 18.26 1.03
 -4 0 5 16.97 1.11
 -4 0 5 17.55 1.01
 -4 0 -5 18.24 1.01
 4 0 -5 15.4 1.08
 -4 0 -5 17.98 1.08
 5 0 5 12.84 0.89
 -5 0 5 11.97 0.91
 5 0 -5 11.37 1.01
 -5 0 -5 11.85 0.9
 5 0 -5 11.84 0.92
 -6 0 -5 -0.02 0.31
 6 0 -5 0.05 0.36
 6 0 -5 0.21 0.3
 -6 0 5 -0.04 0.3
 7 0 -5 0 0.35
 -7 0 5 0.28 0.34
 -7 0 -5 0.31 0.36
 0 -1 -5 -0.08 0.12
 0 1 -5 0.1 0.13
 0 1 5 -0.13 0.11
 0 -1 5 0.04 0.12
 0 1 5 0.2 0.11
 0 1 -5 0.12 0.15
 0 -1 -5 0.09 0.1
 0 -1 5 -0.06 0.16
 -1 1 5 53.58 1.69
 -1 -1 -5 54.5 1.65
 -1 -1 -5 53 1.58
 1 1 -5 54.81 1.68
 1 -1 5 51.97 1.7
 1 1 -5 53.82 1.75
 -1 1 5 53.49 1.62
 1 -1 5 55.86 1.65
 1 -1 -5 56.72 1.72
 -1 -1 5 52.98 1.66
 1 1 5 53.71 1.57
 -1 -1 5 54.53 1.75
 -1 1 -5 52.08 1.71
 1 -1 -5 55.86 1.64
 -1 1 -5 54.44 1.66
 2 -1 5 19.85 0.83
 -2 1 5 19.5 0.84
 2 1 -5 19.05 0.95
 -2 -1 -5 19.42 0.8
 -2 1 5 19.67 0.93
 2 1 -5 19.34 0.87
 2 -1 -5 21 0.88
 2 -1 -5 19.47 0.94
 -2 -1 5 20.12 0.95
 2 1 5 18.02 0.77
 -2 -1 5 18.83 0.86
 -2 1 -5 20.13 0.86
 3 1 -5 11.5 0.84
 -3 -1 -5 12.12 0.75
 -3 1 5 11.34 0.71
 3 1 -5 12.36 0.76
 -3 1 5 12.39 0.84
 -3 -1 -5 11.35 0.68
 3 -1 5 12.45 0.7
 -3 1 -5 11.76 0.72
 -3 -1 5 12.11 0.75
 3 -1 -5 12.29 0.83
 -3 1 -5 12.74 0.75
 -3 -1 5 12.76 0.84
 3 1 5 9.61 0.63
 3 -1 -5 11.68 0.73
 4 -1 5 7.31 0.64
 -4 1 5 8.59 0.71
 -4 -1 -5 9.05 0.76
 -4 -1 -5 9.78 0.72
 4 1 -5 8.85 0.71
 -4 1 5 9.13 0.83
 4 1 -5 8.87 0.81
 4 -1 -5 9.01 0.73
 -4 1 -5 8.28 0.7
 -4 -1 5 8.85 0.71
 4 1 5 9.11 0.67
 4 -1 -5 6.55 0.79
 -4 -1 5 8.6 0.8
 -4 1 -5 8.79 0.74
 -5 -1 -5 0.74 0.34
 5 1 -5 1.1 0.45
 5 1 -5 1.62 0.43
 -5 1 5 0.65 0.4
 5 -1 5 1.3 0.39
 -5 1 5 1.61 0.45
 5 -1 -5 0.54 0.34
 -5 -1 5 1.21 0.39
 5 -1 -5 1.8 0.52
 -5 1 -5 0.76 0.37
 6 1 -5 34.27 1.95
 6 1 -5 33.31 1.76
 -6 1 5 35.46 1.79
 -6 -1 -5 33.5 1.73
 6 -1 -5 37.16 1.83
 -6 1 -5 35.88 1.8
 -6 -1 5 38.64 1.84
 6 -1 -5 34.57 1.95
 7 1 -5 3.21 0.82
 -7 -1 -5 3.51 0.68
 7 -1 -5 2.9 0.75
 -7 -1 5 4.03 0.74
 -7 1 -5 4.04 0.78
 0 -2 5 279.61 7.3
 0 -2 -5 281.56 7.16
 0 -2 -5 273.64 7.2
 0 -2 5 282.88 7.38
 0 2 5 279.36 7.2
 0 2 -5 285.64 7.38
 0 2 -5 279.98 7.3
 -1 -2 -5 12.96 0.51
 1 2 -5 13.14 0.63
 -1 -2 -5 13.19 0.56
 1 -2 5 12.36 0.6
 -1 2 5 12.98 0.56
 -1 2 5 13.48 0.62
 1 2 -5 12.62 0.69
 1 -2 5 13.65 0.67
 1 -2 -5 12.95 0.63
 1 -2 -5 12.59 0.56
 1 2 5 12.78 0.5
 -1 -2 5 12.64 0.62
 -1 2 -5 13.86 0.68
 -1 2 -5 13.3 0.63
 -1 -2 5 13.75 0.69
 2 2 -5 84.74 2.72
 2 -2 5 83.68 2.53
 -2 -2 -5 90.29 2.52
 -2 -2 -5 82.41 2.46
 -2 2 5 85.15 2.65
 2 2 -5 85.87 2.59
 -2 -2 5 88.23 2.71
 -2 -2 5 82.17 2.57
 2 2 5 83.37 2.43
 2 -2 -5 86.67 2.55
 2 -2 -5 82.35 2.65
 -2 2 -5 86.82 2.57
 3 2 -5 9.9 0.78
 -3 2 5 12.26 0.82
 3 -2 5 10.87 0.68
 3 2 -5 10.38 0.71
 -3 2 5 10.86 0.69
 -3 -2 -5 10.66 0.66
 -3 -2 -5 12.6 0.75
 3 -2 -5 11.71 0.71
 -3 -2 5 11.53 0.81
 -3 -2 5 11.32 0.71
 -3 2 -5 11.8 0.72
 -3 2 -5 12.42 0.74
 3 -2 -5 10.83 0.8
 3 2 5 11.58 0.66
 4 2 -5 16.42 1.13
 -4 -2 -5 16.36 0.94
 -4 2 5 17.12 1.13
 4 -2 5 18.05 0.98
 -4 -2 -5 18.65 1.09
 -4 2 5 17.39 1
 4 2 -5 17.8 1.04
 -4 2 -5 18.88 1.09
 -4 -2 5 17.69 1.02
 4 -2 -5 16.54 0.99
 4 -2 -5 16.67 1.1
 -4 2 -5 17.59 1.01
 -4 -2 5 18.87 1.16
 4 2 5 17.84 0.93
 5 -2 5 0.94 0.36
 -5 -2 -5 0.52 0.33
 5 2 -5 0.87 0.48
 5 2 -5 0.76 0.35
 -5 2 5 0.85 0.37
 -5 2 5 0.95 0.44
 5 -2 -5 0.7 0.41
 -5 -2 5 1.07 0.36
 -5 2 -5 0.15 0.28
 5 -2 -5 0.28 0.29
 -6 -2 -5 0.14 0.32
 6 2 -5 0.39 0.4
 -6 2 5 0.4 0.36
 6 2 -5 1.28 0.42
 6 -2 -5 0.01 0.36
 -6 2 -5 -0.04 0.29
 -6 -2 5 0.39 0.37
 6 -2 -5 0.35 0.35
 7 2 -5 2 0.64
 -7 -2 -5 2.53 0.63
 7 -2 -5 3.65 0.78
 -7 -2 5 2.33 0.61
 -7 2 -5 1.87 0.56
 0 -3 -5 58.67 1.63
 0 -3 5 59.29 1.86
 0 -3 5 57.07 1.77
 0 3 -5 58.1 1.79
 0 -3 -5 58.71 1.6
 0 3 -5 59.23 1.86
 1 -3 5 76.96 2.32
 1 3 -5 73.03 2.4
 -1 3 5 78.78 2.27
 1 3 -5 79.75 2.35
 1 -3 5 78.18 2.42
 -1 -3 -5 79.13 2.14
 -1 -3 -5 78.29 2.17
 -1 3 5 77.02 2.2
 1 3 5 80.17 2.12
 -1 3 -5 80.4 2.34
 1 -3 -5 80.43 2.3
 -1 -3 5 76.53 2.34
 -1 -3 5 80.89 2.42
 1 -3 -5 79.84 2.22
 -1 3 -5 78.23 2.41
 -2 -3 -5 3.37 0.37
 2 3 -5 2.79 0.44
 -2 3 5 2.12 0.29
 -2 3 5 2.43 0.37
 2 3 -5 2.51 0.36
 -2 -3 -5 2.88 0.31
 2 -3 5 2.15 0.32
 2 -3 -5 3.64 0.4
 2 -3 -5 2.64 0.4
 -2 -3 5 1.97 0.32
 -2 3 -5 2.72 0.36
 -2 3 -5 2.24 0.37
 2 3 5 2.58 0.27
 -2 -3 5 2.52 0.39
 -3 3 5 8.66 0.61
 -3 -3 -5 8.47 0.63
 3 3 -5 10.22 0.7
 -3 -3 -5 9.59 0.6
 3 3 -5 9.42 0.76
 3 -3 5 9.34 0.63
 -3 3 5 9.24 0.73
 3 3 5 9.91 0.59
 -3 -3 5 9.61 0.68
 3 -3 -5 9.91 0.75
 -3 -3 5 10.16 0.75
 3 -3 -5 9.77 0.66
 -3 3 -5 9.38 0.66
 4 -3 5 22.09 1.12
 -4 3 5 21.79 1.13
 4 3 -5 22.52 1.18
 -4 -3 -5 21.18 1.08
 4 3 -5 20.84 1.28
 -4 -3 -5 22.07 1.2
 -4 3 5 21.8 1.27
 4 3 5 22.43 1.06
 -4 -3 5 21.01 1.15
 4 -3 -5 22.4 1.15
 4 -3 -5 20.74 1.23
 -4 3 -5 21.62 1.15
 -4 3 -5 23.42 1.24
 -4 -3 5 21.45 1.25
 -5 3 5 8.14 0.85
 5 -3 5 6.51 0.73
 -5 3 5 7.68 0.96
 -5 -3 -5 6.97 0.75
 5 3 -5 6.46 0.9
 5 3 -5 5.49 0.71
 -5 -3 5 6.12 0.74
 5 -3 -5 7.31 0.94
 5 -3 -5 7.52 0.84
 -5 3 -5 7.11 0.83
 -6 3 5 1.98 0.49
 6 3 -5 2.07 0.51
 6 3 -5 1.88 0.64
 -6 -3 -5 2.46 0.56
 -6 3 -5 3.03 0.67
 6 -3 -5 2.14 0.63
 -6 -3 5 2.23 0.52
 6 -3 -5 2.67 0.6
 -7 -3 -5 -0.26 0.34
 7 3 -5 0.79 0.53
 7 -3 -5 0.66 0.44
 -7 -3 5 0.04 0.34
 -7 3 -5 -0.2 0.31
 0 4 -5 35.14 1.22
 0 -4 5 35.69 1.29
 0 -4 -5 35.61 1
 0 4 -5 34.68 1.29
 0 4 5 34.04 0.97
 0 -4 -5 34.98 0.98
 1 -4 5 5.47 0.49
 -1 -4 -5 5.81 0.28
 1 -4 5 6.03 0.44
 -1 4 5 6.09 0.39
 -1 -4 -5 5.95 0.29
 1 4 -5 5.63 0.45
 -1 4 5 6.06 0.33
 1 4 -5 5.26 0.5
 1 -4 -5 5.61 0.34
 -1 4 -5 5.97 0.45
 -1 -4 5 6.32 0.45
 1 -4 -5 5.99 0.39
 -1 4 -5 6.66 0.52
 -1 -4 5 6.1 0.5
 1 4 5 5.64 0.25
 2 4 -5 21.05 0.95
 -2 -4 -5 20.68 0.85
 -2 -4 -5 21.17 0.8
 2 -4 5 20.19 0.92
 -2 4 5 20.76 0.95
 -2 4 5 19.93 0.85
 2 4 -5 19.74 1.02
 -2 4 -5 20.73 1.01
 2 -4 -5 20.16 0.95
 2 -4 -5 20.29 0.87
 -2 -4 5 19.55 0.92
 2 4 5 21.32 0.77
 -2 -4 5 21.54 1.04
 -2 4 -5 21.95 0.96
 -3 -4 -5 30.25 1.28
 3 4 -5 29.87 1.3
 -3 4 5 30.98 1.37
 3 -4 5 30.09 1.26
 3 4 -5 25.69 1.35
 -3 -4 -5 28.59 1.16
 -3 -4 5 30.86 1.31
 3 4 5 30.12 1.13
 -3 -4 5 29.53 1.39
 3 -4 -5 29.92 1.24
 3 -4 -5 30.03 1.36
 -3 4 -5 29.23 1.27
 -4 4 5 1.02 0.32
 4 -4 5 1.2 0.35
 4 4 -5 1.27 0.42
 -4 4 5 1.69 0.45
 -4 -4 -5 0.89 0.3
 -4 -4 -5 1.62 0.4
 4 4 -5 1.54 0.38
 4 4 5 1.32 0.32
 -4 -4 5 1.15 0.34
 -4 4 -5 1.5 0.39
 -4 -4 5 1.07 0.39
 -4 4 -5 1.37 0.38
 4 -4 -5 2.4 0.53
 4 -4 -5 1.57 0.37
 5 4 -5 0.6 0.42
 -5 4 5 0.07 0.34
 -5 4 5 0.22 0.3
 5 4 -5 0.31 0.32
 5 -4 5 0.17 0.26
 -5 -4 -5 0.38 0.29
 5 -4 -5 0.17 0.34
 5 4 5 0.21 0.29
 5 -4 -5 0.62 0.34
 -5 4 -5 0.55 0.32
 -5 -4 5 0.61 0.33
 -6 4 5 2.95 0.59
 6 4 -5 2.61 0.68
 -6 -4 -5 3.01 0.6
 6 -4 5 2.76 0.67
 -6 -4 5 1.42 0.5
 -6 4 -5 3.44 0.66
 6 -4 -5 2.7 0.65
 7 4 -5 2.47 0.72
 -7 -4 -5 4.07 0.78
 7 -4 -5 2.93 0.69
 -7 4 -5 2.86 0.67
 -7 -4 5 3.52 0.74
 0 -5 -5 28.33 0.77
 0 5 -5 26.06 1.03
 0 -5 -5 26.92 0.75
 0 5 -5 27.1 1.1
 0 -5 5 25.49 1.08
 0 5 -5 27.62 1.11
 -1 -5 -5 76.82 2.05
 -1 5 5 74.47 2.21
 -1 5 5 78.83 2.15
 -1 -5 -5 80.26 2.1
 1 5 -5 72.31 2.44
 1 -5 5 78.96 2.37
 1 5 -5 80.38 2.39
 1 -5 5 78.52 2.47
 1 -5 -5 77.14 2.17
 -1 5 -5 76.42 2.36
 1 -5 -5 77.42 2.23
 -1 -5 5 75.64 2.36
 1 5 5 74.83 2
 -1 5 -5 76.38 2.46
 -1 -5 5 80.46 2.47
 2 5 -5 1.66 0.36
 2 5 -5 1.84 0.34
 -2 5 5 2.05 0.35
 -2 -5 -5 1.85 0.24
 2 -5 5 2.07 0.35
 -2 -5 -5 2.14 0.3
 -2 5 5 1.66 0.26
 -2 -5 5 1.77 0.36
 2 5 5 2.07 0.24
 -2 5 -5 2.19 0.4
 2 -5 -5 1.67 0.28
 2 -5 -5 1.97 0.34
 -2 -5 5 1.44 0.31
 -2 5 -5 1.65 0.32
 3 5 -5 4.79 0.57
 3 -5 5 3.94 0.5
 -3 -5 -5 3.2 0.39
 3 5 -5 3.41 0.58
 -3 5 5 3.17 0.4
 -3 5 5 2.75 0.48
 -3 -5 -5 3.82 0.5
 -3 5 -5 2.76 0.42
 3 5 5 3.74 0.4
 3 -5 -5 4.47 0.58
 3 5 5 4.4 0.38
 -3 -5 5 2.37 0.4
 3 -5 -5 3.24 0.44
 -3 -5 5 3.28 0.51
 4 -5 5 17.29 1.02
 -4 5 5 16.71 0.99
 4 5 -5 17.39 1.17
 -4 5 5 18.4 1.14
 4 5 -5 19.15 1.09
 -4 -5 -5 17.52 0.96
 -4 -5 -5 22.41 1.16
 4 5 5 17.35 0.93
 -4 -5 5 17.06 1.03
 -4 5 -5 18.04 1.07
 4 -5 -5 18.23 1.03
 -4 5 -5 20.57 1.14
 4 -5 -5 17.23 1.09
 -5 5 5 11.16 0.87
 5 -5 5 9.76 0.84
 5 5 -5 9.93 1.14
 5 5 -5 12.14 0.95
 -5 5 5 12.07 1.05
 -5 -5 -5 9.88 0.81
 5 5 5 9.77 0.78
 5 -5 -5 11.01 0.88
 -5 5 -5 8.74 0.82
 -5 -5 5 9.63 0.87
 5 -5 -5 9.87 0.94
 6 5 -5 0.91 0.44
 -6 -5 -5 1.26 0.44
 6 -5 5 1.16 0.4
 -6 5 5 0.63 0.37
 6 -5 -5 0.6 0.39
 6 5 5 1.25 0.41
 -6 -5 5 0.81 0.4
 -6 5 -5 1.03 0.47
 -7 -5 -5 4.34 0.8
 7 5 -5 4.94 0.98
 -7 -5 5 5.71 0.95
 -7 5 -5 4.89 0.84
 7 -5 -5 5.21 0.91
 0 6 -5 2.4 0.34
 0 -6 5 2.8 0.37
 0 6 -5 3.22 0.38
 0 6 -5 2.47 0.38
 1 -6 5 13.76 0.75
 1 -6 5 14.5 0.83
 -1 6 5 15.42 0.57
 1 6 -5 15.64 0.77
 -1 -6 -5 15.22 0.5
 -1 -6 -5 14.45 0.48
 1 6 -5 13.97 0.82
 1 -6 -5 15.3 0.59
 -1 6 -5 13.43 0.8
 -1 -6 5 15.95 0.84
 1 -6 -5 15.86 0.62
 -1 -6 5 14.32 0.75
 -1 6 -5 15.1 0.77
 2 -6 5 80.93 2.54
 2 6 -5 82.89 2.71
 -2 -6 -5 76.82 2.29
 -2 -6 -5 82.36 2.38
 -2 6 5 77.03 2.38
 -2 6 5 80.5 2.52
 2 6 -5 83.21 2.58
 2 -6 -5 82.06 2.42
 -2 -6 5 76.71 2.53
 2 6 5 79.77 2.24
 -2 6 -5 77.61 2.54
 -2 -6 5 83.53 2.69
 2 -6 -5 80.69 2.49
 -2 6 -5 82.2 2.7
 -3 6 5 46.76 1.68
 3 -6 5 47.57 1.75
 -3 -6 -5 45.08 1.58
 -3 -6 -5 48.76 1.72
 3 6 -5 44.54 1.9
 3 6 -5 44.85 1.75
 -3 6 5 49.08 1.85
 3 6 5 47.08 1.54
 3 6 5 45.24 1.56
 -3 -6 5 46.23 1.88
 -3 6 -5 45.02 1.86
 -3 -6 5 41.43 1.72
 3 -6 -5 45.74 1.68
 3 -6 -5 46.7 1.78
 -3 6 -5 43.5 1.75
 -4 -6 -5 4.98 0.58
 -4 -6 -5 4.55 0.62
 4 6 -5 4.48 0.63
 4 6 -5 4.26 0.67
 -4 6 5 4.41 0.67
 4 -6 5 5.03 0.62
 -4 6 -5 4.95 0.64
 4 6 5 4.93 0.58
 4 -6 -5 4.79 0.6
 4 -6 -5 4.66 0.63
 -4 -6 5 4.66 0.61
 -4 6 -5 4.68 0.61
 -5 6 5 20.11 1.35
 5 6 -5 19.78 1.39
 -5 -6 -5 19.71 1.14
 -5 6 5 20.65 1.2
 5 -6 5 21.91 1.24
 5 -6 -5 17.26 1.19
 5 -6 -5 20.8 1.2
 -5 -6 5 19.42 1.22
 -5 6 -5 22.1 1.28
 5 6 5 19.56 1.12
 6 6 -5 8.02 1.11
 6 -6 5 8.52 0.92
 -6 -6 -5 7.67 0.88
 6 6 5 9.04 0.83
 6 -6 -5 7.81 1.04
 -6 -6 5 9.33 1.07
 -6 6 -5 8.46 1.04
 7 6 -5 0.47 0.5
 -7 -6 -5 0.12 0.35
 7 6 5 -0.4 0.35
 -7 -6 5 2.04 0.57
 7 -6 -5 0.82 0.47
 0 -7 5 60.7 2.03
 0 7 -5 61.51 1.96
 0 7 -5 58.63 1.96
 0 7 -5 55.88 2
 1 -7 5 83.27 2.65
 1 7 -5 76.45 2.6
 1 7 -5 83.29 2.52
 -1 -7 -5 80.22 2.11
 1 -7 5 86.15 2.57
 -1 -7 -5 75.99 2.1
 -1 7 5 80.44 2.22
 1 -7 -5 78.67 2.24
 -1 -7 5 85.52 2.63
 -1 7 -5 77.78 2.6
 -1 -7 5 77.38 2.48
 -1 7 -5 79.27 2.51
 2 7 -5 20.29 0.97
 -2 -7 -5 19.37 0.79
 -2 7 5 18.36 0.81
 2 -7 5 19.34 0.95
 2 7 -5 19.05 1.06
 -2 7 5 19 0.9
 -2 -7 -5 18.04 0.71
 2 7 5 18.45 0.7
 -2 7 -5 18.66 1.04
 -2 7 -5 19.45 0.96
 -2 -7 5 17.73 0.93
 2 -7 -5 18.43 0.85
 2 7 5 18.99 0.68
 -2 -7 5 17.55 0.99
 2 -7 -5 19.66 0.83
 -3 7 5 9.85 0.76
 3 7 -5 8.89 0.78
 -3 -7 -5 10.07 0.6
 -3 -7 -5 9.94 0.67
 3 -7 5 9.92 0.72
 3 7 -5 9.91 0.74
 -3 7 5 10.53 0.67
 3 7 5 9.97 0.61
 -3 7 -5 10.5 0.75
 3 -7 -5 10.63 0.68
 3 7 5 9.73 0.56
 -3 -7 5 10.62 0.84
 -3 7 -5 9.11 0.8
 3 -7 -5 10.22 0.72
 -3 -7 5 10.45 0.74
 4 7 -5 14.94 0.98
 4 -7 5 13.98 0.93
 -4 7 5 13.22 0.86
 -4 7 5 13.53 0.98
 4 7 -5 13.19 1.04
 -4 -7 -5 14.37 0.84
 4 -7 -5 15.62 0.93
 4 -7 -5 13.98 0.95
 4 7 5 13.03 0.83
 -4 -7 5 13.96 0.95
 -4 7 -5 14.37 0.98
 -4 7 -5 14.06 0.96
 -5 -7 -5 2.59 0.47
 5 -7 5 2.39 0.54
 -5 7 5 3.35 0.68
 5 7 -5 3.63 0.76
 -5 7 5 1.48 0.4
 -5 -7 5 2.71 0.54
 5 -7 -5 3.01 0.61
 -5 7 -5 3.43 0.62
 5 7 5 3.6 0.58
 5 -7 -5 2.4 0.5
 -6 -7 -5 14.97 1.07
 6 7 -5 14.95 1.33
 -6 -7 5 16.44 1.19
 6 7 5 13.1 1.03
 -6 7 -5 14.32 1.15
 6 -7 -5 14.38 1.14
 -7 -7 -5 5.47 0.84
 7 7 -5 4.93 1.03
 7 7 5 4.82 0.76
 7 -7 -5 5.42 0.86
 -7 -7 5 4.68 0.82
 0 -8 5 7.54 0.58
 0 8 -5 6.73 0.59
 0 8 -5 6.3 0.51
 0 8 -5 7.7 0.55
 0 -8 -5 7.02 0.27
 1 8 -5 61.85 2.01
 1 8 -5 56.67 2.07
 -1 8 5 60.52 1.68
 -1 -8 -5 56.55 1.56
 1 -8 5 57.82 2.04
 -1 -8 -5 58.39 1.56
 1 -8 5 57.17 2.08
 -1 8 5 56.71 1.75
 1 -8 -5 58.9 1.7
 -1 -8 5 60.4 2.08
 -1 -8 5 56.43 1.96
 -1 8 -5 56.38 1.97
 -1 8 -5 59.85 2.1
 -2 8 5 9.69 0.56
 2 -8 5 10.99 0.72
 2 8 -5 11.21 0.73
 -2 8 5 11.63 0.68
 -2 -8 -5 11.21 0.56
 2 8 -5 10.37 0.8
 -2 -8 -5 10.46 0.5
 -2 8 -5 10.03 0.78
 -2 8 -5 10.75 0.72
 -2 -8 5 10.52 0.72
 2 8 5 9.79 0.49
 -2 -8 5 10.49 0.76
 2 -8 -5 10.54 0.59
 2 8 5 10.46 0.45
 -3 -8 -5 35.71 1.35
 -3 8 5 36.8 1.46
 -3 -8 -5 41.84 1.51
 3 8 -5 36.88 1.58
 3 -8 5 39.05 1.59
 -3 8 5 38.93 1.62
 3 8 -5 38.63 1.76
 -3 8 -5 36.86 1.71
 3 -8 -5 37.66 1.49
 -3 -8 5 40.84 1.92
 -3 -8 5 35.49 1.56
 3 8 5 37.42 1.39
 -3 8 -5 41.15 1.65
 3 -8 -5 36.92 1.47
 4 8 -5 13.92 1.09
 -4 -8 -5 14.02 0.85
 -4 8 5 17.12 1.11
 -4 8 5 15.75 0.94
 4 -8 5 15.63 0.98
 4 -8 -5 14.87 0.96
 -4 8 -5 16.36 1.03
 -4 8 -5 14.72 1.1
 4 8 5 14.89 0.88
 4 -8 -5 15.43 0.94
 -4 8 -5 16.06 1.05
 -4 -8 5 15.17 1.01
 5 8 -5 4.27 0.75
 -5 8 5 5.74 0.87
 5 -8 5 5.51 0.78
 -5 -8 -5 4.79 0.62
 5 8 5 4.98 0.67
 5 -8 -5 6.19 0.78
 -5 8 -5 7.58 0.91
 5 -8 -5 5.35 0.69
 -5 -8 5 6.04 0.8
 6 8 -5 0.44 0.43
 -6 -8 -5 0.84 0.39
 -6 8 -5 0.69 0.4
 -6 -8 5 0.9 0.46
 6 -8 -5 0.16 0.32
 6 8 5 0.13 0.33
 -7 -8 -5 2.9 0.64
 7 8 -5 2.21 0.77
 7 -8 -5 2 0.6
 -7 -8 5 2.87 0.72
 7 8 5 2.35 0.6
 0 9 -5 11.81 0.71
 0 -9 5 11.5 0.75
 0 9 -5 10.97 0.76
 0 9 -5 14.05 0.77
 1 -9 5 23.8 1.17
 -1 9 5 23.48 0.84
 1 9 -5 22.51 1.14
 -1 9 5 22.86 0.78
 -1 -9 -5 21.01 0.68
 -1 9 5 21.64 0.85
 1 -9 5 24.51 1.16
 1 9 -5 24.16 1.08
 -1 -9 -5 22.24 0.68
 -1 9 -5 23.73 1.08
 -1 9 -5 20.63 1.09
 1 -9 -5 22.23 0.81
 -1 -9 5 20.74 1.01
 -1 9 -5 24.87 1.09
 -1 -9 5 24.41 1.16
 2 -9 5 13.37 0.81
 -2 9 5 12.59 0.64
 -2 -9 -5 11.44 0.53
 2 9 -5 12.77 0.8
 -2 -9 -5 12.64 0.59
 2 9 -5 10.97 0.84
 -2 9 5 11.47 0.7
 2 9 5 11.93 0.54
 -2 9 -5 12.13 0.87
 -2 -9 5 12.91 0.87
 2 9 5 12.25 0.49
 -2 9 -5 12.6 0.8
 2 -9 -5 11.97 0.64
 -2 -9 5 11.24 0.76
 3 9 -5 0.5 0.35
 -3 -9 -5 0.9 0.28
 -3 9 5 0.69 0.25
 3 9 -5 0.51 0.28
 3 -9 5 0.72 0.3
 -3 9 5 0.72 0.32
 -3 -9 -5 0.73 0.22
 3 9 5 0.82 0.26
 3 -9 -5 0.95 0.27
 -3 9 -5 0.45 0.26
 -3 9 -5 1.34 0.42
 -3 -9 5 0.78 0.32
 -4 9 5 4.25 0.66
 -4 -9 -5 4.03 0.5
 -4 9 5 4.43 0.56
 4 -9 5 6.03 0.74
 4 9 -5 4.9 0.78
 4 9 5 5.28 0.62
 -4 9 -5 4.97 0.76
 4 -9 -5 5.36 0.63
 -4 -9 5 4.17 0.63
 -4 9 -5 4.12 0.64
 -4 9 -5 5.08 0.68
 -5 -9 -5 15.95 1.03
 -5 9 5 18.82 1.3
 5 9 -5 18.87 1.36
 5 -9 5 18.94 1.2
 -5 9 -5 19.02 1.23
 -5 -9 5 18.17 1.21
 5 9 5 18.15 1.09
 6 9 -5 1.72 0.61
 -6 -9 -5 1.96 0.48
 6 9 5 1.7 0.49
 -6 -9 5 0.92 0.43
 0 -10 5 2.67 0.45
 0 10 -5 4 0.49
 0 10 -5 3.77 0.55
 0 10 -5 3.22 0.44
 -1 10 5 14.33 0.57
 1 10 -5 13.38 0.89
 -1 -10 -5 14.27 0.5
 1 -10 5 14.47 0.91
 1 10 -5 14.63 0.84
 -1 10 5 14.33 0.62
 -1 10 5 13.69 0.64
 -1 10 -5 16.33 0.87
 1 -10 -5 14.03 0.61
 -1 10 -5 14.14 0.83
 -1 -10 5 15.83 0.93
 -1 10 -5 13.61 0.88
 -1 -10 5 13.36 0.8
 2 -10 5 2 0.39
 2 10 -5 2.49 0.45
 -2 -10 -5 2.67 0.3
 -2 -10 -5 1.72 0.23
 -2 10 5 2.06 0.37
 -2 10 5 2.69 0.34
 2 10 -5 2.15 0.47
 -2 10 -5 1.96 0.4
 -2 10 -5 2.03 0.46
 -2 -10 5 2.72 0.46
 2 -10 -5 2.15 0.33
 2 10 5 1.83 0.25
 3 10 -5 7.22 0.86
 -3 10 5 6.19 0.7
 -3 -10 -5 7 0.5
 -3 -10 -5 5.86 0.52
 3 -10 5 7.22 0.66
 -3 10 5 6.27 0.53
 3 -10 -5 6.6 0.56
 -3 10 -5 5.04 0.73
 3 10 5 5.77 0.48
 -3 10 -5 5.01 0.63
 -3 -10 5 6.65 0.74
 -4 10 5 9.13 0.83
 4 -10 5 8.47 0.77
 -4 10 5 7.72 0.68
 -4 -10 -5 7.78 0.63
 4 10 -5 6.36 0.89
 -4 10 -5 8.27 0.88
 4 -10 -5 9.11 0.73
 -4 -10 5 8.97 0.93
 4 10 5 8.1 0.66
 -4 10 -5 9.45 0.89
 -5 10 5 4.32 0.75
 5 10 -5 2.85 0.66
 -5 -10 -5 2.95 0.51
 -5 -10 5 3.48 0.63
 -5 10 -5 3.67 0.76
 -5 10 -5 3.65 0.66
 5 10 5 3.49 0.57
 6 10 -5 5.72 1.02
 -6 -10 -5 8.09 0.89
 -6 -10 5 6.71 0.93
 6 10 5 7.66 0.9
 0 11 -5 0.68 0.26
 0 -11 5 0.82 0.29
 0 11 -5 1.34 0.37
 1 11 -5 3.03 0.53
 -1 -11 -5 2.75 0.21
 -1 11 5 2.67 0.24
 -1 11 5 2.56 0.3
 -1 11 5 2.51 0.31
 1 11 -5 3.56 0.49
 -1 -11 5 2.56 0.42
 -1 11 -5 2.97 0.54
 1 -11 -5 3.12 0.32
 -1 11 -5 2.13 0.41
 -1 11 -5 3.46 0.51
 -2 11 5 29.54 1.25
 -2 11 5 29.71 1.14
 -2 -11 -5 29.41 1.03
 2 11 -5 29.31 1.47
 -2 -11 -5 31.58 1.07
 2 -11 5 30.28 1.38
 2 11 5 30.9 1.04
 2 -11 -5 31.15 1.18
 -2 -11 5 30.63 1.37
 -2 11 -5 30.66 1.39
 -2 11 -5 30.15 1.48
 -3 -11 -5 2.52 0.38
 3 -11 5 1.91 0.43
 3 11 -5 1.73 0.46
 -3 11 5 2.15 0.43
 -3 -11 -5 2.5 0.34
 -3 11 5 1.78 0.33
 -3 11 -5 2.11 0.51
 -3 11 -5 1.24 0.35
 3 11 5 2.11 0.35
 -3 -11 5 1.67 0.43
 3 -11 -5 2.61 0.42
 4 -11 5 21.18 1.23
 -4 -11 -5 19.37 1.01
 -4 11 5 19.63 1.11
 4 11 -5 19.44 1.36
 -4 11 5 23.09 1.31
 4 11 5 20.35 1.05
 -4 -11 5 20.08 1.21
 -4 11 -5 20.82 1.25
 -4 11 -5 21.51 1.39
 4 -11 -5 19.77 1.11
 5 11 -5 7.94 1.08
 -5 -11 -5 8.15 0.73
 -5 -11 5 8.81 0.99
 -5 11 -5 9.86 1.16
 5 11 5 9.91 0.81
 -6 -11 -5 1.34 0.43
 6 11 -5 1.08 0.53
 -6 -11 5 1.72 0.52
 6 11 5 1.77 0.47
 -6 11 -5 1.33 0.56
 0 12 5 5.84 0.29
 0 12 5 6.35 0.31
 0 12 -5 5.31 0.69
 1 12 -5 16.8 1.06
 1 12 -5 15.95 0.95
 -1 12 5 16.39 0.71
 -1 12 5 17.1 0.66
 -1 12 5 15.48 0.72
 -1 -12 -5 17.49 0.63
 1 -12 -5 16.75 0.72
 -1 12 -5 16.59 1.04
 -1 -12 5 16.91 0.94
 -2 12 5 2.08 0.37
 2 12 -5 1.79 0.46
 -2 12 5 2.42 0.33
 2 -12 5 2.14 0.43
 -2 12 5 1.74 0.34
 -2 -12 -5 1.84 0.26
 -2 -12 -5 2.23 0.27
 -2 -12 5 1.92 0.41
 -2 12 -5 2.01 0.48
 2 -12 -5 2.29 0.34
 2 12 5 2.2 0.28
 -2 12 -5 2.64 0.47
 2 12 5 2.36 0.2
 -3 -12 -5 3.79 0.42
 3 -12 5 4.96 0.67
 -3 12 5 4.52 0.6
 3 12 -5 4.13 0.69
 -3 -12 -5 4.54 0.5
 -3 12 5 4.54 0.52
 3 -12 -5 3.59 0.5
 -3 12 -5 4.38 0.61
 -3 12 -5 3.81 0.67
 3 12 5 4.89 0.45
 -3 -12 5 3.15 0.54
 -4 -12 -5 8.82 0.66
 4 12 -5 6.52 0.9
 -4 12 5 9.98 0.87
 -4 -12 5 9.71 0.85
 4 -12 -5 9.33 0.77
 -4 12 -5 10.75 0.9
 4 12 5 9.5 0.72
 -4 12 -5 9.56 1.09
 5 12 -5 16.98 1.36
 -5 -12 -5 20.02 1.11
 -5 12 -5 17.02 1.37
 5 12 5 18.94 1.13
 -5 -12 5 18.51 1.25
 6 12 -5 0.19 0.46
 -6 -12 -5 0.54 0.34
 6 12 5 0.91 0.39
 -6 -12 5 0.48 0.42
 -6 12 -5 0.23 0.39
 0 13 5 2.07 0.21
 0 13 -5 2.09 0.49
 0 13 -5 2.05 0.41
 0 13 5 1.72 0.2
 1 13 -5 21.94 1.26
 1 13 -5 20.52 1.1
 -1 -13 -5 21.9 0.77
 -1 13 5 21.04 0.86
 -1 13 5 22.15 0.81
 -1 13 5 20.98 0.88
 1 -13 -5 21.8 0.88
 -1 13 -5 22.86 1.26
 -2 -13 -5 11.22 0.56
 -2 13 5 11.89 0.73
 2 13 -5 12.13 0.96
 -2 -13 -5 11.56 0.59
 2 -13 5 11.82 0.86
 -2 13 5 11.68 0.73
 -2 13 5 11.47 0.64
 -2 13 -5 12.37 0.94
 2 -13 -5 12.49 0.69
 -2 -13 5 10.63 0.82
 2 13 5 11.48 0.56
 -2 13 -5 12.84 0.88
 -3 13 5 9.98 0.67
 3 -13 5 9.63 0.82
 -3 13 5 9.96 0.77
 3 13 -5 10.08 1.14
 -3 -13 -5 10.02 0.61
 -3 -13 5 8.14 0.77
 -3 13 -5 9.62 1.06
 3 -13 -5 10.24 0.71
 3 13 5 8.52 0.59
 -3 13 -5 9.72 0.83
 -4 -13 -5 9.23 0.68
 4 13 -5 9.35 1.1
 -4 -13 5 9.67 0.86
 4 13 5 9.19 0.71
 -4 13 -5 10.68 1.19
 5 13 -5 4.96 0.89
 -5 -13 -5 4.74 0.62
 -5 13 -5 7.44 1.06
 -5 -13 5 4.53 0.73
 5 13 5 4.84 0.66
 0 14 5 4.52 0.29
 0 14 5 4.38 0.3
 0 14 -5 4.99 0.7
 0 14 -5 4.52 0.57
 -1 14 5 15.12 0.63
 -1 14 5 13.79 0.69
 1 14 -5 14.61 1.04
 1 14 -5 16.1 0.94
 -1 14 5 14.63 0.69
 1 -14 -5 14.14 0.7
 -1 14 -5 14 0.91
 -1 14 -5 12.18 0.96
 1 14 5 14.14 0.53
 -2 14 5 5.86 0.53
 2 -14 5 6.05 0.74
 -2 -14 -5 6.61 0.43
 2 14 -5 4.87 0.74
 -2 -14 -5 5.5 0.39
 -2 14 5 5.12 0.44
 -2 14 5 5.9 0.53
 2 14 5 5.64 0.39
 -2 -14 5 4.88 0.62
 -2 14 -5 5.36 0.75
 2 -14 -5 6.02 0.5
 -3 14 5 5.23 0.66
 -3 -14 -5 5.28 0.46
 -3 14 5 4.66 0.54
 3 14 -5 5.13 0.82
 -3 14 -5 5 0.77
 3 -14 -5 4.46 0.55
 -3 -14 5 5.96 0.75
 3 14 5 4.85 0.46
 -4 -14 -5 27.44 1.23
 4 14 -5 27.92 1.69
 -4 -14 5 26.56 1.47
 4 14 5 26.14 1.24
 -4 14 -5 25.32 1.62
 5 14 -5 0.09 0.42
 -5 -14 -5 0.46 0.31
 5 14 5 0.79 0.35
 -5 14 -5 1.39 0.53
 -5 -14 5 1.1 0.43
 0 15 -5 7.15 0.66
 0 15 5 6.24 0.38
 0 15 5 6.77 0.37
 0 15 -5 6.36 0.79
 -1 15 5 3.36 0.38
 1 15 -5 3.07 0.61
 -1 15 5 3.44 0.38
 -1 15 5 3.02 0.33
 1 15 -5 4.73 0.61
 -1 15 -5 3.03 0.5
 1 -15 -5 2.92 0.4
 -1 15 -5 3.39 0.63
 1 15 5 3.63 0.26
 2 15 -5 2.77 0.59
 -2 15 5 3.06 0.38
 -2 15 5 3.28 0.46
 -2 -15 -5 2.93 0.34
 -2 -15 -5 2.71 0.31
 2 15 5 2.96 0.33
 -2 15 -5 2.74 0.57
 2 -15 -5 2.42 0.38
 -2 -15 5 2.72 0.51
 3 15 -5 -0.1 0.35
 -3 15 5 0.67 0.33
 -3 -15 -5 0.19 0.18
 3 -15 -5 -0.07 0.19
 -3 15 -5 0.29 0.38
 3 15 5 0.45 0.2
 -3 -15 5 0.06 0.24
 -4 -15 -5 4.13 0.53
 -4 15 5 3.97 0.65
 4 15 -5 3.18 0.71
 -4 15 -5 4.42 0.83
 -4 -15 5 4.14 0.68
 4 15 5 5.06 0.6
 5 15 -5 3.91 0.83
 -5 -15 -5 3.53 0.55
 -5 15 -5 3.05 0.72
 5 15 5 4.2 0.62
 -5 -15 5 4.23 0.74
 0 16 5 1.87 0.22
 0 16 -5 2 0.49
 0 16 5 1.3 0.22
 -1 16 5 10.03 0.59
 1 16 -5 11.97 0.98
 1 16 5 10.23 0.46
 -1 16 -5 10.33 0.94
 -2 16 5 3.06 0.45
 -2 16 5 2.52 0.37
 2 16 -5 2.24 0.58
 -2 -16 5 1.92 0.46
 2 16 5 2.21 0.29
 2 -16 -5 2.83 0.44
 -2 16 -5 2.18 0.56
 -3 -16 -5 3.89 0.45
 3 16 -5 3.58 0.72
 -3 16 5 3.73 0.58
 -3 -16 5 3.34 0.6
 3 16 5 3.35 0.43
 -3 16 -5 2.78 0.66
 4 16 -5 -0.6 0.27
 -4 -16 -5 -0.15 0.21
 -4 16 5 0.3 0.31
 -4 16 -5 0.08 0.31
 -4 -16 5 -0.13 0.28
 4 16 5 -0.08 0.21
 0 17 -5 4.6 0.75
 0 17 5 5.11 0.37
 1 17 -5 0.74 0.39
 -1 17 5 0.4 0.22
 1 17 5 0.5 0.15
 -1 17 -5 0.83 0.41
 -2 17 5 0.6 0.27
 2 17 -5 0.59 0.4
 -2 -17 5 0.33 0.3
 2 17 5 0.53 0.18
 -2 17 -5 0.41 0.39
 2 -17 -5 0.9 0.28
 -3 -17 -5 0.39 0.21
 3 17 -5 0.51 0.43
 -3 17 5 0.23 0.28
 -3 17 -5 0.51 0.35
 3 17 5 0.32 0.19
 -3 -17 5 -0.33 0.21
 -4 -17 -5 0.25 0.24
 4 17 -5 -0.32 0.31
 -4 17 5 -0.15 0.28
 -4 -17 5 -0.21 0.26
 4 17 5 0.48 0.24
 -4 17 -5 0.49 0.4
 0 18 5 -0.15 0.12
 0 18 -5 -0.14 0.25
 -1 18 5 3.8 0.44
 1 18 -5 5.15 0.83
 -1 18 -5 4.55 0.77
 -2 18 5 2.16 0.41
 2 18 -5 2.43 0.63
 2 18 5 2.27 0.32
 -2 18 -5 2.18 0.6
 -3 -18 -5 0.75 0.25
 3 18 -5 0.65 0.45
 -3 18 5 1.25 0.38
 -3 -18 5 0.43 0.35
 3 18 5 1.34 0.28
 -3 18 -5 0.19 0.38
 0 19 -5 0.88 0.44
 -1 19 5 1.89 0.33
 1 19 -5 1.31 0.53
 -1 19 -5 1.47 0.52
 -2 19 5 0.65 0.28
 2 19 -5 -0.12 0.34
 -2 19 -5 0.35 0.39
 0 0 -6 971.76 25.67
 0 0 6 949.87 25.52
 0 0 -6 1000 25.72
 0 0 6 979.34 25.49
 1 0 6 12.2 0.61
 1 0 -6 12.06 0.6
 1 0 -6 11.67 0.65
 1 0 6 12.12 0.56
 -1 0 -6 12.48 0.57
 -1 0 -6 11.79 0.61
 -1 0 6 11.86 0.64
 2 0 6 73.28 2.24
 2 0 -6 72 2.44
 -2 0 6 78.9 2.46
 -2 0 -6 76.62 2.29
 2 0 -6 75.66 2.34
 -2 0 6 72.93 2.31
 -3 0 6 0.37 0.25
 -3 0 -6 0.53 0.24
 -3 0 6 0.3 0.23
 3 0 -6 0.2 0.23
 3 0 6 0.38 0.21
 3 0 -6 0.25 0.21
 -3 0 -6 0.23 0.2
 -4 0 6 16.12 1.07
 4 0 -6 14.63 1.05
 4 0 -6 16.19 0.98
 -4 0 6 14.67 0.93
 -4 0 -6 15.48 0.98
 4 0 6 14.23 0.86
 -4 0 -6 12.78 0.87
 -5 0 6 0.24 0.28
 5 0 -6 0.32 0.3
 5 0 -6 0.56 0.38
 -5 0 -6 0 0.26
 6 0 -6 25.47 1.68
 -6 0 6 25.75 1.49
 -6 0 -6 22.43 1.41
 6 0 -6 26.89 1.53
 7 0 -6 -0.09 0.39
 -7 0 -6 1.79 0.55
 0 -1 6 14.54 0.63
 0 -1 -6 15.17 0.64
 0 1 6 14.33 0.57
 0 -1 6 14.71 0.69
 0 -1 -6 14.49 0.58
 0 1 -6 14.09 0.68
 0 1 6 15.13 0.62
 0 1 -6 14.31 0.63
 1 -1 6 23.13 0.96
 -1 1 6 24.4 0.88
 1 1 -6 24.93 0.94
 -1 -1 -6 23.72 0.9
 -1 1 6 24.49 0.95
 -1 -1 -6 23.34 0.85
 1 -1 6 23.23 0.9
 1 1 -6 23.8 1
 -1 -1 6 25.36 0.99
 -1 -1 6 24.46 0.93
 1 -1 -6 24.01 0.9
 1 -1 -6 23.42 0.96
 -1 1 -6 25.01 0.98
 -1 1 -6 23.58 0.91
 1 1 6 22.26 0.83
 2 1 -6 59.91 2.11
 -2 -1 -6 58.34 1.9
 -2 1 6 63.89 2.08
 -2 1 6 60.68 1.95
 2 -1 6 64.36 1.95
 2 1 -6 63.02 2.01
 -2 -1 6 60.43 2.09
 2 1 6 60.8 1.87
 2 -1 -6 61.94 2.09
 -2 -1 6 57.88 1.97
 -2 1 -6 61.1 1.96
 -2 1 -6 60.38 2.04
 2 -1 -6 62.25 1.98
 3 1 -6 5.06 0.56
 -3 1 6 4.57 0.62
 3 1 -6 3.19 0.51
 -3 -1 -6 5.8 0.51
 -3 1 6 3.97 0.48
 -3 -1 -6 3.97 0.47
 3 -1 6 4.99 0.51
 -3 1 -6 3.49 0.45
 -3 1 -6 3.71 0.45
 -3 -1 6 3.76 0.54
 -3 -1 6 4.78 0.55
 3 1 6 4.65 0.49
 3 -1 -6 4.44 0.61
 3 -1 -6 4.85 0.56
 4 1 -6 51.83 2.26
 -4 -1 -6 55.85 2.07
 -4 1 6 56.48 2.28
 -4 1 6 54.96 2.09
 4 -1 6 57.17 2.05
 4 1 -6 57.55 2.15
 -4 -1 -6 60.58 2.23
 -4 -1 6 54.79 2.11
 4 -1 -6 56.31 2.12
 -4 -1 6 57.24 2.31
 4 -1 -6 59.02 2.34
 -4 1 -6 61.29 2.26
 4 1 6 56.08 2.02
 -4 1 -6 54.47 2.08
 -5 1 6 7.86 0.96
 -5 -1 -6 8.45 0.77
 5 -1 6 8.63 0.74
 5 1 -6 5.57 0.86
 -5 1 6 9.18 0.93
 5 1 -6 8.62 0.8
 5 -1 -6 8.65 1
 -5 -1 6 6.71 0.77
 -5 1 -6 8.44 0.89
 5 -1 -6 9.78 0.84
 6 1 -6 5.95 1
 -6 -1 -6 6.11 0.83
 6 1 -6 6.19 0.83
 -6 1 6 4.23 0.7
 6 -1 -6 4.5 0.85
 -6 -1 6 6.45 0.84
 6 -1 -6 7.31 0.88
 -6 1 -6 5.1 0.76
 -7 -1 -6 0.91 0.49
 7 1 -6 1.61 0.61
 -7 -1 6 0.39 0.37
 7 -1 -6 0.27 0.44
 -7 1 -6 0.83 0.48
 0 -2 6 4.37 0.36
 0 2 -6 3.87 0.36
 0 -2 -6 4.59 0.32
 0 2 6 4.27 0.3
 0 2 -6 4.08 0.43
 0 -2 6 4.23 0.38
 0 -2 -6 4.51 0.29
 -1 -2 -6 27.5 0.97
 -1 -2 -6 28.53 0.93
 1 2 -6 27.26 1.13
 1 2 -6 27.89 1.06
 -1 2 6 28.15 0.97
 1 -2 6 27.74 1.05
 -1 2 6 27.21 1.02
 1 -2 6 26.44 1.1
 -1 -2 6 27.91 1.06
 -1 2 -6 28.37 1.12
 1 -2 -6 28.31 1.06
 -1 2 -6 29.03 1.06
 -1 -2 6 29.59 1.13
 1 -2 -6 28.07 0.99
 1 2 6 28.19 0.92
 2 2 -6 45.06 1.73
 2 2 -6 47.96 1.64
 -2 2 6 45.54 1.65
 2 -2 6 46.33 1.57
 -2 -2 -6 44.43 1.49
 -2 -2 6 46.6 1.72
 -2 2 -6 47.75 1.69
 -2 2 -6 45.62 1.59
 2 2 6 45.61 1.46
 -2 -2 6 46.28 1.62
 2 -2 -6 46.97 1.58
 2 -2 -6 44.15 1.66
 3 -2 6 0.3 0.2
 -3 2 6 0.73 0.29
 -3 -2 -6 0.42 0.22
 3 2 -6 0.2 0.25
 3 2 -6 0.14 0.22
 -3 -2 -6 -0.01 0.18
 -3 2 6 0.42 0.21
 3 -2 -6 0.62 0.25
 3 -2 -6 0.56 0.28
 -3 -2 6 0.47 0.26
 -3 -2 6 0.19 0.27
 -3 2 -6 0.16 0.18
 3 2 6 0.68 0.22
 -4 2 6 -0.02 0.25
 4 2 -6 -0.19 0.19
 -4 -2 -6 -0.11 0.22
 -4 -2 -6 0.3 0.27
 -4 2 6 0.04 0.21
 4 2 -6 -0.05 0.25
 4 -2 6 0.42 0.26
 -4 -2 6 0.26 0.24
 -4 -2 6 0.78 0.35
 4 -2 -6 0.09 0.34
 -4 2 -6 0.5 0.32
 4 2 6 0.69 0.27
 -4 2 -6 -0.17 0.21
 4 -2 -6 -0.13 0.22
 5 2 -6 12.24 1.12
 -5 2 6 11.41 0.91
 -5 2 6 13.54 1.13
 5 -2 6 14.86 0.97
 -5 -2 -6 13.52 0.95
 5 2 -6 14.36 1.02
 5 -2 -6 14.52 1.16
 5 -2 -6 14.85 1.02
 -5 2 -6 12.35 0.96
 -5 -2 6 12.16 0.96
 -6 -2 -6 15.42 1.13
 6 2 -6 15.7 1.15
 -6 2 6 14.12 1.08
 6 2 -6 15.15 1.34
 -6 -2 6 13.1 1.08
 -6 2 -6 14.63 1.14
 6 -2 -6 12.87 1.22
 6 -2 -6 14.33 1.11
 -7 -2 -6 0.85 0.47
 7 2 -6 0.37 0.46
 -7 2 -6 0.66 0.44
 -7 -2 6 0.2 0.33
 7 -2 -6 0.32 0.42
 0 3 -6 55.11 1.85
 0 -3 -6 58.01 1.65
 0 -3 6 55.63 1.85
 0 -3 -6 57.76 1.6
 0 3 -6 58.04 1.8
 1 3 -6 24.43 0.98
 -1 -3 -6 23.49 0.83
 -1 3 6 23.3 0.83
 1 -3 6 24.06 1.04
 1 3 -6 24.25 1.05
 -1 -3 -6 22.19 0.78
 1 -3 6 22.56 0.95
 -1 3 6 24.24 0.9
 1 -3 -6 24.39 0.86
 1 3 6 24.65 0.79
 -1 3 -6 23.86 1.02
 -1 3 -6 22.41 0.95
 -1 -3 6 22.6 0.95
 -1 -3 6 25.12 1.04
 1 -3 -6 23.75 0.93
 2 3 -6 25.87 1.09
 -2 -3 -6 26.44 0.98
 -2 3 6 26.69 1.02
 2 3 -6 24.53 1.18
 2 -3 6 23.75 1.02
 -2 3 6 26.8 1.12
 -2 -3 -6 24.7 0.94
 -2 -3 6 26.35 1.18
 -2 -3 6 25.27 1.08
 -2 3 -6 25.37 1.07
 2 -3 -6 27.07 1.04
 2 -3 -6 23.73 1.09
 -2 3 -6 25.64 1.16
 2 3 6 23.97 0.9
 3 -3 6 18.06 0.92
 -3 3 6 17.69 0.89
 3 3 -6 16.86 1.06
 -3 3 6 16.55 0.99
 -3 -3 -6 16.48 0.84
 -3 -3 -6 18.72 0.94
 3 3 -6 18.59 0.98
 -3 -3 6 17.61 1.04
 -3 3 -6 17.43 0.93
 -3 -3 6 18.2 0.96
 3 3 6 16.72 0.8
 3 -3 -6 18.19 1.05
 3 -3 -6 18.63 0.93
 -4 3 6 0.78 0.29
 -4 3 6 0.31 0.3
 4 3 -6 0.78 0.36
 -4 -3 -6 1.04 0.35
 4 3 -6 1.2 0.39
 4 -3 6 1 0.33
 -4 -3 -6 0.92 0.3
 -4 3 -6 1.17 0.37
 -4 -3 6 1.11 0.38
 4 -3 -6 0.6 0.35
 -4 3 -6 0.91 0.36
 -4 -3 6 1.73 0.46
 4 -3 -6 0.96 0.32
 -5 3 6 21.61 1.23
 5 -3 6 21.57 1.2
 -5 -3 -6 19.74 1.17
 5 3 -6 20.76 1.42
 5 3 -6 19.75 1.22
 -5 3 6 19.9 1.35
 5 -3 -6 19.04 1.3
 -5 -3 6 20.53 1.23
 5 -3 -6 20.65 1.21
 -5 3 -6 20.64 1.22
 6 3 -6 6.98 1
 -6 -3 -6 7.92 0.91
 -6 3 6 7.28 0.88
 6 3 -6 8.44 0.99
 -6 -3 6 7.73 0.95
 6 -3 -6 9.22 1.17
 -6 3 -6 9.41 1.05
 -7 -3 -6 0.21 0.39
 7 3 -6 0.34 0.46
 7 -3 -6 0.51 0.39
 -7 -3 6 0.18 0.36
 -7 3 -6 -0.09 0.34
 0 -4 6 35.67 1.36
 0 4 -6 35.31 1.37
 0 4 6 36.51 1.07
 0 -4 -6 37.98 1.07
 0 4 -6 38.09 1.32
 0 -4 -6 37.55 1.11
 -1 4 6 26.88 0.88
 -1 4 6 25.49 0.94
 1 -4 6 26.01 1.05
 1 4 -6 26.18 1.13
 -1 -4 -6 25.01 0.81
 1 -4 6 24.02 1.1
 -1 -4 -6 26.11 0.85
 1 4 -6 25.39 1.05
 -1 -4 6 25.5 1.04
 -1 -4 6 25.94 1.12
 -1 4 -6 25.64 1.04
 1 -4 -6 26.17 0.97
 1 -4 -6 26.45 0.9
 -1 4 -6 24.33 1.09
 2 4 -6 30.93 1.39
 2 4 -6 34.18 1.33
 -2 -4 -6 32.25 1.12
 2 -4 6 33.5 1.29
 -2 4 6 33.7 1.31
 -2 -4 -6 35.44 1.2
 -2 4 6 32.35 1.2
 -2 -4 6 35.38 1.44
 2 -4 -6 33.45 1.33
 -2 4 -6 32.48 1.4
 -2 -4 6 33.46 1.32
 2 4 6 31.96 1.08
 2 -4 -6 33.12 1.23
 -2 4 -6 32.56 1.3
 3 4 -6 8.38 0.66
 -3 -4 -6 7.73 0.61
 3 -4 6 7.38 0.61
 3 4 -6 7.74 0.85
 -3 4 6 8.46 0.7
 -3 -4 -6 6.96 0.53
 3 -4 -6 8.7 0.63
 -3 4 -6 7.37 0.63
 3 -4 -6 7.73 0.69
 -3 -4 6 7.57 0.69
 3 4 6 7.67 0.51
 -3 -4 6 7.98 0.66
 -4 4 6 3.58 0.52
 -4 -4 -6 2.92 0.52
 4 4 -6 2.43 0.57
 4 4 -6 3.37 0.55
 -4 4 6 2.2 0.52
 4 -4 6 2.53 0.48
 -4 -4 -6 2.43 0.43
 -4 -4 6 2.87 0.57
 -4 -4 6 2.16 0.45
 -4 4 -6 1.87 0.41
 -4 4 -6 1.98 0.46
 4 -4 -6 1.96 0.47
 4 -4 -6 2.27 0.46
 5 4 -6 1.57 0.47
 5 4 -6 1.07 0.5
 -5 4 6 2.15 0.54
 -5 -4 -6 1.73 0.44
 -5 4 6 1.83 0.45
 5 -4 6 2.13 0.46
 5 -4 -6 2.47 0.49
 -5 4 -6 1.52 0.44
 5 -4 -6 1.98 0.52
 -5 -4 6 2.43 0.51
 -6 -4 -6 1.01 0.42
 6 4 -6 0.11 0.37
 -6 4 6 0.63 0.38
 6 -4 -6 0.29 0.4
 -6 4 -6 0.06 0.32
 -6 -4 6 0.51 0.36
 -7 -4 -6 -0.19 0.34
 7 4 -6 0.49 0.48
 7 -4 -6 0.41 0.51
 -7 -4 6 -0.2 0.31
 -7 4 -6 0.82 0.45
 0 -5 -6 71.16 1.9
 0 5 -6 68.25 2.3
 0 5 6 70.84 1.88
 0 -5 6 72.61 2.32
 0 -5 -6 73.63 1.93
 0 5 -6 74.07 2.25
 0 5 -6 68.94 2.3
 -1 -5 -6 14.63 0.52
 -1 -5 -6 14.33 0.5
 1 -5 6 14.44 0.82
 1 -5 6 15.74 0.8
 1 5 -6 14.44 0.76
 1 5 -6 15.2 0.85
 -1 5 6 14.53 0.63
 -1 -5 -6 14.75 0.53
 -1 5 6 15.08 0.58
 1 -5 -6 14.83 0.66
 -1 -5 6 14.71 0.75
 -1 5 -6 14.85 0.76
 -1 5 -6 14.85 0.83
 1 -5 -6 15.21 0.61
 -1 -5 6 15.73 0.83
 -2 5 6 19.27 0.83
 2 5 -6 18.42 0.94
 -2 -5 -6 19.54 0.76
 -2 5 6 21.08 0.95
 -2 -5 -6 20.02 0.83
 2 -5 6 18.95 0.93
 2 5 -6 18.26 1.02
 2 5 6 19.78 0.72
 -2 5 -6 18.93 1.02
 -2 -5 6 21.48 1.07
 2 -5 -6 20.83 0.96
 -2 -5 6 18.94 0.95
 2 -5 -6 20.06 0.87
 -2 5 -6 21.43 0.99
 -3 5 6 1.73 0.33
 3 5 -6 1.22 0.35
 -3 -5 -6 1.29 0.27
 3 -5 6 1.47 0.35
 -3 -5 -6 2.14 0.38
 -3 5 6 1.37 0.37
 3 5 -6 1.55 0.46
 3 -5 -6 1.48 0.33
 3 5 6 1.47 0.26
 -3 -5 6 2.15 0.41
 3 -5 -6 1.64 0.4
 -3 5 -6 1.09 0.32
 -3 -5 6 1.59 0.41
 -3 5 -6 1.74 0.42
 4 -5 6 19.28 1.09
 -4 5 6 19.78 1.2
 -4 -5 -6 18.47 0.99
 4 5 -6 19.96 1.26
 4 5 -6 18.17 1.1
 -4 5 6 20.09 1.06
 -4 5 -6 18.62 1.12
 -4 5 -6 20.18 1.12
 4 -5 -6 17.68 1.04
 -4 -5 6 17.39 1.08
 4 -5 -6 19.62 1.18
 5 5 -6 6.24 0.78
 -5 5 6 5.9 0.71
 5 -5 6 7.36 0.82
 5 5 -6 4.17 0.75
 -5 5 6 7.52 0.96
 -5 -5 -6 7.36 0.79
 -5 5 -6 5.7 0.72
 5 -5 -6 7.66 0.96
 -5 -5 6 6.33 0.76
 5 -5 -6 5.81 0.7
 6 5 -6 5.51 0.96
 -6 -5 -6 6.53 0.84
 -6 -5 6 6.49 0.86
 -6 5 -6 5.14 0.83
 6 -5 -6 6.17 0.92
 7 5 -6 14.21 1.64
 -7 -5 -6 15.01 1.2
 -7 5 -6 14.51 1.24
 -7 -5 6 17.31 1.31
 7 -5 -6 15.53 1.32
 0 6 -6 72.57 2.35
 0 -6 6 73.79 2.38
 0 -6 -6 72.63 1.89
 0 6 -6 69.77 2.37
 0 6 -6 73.14 2.3
 -1 -6 -6 59.08 1.65
 -1 -6 -6 62.88 1.68
 1 6 -6 60.55 2.15
 -1 -6 -6 60.76 1.66
 1 6 -6 61.11 2.04
 1 -6 6 62.58 2.15
 1 -6 6 62.04 2.1
 -1 6 6 59.75 1.74
 1 -6 -6 61.17 1.84
 1 -6 -6 61.67 1.79
 -1 6 -6 63.71 2.06
 -1 -6 6 60.66 2.02
 -1 -6 6 64.4 2.15
 -1 6 -6 61.26 2.13
 -2 -6 -6 52.76 1.65
 -2 -6 -6 59 1.76
 -2 6 6 53.76 1.76
 2 6 -6 53.51 2.06
 -2 6 6 56.02 1.89
 2 -6 6 54.67 1.92
 2 6 -6 54.35 1.95
 -2 6 -6 54.89 2.06
 -2 6 -6 55.58 1.95
 -2 -6 6 60.18 2.08
 2 -6 -6 56.3 1.79
 2 -6 -6 53.78 1.86
 2 6 6 54.83 1.6
 -2 -6 6 55.2 1.95
 3 6 -6 10.26 0.74
 -3 -6 -6 8.72 0.56
 3 6 -6 8.15 0.76
 3 -6 6 9.24 0.69
 -3 6 6 8.21 0.71
 -3 -6 -6 9.21 0.65
 -3 6 6 8.75 0.61
 -3 -6 6 8.27 0.74
 -3 -6 6 8.81 0.7
 3 -6 -6 8.45 0.63
 -3 6 -6 8.92 0.76
 3 6 6 9.16 0.53
 3 -6 -6 8.4 0.69
 -3 6 -6 8.13 0.68
 -4 6 6 4.39 0.65
 -4 -6 -6 4.61 0.53
 4 6 -6 4.72 0.64
 4 -6 6 5.42 0.65
 4 6 -6 5.11 0.77
 -4 -6 6 4.82 0.65
 -4 6 -6 4.73 0.67
 4 -6 -6 5.01 0.62
 4 -6 -6 4.7 0.69
 -5 -6 -6 30.04 1.46
 5 6 -6 30.84 1.77
 -5 6 6 31.79 1.55
 -5 6 6 32.67 1.73
 5 -6 6 32.6 1.58
 -5 6 -6 30.21 1.59
 5 -6 -6 31.57 1.56
 -5 -6 6 30.38 1.58
 5 -6 -6 30.4 1.62
 -6 -6 -6 0.59 0.34
 6 -6 6 -0.11 0.26
 6 6 -6 0.42 0.41
 -6 6 -6 -0.36 0.24
 -6 -6 6 0.15 0.39
 6 -6 -6 0.23 0.36
 7 6 -6 6.44 1.08
 -7 -6 -6 7.79 0.97
 7 -6 -6 8.98 1.19
 -7 -6 6 7.11 1.02
 0 7 -6 0.73 0.3
 0 -7 6 0.5 0.25
 0 7 -6 0.81 0.25
 0 7 -6 0.51 0.25
 -1 -7 -6 3.96 0.18
 1 -7 6 3.57 0.52
 -1 7 6 3.85 0.3
 1 7 -6 3.76 0.45
 1 7 -6 4.15 0.55
 1 -7 6 3.67 0.47
 -1 7 6 4.04 0.26
 1 -7 -6 3.88 0.29
 1 -7 -6 3.44 0.29
 -1 7 -6 3.3 0.43
 -1 7 -6 3.81 0.5
 -1 -7 6 3.54 0.48
 -1 -7 6 3.03 0.41
 2 7 -6 33.91 1.55
 -2 7 6 36.67 1.38
 -2 7 6 35.6 1.27
 2 7 -6 37.15 1.49
 -2 -7 -6 35.94 1.17
 -2 -7 -6 38.35 1.25
 -2 -7 6 37.83 1.57
 -2 -7 6 37.35 1.48
 -2 7 -6 37.89 1.49
 2 -7 -6 35.42 1.29
 2 -7 -6 35.2 1.34
 -2 7 -6 35.48 1.56
 2 7 6 35.35 1.09
 3 -7 6 26.73 1.24
 3 7 -6 26.46 1.27
 -3 7 6 25.17 1.12
 -3 7 6 26.48 1.26
 -3 -7 -6 25.31 1.04
 -3 -7 -6 26.52 1.15
 3 7 -6 25.29 1.39
 -3 7 -6 26.43 1.28
 -3 7 -6 27.81 1.4
 3 -7 -6 26.11 1.22
 -3 -7 6 25.21 1.25
 3 -7 -6 25.73 1.15
 -3 -7 6 25.1 1.34
 -4 7 6 13.96 0.88
 -4 -7 -6 13.97 0.83
 4 7 -6 16.95 1.05
 4 -7 6 15.19 0.97
 -4 7 6 13.2 0.99
 4 7 -6 13.44 1.1
 4 7 6 13.21 0.78
 -4 -7 6 14.37 0.99
 4 -7 -6 14.25 0.91
 4 -7 -6 14.58 0.99
 -4 7 -6 14.77 1
 -4 7 -6 15.29 1.1
 5 -7 6 3.79 0.63
 5 7 -6 3.94 0.77
 -5 7 6 3.29 0.66
 -5 7 6 3.96 0.6
 -5 -7 -6 2.89 0.51
 5 7 6 2.5 0.48
 5 -7 -6 3.68 0.6
 -5 7 -6 4.49 0.71
 5 -7 -6 3.1 0.63
 -5 -7 6 2.87 0.58
 -6 -7 -6 0.3 0.3
 6 7 -6 0.58 0.53
 -6 -7 6 0.49 0.38
 -6 7 -6 1.08 0.43
 6 -7 -6 0.77 0.41
 7 7 -6 4.06 0.94
 -7 -7 -6 3.65 0.74
 -7 -7 6 4.34 0.8
 7 -7 -6 4.39 0.88
 0 8 -6 21.5 1.02
 0 8 -6 19.12 1.03
 0 8 -6 22.24 1.02
 0 -8 6 23.29 1.11
 1 8 -6 17.67 0.9
 -1 8 6 17.37 0.6
 1 -8 6 15.28 0.93
 1 8 -6 15.34 0.93
 -1 8 6 16.17 0.66
 1 -8 -6 16.01 0.63
 -1 -8 6 15.91 0.86
 -1 -8 6 17.68 0.97
 -1 8 -6 17.02 0.89
 -1 8 -6 17.83 0.9
 -1 8 -6 15.05 0.92
 -2 8 6 3.57 0.43
 2 8 -6 3.59 0.48
 2 8 -6 4.31 0.59
 -2 8 6 3.39 0.36
 -2 -8 -6 3.41 0.28
 -2 -8 -6 3.78 0.32
 2 -8 6 4.04 0.53
 -2 8 -6 4.33 0.56
 -2 -8 6 4.13 0.52
 2 -8 -6 3.45 0.38
 -2 -8 6 3.58 0.54
 2 8 6 3.66 0.23
 2 -8 -6 3.76 0.41
 -2 8 -6 4.37 0.63
 3 -8 6 1.8 0.39
 -3 8 6 2.91 0.41
 -3 -8 -6 2.2 0.32
 -3 8 6 2.78 0.46
 3 8 -6 1.62 0.46
 -3 -8 -6 2.56 0.39
 3 8 -6 2.67 0.47
 -3 -8 6 1.76 0.41
 3 -8 -6 2.27 0.38
 -3 8 -6 2.61 0.55
 3 -8 -6 2.64 0.43
 -3 8 -6 2.43 0.48
 -4 8 6 0.35 0.25
 4 -8 6 0.37 0.26
 4 8 -6 0.15 0.36
 -4 8 6 0.49 0.31
 -4 -8 -6 0.14 0.21
 -4 8 -6 0.24 0.31
 -4 -8 6 0.12 0.26
 4 -8 -6 0.38 0.23
 4 -8 -6 0.51 0.31
 -4 8 -6 0.36 0.27
 4 8 6 0.66 0.26
 -5 -8 -6 1.72 0.42
 5 8 -6 0.63 0.41
 5 -8 6 0.8 0.38
 -5 8 6 1.55 0.51
 5 -8 -6 1.4 0.47
 -5 8 -6 1.44 0.43
 -5 -8 6 1.88 0.48
 5 -8 -6 0.55 0.31
 5 8 6 1.44 0.37
 6 8 -6 2.52 0.69
 -6 -8 -6 4.25 0.67
 6 -8 -6 1.74 0.55
 -6 8 -6 4.09 0.73
 6 8 6 2.98 0.56
 -6 -8 6 1.88 0.58
 7 8 -6 8.82 1.32
 -7 -8 -6 8.3 1.02
 -7 -8 6 7.65 1.03
 7 -8 -6 8.43 1.1
 0 9 -6 22.65 1.15
 0 9 -6 23.28 1.09
 0 9 -6 22.93 1.08
 0 -9 6 23.38 1.16
 1 9 -6 3.97 0.5
 1 -9 6 4.06 0.56
 -1 9 6 4.36 0.27
 -1 9 6 4.27 0.32
 1 9 -6 4.5 0.62
 1 -9 -6 4.47 0.31
 -1 9 -6 5.46 0.59
 -1 9 -6 3.91 0.48
 -1 -9 6 3.85 0.48
 -1 -9 6 5.26 0.61
 -1 9 -6 4.71 0.65
 -2 9 6 31.32 1.28
 2 -9 6 32.57 1.41
 -2 -9 -6 31.84 1.06
 2 9 -6 31.6 1.53
 -2 9 6 34.49 1.2
 2 9 -6 33.45 1.44
 -2 -9 -6 34.31 1.12
 -2 9 -6 32.55 1.43
 2 -9 -6 33.46 1.22
 -2 9 -6 33.36 1.54
 -2 -9 6 30.64 1.39
 2 9 6 32.49 0.96
 -2 -9 6 35.12 1.55
 3 -9 6 5.43 0.64
 3 9 -6 6.88 0.73
 3 9 -6 4.96 0.71
 -3 -9 -6 5.62 0.45
 -3 -9 -6 5.99 0.52
 -3 9 6 5.65 0.5
 -3 9 6 5.27 0.62
 3 9 6 5.2 0.42
 3 -9 -6 4.83 0.53
 -3 9 -6 6.98 0.76
 -3 -9 6 5.38 0.64
 3 -9 -6 4.84 0.54
 -3 9 -6 6.32 0.82
 4 9 -6 20.13 1.37
 4 -9 6 20.65 1.2
 -4 9 6 22.89 1.3
 -4 -9 -6 20.37 1.03
 -4 9 6 20.84 1.12
 4 9 6 21.94 1.03
 4 -9 -6 23.54 1.19
 -4 9 -6 23.09 1.4
 4 -9 -6 22.64 1.16
 -4 9 -6 22.05 1.27
 -4 -9 6 21.91 1.25
 -5 9 6 3.32 0.66
 -5 -9 -6 3.19 0.52
 5 -9 6 3.68 0.63
 5 9 -6 2.57 0.67
 5 9 6 3.43 0.53
 -5 -9 6 2.44 0.55
 -5 9 -6 3.61 0.65
 -5 9 -6 2.72 0.64
 5 -9 -6 3.45 0.6
 -6 -9 -6 0.47 0.32
 6 9 -6 0.42 0.49
 6 -9 -6 0.23 0.38
 6 9 6 1.35 0.39
 -6 -9 6 1.27 0.53
 0 10 -6 4.91 0.65
 0 -10 6 5.75 0.65
 0 10 -6 6.21 0.57
 0 10 -6 6.06 0.62
 1 -10 6 40.56 1.73
 -1 10 6 40.29 1.29
 1 10 -6 43.31 1.65
 1 10 -6 36.67 1.67
 -1 10 6 40.99 1.21
 -1 10 6 40.63 1.27
 -1 -10 6 40 1.59
 -1 10 -6 42.37 1.64
 -1 10 -6 38.65 1.59
 -1 -10 6 42.59 1.72
 -1 10 -6 37.5 1.67
 1 -10 -6 39.95 1.26
 -2 10 6 8.55 0.6
 2 -10 6 10.38 0.75
 -2 10 6 9.76 0.55
 2 10 -6 8.99 0.71
 -2 -10 -6 9.89 0.49
 -2 -10 -6 9.53 0.46
 2 10 -6 7.92 0.75
 -2 -10 6 8.79 0.71
 -2 10 -6 10.16 0.75
 -2 10 -6 10.26 0.83
 2 -10 -6 9.12 0.56
 -3 -10 -6 13.66 0.75
 -3 -10 -6 12.1 0.67
 -3 10 6 13.38 0.87
 -3 10 6 13.98 0.79
 3 -10 6 13.02 0.9
 3 10 -6 12.71 1.03
 -3 -10 6 14.78 0.95
 -3 10 -6 12.32 0.98
 3 10 6 13.51 0.66
 3 -10 -6 14.57 0.82
 -3 10 -6 14.19 0.96
 4 -10 6 4.43 0.65
 -4 -10 -6 3.48 0.46
 -4 10 6 3.4 0.6
 -4 10 6 4.96 0.62
 4 10 -6 4.29 0.75
 4 -10 -6 4.48 0.6
 -4 -10 6 3.11 0.53
 4 10 6 4.27 0.5
 -4 10 -6 4.11 0.76
 -4 10 -6 4.75 0.68
 -5 10 6 15.34 1.23
 -5 -10 -6 15.35 0.98
 5 10 -6 14.68 1.26
 -5 10 -6 15.56 1.23
 5 10 6 15.98 0.97
 -5 -10 6 15.61 1.14
 -5 10 -6 16.76 1.19
 6 10 -6 0.28 0.45
 -6 -10 -6 0.22 0.31
 6 10 6 0.35 0.31
 -6 -10 6 0.17 0.31
 -6 10 -6 0.11 0.33
 0 11 -6 2.76 0.44
 0 11 -6 3.79 0.58
 0 11 -6 3.68 0.52
 1 11 -6 6.39 0.6
 -1 11 6 6.52 0.34
 -1 11 6 6.77 0.39
 -1 11 6 6.65 0.41
 1 11 -6 7.25 0.82
 -1 -11 6 6.4 0.59
 -1 11 -6 7.94 0.65
 1 -11 -6 6.92 0.4
 -1 11 -6 5.72 0.69
 -1 11 -6 6.9 0.62
 -2 -11 -6 11.79 0.53
 -2 11 6 11.08 0.69
 -2 11 6 12.12 0.63
 2 -11 6 10.72 0.81
 -2 -11 -6 11.23 0.51
 2 11 -6 12.54 0.96
 -2 11 -6 12.63 0.94
 -2 11 -6 10.86 0.81
 -2 -11 6 12.42 0.85
 2 -11 -6 12.75 0.66
 3 -11 6 4.12 0.6
 -3 -11 -6 4.53 0.48
 -3 11 6 4.8 0.63
 3 11 -6 4.88 0.75
 -3 -11 -6 5.11 0.42
 -3 11 6 4.31 0.5
 -3 11 -6 5.11 0.77
 3 11 6 4.75 0.4
 -3 -11 6 4.78 0.61
 -3 11 -6 5.28 0.7
 3 -11 -6 4.91 0.54
 -4 11 6 4.53 0.69
 -4 11 6 5.84 0.67
 4 11 -6 3.78 0.75
 -4 -11 -6 4.28 0.5
 4 -11 6 3.8 0.63
 -4 11 -6 4.94 0.71
 4 -11 -6 3.18 0.5
 -4 -11 6 4.04 0.65
 4 11 6 4.73 0.53
 -4 11 -6 4.12 0.75
 5 11 -6 1.82 0.62
 -5 -11 -6 2.03 0.43
 -5 11 -6 1.89 0.62
 5 11 6 1.52 0.39
 -5 -11 6 2.17 0.53
 -6 -11 -6 2.11 0.52
 6 11 -6 0.73 0.52
 -6 11 -6 1.57 0.62
 6 11 6 1.42 0.43
 -6 -11 6 2.22 0.6
 0 12 -6 1.39 0.42
 0 12 -6 2.15 0.42
 -1 12 6 13.47 0.57
 1 12 -6 11.48 0.85
 1 12 -6 13.09 0.96
 -1 12 6 12.42 0.59
 -1 12 6 13.39 0.51
 -1 12 -6 11.76 0.83
 -1 12 -6 13.6 0.97
 -1 -12 6 12.54 0.84
 1 -12 -6 12.35 0.58
 2 12 -6 6.52 0.82
 -2 12 6 6.32 0.53
 -2 12 6 7.32 0.48
 -2 -12 -6 6.98 0.39
 -2 12 6 7.09 0.53
 -2 -12 -6 6.61 0.39
 2 -12 6 7.38 0.69
 -2 12 -6 6.07 0.78
 2 -12 -6 7.53 0.52
 -2 -12 6 7.78 0.69
 -2 12 -6 6 0.68
 3 12 -6 0.28 0.35
 3 -12 6 -0.03 0.23
 -3 -12 -6 -0.1 0.17
 -3 -12 -6 -0.04 0.14
 -3 12 6 0.07 0.15
 -3 12 6 0.12 0.2
 3 -12 -6 0.02 0.2
 -3 12 -6 0.02 0.27
 -3 -12 6 -0.04 0.25
 -3 12 -6 0.01 0.23
 3 12 6 -0.06 0.14
 -4 -12 -6 1.21 0.32
 4 12 -6 1.56 0.54
 -4 12 -6 2.17 0.54
 4 12 6 1.13 0.32
 -4 12 -6 2.08 0.58
 -4 -12 6 1.24 0.42
 4 -12 -6 1.72 0.41
 -5 -12 -6 4.67 0.6
 5 12 -6 3.75 0.83
 5 12 6 3.93 0.58
 -5 -12 6 3.23 0.63
 -5 12 -6 3.62 0.76
 6 12 -6 0.63 0.47
 -6 -12 -6 1.13 0.42
 -6 12 -6 1.47 0.63
 6 12 6 0.49 0.34
 -6 -12 6 0.64 0.4
 0 13 -6 1.54 0.45
 -1 13 6 2.7 0.31
 1 13 -6 3.4 0.63
 -1 13 6 3.01 0.31
 -1 13 6 2.95 0.24
 -1 13 -6 2.09 0.46
 -1 13 -6 2.82 0.53
 1 -13 -6 2.94 0.32
 -2 13 6 25.78 1
 -2 -13 -6 23.75 0.86
 2 -13 6 24.33 1.34
 2 13 -6 25.96 1.45
 -2 13 6 22.56 1.06
 -2 13 6 23.25 1.06
 -2 -13 -6 25.91 0.88
 -2 13 -6 24.57 1.3
 -2 13 -6 24.29 1.39
 -2 -13 6 23.15 1.25
 2 -13 -6 25.47 1.04
 3 -13 6 0.63 0.32
 -3 13 6 0.91 0.28
 -3 -13 -6 1.09 0.27
 3 13 -6 1.19 0.45
 -3 13 6 0.77 0.29
 -3 -13 -6 0.98 0.24
 -3 13 -6 0.64 0.4
 -3 -13 6 1.5 0.44
 3 -13 -6 1.16 0.31
 3 13 6 0.85 0.22
 -3 13 -6 0.78 0.34
 -4 -13 -6 8.56 0.64
 4 13 -6 7.21 1.03
 -4 13 -6 7.61 1.03
 4 13 6 8.12 0.61
 -4 -13 6 6.33 0.8
 -5 -13 -6 3.31 0.52
 5 13 -6 3.4 0.76
 -5 -13 6 2.52 0.57
 5 13 6 3.11 0.51
 -5 13 -6 3.82 0.81
 0 14 -6 5.76 0.8
 -1 14 6 6.44 0.4
 -1 14 6 6.06 0.42
 1 14 -6 6.03 0.81
 1 14 -6 7.81 0.67
 -1 14 -6 6.84 0.86
 1 -14 -6 7.06 0.44
 -2 14 6 5.43 0.5
 -2 14 6 5.44 0.43
 -2 -14 -6 5.92 0.36
 -2 -14 -6 5.02 0.34
 2 14 -6 4.62 0.75
 2 -14 6 5.03 0.74
 2 -14 -6 5.35 0.46
 -2 14 -6 5.08 0.67
 -2 -14 6 6.45 0.77
 -2 14 -6 4.3 0.7
 3 14 -6 4.88 0.79
 -3 14 6 4.18 0.58
 -3 14 6 4.86 0.54
 -3 -14 -6 4.32 0.41
 3 14 6 4.44 0.38
 3 -14 -6 4.41 0.53
 -3 -14 6 4.92 0.69
 -3 14 -6 4.44 0.78
 4 14 -6 0.16 0.37
 -4 -14 -6 0.12 0.2
 4 14 6 0.19 0.22
 -4 14 -6 0.71 0.41
 -4 -14 6 -0.12 0.28
 -5 -14 -6 1.73 0.42
 5 14 -6 2.59 0.71
 -5 -14 6 1.24 0.47
 -5 14 -6 2.24 0.65
 5 14 6 2.21 0.44
 0 15 -6 0.33 0.26
 0 15 -6 0.21 0.29
 -1 15 6 8.1 0.47
 -1 15 6 8.71 0.5
 1 15 -6 9.74 1.09
 1 -15 -6 9.73 0.57
 -1 15 -6 8.43 0.97
 -2 15 6 1.29 0.31
 -2 15 6 1.8 0.31
 -2 -15 -6 1.63 0.22
 2 15 -6 1.74 0.52
 2 -15 -6 1.58 0.29
 -2 -15 6 1.68 0.44
 -2 15 -6 1.66 0.51
 -3 15 6 13.79 0.89
 -3 -15 -6 12.43 0.68
 3 15 -6 13.59 1.16
 -3 -15 6 13.31 1.01
 3 -15 -6 13.47 0.84
 3 15 6 13.6 0.65
 -3 15 -6 15.41 1.19
 -4 -15 -6 9.7 0.7
 4 15 -6 10.39 1.26
 -4 -15 6 10.41 0.95
 -4 15 -6 7.45 1.08
 4 15 6 11.01 0.69
 0 16 -6 18.91 1.25
 -1 16 6 9.94 0.52
 1 16 -6 8.56 1.03
 -1 16 -6 8.95 1.04
 -2 16 6 0.1 0.2
 2 16 -6 0.47 0.41
 -2 16 -6 -0.21 0.26
 2 -16 -6 0.07 0.18
 -2 -16 6 0.28 0.27
 -3 16 6 3.14 0.52
 -3 -16 -6 3.64 0.41
 3 16 -6 2.01 0.62
 -3 16 -6 3.44 0.69
 -3 -16 6 3.26 0.6
 3 16 6 4.01 0.35
 -4 16 6 19.28 1.22
 -4 -16 -6 20.71 1.04
 4 16 -6 20.92 1.56
 -4 -16 6 20.75 1.36
 4 16 6 21.63 1
 -4 16 -6 22.46 1.54
 0 17 -6 5.62 0.84
 1 17 -6 3.22 0.69
 -1 17 6 3.22 0.35
 -1 17 -6 3.82 0.69
 2 17 -6 1.42 0.55
 -2 17 6 1.48 0.33
 2 -17 -6 1.89 0.35
 -2 17 -6 0.73 0.45
 -3 -17 -6 2.6 0.35
 -3 17 6 2.71 0.49
 3 17 -6 2.43 0.67
 3 17 6 2.84 0.32
 -3 -17 6 2.87 0.59
 -3 17 -6 3.54 0.76
 0 18 -6 1 0.44
 -1 18 6 0.44 0.19
 1 18 -6 0.36 0.4
 -1 18 -6 0.72 0.41
 -2 18 6 0.72 0.28
 2 18 -6 0.69 0.46
 -2 18 -6 0.58 0.44
 -3 -18 -6 0.5 0.21
 -3 18 6 0.48 0.29
 3 18 -6 1.06 0.46
 -3 -18 6 0.08 0.31
 -3 18 -6 1.09 0.51
 0 19 -6 1.35 0.52
 1 19 -6 4.59 0.84
 -1 19 -6 3.35 0.7
 -2 19 6 5.51 0.58
 -2 19 -6 4.08 0.8
 0 0 -7 0.33 0.15
 0 0 7 0.6 0.2
 0 0 -7 0.19 0.17
 1 0 7 183.78 5.17
 1 0 7 189.78 5.14
 1 0 -7 198.07 5.16
 -1 0 -7 188 5.1
 -1 0 7 188.75 5.2
 -1 0 -7 190.79 5.18
 1 0 -7 189.26 5.25
 -2 0 7 50.73 1.74
 2 0 -7 50.12 1.75
 2 0 7 49.91 1.66
 -2 0 -7 51.81 1.71
 2 0 -7 51.27 1.89
 -2 0 -7 51.77 1.79
 -2 0 7 52.53 1.85
 -3 0 -7 0.53 0.25
 3 0 -7 0.13 0.2
 -3 0 7 0.5 0.29
 3 0 7 0.57 0.23
 3 0 -7 0.02 0.23
 -3 0 7 0.16 0.2
 4 0 7 46.2 1.79
 4 0 -7 50.28 1.95
 4 0 -7 48.95 2.13
 -4 0 7 47.23 1.9
 -4 0 7 47.82 2.07
 -4 0 -7 47.39 1.87
 -5 0 7 5.2 0.73
 5 0 -7 3.53 0.69
 5 0 -7 4.66 0.67
 -5 0 -7 2.89 0.54
 6 0 -7 5.89 0.99
 6 0 -7 6.86 0.9
 -6 0 7 7.83 0.96
 -6 0 -7 6.06 0.83
 -7 0 -7 3.58 0.74
 7 0 -7 5.13 1
 0 -1 7 134.78 3.91
 0 -1 -7 142.09 3.85
 0 1 -7 141.31 3.85
 0 1 7 141.54 3.84
 0 -1 -7 142.36 3.78
 0 1 -7 135.3 3.91
 -1 1 7 85.11 2.59
 -1 -1 -7 85.55 2.55
 -1 1 7 86.64 2.52
 1 -1 7 89.31 2.61
 1 -1 7 87.03 2.65
 1 1 -7 85.38 2.58
 -1 -1 -7 85.99 2.49
 1 1 -7 91.91 2.71
 1 1 7 85.6 2.53
 -1 -1 7 89.95 2.67
 1 1 7 89.11 2.57
 -1 -1 7 85.88 2.57
 -1 1 -7 86.77 2.57
 1 -1 -7 87.76 2.64
 -1 1 -7 85.4 2.63
 1 -1 -7 88.83 2.55
 -2 -1 -7 142.54 4.08
 2 -1 7 147.69 4.03
 2 1 -7 137.82 4.23
 -2 -1 -7 143.36 4
 2 1 -7 146.26 4.12
 -2 1 7 147.25 4.19
 2 1 7 143.68 3.96
 -2 -1 7 143.66 4.09
 -2 -1 7 147.27 4.23
 -2 1 -7 139.48 4.16
 -2 1 -7 143.77 4.06
 2 -1 -7 137.43 4.19
 2 -1 -7 139.56 4.06
 3 1 -7 25.18 1.19
 -3 -1 -7 23.99 1.09
 -3 1 7 24.59 1.13
 -3 -1 -7 26.56 1.14
 3 -1 7 26.14 1.11
 3 1 -7 24.26 1.3
 -3 1 7 25.11 1.26
 -3 1 -7 26.02 1.15
 -3 -1 7 24.33 1.27
 -3 -1 7 25.4 1.18
 3 -1 -7 25.66 1.29
 3 1 7 25.79 1.08
 3 -1 -7 26.28 1.18
 -4 1 7 11.83 0.84
 -4 1 7 13.78 1
 4 1 -7 13.38 0.92
 -4 -1 -7 11.64 0.82
 4 1 -7 12.43 0.99
 4 -1 7 12.2 0.81
 4 1 7 13.58 0.81
 4 -1 -7 14.59 0.94
 -4 -1 7 13.58 1
 4 -1 -7 10.88 0.97
 -4 -1 7 12.69 0.88
 -4 1 -7 12 0.85
 -5 1 7 16.09 1.08
 -5 1 7 16.43 1.22
 5 1 -7 16.81 1.13
 5 1 -7 15.15 1.24
 -5 -1 -7 17.73 1.1
 5 -1 -7 17.91 1.14
 -5 1 -7 15.31 1.07
 -5 -1 7 16.63 1.1
 5 -1 -7 17.88 1.28
 6 1 -7 19.29 1.5
 6 1 -7 21.78 1.36
 -6 -1 -7 18.57 1.26
 -6 1 7 19.17 1.27
 6 -1 -7 19.37 1.37
 -6 1 -7 16.54 1.23
 -6 -1 7 17.76 1.24
 6 -1 -7 17.96 1.41
 -7 -1 -7 1.37 0.54
 7 1 -7 1.19 0.59
 -7 1 -7 1.36 0.55
 7 -1 -7 1.42 0.58
 0 2 -7 222.6 6.15
 0 2 7 221.17 5.97
 0 -2 7 231.47 6.16
 0 2 -7 238.17 6.09
 0 -2 -7 224.25 5.92
 0 -2 -7 224.13 5.98
 -1 2 7 24.61 0.96
 -1 2 7 23.01 0.88
 1 2 -7 23.79 0.98
 -1 -2 -7 23.15 0.85
 1 -2 7 25.11 1.02
 1 2 -7 22.93 1.04
 1 -2 7 23.13 1.03
 -1 -2 -7 23.59 0.89
 -1 -2 7 24.05 1.05
 1 -2 -7 23.56 0.9
 -1 -2 7 24.2 0.98
 -1 2 -7 23.24 1.02
 1 -2 -7 21.57 0.95
 -1 2 -7 23.97 0.97
 -2 2 7 71.19 2.35
 -2 2 7 73.6 2.25
 -2 -2 -7 72.62 2.19
 2 -2 7 72.31 2.26
 2 2 -7 69.86 2.44
 2 2 -7 75.23 2.34
 -2 2 -7 71.69 2.29
 2 -2 -7 67.57 2.36
 2 -2 -7 73.33 2.27
 -2 2 -7 72.24 2.4
 -2 -2 7 68.86 2.29
 2 2 7 72.19 2.14
 -2 -2 7 74.98 2.45
 3 -2 7 7.98 0.6
 -3 2 7 8.3 0.62
 3 2 -7 8.04 0.66
 -3 2 7 9.85 0.76
 -3 -2 -7 8.93 0.65
 3 2 -7 9.35 0.8
 -3 -2 -7 8.58 0.6
 3 -2 -7 8.97 0.73
 3 -2 -7 9.34 0.67
 -3 2 -7 7.95 0.64
 3 2 7 8.85 0.57
 -3 -2 7 9.78 0.79
 -3 -2 7 8.02 0.66
 4 2 -7 1.15 0.41
 -4 2 7 1.88 0.48
 4 -2 7 1.95 0.39
 -4 2 7 1.52 0.39
 -4 -2 -7 2.8 0.48
 4 2 -7 1.92 0.43
 -4 -2 7 1.85 0.49
 -4 2 -7 2.79 0.49
 4 -2 -7 1.41 0.46
 4 -2 -7 1.74 0.43
 -4 -2 7 2.15 0.46
 5 2 -7 3.55 0.58
 -5 2 7 2.95 0.6
 5 2 -7 2.05 0.57
 -5 -2 -7 2.34 0.49
 -5 2 7 1.86 0.45
 5 -2 -7 3.24 0.71
 -5 2 -7 3.02 0.58
 -5 -2 7 2.78 0.51
 5 -2 -7 2.87 0.57
 6 2 -7 12.61 1.06
 6 2 -7 14.53 1.33
 -6 2 7 13.44 1.05
 -6 -2 -7 13.39 1.07
 -6 2 -7 13.35 1.1
 6 -2 -7 13.25 1.41
 -6 -2 7 13.6 1.09
 7 2 -7 1.67 0.71
 -7 -2 -7 2.17 0.6
 7 -2 -7 3.07 0.74
 -7 2 -7 1.2 0.49
 0 3 7 21.56 0.78
 0 3 -7 21.59 0.92
 0 -3 -7 22.4 0.81
 0 -3 -7 22.11 0.76
 0 3 -7 21.34 0.98
 0 -3 7 22.57 0.98
 1 -3 7 15.9 0.83
 -1 -3 -7 15.57 0.61
 -1 3 7 15.73 0.65
 -1 -3 -7 14.29 0.63
 1 3 -7 14.95 0.83
 1 3 -7 16.11 0.79
 -1 3 7 15.04 0.69
 1 -3 7 15.08 0.79
 -1 -3 7 14.82 0.75
 -1 3 -7 15.25 0.81
 -1 3 -7 14.78 0.75
 -1 -3 7 15.1 0.83
 1 -3 -7 15.6 0.73
 1 -3 -7 16.21 0.67
 2 3 -7 23.61 1.16
 2 -3 7 22.37 0.98
 -2 3 7 20.91 1
 -2 3 7 21.38 0.92
 2 3 -7 25.05 1.07
 -2 -3 -7 21.12 0.87
 -2 3 -7 20.52 0.98
 -2 -3 7 23.07 1.03
 2 3 7 21.83 0.84
 2 -3 -7 22.4 0.95
 -2 3 -7 22.44 1.1
 2 -3 -7 21.24 1.04
 -2 -3 7 23.4 1.12
 -3 3 7 17.73 1
 -3 -3 -7 15.83 0.82
 3 3 -7 16.18 1.06
 -3 -3 -7 17.11 0.89
 3 -3 7 17.06 0.89
 3 3 -7 18.08 0.97
 -3 -3 7 13.81 0.95
 3 -3 -7 17.79 0.93
 -3 -3 7 16.36 0.94
 -3 3 -7 14.83 0.9
 -3 3 -7 15.71 0.98
 3 3 7 16.71 0.79
 3 -3 -7 16.17 1.01
 -4 3 7 10.39 0.77
 4 -3 7 10.6 0.78
 4 3 -7 10.45 0.95
 -4 3 7 11.66 0.94
 4 3 -7 9.39 0.8
 -4 -3 -7 10.83 0.76
 -4 3 -7 9.84 0.81
 -4 -3 7 9.87 0.81
 4 -3 -7 10.66 0.93
 4 -3 -7 10.73 0.8
 -4 -3 7 11.86 0.96
 5 3 -7 7.39 0.99
 -5 3 7 10.41 0.97
 -5 3 7 9.29 0.82
 5 -3 7 8.95 0.79
 -5 -3 -7 10.72 0.84
 5 3 -7 9.22 0.86
 5 -3 -7 10.15 0.86
 -5 -3 7 9.9 0.88
 5 -3 -7 10.89 1.02
 -5 3 -7 10 0.87
 -6 -3 -7 0.36 0.35
 6 3 -7 0.07 0.33
 6 3 -7 0.43 0.46
 -6 3 7 0.42 0.32
 6 -3 -7 0.6 0.46
 -6 -3 7 1.47 0.45
 -6 3 -7 1.07 0.49
 7 3 -7 2.45 0.75
 -7 -3 -7 2.49 0.62
 7 -3 -7 2.26 0.73
 -7 3 -7 1.91 0.57
 -7 -3 7 1.59 0.54
 0 -4 -7 40.76 1.22
 0 -4 -7 42.99 1.28
 0 4 -7 40.88 1.46
 0 -4 7 42.34 1.54
 0 4 -7 39.94 1.53
 1 -4 7 33.77 1.34
 -1 4 7 32.66 1.06
 -1 -4 -7 31.97 1.04
 1 4 -7 32.42 1.36
 1 -4 7 30.4 1.28
 1 4 -7 33.38 1.27
 -1 -4 -7 31.21 1
 -1 4 7 30.72 1.11
 -1 -4 7 35.54 1.36
 1 -4 -7 33.13 1.09
 -1 4 -7 30.47 1.29
 -1 -4 7 29.66 1.21
 1 -4 -7 32.08 1.16
 -1 4 -7 30.29 1.22
 2 4 -7 26.89 1.27
 2 4 -7 27.88 1.19
 -2 -4 -7 26.48 1
 -2 -4 -7 25.17 0.96
 -2 4 7 26.15 1.13
 2 -4 7 26.61 1.13
 -2 4 7 26.35 1.03
 -2 -4 7 27.92 1.27
 2 4 7 25.71 0.92
 -2 4 -7 27.27 1.16
 -2 -4 7 23.97 1.12
 2 -4 -7 25.76 1.14
 2 -4 -7 26.82 1.07
 -2 4 -7 25.78 1.24
 -3 4 7 0.94 0.27
 3 4 -7 0.94 0.37
 3 -4 7 1.11 0.32
 3 4 -7 1.32 0.36
 -3 -4 -7 0.58 0.27
 -3 4 7 0.7 0.3
 -3 -4 -7 0.95 0.27
 3 -4 -7 0.6 0.31
 -3 4 -7 0.74 0.31
 -3 4 -7 0.73 0.29
 3 4 7 1.18 0.25
 -3 -4 7 0.68 0.3
 -3 -4 7 1.11 0.36
 3 -4 -7 0.47 0.22
 -4 4 7 0.17 0.23
 -4 -4 -7 0.04 0.21
 4 4 -7 -0.24 0.26
 4 -4 7 -0.17 0.2
 -4 4 7 0.18 0.29
 4 4 -7 0.25 0.29
 -4 -4 7 0.22 0.28
 -4 -4 7 0.25 0.28
 4 -4 -7 0.2 0.3
 4 -4 -7 0.09 0.23
 -4 4 -7 -0.02 0.27
 5 4 -7 18.4 1.17
 -5 4 7 15.81 1.22
 5 -4 7 18.01 1.11
 -5 4 7 15.8 1.06
 5 4 -7 14.93 1.25
 -5 -4 -7 16.68 1.06
 -5 4 -7 15.84 1.11
 5 -4 -7 17.07 1.11
 5 -4 -7 17.56 1.25
 -5 -4 7 17.71 1.15
 -6 -4 -7 5.14 0.73
 6 4 -7 5.82 0.99
 -6 4 -7 7.21 0.96
 6 -4 -7 5.84 0.95
 -6 -4 7 4.84 0.74
 -7 -4 -7 0.33 0.44
 7 4 -7 0.11 0.49
 -7 4 -7 0.19 0.38
 -7 -4 7 0.66 0.41
 7 -4 -7 0.61 0.5
 0 5 -7 0.12 0.19
 0 -5 -7 0.22 0.09
 0 5 7 0.32 0.1
 0 5 -7 0.38 0.22
 0 -5 7 0.25 0.19
 0 5 -7 0.15 0.2
 0 -5 -7 0.5 0.13
 -1 5 7 33.08 1.07
 1 5 -7 33.87 1.32
 -1 5 7 33.67 1.14
 1 5 -7 31.8 1.39
 1 -5 7 32.3 1.37
 -1 -5 -7 32.68 1.01
 -1 -5 -7 33.1 1.03
 1 -5 7 32.73 1.38
 1 -5 -7 34.16 1.18
 -1 5 -7 34.08 1.4
 1 -5 -7 32.86 1.11
 -1 5 -7 35.22 1.34
 -1 -5 7 34.35 1.32
 -1 -5 7 37.1 1.44
 -2 -5 -7 12.87 0.59
 2 5 -7 11.83 0.86
 -2 5 7 12.95 0.65
 -2 -5 -7 12.78 0.63
 2 -5 7 13.28 0.76
 2 5 -7 13.07 0.79
 -2 5 7 12.97 0.74
 -2 -5 7 12.37 0.76
 -2 5 -7 12.09 0.84
 2 -5 -7 12.35 0.67
 2 5 7 12.54 0.54
 -2 5 -7 12.86 0.77
 -2 -5 7 13.63 0.84
 2 -5 -7 11.38 0.72
 3 -5 7 9.32 0.68
 -3 -5 -7 7.87 0.55
 -3 -5 -7 9.27 0.65
 -3 5 7 8.43 0.6
 3 5 -7 7.43 0.85
 -3 5 7 9.73 0.74
 3 5 -7 8.4 0.7
 -3 5 -7 9.55 0.81
 3 5 7 9.02 0.53
 3 -5 -7 8.82 0.73
 -3 -5 7 8.63 0.68
 -3 5 -7 9.01 0.71
 3 -5 -7 8.54 0.63
 -3 -5 7 8.61 0.79
 4 5 -7 23.13 1.42
 -4 -5 -7 21.25 1.09
 4 5 -7 24.46 1.3
 4 -5 7 21.82 1.19
 -4 5 7 24.31 1.34
 4 -5 -7 23.12 1.19
 -4 5 -7 21.67 1.22
 4 -5 -7 23.74 1.33
 -4 -5 7 22.78 1.25
 -5 5 7 6.35 0.86
 5 5 -7 3.48 0.7
 -5 5 7 5.54 0.7
 5 5 -7 5.74 0.8
 5 -5 7 4.65 0.66
 -5 -5 -7 4.28 0.62
 5 -5 -7 4.28 0.76
 -5 5 -7 5.68 0.79
 -5 -5 7 5.62 0.79
 5 -5 -7 5.79 0.73
 -6 -5 -7 1.91 0.51
 6 5 -7 2.09 0.65
 -6 -5 7 2.34 0.57
 6 -5 -7 2.74 0.69
 -6 5 -7 2.88 0.63
 7 5 -7 0.5 0.43
 -7 -5 -7 0.79 0.46
 7 -5 -7 1.68 0.59
 -7 5 -7 0.77 0.45
 -7 -5 7 1.16 0.47
 0 6 -7 0.16 0.22
 0 6 -7 0.01 0.18
 0 -6 7 -0.07 0.19
 0 -6 -7 0.05 0.07
 0 6 -7 0.26 0.2
 0 -6 -7 0.27 0.08
 1 6 -7 2.08 0.45
 -1 -6 -7 1.7 0.16
 -1 6 7 1.78 0.21
 -1 -6 -7 1.72 0.16
 1 -6 7 1.33 0.34
 1 6 -7 1.8 0.36
 -1 -6 -7 1.71 0.17
 1 -6 -7 1.93 0.27
 -1 -6 7 1.35 0.34
 1 -6 -7 1.73 0.23
 -1 6 -7 1.7 0.38
 -1 6 -7 1.89 0.36
 -1 -6 7 1.5 0.31
 2 -6 7 14.36 0.82
 2 6 -7 14.24 0.95
 -2 6 7 14.68 0.78
 -2 6 7 14.07 0.68
 2 6 -7 13.11 0.82
 -2 -6 -7 13.59 0.6
 -2 -6 -7 14.38 0.67
 2 6 7 13.99 0.55
 -2 -6 7 13.13 0.86
 -2 -6 7 13.63 0.83
 -2 6 -7 13.98 0.84
 -2 6 -7 13.91 0.9
 2 -6 -7 15.08 0.73
 2 -6 -7 14.93 0.8
 -3 -6 -7 31.52 1.28
 -3 -6 -7 28.61 1.15
 3 -6 7 28 1.31
 3 6 -7 25.63 1.44
 3 6 -7 30.1 1.38
 -3 6 7 31.96 1.41
 -3 6 7 28.84 1.22
 -3 -6 7 27.47 1.34
 -3 6 -7 30.1 1.37
 -3 -6 7 32.02 1.52
 3 -6 -7 29.1 1.25
 3 -6 -7 28.82 1.36
 -3 6 -7 29.5 1.47
 -4 6 7 9.3 0.85
 4 -6 7 10.7 0.82
 -4 -6 -7 9.63 0.69
 4 6 -7 7.64 0.94
 4 6 -7 9.83 0.83
 -4 6 7 8.75 0.7
 -4 6 -7 10.16 1.06
 4 -6 -7 10.13 0.87
 -4 6 -7 9.08 0.8
 4 -6 -7 10.15 0.78
 -4 -6 7 9.36 0.81
 -5 6 7 10.29 0.85
 5 -6 7 11.16 0.92
 -5 6 7 11.16 1.19
 5 6 -7 9.14 1.11
 -5 -6 -7 9.67 0.81
 5 6 -7 10.96 0.94
 -5 -6 7 9.7 0.91
 5 -6 -7 9.81 0.86
 5 -6 -7 9.94 0.93
 -5 6 -7 10.59 0.93
 -6 -6 -7 3.49 0.65
 6 6 -7 2.99 0.72
 6 -6 -7 3.26 0.68
 -6 6 -7 3.86 0.68
 -6 -6 7 3.57 0.71
 7 6 -7 6.78 1.22
 -7 -6 -7 3.67 0.68
 -7 -6 7 6.16 0.96
 -7 6 -7 3.44 0.75
 7 -6 -7 5.2 0.89
 0 7 -7 82.18 2.64
 0 -7 7 77.8 2.67
 0 7 -7 78.46 2.69
 0 7 -7 87.67 2.64
 -1 -7 -7 9.88 0.35
 -1 7 7 9.21 0.48
 -1 7 7 10.83 0.44
 1 -7 7 10.48 0.76
 1 7 -7 11.24 0.71
 1 7 -7 10.07 0.76
 -1 -7 7 11.91 0.78
 -1 7 -7 10.38 0.68
 1 -7 -7 9.77 0.5
 -1 7 -7 10.14 0.74
 -1 -7 7 9.69 0.67
 1 -7 -7 10.09 0.48
 -1 7 -7 10.6 0.7
 2 -7 7 21.97 1.05
 -2 7 7 21.63 0.97
 2 7 -7 19.6 1.15
 -2 -7 -7 22.73 0.85
 -2 -7 -7 19.04 0.76
 2 7 -7 21.76 1.08
 -2 7 7 20.72 0.86
 2 7 7 19.86 0.69
 2 -7 -7 20.33 0.94
 -2 -7 7 22.84 1.18
 -2 7 -7 21.96 1.16
 -2 -7 7 19.85 1.04
 -2 7 -7 19.05 1.04
 2 -7 -7 20.69 0.89
 3 -7 7 3.95 0.55
 3 7 -7 4.3 0.6
 3 7 -7 3.93 0.65
 -3 -7 -7 3.11 0.38
 -3 7 7 3.69 0.47
 -3 7 7 3.94 0.56
 -3 -7 -7 3.65 0.46
 -3 7 -7 3.02 0.58
 3 -7 -7 3.96 0.5
 -3 7 -7 3.06 0.52
 -3 -7 7 2.97 0.51
 3 -7 -7 3.56 0.53
 4 7 -7 20.75 1.37
 -4 7 7 21.36 1.25
 4 7 -7 20.73 1.22
 4 -7 7 20.71 1.16
 -4 7 7 19.75 1.07
 -4 -7 -7 18.73 0.99
 4 -7 -7 18.2 1.07
 -4 7 -7 18.44 1.15
 -4 7 -7 18.58 1.23
 4 -7 -7 20.33 1.2
 -4 -7 7 19.88 1.18
 -5 7 7 5.15 0.81
 -5 -7 -7 3.95 0.61
 5 -7 7 3.56 0.59
 5 7 -7 3.83 0.78
 5 -7 -7 4.53 0.68
 -5 7 -7 3.41 0.62
 -5 -7 7 4.68 0.69
 5 -7 -7 4.14 0.71
 -6 -7 -7 5.2 0.72
 6 7 -7 6.46 1.07
 6 -7 -7 5.58 0.89
 -6 -7 7 5.28 0.83
 -6 7 -7 4.8 0.77
 -7 -7 -7 5.53 0.85
 7 7 -7 5.89 1.1
 7 -7 -7 4.89 0.87
 -7 -7 7 7.2 1.01
 0 -8 7 6.36 0.68
 0 8 -7 4.25 0.51
 0 8 -7 4.42 0.51
 0 8 -7 5.83 0.65
 1 8 -7 8.03 0.68
 1 -8 7 6.6 0.62
 -1 8 7 7.24 0.39
 1 8 -7 7.61 0.62
 -1 8 7 7.05 0.34
 -1 -8 7 7.18 0.59
 -1 8 -7 6.95 0.6
 -1 8 -7 6.82 0.59
 -1 8 -7 6.94 0.63
 -1 -8 7 7.09 0.66
 1 -8 -7 6.98 0.39
 1 -8 -7 6.27 0.37
 -2 8 7 3.88 0.35
 2 8 -7 4.38 0.64
 2 -8 7 3.81 0.51
 -2 -8 -7 3.97 0.3
 -2 8 7 4.72 0.44
 -2 -8 -7 4.11 0.34
 2 8 -7 4.65 0.59
 2 -8 -7 4.81 0.44
 2 -8 -7 4.65 0.41
 -2 -8 7 5.31 0.61
 -2 8 -7 4.52 0.65
 -2 8 -7 4.38 0.58
 -2 -8 7 4.8 0.63
 2 8 7 4.31 0.23
 -3 -8 -7 0.77 0.26
 -3 8 7 0.41 0.26
 -3 8 7 0.92 0.26
 3 -8 7 0.77 0.3
 3 8 -7 0.55 0.34
 -3 -8 -7 0.56 0.2
 3 8 -7 0.7 0.3
 -3 8 -7 0.56 0.34
 3 -8 -7 0.48 0.27
 3 -8 -7 0.66 0.25
 -3 -8 7 0.51 0.27
 -3 8 -7 0.62 0.3
 -4 -8 -7 5.75 0.54
 -4 8 7 5.98 0.67
 4 8 -7 5.87 0.82
 -4 8 7 5.85 0.78
 4 -8 7 6.66 0.77
 4 -8 -7 7.4 0.82
 -4 8 -7 6.32 0.87
 -4 -8 7 5.61 0.72
 4 -8 -7 4.62 0.59
 -4 8 -7 6.51 0.78
 5 8 -7 0.15 0.34
 -5 8 7 0.15 0.26
 -5 -8 -7 -0.03 0.22
 5 -8 7 0.09 0.31
 5 -8 -7 0.13 0.3
 -5 8 -7 0.05 0.3
 -5 8 -7 0.08 0.28
 -5 -8 7 0.69 0.35
 6 8 -7 -0.04 0.4
 -6 -8 -7 0.61 0.37
 6 -8 -7 0.23 0.34
 -6 -8 7 -0.04 0.32
 -6 8 -7 0.69 0.41
 0 9 -7 45.88 1.73
 0 -9 7 46.36 1.83
 0 9 -7 42.23 1.78
 0 9 -7 44.98 1.72
 1 9 -7 7.41 0.63
 -1 9 7 7.53 0.34
 -1 9 7 6.96 0.39
 1 9 -7 7.23 0.67
 1 -9 7 8.16 0.7
 1 -9 -7 6.56 0.37
 -1 -9 7 8.32 0.68
 -1 9 -7 7.68 0.64
 -1 9 -7 6.19 0.69
 -1 -9 7 6.75 0.59
 -1 9 -7 7.09 0.61
 -2 -9 -7 2.4 0.25
 2 9 -7 2.49 0.45
 2 -9 7 1.59 0.37
 -2 9 7 1.97 0.35
 -2 9 7 2.53 0.31
 -2 -9 -7 2.11 0.26
 2 9 -7 2.69 0.53
 -2 -9 7 2.34 0.42
 -2 9 -7 1.73 0.4
 2 -9 -7 2.68 0.34
 2 -9 -7 1.65 0.29
 -2 9 -7 2.43 0.53
 -3 -9 -7 21.46 0.99
 3 -9 7 23.28 1.21
 -3 9 7 21.92 1.14
 -3 -9 -7 21.07 0.9
 3 9 -7 24.29 1.25
 -3 9 7 20.92 1
 3 9 -7 19.11 1.25
 -3 9 -7 21.67 1.2
 3 -9 -7 21.26 1.06
 -3 9 -7 21.83 1.32
 -3 -9 7 21.82 1.19
 3 -9 -7 22.18 1.05
 4 -9 7 2.07 0.46
 -4 -9 -7 2.44 0.4
 4 9 -7 1.93 0.55
 -4 9 7 1.71 0.39
 -4 9 7 3.2 0.56
 -4 -9 7 2.5 0.51
 -4 9 -7 2.37 0.54
 4 -9 -7 1.71 0.43
 4 -9 -7 2.37 0.45
 -4 9 -7 1.12 0.43
 5 9 -7 3.48 0.73
 5 -9 7 3.12 0.62
 -5 -9 -7 3.01 0.51
 -5 9 7 3.02 0.62
 -5 9 -7 1.85 0.56
 -5 -9 7 3.24 0.64
 -5 9 -7 2.53 0.62
 5 -9 -7 2.92 0.58
 -6 -9 -7 7.2 0.86
 6 9 -7 7.48 1.2
 6 -9 -7 8.56 1.02
 -6 -9 7 9.16 1.1
 -6 9 -7 7.87 1.15
 0 10 -7 1.07 0.36
 0 10 -7 0.9 0.3
 0 -10 7 1.33 0.37
 0 10 -7 1.67 0.38
 -1 10 7 3.37 0.21
 1 10 -7 2.85 0.5
 -1 10 7 3.3 0.27
 1 10 -7 3.35 0.5
 -1 10 7 2.87 0.27
 -1 10 -7 5.39 0.64
 -1 10 -7 3.73 0.57
 -1 -10 7 3.08 0.48
 -1 10 -7 3.42 0.49
 1 -10 -7 3.56 0.28
 -2 -10 -7 2.57 0.26
 -2 -10 -7 2.57 0.24
 -2 10 7 2.27 0.35
 -2 10 7 2.39 0.31
 2 -10 7 2.78 0.49
 2 10 -7 3.11 0.61
 2 10 -7 2.82 0.49
 -2 -10 7 2.77 0.48
 -2 10 -7 2.83 0.5
 2 -10 -7 2.39 0.33
 -2 10 -7 2.63 0.55
 -3 -10 -7 6.68 0.52
 -3 -10 -7 5.94 0.45
 -3 10 7 6.09 0.69
 3 -10 7 7.22 0.79
 3 10 -7 6.71 0.87
 -3 10 7 5.63 0.51
 -3 10 -7 6.52 0.75
 3 -10 -7 6.33 0.56
 -3 10 -7 7.32 0.89
 -3 -10 7 6.56 0.77
 4 -10 7 5.61 0.73
 -4 10 7 5.43 0.76
 -4 10 7 7.07 0.74
 4 10 -7 8.12 1.03
 -4 -10 -7 5.99 0.55
 4 -10 -7 5.32 0.64
 -4 10 -7 7.11 0.93
 -4 -10 7 5.5 0.72
 4 -10 -7 8.4 0.72
 -4 10 -7 6.42 0.79
 -5 -10 -7 1.24 0.35
 5 10 -7 2.84 0.72
 5 -10 -7 -0.02 0.33
 -5 10 -7 2.58 0.62
 -5 10 -7 1.45 0.58
 -5 -10 7 1.67 0.47
 -6 -10 -7 0.63 0.36
 6 10 -7 -0.32 0.3
 6 -10 -7 -0.78 0.32
 -6 -10 7 0.3 0.38
 -6 10 -7 0.24 0.47
 0 11 -7 2.22 0.49
 0 11 -7 3.17 0.5
 0 11 -7 2.38 0.44
 -1 11 7 1.88 0.16
 1 11 -7 1.55 0.37
 1 11 -7 1.5 0.44
 -1 11 7 2.4 0.25
 -1 11 7 2.03 0.22
 -1 11 -7 2.29 0.49
 -1 11 -7 2.64 0.46
 1 -11 -7 1.71 0.23
 -1 -11 7 1.72 0.4
 -1 11 -7 1.8 0.4
 2 -11 7 4.25 0.6
 -2 -11 -7 3.51 0.27
 2 11 -7 3.88 0.66
 -2 -11 -7 4.09 0.27
 -2 11 7 4.13 0.39
 -2 11 7 4.23 0.36
 -2 11 -7 5.1 0.65
 -2 -11 7 4.93 0.64
 -2 11 -7 4.26 0.65
 2 -11 -7 4.1 0.43
 3 -11 7 -0.2 0.21
 -3 11 7 0.32 0.18
 -3 11 7 0.38 0.22
 -3 -11 -7 0.01 0.17
 -3 -11 -7 -0.03 0.14
 3 11 -7 0.2 0.33
 3 -11 -7 -0.11 0.16
 -3 11 -7 0.11 0.25
 -3 11 -7 0.56 0.32
 -3 -11 7 0.37 0.29
 4 11 -7 4.87 0.83
 -4 11 7 5.79 0.76
 -4 -11 -7 4.19 0.51
 -4 11 7 4.42 0.68
 4 -11 7 4.29 0.66
 -4 -11 7 3.79 0.66
 -4 11 -7 4.76 0.83
 -4 11 -7 4.4 0.69
 4 -11 -7 4.52 0.62
 -5 -11 -7 4.16 0.59
 5 11 -7 4.27 0.88
 -5 11 -7 4.35 0.88
 -5 -11 7 5.68 0.83
 6 11 -7 0.15 0.43
 -6 -11 -7 0.15 0.28
 -6 11 -7 0.12 0.42
 -6 -11 7 0.66 0.43
 0 12 -7 -0.07 0.26
 0 12 -7 0.13 0.2
 1 12 -7 7.76 0.89
 -1 12 7 7.48 0.4
 1 12 -7 7.63 0.71
 -1 12 7 7.65 0.38
 1 -12 -7 7.35 0.41
 -1 12 -7 6.75 0.81
 -1 -12 7 7.83 0.68
 -1 12 -7 7.13 0.67
 2 -12 7 0.39 0.28
 -2 12 7 0.32 0.16
 -2 -12 -7 0.36 0.11
 2 12 -7 0.22 0.31
 -2 -12 -7 -0.01 0.09
 -2 12 -7 0.42 0.32
 -2 12 -7 0.8 0.32
 -2 -12 7 0.32 0.28
 2 -12 -7 0.37 0.18
 3 12 -7 2.14 0.59
 -3 12 7 2.2 0.42
 3 -12 7 3.17 0.58
 -3 12 7 2.74 0.4
 -3 -12 -7 2.92 0.36
 -3 -12 -7 2.92 0.35
 -3 -12 7 2.5 0.53
 3 -12 -7 2.8 0.42
 -3 12 -7 2.71 0.6
 -3 12 -7 2.46 0.53
 -4 -12 -7 6.94 0.57
 4 12 -7 6.11 0.92
 -4 12 -7 6.99 0.96
 -4 12 -7 8.31 0.96
 -4 -12 7 7.09 0.86
 -5 -12 -7 3.3 0.5
 5 12 -7 2.84 0.75
 -5 12 -7 4.24 0.83
 -5 -12 7 5.25 0.84
 0 13 -7 25.93 1.31
 0 13 -7 25.27 1.41
 -1 13 7 1.85 0.22
 1 13 -7 1.85 0.4
 -1 13 7 1.88 0.22
 1 13 -7 1.79 0.5
 -1 13 -7 2.15 0.47
 1 -13 -7 1.94 0.25
 -1 13 -7 1.72 0.46
 -2 13 7 3.29 0.36
 2 -13 7 3.05 0.63
 2 13 -7 3.26 0.68
 -2 -13 -7 2.8 0.22
 -2 -13 -7 3.15 0.22
 -2 13 7 2.78 0.4
 2 -13 -7 3.13 0.38
 -2 13 -7 2.97 0.51
 -2 -13 7 3.43 0.58
 -2 13 -7 3.08 0.61
 -3 13 7 3.89 0.47
 -3 -13 -7 3.95 0.4
 -3 -13 -7 3.99 0.42
 3 13 -7 2.75 0.66
 3 -13 -7 4.77 0.54
 -3 -13 7 3.89 0.64
 -3 13 -7 3.81 0.73
 -3 13 -7 4.45 0.69
 4 13 -7 1.44 0.54
 -4 -13 -7 2.03 0.36
 -4 -13 7 2.45 0.57
 -4 13 -7 2.03 0.55
 5 13 -7 0.58 0.46
 -5 -13 -7 0.2 0.25
 -5 -13 7 0.96 0.46
 -5 13 -7 0.55 0.44
 0 14 -7 15.18 1
 0 14 -7 17.25 1.14
 -1 14 7 6.55 0.37
 -1 14 7 6.71 0.35
 1 14 -7 6.8 0.77
 1 14 -7 5.76 0.81
 1 -14 -7 7.03 0.42
 -1 14 -7 6.48 0.83
 -1 14 -7 5.52 0.68
 2 14 -7 4.33 0.73
 -2 14 7 4.57 0.48
 -2 14 7 4.4 0.5
 -2 -14 -7 4.29 0.25
 -2 14 7 4.05 0.35
 2 -14 -7 4.05 0.44
 -2 14 -7 4.74 0.77
 -2 -14 7 4.32 0.62
 -2 14 -7 5.75 0.76
 3 14 -7 4.03 0.76
 -3 14 7 4.75 0.61
 -3 -14 -7 4.82 0.4
 -3 14 -7 4.69 0.79
 3 -14 -7 4.92 0.55
 -3 -14 7 5.19 0.73
 -4 -14 -7 6.58 0.56
 4 14 -7 6.01 0.95
 -4 14 -7 7.3 1.03
 -4 -14 7 7.08 0.91
 5 14 -7 15.51 1.44
 -5 -14 -7 17.18 1.02
 -5 -14 7 18.66 1.32
 -5 14 -7 16.25 1.41
 0 15 -7 28.09 1.56
 -1 15 7 8.24 0.41
 1 15 -7 7.9 1
 -1 15 7 7.43 0.38
 1 -15 -7 8.12 0.48
 -1 15 -7 6.24 0.88
 2 15 -7 8.39 1.05
 -2 15 7 8.74 0.57
 -2 -15 7 7.47 0.86
 2 -15 -7 6.78 0.53
 -2 15 -7 7.84 0.99
 -3 -15 -7 3.64 0.38
 3 15 -7 3.9 0.82
 -3 15 7 4.13 0.57
 -3 -15 7 1.84 0.48
 3 -15 -7 3.18 0.47
 -3 15 -7 2.93 0.69
 -4 -15 -7 17.33 0.91
 4 15 -7 15.21 1.36
 -4 -15 7 19.34 1.28
 -4 15 -7 17.54 1.38
 0 16 -7 4.58 0.74
 1 16 -7 2.32 0.63
 -1 16 7 2.84 0.24
 -1 16 -7 2.91 0.64
 -2 16 7 10.16 0.63
 2 16 -7 10.5 1.21
 2 -16 -7 9.86 0.64
 -2 16 -7 9.71 1.13
 -2 -16 7 10.06 0.89
 -3 -16 -7 0.76 0.21
 -3 16 7 0.86 0.31
 3 16 -7 0.63 0.43
 -3 -16 7 0.85 0.37
 -3 16 -7 0.28 0.39
 4 16 -7 0.66 0.51
 -4 -16 -7 0.97 0.29
 -4 16 7 1.03 0.38
 -4 -16 7 1.22 0.45
 -4 16 -7 0.33 0.37
 0 17 -7 -0.27 0.3
 1 17 -7 1.31 0.54
 -1 17 -7 1.02 0.46
 2 17 -7 0.07 0.37
 -2 17 7 0.17 0.2
 -2 17 -7 0.3 0.36
 2 -17 -7 0.15 0.17
 -3 -17 -7 4.73 0.38
 3 17 -7 5.14 0.91
 -3 17 7 5.02 0.62
 -3 -17 7 4.3 0.75
 -3 17 -7 5.95 0.95
 0 18 -7 0.94 0.46
 1 18 -7 1.14 0.54
 -1 18 -7 0.24 0.41
 -2 18 7 2.2 0.36
 2 18 -7 2.64 0.69
 -2 18 -7 2.65 0.68
 0 19 -7 7.52 1.05
 1 19 -7 2.08 0.67
 -1 19 -7 2.99 0.75
 0 0 -8 638.5 16.8
 0 0 -8 663.07 16.71
 0 0 8 660.82 16.81
 -1 0 8 26.65 1.11
 -1 0 -8 28.36 1.05
 1 0 -8 26.52 1.14
 1 0 -8 27.29 1.07
 1 0 8 25.73 1.09
 -1 0 -8 28.02 1.1
 -2 0 -8 3.63 0.47
 -2 0 -8 2.91 0.36
 2 0 -8 4.21 0.57
 2 0 8 3.86 0.41
 -2 0 8 3.51 0.4
 -2 0 8 2.79 0.44
 2 0 -8 3.98 0.47
 -3 0 8 4.93 0.65
 3 0 -8 5.82 0.72
 -3 0 -8 4.22 0.49
 -3 0 8 4.6 0.56
 3 0 8 5.38 0.55
 3 0 -8 5.44 0.63
 -4 0 -8 26.95 1.33
 4 0 -8 29.22 1.57
 -4 0 8 27.84 1.36
 4 0 -8 29.58 1.42
 -4 0 8 29.25 1.54
 4 0 8 27.22 1.28
 5 0 -8 5.19 0.74
 -5 0 -8 6.39 0.77
 5 0 -8 5.72 0.88
 -5 0 8 6.46 0.78
 6 0 -8 21.14 1.58
 -6 0 -8 19.37 1.31
 -6 0 8 19.49 1.31
 7 0 -8 12.2 1.5
 -7 0 -8 10.39 1.18
 0 1 8 27.21 1.04
 0 1 -8 27.52 1.12
 0 -1 -8 26.61 0.99
 0 1 -8 27.1 1.05
 0 -1 -8 26.8 1.04
 0 -1 8 28.85 1.12
 -1 1 8 72.3 2.17
 1 1 -8 71.11 2.34
 -1 -1 -8 69.01 2.19
 1 -1 8 70.93 2.3
 -1 -1 -8 71.97 2.15
 1 1 -8 74.01 2.25
 -1 1 8 72.8 2.25
 -1 1 -8 69.95 2.28
 -1 -1 8 73.23 2.32
 -1 1 -8 71.62 2.22
 1 -1 -8 70.33 2.19
 1 -1 -8 73.05 2.3
 -1 -1 8 69.58 2.21
 1 1 8 74.22 2.23
 -2 -1 -8 52.22 1.81
 2 -1 8 51.32 1.74
 -2 -1 -8 51.8 1.72
 2 1 -8 57.63 1.87
 -2 1 8 55.23 1.9
 2 1 -8 48.18 1.91
 -2 1 -8 50.72 1.87
 -2 -1 8 50.86 1.8
 -2 -1 8 51.05 1.91
 -2 1 -8 49.72 1.76
 2 1 8 51.73 1.68
 2 -1 -8 51.66 1.79
 2 -1 -8 51.05 1.91
 3 1 -8 -0.15 0.19
 -3 -1 -8 0.35 0.21
 3 -1 8 0.49 0.22
 -3 1 8 0.19 0.2
 3 1 -8 0.1 0.29
 -3 1 8 -0.28 0.16
 -3 -1 8 0.43 0.27
 3 -1 -8 0.24 0.22
 -3 -1 8 0.22 0.27
 3 -1 -8 0.29 0.3
 -3 1 -8 0.45 0.26
 3 1 8 0.11 0.18
 -3 1 -8 0.03 0.2
 -4 1 8 40.05 1.72
 -4 -1 -8 40.92 1.69
 4 -1 8 43.87 1.69
 -4 1 8 44.35 1.93
 4 1 -8 39.84 1.93
 4 1 -8 40.23 1.77
 4 -1 -8 40.41 1.75
 -4 1 -8 42.36 1.76
 4 -1 -8 39.92 1.92
 -4 -1 8 43.71 1.79
 -4 -1 8 40.67 1.89
 -5 -1 -8 26.68 1.41
 5 1 -8 28.14 1.69
 -5 1 8 28.85 1.67
 5 1 -8 30.61 1.55
 -5 1 8 27.36 1.44
 -5 -1 8 26.5 1.43
 -5 1 -8 25.69 1.42
 5 -1 -8 24.78 1.58
 5 -1 -8 24.8 1.4
 6 1 -8 2.08 0.65
 -6 1 8 2.1 0.49
 -6 -1 -8 3.16 0.62
 -6 -1 8 1.97 0.52
 -6 1 -8 3.31 0.64
 6 -1 -8 1.96 0.63
 7 1 -8 0.74 0.55
 -7 -1 -8 0.28 0.42
 7 -1 -8 1.88 0.68
 -7 1 -8 1.11 0.53
 0 -2 -8 3.4 0.36
 0 -2 8 3.37 0.42
 0 2 -8 3.53 0.46
 0 -2 -8 3.39 0.3
 0 2 8 3.46 0.35
 0 2 -8 3.11 0.37
 -1 2 8 12.59 0.65
 -1 -2 -8 11.69 0.57
 1 2 -8 12.63 0.76
 -1 -2 -8 11.45 0.6
 -1 2 8 12.15 0.6
 1 2 -8 11.98 0.68
 1 -2 8 11.9 0.71
 -1 2 -8 11.76 0.7
 1 -2 -8 11.13 0.66
 1 2 8 12.65 0.62
 -1 -2 8 11.7 0.66
 -1 2 -8 12 0.66
 -1 -2 8 10.79 0.71
 1 -2 -8 12.05 0.61
 -2 2 8 14.67 0.82
 2 2 -8 13.9 0.89
 -2 2 8 14.01 0.73
 -2 -2 -8 14.67 0.71
 2 2 -8 12.18 0.76
 -2 -2 -8 14.43 0.76
 2 -2 8 15.14 0.77
 -2 2 -8 14.08 0.85
 -2 -2 8 15.09 0.9
 2 -2 -8 15.24 0.87
 -2 -2 8 14.03 0.79
 2 -2 -8 14.25 0.75
 -2 2 -8 14.14 0.78
 2 2 8 14.26 0.67
 -3 -2 -8 1.21 0.31
 -3 -2 -8 1.04 0.28
 3 2 -8 1.37 0.35
 3 2 -8 0.64 0.32
 3 -2 8 0.71 0.26
 -3 2 8 1.34 0.38
 -3 2 8 1.29 0.31
 -3 -2 8 1.34 0.35
 3 -2 -8 0.84 0.27
 -3 -2 8 0.99 0.35
 3 -2 -8 1.08 0.34
 3 2 8 1.02 0.26
 -3 2 -8 0.63 0.29
 -3 2 -8 1.01 0.34
 -4 2 8 1.02 0.42
 4 2 -8 0.63 0.44
 4 -2 8 0.72 0.29
 -4 2 8 0.45 0.26
 -4 -2 -8 0.91 0.33
 4 2 -8 1.01 0.38
 -4 -2 8 0.5 0.33
 4 -2 -8 0.69 0.33
 -4 2 -8 1.42 0.41
 -4 -2 8 0.84 0.38
 4 -2 -8 1.43 0.48
 5 2 -8 1.17 0.4
 5 2 -8 1.11 0.47
 -5 -2 -8 0.48 0.31
 -5 2 8 1.4 0.39
 -5 2 8 1.8 0.52
 -5 -2 8 1.5 0.46
 5 -2 -8 0.35 0.37
 -5 2 -8 0.87 0.36
 5 -2 -8 1.25 0.38
 -6 2 8 3.24 0.63
 6 2 -8 4.11 0.69
 -6 -2 -8 3.84 0.67
 6 2 -8 3.66 0.78
 -6 2 -8 4.67 0.77
 6 -2 -8 4.87 0.93
 -6 -2 8 4.28 0.74
 7 2 -8 2.16 0.72
 -7 -2 -8 1.17 0.51
 7 -2 -8 2.21 0.69
 -7 2 -8 1.26 0.58
 0 -3 -8 5.53 0.36
 0 3 -8 6.42 0.49
 0 3 8 6.38 0.39
 0 -3 8 5.93 0.51
 0 3 -8 5.52 0.5
 0 -3 -8 5.28 0.38
 1 3 -8 23.21 1.01
 -1 3 8 23.21 0.86
 1 -3 8 21.15 1.03
 -1 -3 -8 22.41 0.83
 -1 -3 -8 23 0.87
 1 3 -8 23.61 1.11
 -1 3 8 23.96 0.94
 -1 3 -8 22.27 1.06
 1 -3 -8 21.28 0.94
 -1 3 -8 21.59 0.98
 -1 -3 8 21.7 0.98
 -1 -3 8 23.31 1.08
 1 -3 -8 21.96 0.87
 -2 3 8 13.54 0.7
 -2 -3 -8 13.73 0.67
 2 3 -8 12.55 0.77
 -2 -3 -8 12.7 0.69
 2 -3 8 13.28 0.75
 -2 3 8 12.31 0.76
 2 3 -8 14.36 0.89
 2 -3 -8 13.32 0.72
 2 3 8 13.97 0.63
 -2 3 -8 12.88 0.82
 2 -3 -8 14.15 0.82
 -2 3 -8 13.93 0.79
 -2 -3 8 14.47 0.88
 -2 -3 8 12.98 0.78
 -3 3 8 1.54 0.39
 3 -3 8 1.39 0.31
 3 3 -8 1.87 0.49
 -3 -3 -8 2.08 0.36
 -3 -3 -8 1.65 0.35
 3 3 -8 1.83 0.4
 3 -3 -8 1.73 0.44
 -3 -3 8 1.55 0.36
 -3 3 -8 1.16 0.33
 3 -3 -8 2.21 0.39
 3 3 8 1.72 0.3
 -3 3 -8 1.53 0.38
 -3 -3 8 1.19 0.38
 -4 3 8 24.55 1.25
 -4 3 8 27.77 1.47
 4 -3 8 26.78 1.28
 -4 -3 -8 23.49 1.21
 4 3 -8 28.62 1.4
 4 3 -8 25.21 1.48
 4 -3 -8 26.03 1.3
 -4 -3 8 24.64 1.31
 -4 3 -8 25.91 1.33
 4 -3 -8 24.28 1.43
 -4 -3 8 27.72 1.49
 -5 3 8 3.12 0.58
 5 3 -8 1.79 0.55
 -5 -3 -8 1.98 0.45
 -5 3 8 3.39 0.64
 5 3 -8 3.23 0.61
 5 -3 -8 2.66 0.65
 5 -3 -8 1.87 0.49
 -5 -3 8 3.15 0.6
 -5 3 -8 1.59 0.47
 6 3 -8 2.23 0.71
 -6 -3 -8 2.29 0.54
 6 3 -8 2.97 0.64
 -6 -3 8 2.35 0.59
 6 -3 -8 2.54 0.68
 -6 3 -8 2.76 0.66
 7 3 -8 0.93 0.55
 -7 -3 -8 1.32 0.53
 -7 3 -8 0.68 0.52
 7 -3 -8 1.15 0.57
 0 -4 8 1.42 0.32
 0 -4 -8 1.24 0.21
 0 4 -8 1.31 0.32
 0 -4 -8 1.14 0.18
 0 4 -8 1.52 0.29
 1 -4 8 60.02 2.08
 -1 -4 -8 57.16 1.74
 1 4 -8 55.22 2.07
 -1 4 8 58.64 1.83
 1 4 -8 58.78 1.98
 -1 4 8 60.44 1.76
 -1 -4 -8 57.57 1.7
 1 -4 -8 57.98 1.79
 1 -4 -8 59.75 1.89
 -1 -4 8 58.87 2.06
 -1 -4 8 56.44 1.96
 -1 4 -8 57.27 1.97
 -1 4 -8 60.71 2.08
 -2 -4 -8 27.83 1.04
 -2 4 8 28.62 1.11
 2 4 -8 27.72 1.36
 -2 -4 -8 28.27 1.09
 2 4 -8 28.17 1.26
 -2 4 8 30.29 1.22
 2 -4 8 28.09 1.21
 2 -4 -8 28.21 1.14
 -2 -4 8 31.76 1.37
 -2 -4 8 27.12 1.22
 2 -4 -8 27.41 1.23
 -2 4 -8 29.58 1.25
 -2 4 -8 28.52 1.33
 2 4 8 28.96 1
 3 4 -8 15.46 0.94
 -3 -4 -8 14.39 0.77
 -3 -4 -8 16.6 0.87
 3 4 -8 14.24 1.02
 3 -4 8 13.71 0.85
 -3 4 8 13.6 0.8
 -3 4 8 15.72 0.95
 -3 -4 8 14.25 0.98
 -3 4 -8 12.84 0.94
 -3 -4 8 15 0.91
 3 -4 -8 15.08 0.86
 3 4 8 15.12 0.73
 -3 4 -8 14.41 0.9
 3 -4 -8 14.14 0.95
 -4 4 8 19.04 1.19
 -4 4 8 16.47 0.98
 4 -4 8 18.89 1.06
 -4 -4 -8 16.56 0.97
 4 4 -8 17.38 1.23
 4 4 -8 20.47 1.18
 4 -4 -8 17.78 1.06
 -4 4 -8 18.09 1.19
 -4 -4 8 16.73 1.08
 4 -4 -8 19.02 1.22
 -4 4 -8 18.71 1.11
 -5 -4 -8 9 0.79
 -5 4 8 9.62 1.12
 5 4 -8 7.81 0.88
 5 4 -8 9.43 1.14
 -5 4 8 9.25 0.81
 -5 -4 8 9.02 0.97
 -5 4 -8 9.82 1.02
 5 -4 -8 9.75 0.86
 5 -4 -8 8.65 1.07
 6 4 -8 0.51 0.48
 6 4 -8 0.34 0.37
 -6 -4 -8 0.47 0.37
 -6 4 -8 0.3 0.37
 6 -4 -8 0.52 0.43
 -6 -4 8 1 0.41
 7 4 -8 5.77 1.08
 -7 -4 -8 5.62 0.9
 -7 4 -8 5.38 0.89
 7 -4 -8 5.75 0.99
 0 -5 8 0.18 0.2
 0 5 -8 0.39 0.25
 0 5 -8 0.21 0.21
 0 5 8 0.21 0.11
 0 -5 -8 0.09 0.12
 0 5 -8 0.16 0.19
 0 -5 -8 0.02 0.09
 -1 5 8 8.32 0.47
 -1 5 8 7.86 0.42
 1 -5 8 7.82 0.65
 -1 -5 -8 7.88 0.4
 -1 -5 -8 7.67 0.38
 1 5 -8 6.98 0.65
 1 5 -8 7.58 0.59
 1 -5 -8 7.62 0.45
 1 -5 -8 7.99 0.5
 -1 5 -8 6.85 0.62
 -1 -5 8 7.83 0.57
 -1 -5 8 8.52 0.65
 -1 5 -8 7.22 0.57
 2 5 -8 13.73 0.84
 -2 5 8 12.98 0.67
 -2 -5 -8 12.59 0.63
 -2 5 8 13.04 0.75
 2 5 -8 12.25 0.87
 2 -5 8 13.87 0.81
 -2 -5 -8 12.45 0.6
 -2 -5 -8 13.8 0.65
 2 5 8 12.82 0.56
 2 -5 -8 12.65 0.77
 -2 5 -8 12.94 0.86
 2 -5 -8 13.53 0.7
 -2 -5 8 12.75 0.81
 -2 -5 8 14.11 0.89
 -2 5 -8 14.35 0.84
 3 5 -8 16.58 0.99
 3 5 -8 15.89 1.1
 -3 5 8 15.77 0.85
 -3 -5 -8 16.55 0.82
 -3 -5 -8 16.18 0.87
 3 -5 8 15.8 0.92
 -3 5 8 17.11 1
 3 -5 -8 14.78 0.86
 -3 5 -8 18.15 1.02
 3 -5 -8 15.19 0.98
 -3 -5 8 16.55 1.08
 -3 5 -8 17.22 1.08
 -3 -5 8 16.52 0.97
 -4 5 8 0.61 0.25
 4 -5 8 0.45 0.32
 4 5 -8 0.81 0.35
 -4 5 8 1.16 0.4
 -4 -5 -8 0.61 0.28
 4 5 -8 0.04 0.33
 -4 5 -8 0.1 0.29
 4 -5 -8 0.97 0.43
 4 -5 -8 0.75 0.32
 -4 -5 8 0.85 0.36
 -4 5 -8 0.81 0.4
 -5 5 8 4.99 0.7
 -5 -5 -8 4.84 0.65
 5 5 -8 5.72 0.76
 -5 5 8 5.02 0.81
 5 -5 8 5.89 0.73
 5 5 -8 5.16 0.88
 5 -5 -8 4.58 0.65
 5 -5 -8 6.52 0.89
 -5 -5 8 4.23 0.69
 -5 5 -8 4.29 0.68
 6 5 -8 3.03 0.78
 -6 -5 -8 3.12 0.63
 6 -5 -8 4.96 0.87
 -6 -5 8 3.92 0.7
 -6 5 -8 3.25 0.71
 -7 -5 -8 7.04 0.97
 7 5 -8 5.69 1.11
 -7 5 -8 5.25 0.93
 7 -5 -8 5.48 0.98
 -7 -5 8 4.35 0.83
 0 6 -8 39.14 1.59
 0 -6 -8 39.52 1.17
 0 -6 -8 41.8 1.22
 0 6 8 39.86 1.15
 0 6 -8 40.15 1.54
 0 6 -8 41.99 1.65
 0 -6 8 40.47 1.62
 1 6 -8 47.25 1.89
 -1 -6 -8 48.89 1.42
 1 6 -8 50.04 1.81
 -1 -6 -8 48.52 1.41
 1 -6 8 51.5 1.93
 -1 6 8 51.02 1.48
 -1 6 -8 50.04 1.79
 -1 6 -8 49.2 1.9
 1 -6 -8 48.58 1.6
 -1 6 -8 47.41 1.79
 -1 -6 8 47.91 1.78
 1 -6 -8 49.76 1.53
 -1 -6 8 51.36 1.91
 2 -6 8 6.74 0.58
 2 6 -8 7.06 0.62
 -2 6 8 6.64 0.46
 -2 -6 -8 6.65 0.41
 -2 -6 -8 7.25 0.46
 2 6 -8 6.64 0.77
 -2 6 8 7.49 0.55
 2 -6 -8 6.23 0.55
 2 -6 -8 7.24 0.51
 -2 -6 8 5.67 0.61
 -2 6 -8 7.45 0.69
 2 6 8 6.52 0.36
 -2 6 -8 7.23 0.61
 -2 -6 8 7.64 0.68
 -3 -6 -8 9.36 0.59
 3 -6 8 10.27 0.75
 -3 6 8 10.73 0.67
 3 6 -8 9.93 0.79
 3 6 -8 9.15 0.87
 -3 6 8 9.17 0.73
 -3 -6 -8 9.81 0.67
 -3 6 -8 10.49 0.86
 -3 -6 8 8.91 0.75
 -3 6 -8 10.45 0.8
 3 -6 -8 9.96 0.7
 -3 -6 8 11.28 0.91
 3 -6 -8 9.61 0.77
 -4 6 8 4.56 0.68
 -4 6 8 5.06 0.59
 4 -6 8 4.79 0.67
 4 6 -8 5.12 0.82
 4 6 -8 6.97 0.84
 -4 -6 -8 4.65 0.56
 4 -6 -8 4.79 0.62
 -4 6 -8 6.31 0.8
 -4 6 -8 5.32 0.82
 4 -6 -8 4.68 0.69
 -4 -6 8 5.08 0.66
 -5 -6 -8 1.81 0.42
 5 -6 8 1.09 0.37
 5 6 -8 1.58 0.47
 -5 6 8 1.64 0.53
 -5 6 8 0.34 0.21
 5 6 -8 1.41 0.56
 5 -6 -8 1.73 0.45
 -5 -6 8 0.88 0.44
 -5 6 -8 0.75 0.42
 5 -6 -8 0.59 0.42
 -5 6 -8 0.05 0.31
 -6 -6 -8 3.49 0.62
 6 6 -8 2.15 0.71
 -6 -6 8 3.37 0.68
 6 -6 -8 3.78 0.72
 -6 6 -8 3.3 0.7
 -7 -6 -8 1.38 0.5
 7 6 -8 1.47 0.65
 7 -6 -8 2.35 0.66
 -7 -6 8 1.28 0.56
 -7 6 -8 0.95 0.53
 0 -7 -8 36.62 1.06
 0 -7 8 36.42 1.55
 0 -7 -8 35.53 1.04
 0 7 -8 38.45 1.52
 0 7 -8 36 1.55
 1 7 -8 1.19 0.31
 -1 -7 -8 1.1 0.13
 1 7 -8 1.04 0.33
 -1 7 8 0.7 0.15
 -1 -7 -8 1.03 0.12
 -1 -7 -8 1.29 0.14
 -1 7 8 1.37 0.21
 1 -7 8 1.04 0.34
 -1 7 -8 1.67 0.38
 -1 7 -8 0.96 0.33
 -1 -7 8 0.85 0.28
 -1 -7 8 0.87 0.31
 -1 7 -8 1.86 0.37
 1 -7 -8 0.96 0.19
 1 -7 -8 1.15 0.22
 -2 7 8 3.37 0.36
 2 7 -8 3.15 0.55
 -2 -7 -8 3.76 0.3
 -2 -7 -8 3.54 0.36
 -2 7 8 2.86 0.4
 2 7 -8 3.75 0.55
 2 -7 8 2.51 0.42
 -2 -7 8 3.84 0.61
 -2 7 -8 3.78 0.56
 -2 -7 8 3.72 0.53
 -2 7 -8 3.62 0.52
 2 7 8 2.9 0.23
 2 -7 -8 2.74 0.41
 2 -7 -8 3.11 0.38
 -3 -7 -8 -0.05 0.15
 3 7 -8 0.53 0.3
 3 7 -8 0.5 0.31
 -3 -7 -8 0.06 0.19
 3 -7 8 0.95 0.33
 -3 7 8 0.12 0.18
 -3 7 8 0.07 0.23
 -3 7 -8 0.06 0.26
 -3 -7 8 0.08 0.25
 -3 7 -8 0.13 0.26
 3 -7 -8 0.26 0.21
 3 -7 -8 -0.3 0.2
 -4 7 8 15.48 0.93
 4 -7 8 16.06 1.03
 4 7 -8 16.33 1.08
 4 7 -8 15.49 1.19
 -4 7 8 14.37 1.03
 -4 -7 -8 15.39 0.87
 4 -7 -8 16.82 1.09
 4 -7 -8 14.19 0.94
 -4 7 -8 13.89 1.12
 -4 -7 8 15.47 1.05
 -4 7 -8 15.33 1.04
 -5 -7 -8 1.97 0.44
 -5 7 8 2.27 0.58
 5 7 -8 2.54 0.64
 5 -7 8 2.31 0.53
 -5 7 -8 3.12 0.64
 -5 -7 8 2.74 0.57
 5 -7 -8 1.72 0.49
 -5 7 -8 3.09 0.69
 -6 -7 -8 0.58 0.35
 6 7 -8 0.8 0.57
 -6 -7 8 0.06 0.35
 -6 7 -8 0.24 0.34
 6 -7 -8 0.43 0.44
 0 8 -8 4.66 0.58
 0 8 -8 3.53 0.55
 0 8 -8 3.75 0.53
 0 -8 8 3.84 0.56
 -1 8 8 18.11 0.62
 1 8 -8 15.37 1.02
 -1 8 8 17.91 0.69
 1 -8 8 18.23 1.07
 1 8 -8 18.84 1
 -1 8 -8 18.42 1.08
 -1 -8 8 17.49 0.96
 -1 8 -8 16.78 0.95
 1 -8 -8 17.92 0.72
 1 -8 -8 17.58 0.69
 -1 -8 8 18.61 1.05
 -1 8 -8 17.82 0.98
 -2 8 8 9.1 0.6
 -2 8 8 9.22 0.53
 -2 -8 -8 8.66 0.44
 2 8 -8 9.58 0.82
 2 8 -8 9.55 0.74
 2 -8 8 8.71 0.71
 -2 -8 -8 9.71 0.5
 2 -8 -8 9.2 0.57
 2 8 8 8.83 0.35
 -2 8 -8 8.98 0.8
 -2 8 -8 9.25 0.73
 -2 -8 8 9.26 0.79
 -2 -8 8 8.78 0.72
 2 -8 -8 8.06 0.58
 3 -8 8 22.25 1.19
 3 8 -8 22.54 1.23
 -3 8 8 21.13 1.12
 3 8 -8 23.95 1.38
 -3 -8 -8 21.58 0.93
 -3 8 8 22.27 1.02
 -3 -8 -8 22.45 1.02
 -3 8 -8 23.19 1.24
 3 -8 -8 21.35 1.05
 -3 -8 8 22.6 1.22
 -3 8 -8 21.16 1.3
 3 -8 -8 21.33 1.12
 4 -8 8 1.04 0.37
 -4 8 8 0.43 0.32
 4 8 -8 0.38 0.33
 -4 8 8 0.66 0.28
 -4 -8 -8 0.74 0.27
 4 8 -8 0.79 0.43
 4 -8 -8 1.43 0.41
 -4 8 -8 0.84 0.35
 4 -8 -8 0.92 0.32
 -4 -8 8 0.7 0.36
 -4 8 -8 0.73 0.44
 -5 8 8 6.42 0.89
 5 8 -8 7.01 1.05
 5 -8 8 7.48 0.84
 -5 -8 -8 6.29 0.7
 -5 8 -8 7.55 1
 -5 -8 8 8.39 0.99
 5 -8 -8 5.62 0.81
 -5 8 -8 6.76 0.87
 -6 -8 -8 7.67 0.89
 6 8 -8 7.85 1.2
 -6 8 -8 6.66 0.93
 6 -8 -8 9.58 1.15
 -6 -8 8 7.65 1.03
 -6 8 -8 5.06 0.89
 0 9 -8 3.45 0.49
 0 9 -8 2.31 0.41
 0 -9 8 2.31 0.44
 0 9 -8 2.47 0.49
 -1 9 8 1.7 0.17
 -1 9 8 1.48 0.2
 1 9 -8 1.61 0.37
 1 9 -8 1.37 0.41
 1 -9 8 1.25 0.4
 -1 9 -8 1.49 0.4
 1 -9 -8 1.61 0.22
 -1 9 -8 2.38 0.43
 -1 9 -8 2.18 0.42
 -1 -9 8 1.8 0.42
 -1 -9 8 1.11 0.31
 -2 9 8 0.16 0.12
 -2 -9 -8 0.03 0.11
 2 9 -8 0.23 0.34
 2 9 -8 -0.19 0.2
 -2 9 8 0.04 0.15
 -2 -9 -8 0.22 0.12
 2 -9 8 -0.12 0.17
 -2 9 -8 0.21 0.24
 2 -9 -8 -0.06 0.14
 2 -9 -8 0.17 0.17
 -2 9 -8 -0.22 0.19
 -2 -9 8 -0.05 0.22
 3 9 -8 4.11 0.69
 3 9 -8 6.27 0.72
 -3 9 8 5.31 0.48
 -3 -9 -8 4.36 0.4
 -3 -9 -8 5.4 0.47
 3 -9 8 4.53 0.61
 -3 9 8 4.38 0.58
 3 -9 -8 5.06 0.59
 -3 9 -8 5.59 0.74
 3 -9 -8 4.98 0.56
 -3 9 -8 4.33 0.69
 -3 -9 8 5.08 0.68
 -4 9 8 8.98 0.8
 4 9 -8 9.12 1.08
 4 -9 8 9.35 0.81
 -4 9 8 7.91 0.67
 -4 -9 -8 8.46 0.63
 -4 -9 8 9.32 0.85
 4 -9 -8 9.15 0.79
 -4 9 -8 8.76 1.08
 4 -9 -8 7.61 0.69
 -4 9 -8 9.52 0.86
 5 9 -8 1.88 0.66
 -5 -9 -8 1.52 0.39
 -5 9 -8 1.25 0.52
 -5 -9 8 1.28 0.43
 5 -9 -8 0.9 0.39
 -5 9 -8 1.25 0.47
 -6 -9 -8 1.11 0.42
 6 9 -8 1.3 0.63
 -6 -9 8 0.62 0.42
 6 -9 -8 1.56 0.51
 -6 9 -8 1.95 0.62
 0 10 -8 11.13 0.81
 0 10 -8 12.02 0.82
 0 10 -8 11 0.85
 1 10 -8 4.59 0.64
 -1 10 8 5.88 0.25
 1 10 -8 5.81 0.68
 -1 10 8 5.36 0.31
 -1 10 -8 5.84 0.65
 -1 10 -8 5.87 0.76
 -1 -10 8 5.81 0.67
 1 -10 -8 5.34 0.33
 -1 10 -8 5.79 0.67
 -2 10 8 23.09 1.04
 2 10 -8 24.53 1.4
 2 -10 8 26.76 1.35
 2 10 -8 27.06 1.34
 -2 10 8 27.04 0.99
 -2 -10 -8 27.31 0.86
 -2 -10 -8 26.15 0.85
 2 -10 -8 25.69 1.04
 -2 10 -8 24.75 1.3
 -2 10 -8 26.71 1.44
 -2 -10 8 26.24 1.31
 -3 10 8 1.64 0.38
 3 10 -8 0.83 0.39
 3 -10 8 1.62 0.43
 -3 10 8 1.41 0.28
 -3 -10 -8 0.83 0.22
 -3 -10 -8 1.52 0.29
 -3 10 -8 0.79 0.36
 3 -10 -8 1.5 0.34
 3 -10 -8 1.4 0.33
 -3 10 -8 1.07 0.41
 -3 -10 8 0.88 0.32
 4 10 -8 5.06 0.85
 4 -10 8 5.26 0.76
 -4 -10 -8 4.65 0.53
 -4 10 8 5.85 0.73
 -4 10 8 5.54 0.64
 4 -10 -8 6.34 0.72
 -4 10 -8 5.37 0.78
 4 -10 -8 5.86 0.68
 -4 -10 8 4.9 0.71
 -4 10 -8 5.69 0.88
 5 10 -8 0.44 0.4
 -5 -10 -8 0.01 0.25
 -5 -10 8 0.78 0.41
 5 -10 -8 0.64 0.35
 -5 10 -8 0.12 0.34
 -5 10 -8 0.37 0.32
 6 10 -8 1.12 0.58
 -6 -10 -8 1.27 0.45
 -6 10 -8 1.03 0.56
 -6 -10 8 1.63 0.56
 0 11 -8 3.79 0.57
 0 11 -8 2.39 0.46
 0 11 -8 3.79 0.63
 1 11 -8 3.88 0.66
 -1 11 8 3.69 0.24
 1 11 -8 5.64 0.69
 -1 11 8 3.75 0.25
 -1 11 -8 4.58 0.61
 -1 11 -8 3.14 0.52
 -1 11 -8 3.73 0.62
 -1 -11 8 2.65 0.47
 1 -11 -8 4.14 0.29
 -2 -11 -8 0.94 0.14
 2 11 -8 1.32 0.46
 2 -11 8 0.84 0.31
 -2 11 8 1.32 0.23
 2 -11 -8 1.1 0.24
 -2 11 -8 1.41 0.42
 -2 -11 8 0.87 0.34
 -2 11 -8 0.76 0.33
 3 11 -8 0.55 0.38
 -3 -11 -8 0.97 0.23
 -3 11 8 0.89 0.25
 3 -11 8 1.36 0.41
 -3 11 8 0.77 0.3
 -3 -11 -8 0.92 0.26
 -3 11 -8 1.02 0.36
 -3 -11 8 0.65 0.34
 -3 11 -8 1.03 0.41
 3 -11 -8 0.8 0.27
 4 11 -8 1.5 0.54
 -4 -11 -8 0.97 0.28
 4 -11 -8 1.51 0.38
 -4 -11 8 1.88 0.48
 -4 11 -8 0.5 0.33
 -4 11 -8 1.02 0.49
 -5 -11 -8 0.75 0.32
 5 11 -8 0.24 0.42
 -5 -11 8 0.34 0.37
 -5 11 -8 0.67 0.48
 6 11 -8 1.28 0.64
 -6 -11 -8 2.11 0.49
 -6 -11 8 1.84 0.64
 -6 11 -8 2.37 0.77
 0 12 -8 17.44 1.05
 0 12 -8 17.29 1.15
 1 12 -8 3.13 0.61
 1 12 -8 3.2 0.56
 -1 12 -8 2.73 0.5
 -1 12 -8 3.31 0.59
 1 -12 -8 3.23 0.27
 -1 -12 8 3.25 0.54
 -2 12 8 9.09 0.59
 -2 -12 -8 9.88 0.39
 -2 12 8 10.67 0.54
 2 12 -8 10.6 1.14
 2 -12 8 7.33 0.85
 -2 -12 8 9.82 0.82
 2 -12 -8 10.27 0.6
 -2 12 -8 8.46 0.78
 -2 12 -8 10.38 0.93
 -3 12 8 7.79 0.65
 -3 -12 -8 7.67 0.51
 3 12 -8 5.34 0.85
 3 -12 8 8.62 0.78
 -3 -12 -8 6.99 0.47
 -3 12 8 7.37 0.56
 -3 12 -8 7.69 0.98
 -3 -12 8 8.05 0.9
 3 -12 -8 7.96 0.61
 -3 12 -8 7.76 0.88
 4 12 -8 8.36 1.06
 -4 -12 -8 8.75 0.63
 -4 12 -8 8.86 1.11
 -4 12 -8 8.19 1.07
 -4 -12 8 10.17 0.92
 -5 -12 -8 4.04 0.57
 5 12 -8 4.43 0.92
 -5 -12 8 2.72 0.6
 -5 12 -8 3.53 0.8
 0 13 -8 9.93 0.81
 0 13 -8 10.11 1.08
 1 13 -8 1.41 0.46
 1 13 -8 1.08 0.34
 -1 13 -8 1.39 0.38
 1 -13 -8 1.97 0.24
 -1 13 -8 0.85 0.39
 -2 13 8 26.31 0.96
 -2 13 8 25.77 1.05
 2 13 -8 23.04 1.45
 -2 13 8 24.05 1.05
 -2 13 -8 27.65 1.55
 2 -13 -8 26.18 1.05
 -2 -13 8 25.12 1.36
 -2 13 -8 26.67 1.41
 -3 13 8 0.93 0.22
 -3 -13 -8 0.38 0.18
 -3 -13 -8 0.07 0.16
 3 13 -8 -0.25 0.26
 -3 -13 8 0.21 0.29
 -3 13 -8 0.12 0.26
 -3 13 -8 0.46 0.39
 3 -13 -8 0.45 0.23
 4 13 -8 2.91 0.75
 -4 -13 -8 3.31 0.44
 -4 13 -8 2.3 0.64
 -4 -13 8 2.66 0.58
 -5 -13 -8 1.41 0.36
 5 13 -8 0.87 0.57
 -5 13 -8 0.95 0.56
 -5 -13 8 0.61 0.4
 0 14 -8 3.93 0.62
 0 14 -8 5.16 0.8
 1 14 -8 2.17 0.46
 1 14 -8 2.34 0.59
 -1 14 -8 1.4 0.47
 1 -14 -8 1.97 0.24
 -1 14 -8 1.57 0.43
 -2 14 8 8.81 0.56
 2 14 -8 7.93 1.02
 -2 14 -8 9.71 1.08
 2 -14 -8 8.29 0.55
 -2 14 -8 8.44 1.05
 -2 -14 8 7.93 0.88
 3 14 -8 13.3 1.18
 -3 -14 -8 14.28 0.67
 -3 -14 -8 15.77 0.68
 -3 14 -8 12.84 1.14
 3 -14 -8 14.75 0.85
 -3 -14 8 14.96 1.09
 4 14 -8 0.54 0.45
 -4 -14 -8 0.62 0.23
 -4 -14 8 0.39 0.35
 -4 14 -8 0.62 0.4
 5 14 -8 1.97 0.73
 -5 -14 -8 1.65 0.42
 -5 14 -8 1.58 0.61
 -5 -14 8 3.11 0.69
 0 15 -8 -0.28 0.24
 1 15 -8 2.37 0.61
 1 -15 -8 2.5 0.28
 -1 15 -8 2.63 0.61
 2 15 -8 5.72 0.89
 -2 15 8 6.14 0.47
 2 -15 -8 6.08 0.49
 -2 15 -8 6.08 0.87
 -2 -15 8 5.06 0.72
 3 15 -8 5.34 0.91
 -3 -15 -8 3.96 0.34
 -3 15 8 4.97 0.59
 -3 15 -8 4.48 0.83
 -3 -15 8 4.54 0.72
 4 15 -8 2.96 0.76
 -4 -15 -8 3.57 0.45
 -4 15 -8 2.56 0.68
 -4 -15 8 2.32 0.6
 0 16 -8 12.79 1.1
 1 16 -8 11.43 1.07
 -1 16 -8 12.38 1.06
 2 16 -8 1.6 0.55
 -2 16 8 1.98 0.31
 2 -16 -8 2.19 0.33
 -2 16 -8 1.35 0.55
 -2 -16 8 1.19 0.42
 3 16 -8 2.26 0.65
 -3 -16 -8 1.54 0.23
 -3 16 8 1.45 0.38
 -3 -16 8 1.91 0.55
 -3 16 -8 2.8 0.69
 -4 -16 -8 1.84 0.35
 4 16 -8 1.52 0.56
 -4 16 8 2.56 0.55
 -4 -16 8 1.9 0.54
 -4 16 -8 1.76 0.56
 0 17 -8 -0.02 0.31
 1 17 -8 5.2 0.89
 -1 17 -8 6.63 0.94
 -2 17 8 2.77 0.36
 2 17 -8 1.21 0.54
 -2 17 -8 1.97 0.59
 2 -17 -8 2.2 0.36
 3 17 -8 0.16 0.43
 -3 17 8 0.74 0.28
 -3 -17 8 0.35 0.35
 -3 17 -8 0.96 0.5
 0 18 -8 11.7 1.1
 1 18 -8 0.96 0.49
 -1 18 -8 1.13 0.47
 2 18 -8 4.27 0.83
 2 -18 -8 4.58 0.56
 -2 18 -8 5.5 0.94
 0 19 -8 1.41 0.53
 0 0 9 0.15 0.17
 0 0 -9 0.17 0.15
 0 0 -9 0.09 0.17
 -1 0 -9 48.22 1.66
 1 0 -9 50.91 1.71
 1 0 9 51.18 1.76
 -1 0 9 50.17 1.76
 -1 0 -9 50.78 1.74
 1 0 -9 47.51 1.78
 -2 0 -9 50.16 1.85
 -2 0 -9 50.55 1.77
 -2 0 9 51.03 1.91
 2 0 9 50.75 1.73
 -2 0 9 53.05 1.81
 2 0 -9 51.72 1.83
 2 0 -9 51.41 1.96
 3 0 -9 2.69 0.44
 -3 0 9 2.39 0.41
 -3 0 -9 2.82 0.44
 3 0 -9 3.11 0.56
 -3 0 -9 1.7 0.39
 -3 0 9 2.29 0.47
 3 0 9 3.17 0.41
 4 0 -9 11.53 0.89
 -4 0 -9 12.62 0.89
 -4 0 9 10.97 0.96
 -4 0 9 12.49 0.89
 4 0 -9 12.03 1.02
 -5 0 -9 21.72 1.3
 -5 0 9 24.46 1.35
 5 0 -9 21.73 1.49
 5 0 -9 24.65 1.4
 -6 0 9 1.3 0.42
 -6 0 -9 1.4 0.47
 6 0 -9 0.98 0.51
 -7 0 -9 7.57 1.05
 7 0 -9 6.54 1.15
 0 -1 9 42.77 1.55
 0 -1 -9 42.98 1.42
 0 1 9 41.36 1.46
 0 1 -9 42.6 1.48
 0 1 -9 42.44 1.56
 0 -1 -9 40.53 1.47
 1 1 -9 6.81 0.57
 1 1 -9 6.98 0.53
 1 -1 9 6.92 0.56
 -1 1 9 6.98 0.53
 -1 1 9 7.24 0.49
 -1 -1 -9 6.99 0.5
 -1 -1 -9 6.97 0.47
 1 -1 -9 6.87 0.55
 -1 -1 9 7 0.55
 -1 1 -9 6.22 0.49
 1 1 9 7.18 0.51
 1 -1 -9 7.12 0.5
 -1 -1 9 7.11 0.51
 -1 1 -9 7.22 0.56
 -2 -1 -9 0.66 0.23
 2 -1 9 0.5 0.21
 -2 1 9 0.98 0.31
 2 1 -9 0.7 0.31
 -2 -1 -9 0.42 0.24
 2 1 -9 0.53 0.23
 2 1 9 0.74 0.2
 2 -1 -9 0.92 0.33
 -2 1 -9 1.11 0.32
 -2 1 -9 0.62 0.24
 -2 -1 9 0.59 0.24
 2 -1 -9 0.55 0.22
 -2 -1 9 0.93 0.31
 -3 1 9 60.27 2.25
 3 1 -9 60.74 2.16
 3 1 -9 59.73 2.34
 -3 -1 -9 56.75 2.11
 -3 -1 -9 58.27 2.04
 3 -1 9 58.96 2.03
 -3 1 9 58 2.08
 -3 -1 9 54.7 2.08
 3 -1 -9 58.87 2.29
 -3 1 -9 56.96 2.09
 3 -1 -9 56.84 2.11
 -3 -1 9 57.48 2.24
 -3 1 -9 60.27 2.21
 3 1 9 59.65 1.98
 -4 1 9 44.89 1.83
 -4 1 9 46.8 2.03
 -4 -1 -9 43.41 1.79
 4 1 -9 47.15 1.92
 4 1 -9 43.95 2.07
 -4 1 -9 46.28 1.85
 4 -1 -9 44.21 1.86
 -4 -1 9 40.59 1.8
 4 -1 -9 38.94 1.95
 -4 -1 9 42.62 1.99
 5 1 -9 1.69 0.47
 5 1 -9 1.67 0.57
 -5 1 9 0.9 0.4
 -5 -1 -9 0.68 0.36
 -5 -1 9 0.44 0.31
 5 -1 -9 0.57 0.34
 5 -1 -9 0.92 0.46
 -5 1 -9 0.71 0.37
 -6 -1 -9 6.76 0.9
 6 1 -9 5.85 0.98
 -6 1 -9 7.23 0.95
 -6 -1 9 7.41 0.95
 6 -1 -9 6.99 1.09
 -7 -1 -9 1.81 0.58
 7 1 -9 2.23 0.72
 -7 1 -9 3.01 0.7
 7 -1 -9 2.15 0.74
 0 2 9 0.46 0.19
 0 2 -9 0.74 0.23
 0 -2 9 0.86 0.26
 0 -2 -9 1.06 0.22
 0 2 -9 0.94 0.27
 0 -2 -9 0.77 0.21
 -1 2 9 5.74 0.46
 1 2 -9 4.91 0.47
 -1 -2 -9 5.53 0.44
 -1 2 9 5.15 0.4
 -1 -2 -9 5.39 0.4
 1 2 -9 6.34 0.65
 1 -2 9 5.67 0.51
 1 -2 -9 4.47 0.41
 -1 -2 9 5.75 0.6
 -1 -2 9 5.13 0.46
 1 2 9 5.01 0.43
 1 -2 -9 5.75 0.51
 -1 2 -9 5.73 0.51
 -1 2 -9 5.54 0.48
 -2 -2 -9 3.25 0.43
 2 2 -9 2.57 0.47
 -2 2 9 3.29 0.46
 -2 -2 -9 2.61 0.36
 2 2 -9 3.04 0.42
 -2 2 9 2.26 0.35
 2 -2 9 2.89 0.4
 2 -2 -9 3.23 0.49
 -2 -2 9 2.65 0.47
 -2 2 -9 3.71 0.5
 2 -2 -9 2.91 0.41
 -2 2 -9 3.78 0.48
 -2 -2 9 3.66 0.48
 2 2 9 2.81 0.33
 3 2 -9 7.34 0.86
 -3 2 9 8.43 0.74
 -3 -2 -9 8.15 0.62
 3 2 -9 8.06 0.69
 -3 -2 -9 8.43 0.66
 -3 -2 -9 7.81 0.6
 3 -2 9 8.31 0.64
 3 -2 -9 9.61 0.7
 3 -2 -9 8.51 0.77
 -3 -2 9 8.83 0.7
 -3 2 -9 8.77 0.74
 -3 2 -9 9.25 0.7
 -3 -2 9 9.41 0.8
 3 2 9 8.49 0.57
 -4 2 9 14 0.92
 -4 -2 -9 12.95 0.88
 -4 2 9 13.5 1.04
 4 -2 9 13.43 0.88
 4 2 -9 13.73 1.11
 4 2 -9 16.93 1.06
 -4 -2 9 14.86 0.96
 -4 -2 9 15.77 1.13
 4 -2 -9 14.03 1.07
 4 -2 -9 12.72 0.92
 -4 2 -9 14.17 0.96
 -4 2 -9 12.98 1.01
 -5 2 9 0.91 0.44
 -5 2 9 0.96 0.36
 5 2 -9 0.17 0.41
 5 2 -9 1.28 0.46
 -5 -2 -9 0.63 0.35
 5 -2 -9 0.37 0.29
 -5 -2 9 1.6 0.47
 -5 2 -9 1.93 0.5
 5 -2 -9 1.3 0.52
 6 2 -9 1.4 0.65
 -6 -2 -9 2.12 0.55
 -6 -2 9 1.17 0.42
 6 -2 -9 1.36 0.59
 -6 2 -9 2.09 0.57
 7 2 -9 0.36 0.45
 -7 -2 -9 0.42 0.44
 -7 2 -9 0.45 0.44
 7 -2 -9 0.04 0.49
 0 3 -9 5.69 0.6
 0 3 9 5.76 0.4
 0 -3 -9 5.87 0.39
 0 3 -9 6.06 0.51
 0 -3 9 6.13 0.53
 0 -3 -9 6.2 0.44
 1 3 -9 21.25 1.07
 -1 3 9 20.87 0.83
 1 -3 9 21.45 1.05
 1 3 -9 21.08 0.99
 -1 -3 -9 20.32 0.84
 -1 3 9 20.76 0.89
 -1 -3 -9 19.44 0.8
 -1 -3 9 18.89 0.94
 -1 3 -9 19.33 0.95
 1 -3 -9 20.84 0.86
 1 -3 -9 20.37 0.94
 -1 -3 9 19.4 1.01
 -1 3 -9 20.57 1.02
 -2 3 9 10.1 0.62
 -2 3 9 11.86 0.74
 -2 -3 -9 10.83 0.61
 2 3 -9 12.06 0.87
 2 3 -9 11.32 0.75
 2 -3 9 11.94 0.72
 -2 -3 -9 10.8 0.65
 -2 3 -9 11.3 0.73
 2 -3 -9 11.16 0.67
 -2 3 -9 11.81 0.8
 2 -3 -9 11.55 0.76
 -2 -3 9 11.96 0.75
 2 3 9 11.99 0.59
 -2 -3 9 11.09 0.78
 -3 3 9 36.96 1.49
 3 3 -9 39.17 1.63
 3 3 -9 35.58 1.72
 -3 -3 -9 37.09 1.43
 3 -3 9 37.71 1.52
 -3 -3 -9 37.79 1.47
 -3 3 9 38.98 1.64
 -3 3 -9 37.3 1.57
 -3 -3 9 38.77 1.73
 -3 -3 9 36.59 1.57
 3 -3 -9 32.14 1.6
 3 -3 -9 38.11 1.54
 -3 3 -9 34.29 1.64
 4 3 -9 7.36 0.83
 4 3 -9 5.46 0.85
 -4 3 9 5.84 0.77
 -4 3 9 7.35 0.77
 4 -3 9 5.57 0.66
 -4 -3 -9 5.42 0.62
 -4 -3 9 6.69 0.76
 -4 3 -9 4.89 0.69
 -4 -3 9 6.28 0.82
 4 -3 -9 5.58 0.81
 -4 3 -9 6.01 0.78
 4 -3 -9 6.35 0.71
 -5 3 9 0.43 0.42
 -5 -3 -9 1.59 0.41
 5 3 -9 -0.1 0.36
 -5 3 9 0.47 0.28
 5 3 -9 1.02 0.44
 5 -3 -9 1.04 0.49
 -5 -3 9 1.08 0.41
 -5 3 -9 0.96 0.41
 5 -3 -9 0.53 0.31
 -6 -3 -9 0.87 0.44
 6 3 -9 0.63 0.46
 6 -3 -9 -0.29 0.39
 -6 -3 9 0.52 0.41
 -6 3 -9 0.67 0.44
 -7 -3 -9 2.23 0.57
 7 3 -9 1.63 0.63
 -7 3 -9 1.47 0.58
 7 -3 -9 2.52 0.73
 0 4 9 54.65 1.69
 0 -4 9 58.04 2.03
 0 -4 -9 56.14 1.74
 0 -4 -9 53.99 1.67
 0 4 -9 55.63 2.01
 0 4 -9 56.07 1.93
 -1 4 9 18.31 0.74
 -1 4 9 17.42 0.79
 1 4 -9 17 1
 1 4 -9 18.86 0.93
 -1 -4 -9 17.56 0.74
 -1 -4 -9 17.81 0.71
 1 -4 9 15.74 0.93
 -1 -4 9 16.94 0.89
 1 -4 -9 18.25 0.78
 1 -4 -9 17.95 0.85
 -1 4 -9 18.25 0.93
 -1 4 -9 18.48 0.92
 -1 -4 9 18.67 0.99
 -1 4 -9 17.6 0.98
 2 4 -9 8.37 0.73
 2 -4 9 7.12 0.59
 -2 -4 -9 8.14 0.5
 2 4 -9 8.3 0.66
 -2 -4 -9 7.55 0.52
 -2 4 9 8.44 0.61
 -2 4 9 7.69 0.52
 2 -4 -9 7.82 0.56
 2 4 9 7.9 0.46
 2 -4 -9 7.5 0.62
 -2 -4 9 7.63 0.68
 -2 4 -9 6.28 0.7
 -2 -4 9 6.38 0.6
 -2 4 -9 8.03 0.64
 -3 -4 -9 1.17 0.28
 -3 -4 -9 1.04 0.31
 -3 4 9 0.87 0.27
 3 -4 9 1.14 0.34
 -3 4 9 0.79 0.33
 3 4 -9 0.91 0.4
 3 4 -9 0.16 0.24
 -3 4 -9 0.91 0.33
 3 -4 -9 0.69 0.27
 -3 4 -9 0.74 0.33
 3 -4 -9 1.04 0.37
 -3 -4 9 1.12 0.37
 -3 -4 9 1.04 0.33
 4 4 -9 2.67 0.62
 -4 4 9 1.55 0.47
 4 4 -9 3.09 0.55
 4 -4 9 1.91 0.41
 -4 -4 -9 2.53 0.46
 -4 4 -9 3.03 0.55
 -4 -4 9 3.12 0.57
 4 -4 -9 1.73 0.49
 4 -4 -9 1.36 0.41
 -4 4 -9 2.14 0.51
 -5 4 9 -0.03 0.19
 5 4 -9 0.28 0.38
 -5 -4 -9 0.55 0.3
 5 4 -9 -0.23 0.28
 -5 4 9 0.42 0.32
 -5 -4 9 0.45 0.34
 -5 4 -9 0.02 0.29
 5 -4 -9 0.24 0.3
 5 -4 -9 0.24 0.36
 -6 -4 -9 3.6 0.64
 6 4 -9 2.42 0.69
 -6 4 -9 2.53 0.59
 -6 -4 9 2.28 0.57
 6 -4 -9 3.4 0.79
 7 4 -9 8.48 1.3
 -7 -4 -9 8.79 1.06
 7 -4 -9 6.18 1.04
 -7 4 -9 9.1 1.15
 0 -5 9 0.26 0.23
 0 5 -9 0.25 0.26
 0 5 -9 0.23 0.27
 0 -5 -9 0.36 0.16
 0 5 -9 -0.03 0.2
 0 -5 -9 0.14 0.12
 0 5 9 0.08 0.1
 -1 5 9 19.61 0.82
 1 5 -9 19.75 1.01
 -1 -5 -9 20.19 0.74
 -1 -5 -9 20.79 0.78
 1 5 -9 19.08 1.1
 1 -5 9 18.48 1.05
 -1 5 9 21.35 0.79
 1 -5 -9 19.93 0.82
 -1 -5 9 19.6 1
 -1 -5 9 21.94 1.12
 -1 5 -9 21.01 1.03
 -1 5 -9 20.46 1.08
 1 -5 -9 19.58 0.88
 -1 5 -9 21.74 1.03
 -2 -5 -9 1.75 0.3
 2 5 -9 1 0.31
 -2 5 9 1.31 0.25
 2 -5 9 1.71 0.36
 -2 -5 -9 1.36 0.25
 -2 -5 -9 1.84 0.26
 -2 5 9 1.62 0.32
 2 5 -9 1.32 0.41
 2 5 9 1.78 0.23
 -2 -5 9 1.68 0.37
 -2 -5 9 1.58 0.41
 -2 5 -9 1.1 0.32
 2 -5 -9 1.53 0.3
 2 -5 -9 1.35 0.33
 -2 5 -9 1.39 0.4
 3 5 -9 3.2 0.5
 3 -5 9 3.33 0.49
 -3 -5 -9 4.71 0.54
 -3 5 9 3 0.5
 -3 -5 -9 3.53 0.43
 -3 5 9 3.79 0.47
 3 5 -9 4.08 0.69
 -3 5 -9 4.53 0.63
 3 -5 -9 4.73 0.66
 -3 5 -9 3.56 0.62
 -3 -5 9 4.05 0.63
 -3 -5 9 3.89 0.57
 3 -5 -9 4.17 0.51
 4 5 -9 4.9 0.81
 -4 5 9 5.65 0.63
 -4 5 9 5.46 0.75
 4 -5 9 4.72 0.62
 4 5 -9 5.01 0.71
 -4 -5 -9 5.31 0.59
 -4 5 -9 6.92 0.82
 4 -5 -9 5.38 0.75
 4 -5 -9 6.17 0.72
 -4 -5 9 4.2 0.62
 -4 5 -9 5.84 0.85
 -5 -5 -9 1.17 0.37
 5 5 -9 2.18 0.54
 -5 5 9 0.99 0.35
 -5 5 9 1.71 0.51
 5 5 -9 1.08 0.49
 5 -5 -9 2.22 0.49
 5 -5 -9 0.69 0.45
 -5 5 -9 0.33 0.39
 -5 5 -9 2.32 0.59
 -5 -5 9 2.2 0.53
 -6 -5 -9 0.48 0.34
 6 5 -9 0.35 0.45
 -6 -5 9 -0.13 0.31
 -6 5 -9 0.59 0.4
 6 -5 -9 0.12 0.35
 -7 -5 -9 -0.05 0.32
 7 5 -9 0.37 0.52
 7 -5 -9 0.55 0.53
 -7 5 -9 0.69 0.49
 0 6 -9 139.17 4.28
 0 6 -9 141.01 4.21
 0 6 9 143.55 3.78
 0 -6 9 145.68 4.34
 0 -6 -9 143.54 3.79
 0 -6 -9 147.02 3.85
 0 6 -9 139.45 4.32
 1 6 -9 0.19 0.24
 -1 -6 -9 0.47 0.13
 1 -6 9 0.66 0.32
 -1 -6 -9 0.44 0.14
 -1 -6 -9 0.37 0.13
 1 6 -9 0.27 0.24
 -1 6 9 0.4 0.13
 1 -6 -9 0.39 0.18
 1 -6 -9 0.26 0.15
 -1 6 -9 0.02 0.22
 -1 6 -9 0.5 0.28
 -1 -6 9 0.56 0.29
 -1 -6 9 0.63 0.26
 -1 6 -9 0.52 0.25
 2 6 -9 0.22 0.22
 2 6 -9 0.43 0.32
 -2 -6 -9 0.97 0.21
 -2 6 9 0.34 0.18
 -2 -6 -9 0.43 0.16
 2 -6 9 0.28 0.22
 -2 6 9 0.25 0.21
 -2 -6 -9 0.57 0.19
 -2 6 -9 0.5 0.29
 2 -6 -9 0.17 0.18
 -2 -6 9 0.49 0.28
 -2 6 -9 0.89 0.31
 -2 -6 9 -0.12 0.23
 2 -6 -9 0.19 0.21
 2 6 9 0.46 0.13
 -3 -6 -9 3.79 0.43
 -3 6 9 4.65 0.6
 3 6 -9 3.75 0.65
 3 6 -9 7.13 0.78
 -3 6 9 3.69 0.46
 3 -6 9 4.91 0.63
 -3 -6 -9 4.67 0.53
 -3 6 -9 3.62 0.55
 3 -6 -9 3.83 0.52
 -3 -6 9 3.51 0.54
 3 -6 -9 4.07 0.6
 -3 6 -9 5.56 0.73
 -4 -6 -9 11.03 0.76
 4 6 -9 11.43 0.93
 4 -6 9 11.77 0.87
 -4 6 9 11.89 0.93
 4 6 -9 11.38 1.08
 -4 6 9 11.57 0.81
 4 -6 -9 10.46 0.82
 4 -6 -9 12.67 0.99
 -4 6 -9 11.44 0.92
 -4 -6 9 11.55 0.91
 -4 6 -9 13.05 1.04
 -5 -6 -9 10.71 0.85
 5 6 -9 10.01 1.24
 -5 6 9 11.13 0.99
 5 6 -9 10.87 0.96
 5 -6 -9 10.04 0.96
 -5 -6 9 11.64 1
 -5 6 -9 12.72 1.32
 -5 6 -9 12.16 1.03
 -6 -6 -9 1.65 0.5
 6 6 -9 2.4 0.72
 -6 -6 9 2.16 0.61
 6 -6 -9 1.56 0.57
 -6 6 -9 1.19 0.47
 -6 6 -9 3.62 0.78
 0 7 -9 71 2.39
 0 -7 9 71.31 2.49
 0 7 9 68.45 1.85
 0 7 -9 70.38 2.42
 0 -7 -9 70.59 1.95
 0 -7 -9 67.39 1.91
 0 7 -9 67.66 2.48
 1 -7 9 11.49 0.82
 -1 -7 -9 10.13 0.4
 -1 7 9 10.12 0.45
 -1 -7 -9 9.69 0.4
 -1 -7 -9 10.13 0.41
 1 7 -9 8.74 0.7
 -1 -7 -9 10.74 0.42
 -1 7 9 9.72 0.5
 1 7 -9 10.63 0.82
 1 -7 -9 10.54 0.57
 -1 7 -9 9.76 0.79
 -1 7 -9 10.78 0.76
 -1 7 -9 11.13 0.76
 -1 -7 9 11.53 0.84
 1 -7 -9 10.24 0.52
 -1 -7 9 9.37 0.7
 2 -7 9 1.45 0.37
 -2 -7 -9 2.09 0.28
 2 7 -9 1.19 0.41
 2 7 -9 1.34 0.38
 -2 7 9 1.88 0.29
 -2 -7 -9 1.64 0.25
 -2 7 9 2.05 0.35
 2 -7 9 1.21 0.37
 -2 -7 -9 1.9 0.26
 2 -7 -9 2.05 0.33
 2 -7 -9 1.64 0.34
 -2 7 -9 1.69 0.42
 -2 7 -9 1.89 0.41
 -2 -7 9 2.1 0.47
 -2 -7 9 1.99 0.42
 3 7 -9 15.06 1.14
 -3 -7 -9 15.89 0.79
 -3 -7 -9 16.5 0.88
 3 7 -9 15.32 1.02
 -3 7 9 16.24 0.86
 -3 7 9 15.45 0.96
 3 -7 9 18.39 1.05
 3 -7 -9 16.21 0.9
 -3 7 -9 14.06 1.08
 -3 -7 9 15.79 1.02
 3 -7 -9 16.82 1.02
 -3 7 -9 17.92 1.07
 -4 7 9 27.6 1.33
 4 7 -9 26.71 1.63
 4 7 -9 30.25 1.53
 4 -7 9 28.62 1.44
 -4 -7 -9 27.25 1.24
 -4 7 9 30.66 1.52
 -4 7 -9 29.5 1.52
 4 -7 -9 30.61 1.41
 -4 7 -9 25.06 1.55
 -4 -7 9 26.31 1.45
 4 -7 -9 26.85 1.48
 5 7 -9 4.89 0.88
 5 -7 9 5.12 0.74
 -5 -7 -9 5.14 0.66
 -5 7 9 5.67 0.86
 -5 -7 9 5.88 0.82
 5 -7 -9 6.19 0.88
 -5 7 -9 5.62 0.81
 -5 7 -9 5.65 0.87
 6 7 -9 1.97 0.7
 -6 -7 -9 4.06 0.67
 6 -7 -9 4.94 0.85
 -6 7 -9 4.38 0.75
 -6 7 -9 3.86 0.8
 -6 -7 9 4.79 0.83
 0 -8 -9 12.71 0.45
 0 8 -9 10.7 0.79
 0 8 -9 14.31 0.86
 0 8 -9 12.33 0.88
 0 -8 9 14.71 0.94
 1 8 -9 9.68 0.83
 -1 -8 -9 9.55 0.34
 1 -8 9 8.84 0.78
 1 8 -9 10.83 0.77
 -1 8 9 9.34 0.47
 -1 8 9 10.26 0.42
 -1 8 -9 11.42 0.78
 -1 8 -9 8.95 0.73
 1 -8 -9 9.84 0.49
 1 -8 -9 9.9 0.52
 -1 -8 9 8.66 0.69
 -1 8 -9 8.59 0.75
 -1 -8 9 9.73 0.78
 -2 8 9 4.24 0.38
 -2 -8 -9 4.37 0.32
 -2 -8 -9 4.85 0.37
 2 8 -9 5.99 0.7
 2 8 -9 4.31 0.68
 2 -8 9 4.94 0.68
 2 -8 9 4.92 0.66
 -2 8 9 5.09 0.45
 -2 -8 -9 4.37 0.33
 2 -8 -9 4.7 0.51
 2 -8 -9 5.1 0.44
 -2 8 -9 5.13 0.69
 -2 8 -9 4.68 0.59
 -2 -8 9 4.05 0.57
 3 8 -9 5.5 0.71
 -3 8 9 5.1 0.55
 3 -8 9 5.42 0.68
 -3 8 9 4.31 0.59
 -3 -8 -9 4.9 0.52
 -3 -8 -9 4.46 0.42
 3 8 -9 5.39 0.82
 -3 8 -9 3.6 0.64
 -3 8 -9 5.85 0.75
 -3 -8 9 4.13 0.6
 3 -8 -9 5.02 0.55
 3 -8 -9 5.11 0.64
 -4 8 9 0.28 0.23
 -4 8 9 0.39 0.3
 4 8 -9 0.08 0.21
 -4 -8 -9 0.62 0.27
 4 8 -9 0.49 0.37
 4 -8 9 0.55 0.31
 4 -8 -9 0.61 0.34
 4 -8 -9 0.58 0.26
 -4 8 -9 -0.01 0.35
 -4 -8 9 0.42 0.32
 -4 8 -9 0.1 0.31
 5 -8 9 2.61 0.57
 -5 -8 -9 1.91 0.44
 5 8 -9 2.58 0.75
 -5 8 -9 3.08 0.68
 -5 8 -9 2.16 0.63
 -5 -8 9 2.16 0.53
 5 -8 -9 2.13 0.56
 6 8 -9 0.02 0.46
 -6 -8 -9 0.04 0.3
 -6 -8 9 0.72 0.42
 -6 8 -9 0.13 0.33
 6 -8 -9 0.58 0.38
 -6 8 -9 0.46 0.47
 0 9 -9 2.47 0.46
 0 9 -9 2.61 0.47
 0 9 -9 1.71 0.42
 0 -9 9 2.06 0.52
 1 9 -9 11.85 0.83
 -1 9 9 9.85 0.46
 1 9 -9 9.21 0.83
 -1 9 9 10.88 0.4
 -1 9 -9 11 0.8
 -1 9 -9 8.52 0.78
 -1 9 -9 11.53 0.8
 1 -9 -9 10.68 0.51
 1 -9 -9 10.46 0.5
 -1 -9 9 11.48 0.81
 2 9 -9 17.46 1.19
 2 9 -9 20.58 1.15
 -2 -9 -9 19.34 0.7
 2 -9 9 20.32 1.16
 -2 9 9 20.05 0.82
 -2 -9 -9 19.47 0.72
 -2 9 9 18.45 0.89
 -2 -9 -9 18.28 0.69
 -2 9 -9 18.88 1.11
 2 -9 -9 18.53 0.86
 2 -9 -9 19.55 0.91
 -2 9 -9 18.99 1.19
 -2 -9 9 18.52 1.09
 3 -9 9 4.16 0.62
 -3 9 9 4.3 0.48
 -3 9 9 4.03 0.57
 3 9 -9 3.76 0.68
 -3 -9 -9 4.36 0.49
 3 9 -9 3.85 0.6
 -3 -9 -9 3.88 0.41
 -3 9 -9 3.73 0.61
 3 -9 -9 4.69 0.58
 -3 9 -9 5.49 0.83
 3 -9 -9 4.71 0.55
 -3 -9 9 3.99 0.61
 -4 9 9 5.02 0.61
 4 -9 9 4.44 0.68
 4 9 -9 3.71 0.74
 -4 9 9 3.96 0.64
 -4 -9 -9 4.09 0.49
 -4 9 -9 4.04 0.7
 -4 -9 9 5.58 0.81
 -4 9 -9 4.26 0.77
 4 -9 -9 3.79 0.6
 4 -9 -9 5.05 0.64
 5 9 -9 14.69 1.31
 -5 -9 -9 14.86 0.96
 -5 -9 9 12.82 1.09
 5 -9 -9 14.29 1.12
 -5 9 -9 13.51 1.12
 -5 9 -9 12.79 1.22
 6 9 -9 0.93 0.59
 -6 -9 -9 0.61 0.35
 -6 9 -9 1.3 0.53
 -6 -9 9 0.62 0.37
 0 10 -9 3.14 0.5
 0 10 -9 3.38 0.6
 0 10 -9 3.35 0.55
 1 10 -9 36.32 1.59
 -1 10 9 33.17 1.05
 1 10 -9 33.96 1.67
 -1 -10 9 35.62 1.56
 1 -10 -9 35.28 1.13
 -1 10 -9 38.45 1.62
 -1 10 -9 35.8 1.58
 -1 10 -9 33.12 1.67
 2 -10 9 2.9 0.58
 2 10 -9 3.8 0.68
 -2 -10 -9 2.87 0.22
 -2 10 9 3.53 0.36
 2 10 -9 2.82 0.52
 -2 -10 -9 3.01 0.23
 -2 -10 -9 3.19 0.22
 -2 10 -9 3.4 0.59
 -2 -10 9 2.63 0.49
 2 -10 -9 2.52 0.36
 -2 10 -9 2.74 0.56
 2 -10 -9 3.14 0.39
 -3 10 9 7.77 0.56
 -3 10 9 7.43 0.64
 3 -10 9 6.37 0.74
 3 10 -9 8.49 1.02
 -3 -10 -9 7 0.48
 -3 -10 -9 7.07 0.53
 3 -10 -9 6.28 0.6
 -3 -10 9 8.86 0.8
 -3 10 -9 6.95 0.83
 -3 10 -9 7.41 0.91
 3 -10 -9 7.64 0.6
 -4 -10 -9 1.05 0.27
 4 -10 9 0.67 0.38
 4 10 -9 2.11 0.62
 -4 -10 9 0.82 0.38
 4 -10 -9 0.96 0.33
 4 -10 -9 1.24 0.4
 -4 10 -9 1.32 0.49
 -4 10 -9 0.63 0.36
 5 10 -9 1.81 0.65
 -5 -10 -9 2.81 0.47
 -5 10 -9 1.78 0.56
 -5 -10 9 2.65 0.65
 -5 10 -9 2.99 0.68
 5 -10 -9 2.81 0.58
 -6 -10 -9 2.15 0.49
 6 10 -9 0.42 0.48
 -6 -10 9 1.14 0.48
 -6 10 -9 1.25 0.58
 0 11 -9 0.24 0.25
 0 11 -9 0.73 0.33
 0 11 -9 0.97 0.37
 1 11 -9 20.87 1.31
 1 11 -9 20.47 1.19
 1 -11 -9 22.06 0.78
 -1 11 -9 24.58 1.26
 -1 -11 9 20.66 1.17
 -1 11 -9 22.12 1.21
 -1 11 -9 21.04 1.29
 -2 -11 -9 1.36 0.15
 2 11 -9 1.11 0.46
 -2 11 9 1.43 0.28
 -2 11 9 1.28 0.23
 -2 -11 9 1.73 0.43
 -2 11 -9 1.21 0.39
 -2 11 -9 1.63 0.46
 2 -11 -9 1.64 0.29
 3 11 -9 0.33 0.34
 3 -11 9 0.6 0.29
 -3 11 9 0.07 0.15
 -3 11 9 0.3 0.23
 -3 -11 -9 0.36 0.2
 -3 -11 -9 0.36 0.18
 -3 -11 9 0.22 0.28
 3 -11 -9 0.18 0.2
 -3 11 -9 -0.04 0.24
 -3 11 -9 0.65 0.4
 4 11 -9 4.9 0.87
 -4 -11 -9 4.03 0.48
 4 -11 -9 3.94 0.59
 -4 11 -9 5.38 0.85
 -4 -11 9 4.34 0.75
 -4 11 -9 3.04 0.57
 -5 -11 -9 0.15 0.25
 5 11 -9 -0.02 0.35
 -5 11 -9 -0.64 0.22
 -5 -11 9 0.22 0.36
 0 12 -9 -0.24 0.18
 0 12 -9 0.03 0.28
 1 12 -9 3.12 0.57
 1 12 -9 3.7 0.64
 1 -12 -9 3.24 0.26
 -1 12 -9 2.79 0.5
 -1 12 -9 2.63 0.59
 2 12 -9 38.82 1.96
 -2 12 9 42.52 1.33
 -2 12 9 39.05 1.43
 -2 -12 9 37.37 1.75
 -2 12 -9 38.01 1.93
 -2 12 -9 42.99 1.87
 2 -12 -9 41.45 1.43
 -3 12 9 6.68 0.5
 3 -12 9 6.09 0.88
 3 12 -9 6.52 0.95
 -3 -12 -9 7.18 0.47
 -3 -12 -9 6.88 0.44
 3 -12 -9 7.88 0.61
 -3 12 -9 6.41 0.81
 -3 -12 9 7.02 0.85
 -3 12 -9 6.74 0.93
 -4 -12 -9 2.81 0.41
 4 12 -9 2.23 0.65
 -4 -12 9 2.35 0.53
 -4 12 -9 4.24 0.84
 5 12 -9 7.13 1.14
 -5 -12 -9 7.79 0.69
 -5 -12 9 7.39 0.99
 -5 12 -9 6.53 1.08
 0 13 -9 9.66 0.82
 0 13 -9 8.4 1
 1 13 -9 17.53 1.24
 1 13 -9 18.15 1.15
 1 -13 -9 17.34 0.65
 -1 13 -9 16.71 1.19
 -1 13 -9 17.84 1.13
 2 13 -9 8.55 1.08
 -2 13 9 8.04 0.52
 -2 13 9 6.86 0.5
 -2 13 -9 8.92 0.96
 -2 13 -9 7.98 1
 2 -13 -9 8.07 0.52
 -2 -13 9 7.42 0.89
 -3 -13 -9 2.43 0.29
 -3 -13 -9 2.5 0.29
 3 13 -9 2.13 0.64
 -3 13 9 1.54 0.3
 -3 -13 9 1.68 0.48
 -3 13 -9 1.84 0.54
 3 -13 -9 2.65 0.42
 4 13 -9 4.27 0.85
 -4 -13 -9 4.27 0.47
 -4 -13 9 5.91 0.86
 -4 13 -9 6.2 1
 5 13 -9 4.42 0.9
 -5 -13 -9 4.2 0.57
 -5 -13 9 3.23 0.66
 -5 13 -9 3.24 0.8
 0 14 -9 28.17 1.63
 0 14 -9 32.28 1.57
 1 14 -9 1.52 0.53
 1 14 -9 1.26 0.39
 -1 14 -9 0.88 0.37
 -1 14 -9 2.36 0.58
 1 -14 -9 1.4 0.2
 -2 14 9 4.14 0.39
 2 14 -9 5.09 0.84
 -2 14 -9 3.37 0.69
 2 -14 -9 4.46 0.41
 -2 -14 9 4.41 0.71
 -3 -14 -9 7.35 0.43
 3 14 -9 7.7 1.08
 -3 14 -9 8.73 1.11
 -3 -14 9 6.85 0.86
 3 -14 -9 7.58 0.61
 -4 -14 -9 0.11 0.19
 4 14 -9 0.12 0.42
 -4 -14 9 -0.12 0.29
 -4 14 -9 -0.18 0.34
 0 15 -9 3.15 0.71
 1 15 -9 4.1 0.77
 -1 15 -9 5.02 0.85
 2 15 -9 4.66 0.81
 -2 15 9 5.19 0.4
 2 -15 -9 4.69 0.42
 -2 15 -9 4.82 0.81
 -2 -15 9 5.16 0.78
 3 15 -9 2.94 0.74
 -3 -15 -9 2.58 0.27
 -3 15 9 3.33 0.49
 -3 15 -9 3.12 0.7
 -3 -15 9 3.14 0.64
 4 15 -9 0.36 0.5
 -4 -15 -9 2.2 0.35
 -4 15 -9 0.49 0.43
 -4 -15 9 1.32 0.52
 0 16 -9 6.34 0.89
 1 16 -9 5.95 0.97
 -1 16 -9 5.55 0.9
 -2 16 9 3.75 0.38
 2 16 -9 3.02 0.7
 -2 16 -9 3.49 0.8
 2 -16 -9 3.06 0.38
 -2 -16 9 3.69 0.7
 -3 16 9 3.3 0.49
 3 16 -9 2.05 0.67
 -3 -16 -9 2.51 0.23
 -3 16 -9 2.99 0.7
 -3 -16 9 2.48 0.62
 0 17 -9 4.79 0.87
 1 17 -9 2.48 0.67
 -1 17 -9 2.32 0.65
 2 17 -9 1.01 0.52
 -2 17 -9 0.67 0.44
 2 -17 -9 0.81 0.25
 -3 17 9 -0.06 0.22
 3 17 -9 0.57 0.44
 -3 17 -9 0.71 0.45
 -3 -17 9 0.04 0.29
 0 18 -9 2.89 0.68
 1 18 -9 0.62 0.49
 -1 18 -9 0.46 0.46
 0 0 -10 27.91 1.1
 0 0 10 27.73 1.16
 0 0 -10 26.37 1.15
 -1 0 -10 34.1 1.3
 -1 0 -10 33.55 1.36
 1 0 -10 34.6 1.33
 -1 0 -10 33.9 1.28
 -1 0 10 34.95 1.39
 1 0 10 36.03 1.4
 1 0 -10 32.09 1.39
 2 0 10 1.79 0.31
 -2 0 -10 2.64 0.45
 -2 0 10 2.35 0.38
 2 0 -10 2.77 0.41
 2 0 -10 2.67 0.48
 -2 0 -10 2.71 0.4
 -2 0 10 3.11 0.49
 3 0 10 0.23 0.19
 3 0 -10 0.15 0.22
 -3 0 10 0.11 0.24
 -3 0 -10 0.29 0.25
 3 0 -10 0.86 0.39
 -3 0 -10 0.13 0.26
 -3 0 10 0.09 0.28
 -4 0 -10 7.71 0.87
 4 0 -10 7.27 0.82
 -4 0 10 6.64 0.73
 4 0 -10 4.97 0.8
 -4 0 -10 6.44 0.74
 -4 0 10 8.25 0.97
 5 0 -10 0.8 0.47
 -5 0 -10 0.45 0.35
 5 0 -10 1.01 0.4
 -5 0 10 1.16 0.42
 6 0 -10 1.7 0.62
 -6 0 -10 2.67 0.63
 -7 0 -10 2.07 0.65
 7 0 -10 2.5 0.74
 0 1 -10 15.96 0.81
 0 1 -10 17.53 0.91
 0 1 10 15.74 0.81
 0 -1 -10 16.45 0.77
 0 -1 10 16.59 0.87
 0 -1 -10 16.88 0.84
 -1 -1 -10 5.29 0.43
 1 1 -10 4.42 0.54
 -1 1 10 4.95 0.43
 -1 1 10 5.15 0.49
 -1 -1 -10 5.4 0.44
 1 -1 10 5.81 0.54
 -1 -1 -10 4.37 0.5
 1 1 -10 5.44 0.49
 -1 1 -10 4.92 0.55
 -1 1 -10 5.68 0.49
 1 -1 -10 4.8 0.45
 1 1 10 5.71 0.5
 -1 -1 10 6.04 0.49
 -1 1 -10 5.17 0.46
 -1 -1 10 5.95 0.64
 1 -1 -10 5.6 0.59
 2 -1 10 17.62 0.9
 -2 -1 -10 18.84 0.96
 -2 -1 -10 17.82 0.88
 -2 1 10 21.24 1.07
 2 1 -10 17.84 1.07
 2 1 -10 18.2 0.96
 2 1 10 18 0.85
 2 -1 -10 17.76 1.04
 -2 -1 10 18.34 0.94
 -2 1 -10 17.38 0.99
 -2 -1 10 18.57 1.03
 -2 1 -10 18.47 0.94
 2 -1 -10 18.71 0.95
 3 -1 10 12.6 0.77
 -3 1 10 12.03 0.79
 -3 -1 -10 12.33 0.78
 3 1 -10 12.57 0.86
 -3 1 10 11.55 0.89
 3 1 -10 11.87 0.94
 -3 -1 -10 12.69 0.85
 -3 1 -10 11.26 0.8
 -3 -1 10 12.76 0.92
 -3 1 -10 12.82 0.91
 -3 -1 10 12.44 0.83
 3 -1 -10 12.62 0.96
 3 -1 -10 13.73 0.87
 4 1 -10 10.15 0.96
 -4 -1 -10 9.64 0.79
 4 1 -10 9.61 0.83
 -4 1 10 11.42 0.97
 -4 1 10 10.84 0.84
 -4 -1 10 10.46 0.95
 4 -1 -10 11.37 0.87
 4 -1 -10 9.88 0.93
 -4 1 -10 11.11 0.92
 -4 -1 10 10.41 0.84
 -4 1 -10 10.41 0.83
 5 1 -10 6.01 0.92
 5 1 -10 8.38 0.96
 -5 1 10 6.3 0.78
 -5 -1 -10 6.85 0.81
 5 -1 -10 6.34 0.96
 -5 1 -10 6.49 0.86
 5 -1 -10 5.92 0.8
 -5 -1 10 7.65 0.89
 -6 -1 -10 11.65 1.21
 6 1 -10 11.28 1.34
 6 -1 -10 10.18 1.27
 -6 1 -10 11.02 1.04
 7 1 -10 -0.02 0.49
 -7 -1 -10 0.27 0.42
 -7 1 -10 0.73 0.49
 7 -1 -10 0.94 0.56
 0 2 10 51.11 1.72
 0 -2 10 51.78 1.87
 0 -2 -10 51.37 1.68
 0 2 -10 55.32 1.83
 0 2 -10 52.32 1.9
 0 -2 -10 49.95 1.74
 1 2 -10 9.21 0.64
 -1 2 10 8.83 0.54
 -1 2 10 8.33 0.59
 -1 -2 -10 8.24 0.53
 -1 -2 -10 8.42 0.56
 -1 -2 -10 8.71 0.52
 1 -2 10 8.54 0.66
 1 2 -10 9.32 0.7
 1 2 10 8.23 0.56
 -1 -2 10 8.34 0.6
 -1 -2 10 8.98 0.67
 1 -2 -10 9.6 0.59
 -1 2 -10 8.57 0.61
 -1 2 -10 10.03 0.63
 1 -2 -10 8.22 0.64
 -1 2 -10 8.95 0.68
 2 2 -10 6.6 0.68
 2 2 -10 6.02 0.74
 -2 2 10 4.82 0.56
 -2 -2 -10 6.56 0.5
 -2 2 10 5.07 0.46
 -2 -2 -10 5.7 0.51
 2 -2 10 5.55 0.52
 -2 -2 10 4.7 0.53
 -2 2 -10 5.27 0.57
 -2 -2 10 7.25 0.75
 -2 2 -10 6.08 0.68
 2 2 10 6.54 0.47
 2 -2 -10 5.95 0.66
 2 -2 -10 6.04 0.53
 3 -2 10 16.11 0.91
 -3 -2 -10 16.23 0.89
 3 2 -10 15.81 0.99
 -3 -2 -10 16.48 0.95
 3 2 -10 16.12 1.13
 -3 2 10 16.73 1.04
 -3 -2 10 14.94 0.94
 -3 2 -10 17.02 0.98
 -3 2 -10 16.17 1.05
 3 -2 -10 17.03 1.09
 3 -2 -10 17.23 0.97
 -3 -2 10 16.02 1.05
 -4 2 10 6.47 0.82
 4 2 -10 7.03 0.79
 -4 -2 -10 7.56 0.78
 4 2 -10 7.56 0.98
 -4 2 10 7.85 0.71
 4 -2 -10 5.55 0.79
 -4 2 -10 8.16 0.93
 -4 -2 10 8.06 0.96
 4 -2 -10 6.63 0.75
 -4 2 -10 7.96 0.75
 -4 -2 10 7.39 0.83
 5 2 -10 0.87 0.47
 -5 -2 -10 0.92 0.37
 -5 2 10 1.27 0.39
 -5 2 10 0.98 0.49
 5 2 -10 0.88 0.43
 5 -2 -10 0.95 0.51
 -5 2 -10 0.85 0.39
 -5 -2 10 1.25 0.44
 5 -2 -10 1.37 0.43
 6 2 -10 1.2 0.61
 -6 -2 -10 0.92 0.42
 6 -2 -10 -0.22 0.41
 -6 2 -10 0.62 0.41
 -6 -2 10 0.35 0.37
 7 2 -10 3.9 0.9
 -7 -2 -10 5.31 0.85
 -7 2 -10 3.86 0.79
 7 -2 -10 4.62 0.98
 0 3 -10 50.33 1.74
 0 -3 10 47.09 1.79
 0 3 10 45.81 1.57
 0 -3 -10 46.65 1.53
 0 3 -10 46.51 1.79
 0 -3 -10 48.29 1.62
 -1 3 10 50.06 1.68
 -1 3 10 48.54 1.59
 1 -3 10 47.59 1.84
 -1 -3 -10 48.04 1.55
 1 3 -10 49.88 1.78
 1 3 -10 48.04 1.88
 -1 -3 -10 46.6 1.61
 -1 -3 -10 48.12 1.57
 -1 -3 10 47.94 1.74
 -1 -3 10 47.65 1.84
 1 -3 -10 49.22 1.74
 -1 3 -10 45.57 1.74
 -1 3 -10 45.59 1.81
 -1 3 -10 50.12 1.76
 1 3 10 48.89 1.62
 1 -3 -10 47.67 1.62
 -2 -3 -10 6.65 0.54
 2 -3 10 8.7 0.64
 -2 -3 -10 7.11 0.5
 2 3 -10 6.87 0.62
 2 3 -10 8.41 0.87
 -2 3 10 7.05 0.58
 -2 3 10 6.38 0.51
 -2 -3 10 6.54 0.59
 -2 3 -10 8.06 0.81
 -2 3 -10 6.43 0.59
 2 3 10 6.47 0.45
 2 -3 -10 5.41 0.62
 -2 -3 10 7.68 0.7
 2 -3 -10 6.26 0.53
 -3 -3 -10 16.34 0.93
 3 -3 10 16.17 0.93
 3 3 -10 16.49 1.13
 -3 -3 -10 15.87 0.87
 -3 3 10 17.96 1.05
 -3 -3 -10 18.33 0.92
 3 3 -10 16.47 1.01
 -3 3 10 16.9 0.93
 3 -3 -10 16.11 0.95
 -3 -3 10 15.94 1.1
 3 -3 -10 14.71 1.02
 -3 3 -10 16.92 1.09
 -3 -3 10 16.35 0.98
 -3 3 -10 17.29 1.01
 -4 3 10 17.08 1.03
 -4 3 10 17.05 1.17
 4 3 -10 20.58 1.21
 -4 -3 -10 19.16 1.06
 4 3 -10 20.15 1.36
 -4 3 -10 20.3 1.18
 -4 -3 10 17.96 1.12
 4 -3 -10 18.2 1.11
 4 -3 -10 17.16 1.23
 -4 3 -10 18.44 1.22
 5 3 -10 -0.3 0.31
 -5 3 10 0.7 0.32
 5 3 -10 0.05 0.3
 -5 -3 -10 1.1 0.38
 -5 3 10 0.57 0.37
 -5 3 -10 0.91 0.43
 5 -3 -10 0.71 0.48
 -5 3 -10 0.28 0.33
 5 -3 -10 0.36 0.3
 -5 -3 10 0.34 0.32
 -6 -3 -10 0.46 0.36
 6 3 -10 0.35 0.45
 6 -3 -10 0.46 0.44
 -6 3 -10 -0.16 0.35
 -6 -3 10 0.54 0.37
 7 3 -10 0.24 0.44
 -7 -3 -10 0.77 0.49
 -7 3 -10 0.85 0.5
 7 -3 -10 0.84 0.54
 0 4 -10 5.86 0.54
 0 4 10 6.02 0.42
 0 -4 10 6.1 0.58
 0 -4 -10 6.78 0.47
 0 4 -10 6.83 0.61
 0 -4 -10 5.98 0.41
 1 4 -10 30.37 1.34
 1 -4 10 32.76 1.44
 1 4 -10 31.34 1.47
 -1 -4 -10 30.53 1.15
 -1 -4 -10 32.49 1.11
 -1 4 10 30.85 1.19
 -1 4 10 32.31 1.14
 -1 -4 -10 31.92 1.11
 -1 4 -10 30.31 1.33
 1 -4 -10 32.11 1.18
 -1 -4 10 32.25 1.34
 -1 4 -10 32.8 1.34
 1 -4 -10 31.7 1.27
 -1 4 -10 32.36 1.43
 -1 -4 10 32.57 1.43
 -2 -4 -10 1.9 0.3
 -2 -4 -10 2.31 0.35
 2 4 -10 1.77 0.45
 -2 4 10 1.65 0.35
 2 4 -10 1.28 0.32
 2 -4 10 1.78 0.36
 -2 4 10 1.52 0.29
 -2 -4 10 1.22 0.32
 -2 4 -10 2.1 0.45
 -2 -4 10 1.96 0.46
 2 4 10 1.64 0.26
 2 -4 -10 1.37 0.31
 2 -4 -10 1.88 0.41
 -2 4 -10 1.84 0.39
 -3 4 10 6.59 0.56
 -3 4 10 6.72 0.73
 -3 -4 -10 5.57 0.53
 3 4 -10 6.81 0.87
 -3 -4 -10 6.14 0.54
 3 -4 10 6.05 0.67
 -3 -4 -10 6.5 0.57
 3 4 -10 5.82 0.68
 -3 -4 10 6.16 0.69
 3 -4 -10 6.49 0.61
 -3 4 -10 5.97 0.69
 -3 4 -10 7.06 0.84
 -3 -4 10 8.58 0.96
 3 -4 -10 4.97 0.68
 -4 4 10 3.97 0.64
 4 4 -10 4.4 0.66
 4 4 -10 3.93 0.72
 -4 -4 -10 3.92 0.55
 4 -4 10 4.46 0.64
 -4 4 10 3.34 0.5
 -4 4 -10 4.91 0.67
 -4 -4 10 3.94 0.6
 4 -4 -10 3.87 0.68
 4 -4 -10 4.12 0.59
 -4 4 -10 4.29 0.7
 5 4 -10 1.35 0.53
 -5 4 10 0.72 0.34
 5 4 -10 0.27 0.35
 -5 -4 -10 0.65 0.33
 -5 4 10 0.3 0.26
 5 -4 -10 0.76 0.45
 -5 4 -10 0.69 0.39
 -5 4 -10 1.05 0.43
 -5 -4 10 1.11 0.43
 6 4 -10 2.74 0.72
 -6 -4 -10 3.33 0.61
 -6 -4 10 3.32 0.67
 6 -4 -10 2.38 0.68
 -6 4 -10 3.44 0.69
 0 -5 10 4.3 0.59
 0 5 -10 4.29 0.58
 0 5 -10 5.22 0.59
 0 -5 -10 3.98 0.37
 0 5 -10 4.55 0.6
 0 -5 -10 4.09 0.33
 -1 5 10 8.56 0.53
 -1 -5 -10 8.66 0.46
 1 5 -10 8.51 0.75
 1 -5 10 8.87 0.71
 -1 -5 -10 8.11 0.44
 1 5 -10 8.75 0.68
 -1 5 10 8.53 0.48
 -1 -5 -10 8.73 0.5
 1 -5 -10 8.7 0.52
 1 -5 -10 8.9 0.58
 -1 -5 10 8.66 0.71
 -1 5 -10 7.73 0.68
 -1 -5 10 7.59 0.63
 -1 5 -10 8.38 0.66
 -1 5 -10 9.29 0.68
 -2 -5 -10 7.95 0.53
 2 5 -10 8.37 0.93
 2 5 -10 8.55 0.71
 -2 5 10 7.98 0.61
 2 -5 10 7.35 0.65
 -2 -5 -10 7.21 0.49
 -2 5 10 7.6 0.53
 -2 5 -10 7.02 0.78
 -2 -5 10 8.96 0.7
 2 -5 -10 8.59 0.67
 -2 5 -10 8.02 0.69
 2 -5 -10 8.77 0.59
 -2 -5 10 9.5 0.8
 3 -5 10 7.44 0.67
 -3 5 10 6.03 0.55
 -3 -5 -10 6.98 0.58
 3 5 -10 8.36 0.86
 3 5 -10 6.65 0.85
 -3 5 10 6.34 0.72
 -3 -5 -10 6.29 0.53
 -3 -5 -10 6.57 0.57
 3 -5 -10 6.65 0.77
 -3 5 -10 8.22 0.91
 3 -5 -10 7.96 0.65
 -3 5 -10 6.15 0.7
 -3 -5 10 7.68 0.86
 -3 -5 10 5.83 0.69
 -4 5 10 12.39 0.84
 4 -5 10 10.56 0.84
 4 5 -10 10.76 0.9
 4 5 -10 8.45 1.08
 -4 5 10 9.25 0.86
 -4 -5 -10 11.96 0.79
 -4 -5 10 10.08 0.86
 -4 5 -10 9.97 1.1
 4 -5 -10 10.17 0.94
 4 -5 -10 10.84 0.83
 -4 5 -10 11.78 0.94
 5 5 -10 1.22 0.47
 -5 5 10 0.79 0.42
 -5 -5 -10 1.01 0.37
 5 5 -10 1.09 0.5
 -5 5 -10 1.39 0.46
 -5 5 -10 0.31 0.4
 -5 -5 10 1.61 0.5
 5 -5 -10 0.54 0.46
 -6 -5 -10 1.1 0.41
 6 5 -10 1.11 0.58
 -6 5 -10 -0.42 0.28
 6 -5 -10 0.69 0.51
 -6 -5 10 0.15 0.34
 -6 5 -10 0.64 0.51
 0 -6 10 22.2 1.18
 0 6 -10 21.85 1.19
 0 -6 -10 23.4 0.88
 0 6 -10 24.23 1.15
 0 -6 -10 23.08 0.83
 0 6 -10 23.61 1.18
 0 6 10 22.9 0.82
 -1 -6 -10 11.09 0.53
 1 6 -10 10.56 0.77
 -1 -6 -10 11.3 0.49
 -1 6 10 8.94 0.52
 -1 6 10 11.01 0.53
 -1 -6 -10 11.15 0.5
 1 6 -10 12.44 0.89
 1 -6 10 11.91 0.85
 -1 -6 10 10.91 0.82
 -1 6 -10 11.64 0.79
 -1 6 -10 12.51 0.89
 -1 -6 10 10.82 0.74
 -1 6 -10 11.68 0.78
 1 -6 -10 10.55 0.63
 1 -6 -10 10.31 0.57
 2 6 -10 1.25 0.37
 -2 6 10 0.98 0.23
 -2 6 10 1.16 0.29
 2 -6 10 0.79 0.31
 -2 -6 -10 1.06 0.23
 2 6 -10 0.56 0.38
 -2 -6 -10 1.05 0.24
 -2 -6 -10 1.04 0.22
 2 -6 10 0.96 0.34
 -2 -6 10 0.66 0.34
 2 -6 -10 1.33 0.29
 -2 6 -10 0.77 0.33
 2 -6 -10 1.38 0.35
 -2 6 -10 0.79 0.35
 -2 -6 10 0.81 0.3
 -3 -6 -10 9.23 0.65
 3 -6 10 9.37 0.76
 -3 6 10 8.65 0.73
 3 6 -10 9.09 0.77
 -3 -6 -10 8.93 0.62
 -3 -6 -10 9.1 0.61
 3 6 -10 9.07 1.02
 -3 6 10 7.7 0.61
 -3 6 -10 10.42 1.08
 3 -6 -10 8.89 0.68
 3 -6 -10 9.85 0.81
 -3 -6 10 9.02 0.75
 -3 6 -10 8.36 0.76
 4 -6 10 10.46 0.83
 4 6 -10 7.24 0.97
 4 6 -10 9.09 0.84
 -4 6 10 9.07 0.82
 -4 6 10 7.96 0.69
 -4 -6 -10 8.26 0.68
 -4 6 -10 9.97 1.12
 -4 6 -10 9.21 0.86
 -4 -6 10 11.02 0.9
 4 -6 -10 9.28 0.78
 4 -6 -10 6.49 0.84
 5 6 -10 0.57 0.53
 5 6 -10 0.4 0.32
 -5 6 10 0.26 0.31
 -5 -6 -10 -0.14 0.24
 -5 -6 10 0.05 0.29
 -5 6 -10 -0.3 0.32
 -5 6 -10 0.18 0.34
 5 -6 -10 0.04 0.29
 -6 -6 -10 3.7 0.65
 6 6 -10 3.92 0.89
 -6 -6 10 2.54 0.65
 -6 6 -10 2.69 0.7
 -6 6 -10 2.07 0.66
 6 -6 -10 2.97 0.7
 0 7 10 9.22 0.4
 0 7 -10 9.48 0.75
 0 -7 -10 10.12 0.44
 0 7 -10 7.98 0.73
 0 -7 -10 9.54 0.47
 0 7 -10 8.65 0.71
 0 -7 10 9.21 0.75
 -1 -7 -10 7.56 0.37
 -1 -7 -10 7.24 0.38
 -1 7 10 7.3 0.4
 -1 7 10 7.29 0.43
 -1 -7 -10 7.21 0.36
 1 7 -10 8.38 0.88
 1 7 -10 7.95 0.68
 1 -7 10 6.42 0.76
 -1 7 -10 7.45 0.81
 1 -7 -10 7.61 0.51
 -1 -7 10 7.58 0.69
 -1 7 -10 7.37 0.67
 1 -7 -10 7.43 0.46
 -1 -7 10 6.45 0.61
 -1 7 -10 7.53 0.66
 -2 7 10 23.39 1.05
 -2 -7 -10 25.12 0.94
 -2 -7 -10 23.28 0.9
 2 -7 10 21.87 1.22
 -2 7 10 25.67 0.99
 2 7 -10 23.1 1.36
 2 -7 10 20.91 1.26
 2 7 -10 23.9 1.25
 -2 -7 -10 21.85 0.87
 -2 7 -10 24.71 1.25
 -2 7 -10 23.15 1.32
 2 -7 -10 23.35 1.02
 -2 -7 10 21.58 1.19
 -2 -7 10 23.82 1.32
 2 -7 -10 23.87 1.12
 -3 7 10 8.68 0.71
 -3 -7 -10 8.87 0.58
 -3 7 10 8.1 0.61
 3 -7 10 7.94 0.71
 3 7 -10 10.38 0.83
 3 7 -10 9.66 1.1
 -3 -7 -10 9.35 0.65
 3 -7 -10 7.61 0.72
 -3 7 -10 9.55 0.9
 -3 -7 10 9.36 0.78
 -3 7 -10 8.46 0.78
 3 -7 -10 8.21 0.66
 4 7 -10 38.11 2.03
 -4 7 10 37.89 1.63
 -4 7 10 39.91 1.83
 4 7 -10 42.04 1.89
 4 -7 10 39.09 1.77
 -4 -7 -10 37.61 1.55
 -4 7 -10 38.39 1.96
 -4 7 -10 39.58 1.86
 4 -7 -10 36.51 1.8
 -4 -7 10 38.71 1.82
 4 -7 -10 39.2 1.7
 -5 -7 -10 3.02 0.52
 5 7 -10 3.23 0.74
 5 -7 -10 3.66 0.7
 -5 7 -10 3.47 0.7
 -5 -7 10 3.22 0.64
 -5 7 -10 3.09 0.71
 -6 -7 -10 3.61 0.64
 6 7 -10 4.88 1.01
 -6 7 -10 3.88 0.79
 -6 7 -10 3.54 0.71
 -6 -7 10 4.72 0.81
 6 -7 -10 3.93 0.83
 0 8 -10 6.01 0.72
 0 -8 -10 5.89 0.32
 0 -8 -10 5.81 0.3
 0 8 -10 8.08 0.81
 0 8 -10 6.72 0.76
 0 -8 10 6.83 0.63
 1 -8 10 58.81 2.32
 -1 8 10 56.91 1.76
 1 8 -10 54.95 2.29
 -1 -8 -10 59.05 1.62
 -1 8 10 59.73 1.68
 -1 -8 -10 57.27 1.62
 -1 -8 -10 59.38 1.62
 1 8 -10 62.66 2.24
 -1 -8 10 57.71 2.17
 -1 8 -10 62.55 2.23
 1 -8 -10 59.57 1.86
 -1 -8 10 59.99 2.33
 1 -8 -10 60.06 1.8
 -1 8 -10 57.66 2.3
 -1 8 -10 57.83 2.19
 -2 8 10 18.65 0.81
 -2 -8 -10 18.93 0.77
 -2 8 10 17.53 0.88
 2 -8 10 18.08 1.14
 -2 -8 -10 18.67 0.74
 2 8 -10 20.78 1.15
 -2 -8 -10 17.88 0.72
 2 8 -10 19.12 1.24
 2 -8 -10 18.25 0.94
 2 -8 -10 18.08 0.86
 -2 8 -10 19.96 1.21
 -2 -8 10 18.75 1.1
 -2 8 -10 18.47 1.1
 3 8 -10 16.21 1.06
 3 -8 10 16.32 1.03
 3 8 -10 16.4 1.21
 -3 -8 -10 14.19 0.74
 -3 8 10 15.15 0.93
 -3 8 10 15.42 0.83
 -3 -8 -10 15.52 0.83
 -3 -8 10 13.84 0.99
 3 -8 -10 15.56 0.97
 3 -8 -10 14.88 0.87
 -3 8 -10 14.04 1.01
 -3 8 -10 13.78 1.07
 -4 -8 -10 1.68 0.36
 4 8 -10 2.1 0.63
 -4 8 10 1.89 0.4
 4 8 -10 1.45 0.42
 4 -8 10 2.02 0.51
 -4 8 10 1.54 0.44
 -4 -8 10 2.17 0.53
 -4 8 -10 2.02 0.62
 -4 8 -10 1.79 0.48
 4 -8 -10 1.46 0.44
 4 -8 -10 1.11 0.34
 -5 -8 -10 8.25 0.76
 5 8 -10 9.41 1.21
 5 -8 -10 10.07 1.11
 -5 8 -10 9.85 1.09
 -5 -8 10 10.5 1.13
 -5 8 -10 11.7 1.34
 6 8 -10 6.36 1.18
 -6 -8 -10 5.19 0.76
 -6 -8 10 5.57 0.86
 -6 8 -10 4.86 0.92
 -6 8 -10 4.64 0.88
 6 -8 -10 7.76 1.06
 0 9 -10 9.46 0.78
 0 9 -10 11.43 0.83
 0 9 -10 10.19 0.85
 -1 9 10 32.79 1.08
 1 9 -10 32.59 1.53
 -1 9 10 35.26 1
 1 9 -10 32.61 1.64
 -1 -9 10 34.76 1.54
 1 -9 -10 32.64 1.15
 -1 9 -10 35.46 1.56
 -1 9 -10 33.49 1.54
 -1 9 -10 35.47 1.68
 1 -9 -10 32.89 1.12
 2 9 -10 17.76 1.11
 2 9 -10 15.16 1.16
 2 -9 10 18.52 1.19
 -2 9 10 18.69 0.79
 -2 9 10 18.55 0.87
 -2 -9 -10 18.38 0.69
 -2 -9 -10 18.97 0.69
 -2 -9 -10 19.39 0.73
 2 -9 -10 18.74 0.92
 -2 9 -10 16.73 1.16
 -2 9 -10 19.06 1.13
 -2 -9 10 17.78 1.09
 2 -9 -10 18.8 0.86
 3 -9 10 27.16 1.43
 -3 9 10 29.17 1.34
 3 9 -10 29.44 1.66
 -3 -9 -10 29.98 1.2
 3 9 -10 31.53 1.54
 -3 9 10 30.07 1.22
 -3 -9 -10 27.38 1.09
 -3 9 -10 26.76 1.55
 3 -9 -10 26.89 1.25
 -3 -9 10 26.33 1.43
 3 -9 -10 28.27 1.35
 -3 9 -10 28.94 1.5
 -4 -9 -10 1.08 0.31
 4 9 -10 1.05 0.49
 4 -9 10 0.66 0.39
 4 -9 -10 0.42 0.29
 -4 -9 10 1.28 0.46
 -4 9 -10 1.24 0.48
 4 -9 -10 0.55 0.33
 -4 9 -10 0.94 0.44
 5 9 -10 11.17 1.35
 -5 -9 -10 11.17 0.84
 -5 -9 10 11.78 1.26
 -5 9 -10 13.82 1.14
 -5 9 -10 12.72 1.19
 5 -9 -10 12.16 1.03
 -6 -9 -10 1.61 0.47
 6 9 -10 1.41 0.6
 -6 9 -10 1.51 0.62
 -6 -9 10 1.72 0.55
 0 10 -10 17.54 1.06
 0 10 -10 17.01 1.13
 0 10 -10 16.13 1.02
 1 10 -10 0.24 0.31
 1 10 -10 1.25 0.38
 -1 10 10 0.7 0.14
 -1 10 -10 1.67 0.41
 1 -10 -10 1.14 0.19
 -1 -10 10 1.12 0.38
 -1 10 -10 0.63 0.36
 -1 10 -10 0.85 0.35
 -2 -10 -10 0.55 0.1
 -2 10 10 0.82 0.2
 2 10 -10 0.33 0.26
 2 10 -10 0.25 0.3
 -2 -10 -10 0.47 0.12
 -2 10 -10 0.51 0.39
 2 -10 -10 0.56 0.21
 -2 10 -10 0.08 0.25
 -2 -10 10 0.47 0.34
 2 -10 -10 0.37 0.19
 -3 -10 -10 12.8 0.7
 -3 10 10 13.54 0.75
 3 -10 10 11.72 0.92
 -3 10 10 12.53 0.82
 -3 -10 -10 13.05 0.65
 3 10 -10 12.43 1.08
 -3 -10 10 11.26 0.94
 -3 10 -10 11.6 1.06
 3 -10 -10 11.58 0.81
 -3 10 -10 11.34 0.95
 3 -10 -10 11.36 0.76
 -4 -10 -10 7.15 0.59
 4 10 -10 7.33 1.1
 4 -10 10 6.05 0.79
 -4 10 -10 8.24 0.97
 -4 10 -10 8.69 1.13
 -4 -10 10 7.05 0.88
 4 -10 -10 7.88 0.85
 -5 -10 -10 4.98 0.62
 5 10 -10 5.84 0.99
 -5 10 -10 5.34 0.97
 -5 -10 10 6.23 0.92
 -5 10 -10 4.93 0.87
 0 11 -10 4.73 0.64
 0 11 -10 3.87 0.68
 0 11 -10 2.46 0.49
 1 11 -10 2.27 0.5
 1 11 -10 2.63 0.62
 -1 11 -10 2.44 0.51
 -1 11 -10 2.13 0.57
 1 -11 -10 2.39 0.24
 -1 11 -10 1.28 0.4
 -1 -11 10 1.66 0.45
 -2 11 10 1.02 0.21
 -2 11 10 0.48 0.2
 2 11 -10 1.27 0.45
 -2 -11 10 0.81 0.37
 -2 11 -10 0.73 0.33
 2 -11 -10 0.63 0.21
 -2 11 -10 1.02 0.38
 -2 11 -10 1.02 0.44
 3 -11 10 1.63 0.46
 3 11 -10 0.39 0.42
 -3 -11 -10 1.16 0.25
 -3 11 10 0.88 0.26
 -3 -11 -10 1.28 0.25
 -3 -11 10 1.08 0.41
 3 -11 -10 1.31 0.32
 -3 11 -10 1.88 0.55
 3 -11 -10 1.16 0.32
 -3 11 -10 0.92 0.38
 -4 -11 -10 6.29 0.54
 4 11 -10 6.58 1.01
 -4 11 -10 5.18 0.88
 -4 11 -10 4.94 0.76
 -4 -11 10 4.67 0.72
 -5 -11 -10 7.17 0.67
 5 11 -10 7.08 1.15
 -5 11 -10 5.83 0.95
 -5 -11 10 5.78 0.87
 0 12 -10 14.18 1
 0 12 -10 14.34 1.08
 1 12 -10 2.3 0.59
 1 12 -10 1.74 0.47
 -1 12 -10 2.14 0.55
 -1 12 -10 2.43 0.52
 1 -12 -10 2.41 0.24
 2 12 -10 7.04 0.97
 -2 12 10 7.26 0.5
 2 -12 -10 7.04 0.49
 -2 12 -10 6.27 0.91
 -2 -12 10 5.54 0.72
 -2 12 -10 6.25 0.79
 3 12 -10 8.29 1.09
 -3 -12 -10 8.8 0.49
 -3 -12 -10 9.37 0.51
 -3 12 10 9.81 0.61
 -3 12 -10 8.38 1.05
 -3 -12 10 10.12 0.91
 -3 12 -10 8.63 0.97
 3 -12 -10 9 0.66
 -4 -12 -10 8.01 0.59
 4 12 -10 9.62 1.24
 -4 -12 10 7.44 0.91
 -4 12 -10 9.75 1.21
 -5 -12 -10 15.76 0.95
 5 12 -10 13.91 1.64
 -5 12 -10 15.68 1.4
 0 13 -10 1.47 0.42
 0 13 -10 0.9 0.44
 1 13 -10 6.3 0.79
 1 13 -10 6.22 0.89
 -1 13 -10 5.48 0.72
 1 -13 -10 6.66 0.34
 -1 13 -10 5.2 0.82
 -2 13 10 2.73 0.34
 2 13 -10 2.25 0.58
 -2 13 -10 1.32 0.48
 -2 -13 10 3.1 0.59
 2 -13 -10 2.28 0.33
 -2 13 -10 2.28 0.51
 3 13 -10 1.41 0.58
 -3 -13 -10 0.91 0.19
 -3 13 -10 0.6 0.46
 -3 -13 10 1.17 0.44
 3 -13 -10 1.26 0.32
 4 13 -10 5.96 1.02
 -4 -13 -10 6.3 0.52
 -4 -13 10 7.03 0.95
 -4 13 -10 5.19 0.91
 -5 13 -10 9.86 1.27
 0 14 -10 10.29 1.21
 0 14 -10 7.02 0.98
 1 14 -10 -0.05 0.34
 1 -14 -10 0.41 0.12
 -1 14 -10 0.07 0.36
 2 14 -10 2.74 0.68
 -2 14 10 1.52 0.25
 -2 -14 10 1.77 0.49
 2 -14 -10 1.3 0.26
 -2 14 -10 1.71 0.52
 -3 -14 -10 4.5 0.3
 3 14 -10 4.63 0.88
 3 -14 -10 4.18 0.51
 -3 14 -10 5.36 0.89
 -3 -14 10 5.01 0.77
 4 14 -10 14.94 1.39
 -4 -14 -10 15.76 0.8
 -4 14 -10 16.83 1.41
 -4 -14 10 14.12 1.18
 0 15 -10 0.56 0.41
 1 15 -10 0.38 0.38
 -1 15 -10 0.46 0.4
 -2 15 10 0.81 0.2
 2 15 -10 1.28 0.55
 -2 -15 10 0.43 0.34
 -2 15 -10 1.64 0.58
 2 -15 -10 0.95 0.23
 3 15 -10 1.34 0.56
 -3 15 10 1.17 0.34
 -3 -15 10 1.93 0.53
 -3 15 -10 1.72 0.59
 -4 -15 -10 0.94 0.25
 4 15 -10 1.04 0.57
 -4 15 -10 0.12 0.36
 -4 -15 10 0.25 0.36
 0 16 -10 12.35 1.13
 1 16 -10 0.71 0.53
 -1 16 -10 0.94 0.45
 2 16 -10 0.66 0.51
 2 -16 -10 0.92 0.24
 -2 16 -10 0.5 0.48
 -3 16 10 0.34 0.21
 3 16 -10 -0.12 0.4
 -3 16 -10 0.2 0.4
 -3 -16 10 0.42 0.39
 0 17 -10 3.22 0.7
 1 17 -10 3.98 0.83
 -1 17 -10 4.75 0.91
 2 17 -10 3.61 0.84
 -2 17 -10 1.35 0.58
 2 -17 -10 2.69 0.36
 0 18 -10 7.18 1.06
 1 18 -10 1.38 0.55
 -1 18 -10 1.91 0.65
 0 0 -11 0.16 0.17
 0 0 11 0.22 0.21
 0 0 -11 0.04 0.2
 1 0 -11 0.44 0.22
 1 0 -11 0.22 0.25
 1 0 11 -0.01 0.19
 -1 0 -11 0.31 0.24
 -1 0 11 0.11 0.16
 -1 0 -11 0.34 0.21
 -1 0 -11 0.33 0.2
 -1 0 11 0.21 0.23
 -2 0 -11 0.19 0.21
 2 0 -11 0.1 0.21
 -2 0 11 0.2 0.26
 -2 0 -11 -0.13 0.19
 -2 0 11 -0.01 0.13
 2 0 -11 0.25 0.28
 2 0 11 0.02 0.15
 -3 0 -11 33.82 1.47
 3 0 -11 33.92 1.69
 -3 0 11 33.82 1.61
 -3 0 -11 35.01 1.58
 -3 0 11 34.28 1.49
 3 0 -11 33.45 1.52
 -4 0 -11 1.17 0.37
 -4 0 11 0.9 0.34
 4 0 -11 2.26 0.61
 -4 0 11 1.41 0.48
 4 0 -11 1.74 0.43
 -4 0 -11 1.28 0.39
 -5 0 11 0.13 0.29
 5 0 -11 0.56 0.46
 -5 0 -11 0.13 0.33
 6 0 -11 16.23 1.44
 -6 0 -11 19.25 1.35
 0 -1 -11 6.11 0.53
 0 1 11 5.36 0.48
 0 1 -11 5.21 0.49
 0 -1 11 4.87 0.56
 0 1 -11 4.96 0.56
 0 -1 -11 5.59 0.46
 -1 -1 -11 11.3 0.71
 1 1 -11 12.81 0.76
 1 1 -11 12.11 0.83
 -1 1 11 12.04 0.68
 1 -1 11 10.95 0.76
 -1 -1 -11 12.47 0.7
 -1 -1 -11 10.91 0.65
 -1 1 11 11.88 0.75
 1 -1 -11 12.98 0.73
 -1 -1 11 11.34 0.69
 1 -1 -11 12.83 0.8
 -1 1 -11 10.57 0.75
 -1 1 -11 11.5 0.72
 -1 -1 11 12.88 0.81
 1 1 11 11.93 0.73
 -1 1 -11 12.41 0.73
 -2 -1 -11 6.98 0.6
 2 1 -11 6.44 0.77
 -2 1 11 6.59 0.54
 2 1 -11 6.62 0.61
 -2 -1 -11 7.16 0.57
 -2 1 11 7.21 0.64
 2 -1 11 7.11 0.59
 2 1 11 7.41 0.57
 -2 1 -11 6.96 0.65
 -2 -1 11 6.93 0.59
 2 -1 -11 7.08 0.6
 -2 1 -11 7.48 0.61
 2 -1 -11 7.05 0.76
 -2 -1 11 7.06 0.64
 -3 1 11 10.02 0.73
 3 1 -11 9.67 0.9
 3 1 -11 10.12 0.79
 -3 -1 -11 9.26 0.72
 -3 -1 -11 10.95 0.81
 -3 1 11 7.67 0.84
 -3 1 -11 9.46 0.8
 3 -1 -11 8.67 0.82
 -3 -1 11 8.52 0.72
 -3 -1 11 11.05 0.89
 -3 1 -11 9.89 0.76
 3 -1 -11 9.37 0.76
 -4 1 11 1.59 0.42
 -4 -1 -11 2.09 0.45
 -4 1 11 1.72 0.55
 4 1 -11 0.67 0.43
 -4 -1 -11 1.82 0.47
 4 1 -11 1.52 0.42
 4 -1 -11 1.83 0.53
 -4 1 -11 1.5 0.42
 -4 -1 11 1.81 0.47
 -4 -1 11 1.78 0.43
 4 -1 -11 2.33 0.46
 -4 1 -11 2.48 0.54
 5 1 -11 13.28 1.09
 5 1 -11 13.88 1.22
 -5 1 11 13.88 1.04
 -5 -1 -11 13.71 1.03
 -5 1 -11 14.5 1.14
 -5 -1 11 12.23 1.01
 5 -1 -11 13.81 1.21
 -5 1 -11 13.89 1.05
 6 1 -11 -0.01 0.43
 -6 -1 -11 -0.14 0.31
 6 -1 -11 0.23 0.4
 -6 1 -11 0.31 0.39
 0 2 -11 27.08 1.18
 0 2 11 28.51 1.14
 0 -2 -11 25.75 1.12
 0 -2 -11 28.12 1.1
 0 2 -11 25.78 1.23
 0 -2 11 27.21 1.25
 -1 -2 -11 11.45 0.65
 -1 2 11 12.84 0.74
 -1 2 11 12.9 0.69
 1 2 -11 12.81 0.86
 1 2 -11 13.41 0.8
 -1 -2 -11 11.69 0.7
 -1 -2 -11 11.92 0.67
 1 -2 11 11.62 0.81
 1 2 11 12.18 0.71
 -1 -2 11 12.61 0.84
 -1 -2 11 13.58 0.78
 -1 2 -11 12.4 0.83
 -1 2 -11 12.46 0.77
 -1 2 -11 12.6 0.75
 1 -2 -11 13.28 0.82
 1 -2 -11 12.84 0.72
 -2 -2 -11 0.97 0.26
 -2 -2 -11 0.72 0.27
 2 -2 11 1.26 0.33
 -2 2 11 0.66 0.24
 -2 2 11 0.56 0.26
 2 2 -11 1.14 0.37
 2 2 -11 0.58 0.29
 -2 2 -11 0.73 0.31
 -2 -2 11 0.77 0.36
 2 -2 -11 0.67 0.27
 2 -2 -11 0.66 0.31
 -2 -2 11 0.87 0.28
 -2 2 -11 1.29 0.36
 3 2 -11 21.36 1.17
 -3 -2 -11 21.6 1.14
 -3 2 11 21.88 1.21
 3 2 -11 20.45 1.31
 -3 -2 -11 21.67 1.06
 -3 -2 11 20.6 1.26
 3 -2 -11 20.24 1.24
 -3 -2 11 18.95 1.1
 3 -2 -11 20.04 1.11
 -3 2 -11 20.73 1.14
 -3 2 -11 20.43 1.2
 -4 2 11 7.73 0.94
 4 2 -11 7.53 0.86
 4 2 -11 8.01 1.02
 -4 2 11 7.31 0.69
 -4 -2 -11 5.37 0.65
 -4 -2 -11 6.54 0.77
 4 -2 -11 7.68 0.85
 -4 2 -11 8.47 0.97
 4 -2 -11 8.42 1.01
 -4 2 -11 5.98 0.72
 -4 -2 11 8.17 0.75
 5 2 -11 4.76 0.87
 -5 -2 -11 4.89 0.71
 5 2 -11 5.11 0.76
 -5 2 11 4.89 0.72
 -5 2 -11 7.01 0.91
 -5 -2 11 3.42 0.6
 5 -2 -11 4.62 0.83
 -5 2 -11 4.9 0.77
 6 2 -11 1.51 0.65
 -6 -2 -11 1.95 0.59
 6 -2 -11 3.01 0.81
 -6 2 -11 1.88 0.54
 0 3 -11 16.63 0.98
 0 -3 -11 16.27 0.77
 0 -3 -11 17.02 0.84
 0 3 11 16.74 0.8
 0 3 -11 17.23 0.91
 0 -3 11 15.94 0.94
 1 3 -11 10.91 0.74
 -1 -3 -11 10.74 0.61
 -1 -3 -11 11.69 0.67
 1 -3 11 10.19 0.78
 -1 3 11 10.39 0.66
 -1 -3 -11 11.91 0.61
 1 3 -11 11.6 0.83
 -1 3 11 10.7 0.6
 1 3 11 10.68 0.63
 -1 3 -11 9.64 0.71
 -1 3 -11 10.47 0.71
 1 -3 -11 9.97 0.63
 1 -3 -11 11.24 0.73
 -1 3 -11 10.78 0.79
 -1 -3 11 11.61 0.8
 -1 -3 11 10.92 0.72
 -2 -3 -11 0.96 0.27
 2 -3 11 1.11 0.33
 -2 3 11 1.67 0.32
 -2 3 11 1.51 0.36
 -2 -3 -11 1.86 0.35
 2 3 -11 1.23 0.41
 2 3 -11 1.47 0.37
 -2 -3 11 1.79 0.38
 -2 3 -11 1.38 0.41
 -2 3 -11 0.88 0.32
 2 -3 -11 1.31 0.31
 -2 -3 11 2.66 0.52
 2 -3 -11 1.99 0.44
 3 3 -11 11.54 0.98
 -3 -3 -11 12.61 0.77
 -3 3 11 11.02 0.85
 -3 -3 -11 10.71 0.78
 -3 3 11 10.51 0.73
 3 3 -11 11.62 0.87
 3 -3 11 10.32 0.77
 3 -3 -11 10.94 0.8
 -3 -3 11 11.57 0.84
 -3 3 -11 12.28 0.95
 -3 -3 11 11.54 0.93
 -3 3 -11 12.36 0.87
 3 -3 -11 13 0.97
 4 3 -11 5.3 0.86
 -4 -3 -11 4.66 0.59
 -4 -3 -11 4.84 0.66
 4 3 -11 4.8 0.7
 -4 3 11 4.23 0.67
 -4 3 -11 4.23 0.67
 4 -3 -11 4.71 0.64
 -4 -3 11 4.3 0.62
 4 -3 -11 6.77 0.93
 -4 3 -11 4.47 0.72
 -5 3 11 -0.22 0.25
 -5 -3 -11 -0.23 0.24
 5 3 -11 0.31 0.44
 5 3 -11 0.17 0.35
 -5 -3 11 0.24 0.33
 -5 3 -11 -0.15 0.27
 5 -3 -11 0.11 0.37
 -5 3 -11 0.25 0.35
 6 3 -11 0.27 0.52
 -6 -3 -11 0.54 0.41
 6 -3 -11 -0.56 0.32
 -6 3 -11 0.74 0.45
 -6 3 -11 1.37 0.53
 0 4 -11 0.3 0.27
 0 4 -11 0.2 0.22
 0 -4 -11 -0.05 0.13
 0 4 -11 -0.08 0.18
 0 4 11 0 0.14
 0 -4 -11 0.15 0.18
 0 -4 11 0.3 0.23
 -1 4 11 19.74 0.92
 -1 4 11 19.61 0.85
 -1 -4 -11 20.42 0.9
 1 -4 11 21.35 1.15
 -1 -4 -11 19.26 0.83
 1 4 -11 19.88 1.05
 1 4 -11 19.83 1.15
 -1 -4 -11 20.43 0.85
 1 -4 -11 19.04 0.97
 -1 4 -11 18.71 1.09
 -1 -4 11 22.72 1.18
 1 -4 -11 21.72 0.92
 -1 4 -11 22.42 1.1
 -1 4 -11 21.33 1.06
 -1 -4 11 21.34 1.05
 -2 4 11 0.35 0.22
 2 4 -11 0.21 0.26
 2 4 -11 -0.17 0.22
 -2 -4 -11 0.29 0.18
 -2 -4 -11 0.02 0.17
 -2 4 11 0.07 0.16
 2 -4 11 -0.07 0.17
 2 -4 -11 -0.06 0.23
 -2 -4 11 -0.17 0.21
 2 -4 -11 -0.19 0.16
 -2 4 -11 0.31 0.25
 -2 4 -11 0.06 0.27
 -2 -4 11 0.11 0.23
 3 4 -11 22.48 1.41
 -3 -4 -11 24.08 1.16
 -3 -4 -11 22.69 1.08
 3 -4 11 27.76 1.27
 3 4 -11 23.26 1.26
 -3 4 11 23.14 1.12
 -3 4 11 21.78 1.23
 3 -4 -11 27.97 1.4
 -3 -4 11 22.27 1.23
 -3 -4 11 24.97 1.37
 -3 4 -11 22.6 1.24
 3 -4 -11 21.72 1.15
 -3 4 -11 23.1 1.34
 4 4 -11 11.02 1.24
 4 4 -11 11.42 0.94
 -4 -4 -11 9.12 0.74
 -4 4 11 11.24 0.92
 -4 4 11 11.46 0.83
 -4 4 -11 11.13 0.92
 -4 -4 11 9.96 0.86
 4 -4 -11 8.2 0.99
 4 -4 -11 10.37 0.86
 -4 4 -11 11.98 1
 -5 4 11 13.87 1.16
 5 4 -11 15.1 1.34
 5 4 -11 13.66 1.11
 -5 -4 -11 13.93 1
 -5 4 -11 11.72 1.08
 -5 -4 11 14.35 1.09
 -5 4 -11 14.53 1.12
 5 -4 -11 12.37 1.14
 -6 -4 -11 -0.18 0.31
 6 4 -11 0.16 0.49
 -6 4 -11 0.08 0.35
 -6 4 -11 0.21 0.36
 6 -4 -11 -0.22 0.3
 0 5 -11 3.7 0.56
 0 -5 -11 3.94 0.35
 0 5 -11 5.44 0.63
 0 5 -11 3.65 0.54
 0 -5 -11 3.69 0.41
 0 -5 11 2.98 0.5
 -1 -5 -11 8.83 0.53
 1 5 -11 8.43 0.76
 -1 -5 -11 8.81 0.5
 -1 5 11 7.91 0.53
 -1 5 11 8.25 0.49
 -1 -5 -11 8.67 0.48
 1 5 -11 9.25 0.72
 1 -5 11 9.54 0.79
 1 -5 -11 7.77 0.53
 -1 5 -11 7.54 0.7
 -1 5 -11 8.4 0.7
 -1 -5 11 8.03 0.66
 -1 5 -11 8.52 0.68
 -1 -5 11 9.22 0.75
 1 -5 -11 7.57 0.59
 -2 5 11 1.21 0.27
 -2 -5 -11 0.84 0.22
 -2 -5 -11 0.6 0.24
 -2 5 11 0.88 0.28
 2 -5 11 0.38 0.26
 2 -5 11 0.81 0.34
 2 5 -11 1.16 0.35
 2 5 -11 1.08 0.41
 -2 5 -11 0.64 0.35
 -2 5 -11 1.09 0.35
 -2 -5 11 0.85 0.29
 2 -5 -11 0.72 0.28
 -2 -5 11 0.66 0.34
 2 -5 -11 0.62 0.26
 -3 5 11 7.52 0.6
 -3 5 11 8.07 0.71
 -3 -5 -11 7.55 0.62
 3 5 -11 7.49 0.95
 3 5 -11 7.07 0.8
 -3 -5 -11 6.61 0.55
 3 -5 11 7.89 0.81
 -3 -5 -11 6.94 0.59
 -3 5 -11 7.29 0.85
 -3 -5 11 5.65 0.69
 3 -5 -11 7.36 0.64
 3 -5 -11 6.19 0.77
 -3 5 -11 6.86 0.79
 -4 -5 -11 2.98 0.48
 -4 5 11 2.27 0.44
 -4 5 11 3.4 0.6
 4 5 -11 2.26 0.62
 4 5 -11 2.79 0.58
 4 -5 -11 2.63 0.61
 4 -5 -11 3.14 0.54
 -4 5 -11 2.35 0.56
 -4 5 -11 3.16 0.58
 -4 -5 11 3.37 0.62
 -5 -5 -11 13.07 0.97
 -5 5 11 17.13 1.25
 5 5 -11 13.81 1.51
 5 5 -11 15.99 1.19
 -5 -5 11 14.24 1.1
 -5 5 -11 14.77 1.16
 5 -5 -11 13.79 1.19
 -5 5 -11 15.37 1.25
 6 5 -11 1.8 0.62
 -6 -5 -11 1.57 0.48
 -6 5 -11 1.76 0.56
 6 -5 -11 0.95 0.53
 -6 5 -11 2.02 0.7
 0 6 -11 3.52 0.53
 0 6 -11 2.93 0.51
 0 -6 -11 3.41 0.31
 0 6 -11 2.89 0.48
 0 -6 11 3.26 0.56
 0 6 11 3.13 0.32
 0 -6 -11 3.32 0.37
 -1 6 11 25.19 0.91
 1 6 -11 25.23 1.24
 -1 -6 -11 23.65 0.87
 -1 -6 -11 23.48 0.92
 -1 6 11 23.01 0.96
 1 6 -11 24.79 1.34
 -1 -6 -11 23.14 0.88
 1 -6 11 24.74 1.31
 -1 -6 11 24.66 1.2
 -1 6 -11 23.72 1.3
 -1 -6 11 24.33 1.29
 -1 6 -11 24.17 1.23
 1 -6 -11 24.61 0.97
 1 -6 -11 23.09 1.04
 -1 6 -11 25.66 1.22
 2 -6 11 6.94 0.81
 -2 -6 -11 6.13 0.43
 2 6 -11 5.4 0.79
 2 6 -11 6.55 0.78
 2 -6 11 5.09 0.68
 -2 6 11 5.17 0.56
 -2 6 11 5.82 0.46
 -2 -6 -11 6.11 0.45
 2 -6 -11 6.05 0.52
 -2 6 -11 6.46 0.75
 -2 6 -11 5.64 0.76
 -2 -6 11 6.69 0.79
 -2 -6 11 6.77 0.74
 2 -6 -11 5.89 0.64
 -3 -6 -11 30.09 1.24
 -3 6 11 31.83 1.34
 -3 -6 -11 30.76 1.3
 -3 -6 -11 33.69 1.35
 -3 6 11 30.16 1.43
 3 -6 11 32.21 1.49
 3 6 -11 30.52 1.68
 3 6 -11 30.92 1.53
 -3 -6 11 29.74 1.5
 -3 6 -11 30.4 1.61
 3 -6 -11 31.03 1.39
 3 -6 -11 29.49 1.5
 -3 6 -11 30.62 1.53
 4 6 -11 9.4 0.85
 -4 6 11 7.97 0.91
 -4 -6 -11 8.93 0.69
 4 6 -11 10.43 1.26
 -4 6 11 8.12 0.71
 4 -6 -11 7.26 0.93
 4 -6 -11 7.63 0.72
 -4 6 -11 8.75 0.98
 -4 6 -11 6.36 0.9
 -4 -6 11 6.71 0.82
 -5 -6 -11 5.15 0.67
 5 6 -11 4.41 0.85
 5 6 -11 5.85 0.85
 -5 6 -11 3.96 0.75
 -5 -6 11 4.12 0.71
 -5 6 -11 3.54 0.67
 5 -6 -11 4.46 0.81
 6 6 -11 0.31 0.45
 -6 -6 -11 1.24 0.45
 6 -6 -11 2.11 0.65
 -6 -6 11 1.76 0.51
 -6 6 -11 1.9 0.59
 -6 6 -11 1.55 0.64
 0 7 -11 10.93 0.8
 0 7 -11 11.09 0.89
 0 -7 -11 10.52 0.5
 0 -7 11 9.92 0.82
 0 7 -11 10.99 0.81
 0 7 11 9.63 0.47
 0 -7 -11 10.81 0.54
 -1 7 11 40.33 1.24
 -1 -7 -11 36.87 1.21
 1 -7 11 39.81 1.76
 1 7 -11 39.17 1.66
 -1 -7 -11 36.33 1.19
 -1 -7 -11 38.1 1.19
 1 7 -11 39.51 1.79
 -1 7 -11 38.58 1.64
 1 -7 -11 37.28 1.31
 -1 7 -11 38.31 1.65
 1 -7 -11 37.33 1.39
 -1 -7 11 36.83 1.61
 -1 7 -11 36.61 1.72
 -1 -7 11 36.04 1.7
 2 7 -11 11.64 0.97
 -2 7 11 12.57 0.73
 -2 -7 -11 13.07 0.64
 -2 7 11 11.05 0.63
 -2 -7 -11 12.07 0.61
 2 7 -11 12.18 0.9
 2 -7 11 10.56 0.89
 -2 -7 -11 10.52 0.57
 2 -7 -11 11.6 0.7
 -2 7 -11 12.67 0.91
 -2 -7 11 12.32 0.88
 2 -7 -11 10.5 0.76
 -2 7 -11 10.78 0.9
 3 -7 11 24.19 1.28
 3 7 -11 19.91 1.24
 -3 7 11 22.12 1.18
 -3 -7 -11 22.74 1.02
 -3 -7 -11 23.57 1.07
 -3 7 11 24.39 1.11
 3 7 -11 20.34 1.39
 -3 -7 -11 25.61 1.12
 3 -7 -11 22.05 1.25
 -3 7 -11 22.83 1.31
 -3 -7 11 22.71 1.29
 3 -7 -11 23.51 1.15
 -3 7 -11 25.09 1.45
 -4 7 11 9.45 0.75
 4 -7 11 11.14 0.89
 4 7 -11 8.11 0.95
 -4 7 11 10.14 0.86
 4 7 -11 9.36 1.17
 -4 -7 -11 9.76 0.71
 -4 -7 11 8.85 0.84
 -4 7 -11 9.49 1.03
 4 -7 -11 10.02 0.91
 4 -7 -11 9.28 0.79
 -4 7 -11 8.38 1.02
 5 7 -11 11.95 1.43
 -5 -7 -11 12.64 0.92
 -5 7 -11 13.82 1.22
 5 -7 -11 12.97 1.15
 -5 -7 11 13.97 1.12
 -5 7 -11 14.45 1.15
 -6 -7 -11 4.38 0.68
 6 7 -11 2.65 0.76
 6 -7 -11 4 0.78
 -6 7 -11 3.34 0.71
 -6 7 -11 3.2 0.81
 -6 -7 11 4.75 0.85
 0 -8 -11 6.41 0.35
 0 8 -11 5.92 0.69
 0 8 -11 7.41 0.84
 0 8 -11 7.53 0.79
 0 -8 -11 6.93 0.38
 0 -8 -11 6.83 0.37
 -1 -8 -11 43.98 1.29
 1 8 -11 42.42 1.8
 -1 -8 -11 42.2 1.27
 -1 8 11 44.76 1.31
 -1 8 11 42.72 1.39
 -1 -8 -11 42.03 1.28
 1 8 -11 44.52 1.98
 -1 -8 11 39.45 1.74
 1 -8 -11 45 1.43
 -1 8 -11 42.51 1.8
 -1 8 -11 40.23 1.89
 -1 8 -11 44.42 1.82
 1 -8 -11 43.73 1.5
 -2 8 11 2.1 0.36
 -2 -8 -11 2.12 0.27
 2 8 -11 2.41 0.49
 -2 -8 -11 1.72 0.25
 -2 -8 -11 2.32 0.29
 2 8 -11 2.3 0.59
 -2 8 11 2.16 0.31
 -2 -8 11 1.46 0.39
 2 -8 -11 2.18 0.39
 -2 8 -11 1.33 0.46
 -2 8 -11 1.96 0.44
 2 -8 -11 2.31 0.36
 -3 8 11 45.83 1.84
 3 8 -11 45.62 2
 -3 -8 -11 44.79 1.59
 -3 8 11 47.57 1.72
 -3 -8 -11 47.16 1.65
 3 8 -11 44.18 2.16
 -3 -8 -11 48.71 1.72
 3 -8 11 47.92 1.98
 -3 8 -11 46.27 2.02
 3 -8 -11 46.6 1.91
 -3 -8 11 44.47 1.97
 -3 8 -11 45.14 2.14
 3 -8 -11 44.69 1.77
 4 8 -11 1.78 0.6
 -4 -8 -11 1 0.31
 4 8 -11 1.65 0.45
 4 -8 11 1.68 0.49
 -4 8 -11 2.72 0.68
 4 -8 -11 2 0.5
 4 -8 -11 1.74 0.41
 -4 -8 11 2.71 0.56
 -4 8 -11 1.9 0.54
 -5 -8 -11 12.26 0.89
 5 8 -11 10.98 1.38
 5 -8 -11 14.6 1.17
 -5 8 -11 13.17 1.22
 -5 8 -11 12.28 1.11
 -5 -8 11 12.97 1.1
 -6 -8 -11 1.44 0.46
 6 8 -11 2.1 0.73
 -6 8 -11 0.42 0.43
 -6 8 -11 1.34 0.51
 -6 -8 11 1.46 0.53
 0 -9 -11 11.97 0.46
 0 9 -11 12.86 0.91
 0 9 -11 12.96 0.91
 0 -9 -11 11.59 0.45
 0 9 -11 11.12 0.96
 1 9 -11 57.63 2.21
 -1 9 11 56.61 1.66
 1 9 -11 55.2 2.35
 -1 -9 11 55.36 2.16
 -1 9 -11 61.55 2.25
 -1 9 -11 55.02 2.19
 1 -9 -11 53.6 1.71
 -1 9 -11 54.09 2.3
 1 -9 -11 54.82 1.76
 -2 9 11 5.05 0.41
 2 9 -11 5.55 0.74
 -2 -9 -11 6.09 0.36
 -2 -9 -11 4.99 0.34
 2 9 -11 4.24 0.71
 -2 -9 -11 6.03 0.39
 -2 9 11 4.99 0.43
 -2 9 -11 6.68 0.79
 -2 9 -11 5.93 0.72
 2 -9 -11 5.82 0.48
 -2 -9 11 5.25 0.68
 -2 9 -11 4.91 0.75
 2 -9 -11 6.03 0.53
 3 -9 11 17.11 1.14
 -3 9 11 17.92 0.92
 -3 -9 -11 17.7 0.83
 3 9 -11 20.81 1.24
 -3 -9 -11 19.42 0.93
 -3 9 11 19.35 1.05
 -3 -9 -11 19.4 0.88
 3 9 -11 18.34 1.32
 -3 -9 11 18.6 1.19
 3 -9 -11 19.78 1.09
 -3 9 -11 18.78 1.22
 3 -9 -11 19.81 1.02
 -3 9 -11 19.45 1.34
 4 -9 11 5.77 0.8
 4 9 -11 5.05 0.9
 -4 -9 -11 5.88 0.55
 -4 9 -11 6.02 0.82
 -4 -9 11 5.56 0.82
 -4 9 -11 5.82 0.94
 4 -9 -11 5.68 0.77
 5 9 -11 5.87 0.98
 -5 -9 -11 6.23 0.7
 -5 9 -11 7.29 0.97
 -5 -9 11 8.99 1.12
 -5 9 -11 7.53 1.08
 0 10 -11 1.07 0.39
 0 10 -11 1.5 0.48
 0 10 -11 1.52 0.4
 1 10 -11 4.57 0.68
 1 10 -11 4.46 0.74
 -1 10 11 3.92 0.26
 -1 10 -11 5.85 0.76
 -1 10 -11 4.17 0.69
 1 -10 -11 4.29 0.32
 1 -10 -11 3.85 0.31
 -1 -10 11 4.53 0.65
 -1 10 -11 4.81 0.68
 2 10 -11 14.04 1.02
 -2 -10 -11 13.66 0.51
 -2 -10 -11 12.83 0.52
 -2 -10 -11 13.45 0.48
 -2 10 11 14.32 0.65
 2 10 -11 11.63 1.07
 -2 10 -11 13.28 1.07
 2 -10 -11 15.06 0.78
 -2 10 -11 13.82 1.01
 -2 -10 11 11.56 0.93
 -2 10 -11 14.08 0.98
 2 -10 -11 12.95 0.7
 3 10 -11 5.63 0.88
 -3 10 11 5.83 0.51
 3 -10 11 6.07 0.79
 -3 -10 -11 5.24 0.42
 -3 -10 -11 5.98 0.48
 3 -10 -11 5.2 0.58
 3 -10 -11 5.36 0.62
 -3 -10 11 6.35 0.83
 -3 10 -11 6.05 0.91
 -3 10 -11 6.73 0.87
 -4 -10 -11 0.42 0.23
 4 10 -11 0.08 0.4
 -4 10 -11 0.44 0.36
 -4 10 -11 0.26 0.43
 -4 -10 11 0.64 0.39
 5 10 -11 6.25 1.08
 -5 -10 -11 5.96 0.69
 -5 10 -11 7.78 1.17
 -5 -10 11 6.26 0.93
 0 11 -11 11.84 0.92
 0 11 -11 14.55 1
 0 11 -11 12.03 1
 1 11 -11 2.03 0.54
 1 11 -11 2.36 0.55
 1 -11 -11 2.09 0.24
 -1 11 -11 1.97 0.52
 -1 11 -11 2.8 0.56
 -1 11 -11 2.7 0.53
 -2 11 11 3.69 0.32
 -2 11 11 2.82 0.37
 2 11 -11 3.74 0.68
 -2 11 -11 3.54 0.69
 2 -11 -11 4.61 0.42
 -2 11 -11 4.38 0.63
 2 -11 -11 3.92 0.42
 -2 11 -11 3.52 0.62
 -2 -11 11 1.85 0.44
 -3 11 11 1.51 0.28
 -3 -11 -11 1.53 0.26
 3 -11 11 0.99 0.41
 3 11 -11 1.18 0.49
 -3 -11 -11 1.25 0.26
 -3 11 -11 1.74 0.48
 -3 11 -11 1.66 0.57
 3 -11 -11 0.99 0.3
 -3 -11 11 1.18 0.44
 4 11 -11 5.8 1.03
 -4 -11 -11 6.6 0.54
 -4 11 -11 6.19 0.97
 -4 -11 11 6.83 0.94
 -4 11 -11 5.72 0.88
 5 11 -11 1.14 0.61
 -5 -11 -11 1.61 0.38
 -5 -11 11 0.84 0.43
 -5 11 -11 0.81 0.49
 0 12 -11 6.02 0.88
 0 12 -11 5.94 0.73
 1 12 -11 24.41 1.41
 1 12 -11 22.42 1.47
 1 -12 -11 22.7 0.8
 -1 12 -11 25.39 1.5
 -1 12 -11 24.38 1.37
 2 12 -11 5.11 0.83
 -2 12 -11 5.2 0.73
 -2 -12 11 8.01 0.93
 -2 12 -11 7.18 0.97
 2 -12 -11 6.52 0.48
 -3 -12 -11 1.86 0.26
 -3 12 11 1.8 0.36
 3 12 -11 1.22 0.56
 -3 12 -11 2.53 0.64
 -3 12 -11 3.04 0.64
 3 -12 -11 2.14 0.39
 -3 -12 11 1.48 0.45
 -4 -12 -11 5.63 0.5
 4 12 -11 5.18 0.95
 -4 -12 11 6.09 0.9
 -4 12 -11 6.14 0.97
 -5 -12 -11 11.91 0.84
 5 12 -11 13.19 1.6
 -5 -12 11 12.36 1.15
 -5 12 -11 11.73 1.45
 0 13 -11 19.03 1.21
 0 13 -11 18.91 1.31
 1 13 -11 1.61 0.49
 1 13 -11 2.27 0.63
 1 -13 -11 1.82 0.19
 -1 13 -11 1.47 0.54
 -1 13 -11 1.22 0.43
 2 13 -11 2.56 0.65
 -2 13 -11 3.85 0.67
 2 -13 -11 2.95 0.36
 -2 -13 11 2.39 0.55
 -2 13 -11 4.44 0.81
 3 13 -11 4.92 0.9
 -3 -13 -11 5.08 0.33
 3 -13 -11 5.18 0.56
 -3 13 -11 5.48 0.93
 -3 -13 11 5.39 0.78
 4 13 -11 7.43 1.18
 -4 -13 -11 7.45 0.55
 -4 -13 11 8.56 1.04
 -4 13 -11 8.01 1.15
 0 14 -11 4.19 0.8
 1 14 -11 -0.36 0.3
 -1 14 -11 -0.07 0.31
 2 14 -11 3.37 0.74
 -2 14 11 3.51 0.32
 -2 14 -11 3.86 0.78
 -2 -14 11 2.28 0.57
 2 -14 -11 4.15 0.38
 3 14 -11 1.84 0.66
 -3 -14 -11 1.11 0.16
 -3 -14 11 1.18 0.47
 -3 14 -11 1.63 0.56
 4 14 -11 0.88 0.54
 -4 -14 -11 0.48 0.21
 -4 14 -11 0.4 0.39
 -4 -14 11 0.82 0.44
 0 15 -11 1.6 0.5
 1 15 -11 1.79 0.57
 -1 15 -11 1.39 0.5
 -2 15 11 0.31 0.13
 2 15 -11 0.08 0.39
 -2 15 -11 0.44 0.39
 -2 -15 11 0.77 0.41
 2 -15 -11 0.33 0.18
 3 15 -11 0.02 0.37
 -3 15 11 0.42 0.25
 -3 -15 11 0.43 0.42
 -3 15 -11 0.53 0.44
 0 16 -11 -0.11 0.32
 1 16 -11 1.31 0.61
 -1 16 -11 1.28 0.57
 2 16 -11 5.13 0.98
 2 -16 -11 4.94 0.41
 -2 16 -11 5.98 0.98
 0 17 -11 0.39 0.43
 1 17 -11 1.17 0.55
 -1 17 -11 0.24 0.43
 0 0 -12 0.79 0.29
 0 0 -12 0.9 0.26
 0 0 12 0.66 0.26
 1 0 12 -0.05 0.19
 1 0 -12 -0.15 0.16
 -1 0 12 -0.03 0.21
 1 0 -12 0.15 0.24
 -1 0 12 0.28 0.18
 -1 0 -12 0.05 0.17
 -1 0 -12 0.01 0.16
 -1 0 -12 0.01 0.22
 2 0 -12 0.37 0.24
 -2 0 -12 0.88 0.29
 2 0 -12 1.22 0.41
 -2 0 -12 0.63 0.28
 -2 0 12 0.18 0.23
 -3 0 -12 0.5 0.27
 -3 0 12 -0.16 0.27
 -3 0 12 0.39 0.25
 3 0 -12 0.23 0.24
 -3 0 -12 0.22 0.26
 3 0 -12 0.31 0.34
 -4 0 -12 10.97 0.87
 -4 0 12 9.98 0.83
 4 0 -12 13.17 1.12
 -4 0 -12 9.39 0.88
 -4 0 12 11.92 1.02
 4 0 -12 9.68 0.86
 -5 0 -12 4.12 0.7
 5 0 -12 5.71 0.97
 -5 0 -12 5.08 0.79
 -6 0 -12 0.12 0.38
 -6 0 -12 0.22 0.38
 6 0 -12 0.13 0.49
 0 -1 -12 4.98 0.57
 0 1 -12 5.76 0.53
 0 -1 -12 5.51 0.49
 0 1 12 5.32 0.5
 0 -1 12 5.25 0.6
 0 1 -12 6.08 0.67
 1 1 -12 22.03 1.2
 -1 -1 -12 22.65 1.04
 1 -1 12 22.68 1.16
 -1 1 12 23.85 1.13
 -1 1 12 23.78 1.05
 1 1 -12 24.52 1.14
 -1 -1 -12 22.09 1.09
 -1 -1 -12 24.44 1.05
 -1 1 -12 22.28 1.16
 -1 1 -12 23.76 1.11
 1 -1 -12 25.1 1.21
 -1 1 -12 23.29 1.08
 1 -1 -12 22.63 1.07
 -1 -1 12 22.42 1.16
 1 1 12 22.98 1.11
 2 1 -12 5.63 0.63
 -2 -1 -12 7.68 0.6
 -2 1 12 7.5 0.66
 2 1 -12 5.87 0.74
 -2 -1 -12 6.99 0.61
 -2 1 12 7.53 0.6
 -2 -1 12 8.22 0.73
 2 -1 -12 7.1 0.81
 -2 1 -12 7.41 0.68
 -2 -1 12 6.53 0.59
 2 -1 -12 7.69 0.63
 -2 1 -12 7.75 0.65
 -3 1 12 4.61 0.6
 -3 1 12 6.12 0.76
 3 1 -12 4.13 0.69
 -3 -1 -12 4.53 0.58
 -3 -1 -12 6.25 0.75
 3 1 -12 5.8 0.71
 -3 -1 12 5.57 0.68
 3 -1 -12 5.38 0.64
 -3 -1 12 7.27 0.87
 -3 1 -12 5.01 0.68
 -3 1 -12 6.04 0.67
 3 -1 -12 5.85 0.79
 -4 1 12 9.55 0.81
 -4 1 12 11.08 1.15
 4 1 -12 9.93 0.89
 4 1 -12 9.03 1.08
 -4 -1 -12 9.42 0.81
 -4 -1 -12 10.77 0.91
 4 -1 -12 10.85 0.9
 4 -1 -12 12.99 1.12
 -4 1 -12 10.28 0.87
 -4 1 -12 11.83 0.99
 -4 -1 12 10.68 0.96
 -4 -1 12 10.41 0.85
 -5 -1 -12 9.15 0.87
 5 1 -12 8.48 1.17
 -5 -1 -12 10.3 0.95
 -5 1 -12 9.66 0.91
 5 -1 -12 8.72 1.12
 -5 -1 12 8.87 1
 -5 1 -12 8.51 1.04
 -6 -1 -12 2.82 0.66
 6 1 -12 4.3 0.97
 -6 1 -12 3.33 0.76
 -6 1 -12 4.12 0.77
 6 -1 -12 3.91 0.88
 0 2 -12 16.33 0.89
 0 2 -12 15.04 0.95
 0 -2 12 16.18 0.95
 0 2 12 14.82 0.81
 0 -2 -12 14.52 0.84
 0 -2 -12 15.11 0.79
 -1 -2 -12 10.77 0.66
 -1 2 12 12.09 0.74
 1 2 -12 11.24 0.77
 -1 2 12 10.59 0.64
 -1 -2 -12 9.91 0.62
 1 -2 12 10.17 0.78
 -1 -2 -12 10.85 0.71
 1 2 -12 11.13 0.85
 -1 2 -12 10.99 0.79
 1 -2 -12 10.07 0.67
 1 -2 -12 10.98 0.77
 -1 2 -12 9.95 0.72
 -1 2 -12 11.36 0.73
 -1 -2 12 10.98 0.72
 -1 -2 12 10.47 0.79
 1 2 12 11.25 0.71
 -2 2 12 0.6 0.31
 2 2 -12 0.62 0.37
 2 2 -12 0.98 0.33
 -2 -2 -12 0.74 0.25
 -2 2 12 0.97 0.27
 -2 -2 -12 1.52 0.35
 2 -2 -12 0.76 0.35
 2 -2 -12 0.72 0.28
 -2 -2 12 0.8 0.3
 -2 2 -12 0.97 0.34
 -2 -2 12 1.21 0.42
 -2 2 -12 0.68 0.33
 -3 2 12 0.93 0.35
 -3 -2 -12 0.12 0.25
 -3 2 12 0.56 0.25
 3 2 -12 1.06 0.39
 -3 -2 -12 0.55 0.29
 3 2 -12 1.04 0.45
 -3 2 -12 1.03 0.39
 -3 -2 12 0.78 0.32
 3 -2 -12 0.42 0.36
 -3 -2 12 0.27 0.3
 -3 2 -12 0.66 0.3
 3 -2 -12 0.93 0.33
 -4 2 12 1.82 0.49
 -4 -2 -12 2.15 0.44
 4 2 -12 2.12 0.58
 -4 2 12 1.97 0.45
 4 2 -12 2.44 0.54
 -4 -2 -12 2.01 0.48
 -4 -2 12 2.08 0.49
 -4 2 -12 1.65 0.44
 4 -2 -12 2.77 0.62
 -4 2 -12 2.07 0.53
 4 -2 -12 1.95 0.46
 -5 -2 -12 3.59 0.63
 5 2 -12 2.71 0.74
 -5 -2 -12 3.92 0.63
 -5 2 -12 4.25 0.78
 -5 2 -12 3.62 0.69
 5 -2 -12 3.09 0.7
 -5 -2 12 4.74 0.74
 -6 -2 -12 7.97 0.96
 6 2 -12 7.72 1.22
 -6 2 -12 9.3 1.1
 -6 2 -12 8.48 1.1
 6 -2 -12 7.03 1.12
 0 -3 12 2.12 0.42
 0 3 -12 2.27 0.46
 0 3 -12 2.21 0.46
 0 -3 -12 2.8 0.36
 0 3 -12 2.1 0.4
 0 -3 -12 2.49 0.4
 0 3 12 2.26 0.35
 -1 -3 -12 7.39 0.51
 1 3 -12 7.84 0.86
 -1 3 12 6.77 0.5
 -1 3 12 7.1 0.57
 1 -3 12 7.61 0.81
 -1 -3 -12 6.41 0.51
 -1 -3 -12 6.04 0.53
 1 3 -12 6.95 0.63
 -1 -3 12 7.6 0.7
 -1 3 -12 6.43 0.72
 -1 -3 12 7.2 0.61
 -1 3 -12 6.95 0.69
 1 -3 -12 6.73 0.68
 -1 3 -12 8.06 0.66
 1 3 12 7.17 0.55
 1 -3 -12 8.26 0.58
 -2 3 12 7.83 0.65
 2 3 -12 9.85 0.87
 -2 -3 -12 8.98 0.65
 2 3 -12 9.58 0.75
 -2 -3 -12 8.29 0.6
 -2 3 12 8.19 0.61
 2 -3 -12 8.63 0.75
 2 -3 -12 8.39 0.65
 -2 3 -12 9.31 0.77
 -2 -3 12 7.91 0.69
 -2 -3 12 9.7 0.82
 -2 3 -12 8.81 0.73
 3 3 -12 3.11 0.55
 -3 -3 -12 3.37 0.48
 -3 -3 -12 3.04 0.5
 -3 3 12 3.43 0.49
 -3 3 12 3.35 0.56
 3 3 -12 2.53 0.59
 3 -3 -12 3.16 0.57
 -3 -3 12 3.27 0.63
 -3 3 -12 1.82 0.49
 -3 -3 12 4.21 0.63
 3 -3 -12 2.89 0.47
 -3 3 -12 3.49 0.54
 -4 -3 -12 1.81 0.42
 4 3 -12 2.52 0.67
 -4 3 12 1.64 0.5
 4 3 -12 1.83 0.49
 -4 -3 -12 1.69 0.44
 -4 3 -12 1.45 0.42
 4 -3 -12 1.28 0.4
 4 -3 -12 1.97 0.54
 -4 3 -12 1.93 0.55
 -4 -3 12 1.85 0.46
 -5 3 12 1.46 0.53
 -5 -3 -12 1.8 0.47
 5 3 -12 1.11 0.57
 5 -3 -12 1.85 0.58
 -5 -3 12 1.6 0.44
 -5 3 -12 1.96 0.53
 -5 3 -12 1.32 0.52
 -6 -3 -12 4.73 0.77
 6 3 -12 2.57 0.76
 -6 3 -12 4.78 0.87
 6 -3 -12 3.57 0.85
 -6 3 -12 3.62 0.81
 0 4 12 100.25 2.96
 0 4 -12 102.05 3.2
 0 -4 -12 100.54 2.92
 0 -4 12 103.85 3.32
 0 4 -12 93.96 3.26
 0 -4 -12 98.17 3.01
 0 4 -12 95.61 3.28
 1 -4 12 6.51 0.75
 1 4 -12 7.11 0.74
 -1 -4 -12 6.84 0.48
 -1 4 12 6.65 0.53
 -1 -4 -12 7.24 0.54
 -1 4 12 6.38 0.47
 1 4 -12 7.14 0.84
 -1 -4 -12 6.22 0.47
 -1 -4 12 5.8 0.7
 1 -4 -12 7.61 0.61
 -1 -4 12 5.37 0.6
 -1 4 -12 7.3 0.66
 -1 4 -12 6.6 0.61
 -1 4 -12 6.48 0.76
 1 -4 -12 7.37 0.54
 -2 -4 -12 7.45 0.59
 2 -4 12 6.26 0.75
 2 4 -12 8 0.92
 -2 -4 -12 6.24 0.52
 -2 4 12 8.4 0.58
 -2 4 12 8.39 0.65
 2 4 -12 7.91 0.71
 -2 4 -12 8.56 0.91
 -2 -4 12 7.08 0.66
 2 -4 -12 5.98 0.68
 -2 4 -12 8 0.82
 -2 -4 12 8.2 0.91
 2 -4 -12 8.24 0.62
 -3 4 12 4.63 0.65
 3 4 -12 4.79 0.79
 -3 4 12 4.2 0.53
 3 4 -12 4.25 0.63
 -3 -4 -12 4.44 0.52
 -3 -4 -12 4.07 0.55
 -3 4 -12 4.92 0.66
 3 -4 -12 4.04 0.57
 -3 -4 12 3.95 0.6
 -3 4 -12 3.8 0.62
 3 -4 -12 4.43 0.68
 -3 -4 12 3.16 0.58
 4 4 -12 18.19 1.36
 -4 4 12 19.67 1.12
 4 4 -12 18.91 1.22
 -4 4 12 19.42 1.23
 -4 -4 -12 19.98 1.14
 -4 -4 -12 19.19 1.08
 -4 4 -12 16.64 1.23
 4 -4 -12 18.04 1.28
 4 -4 -12 18.23 1.14
 -4 4 -12 17.59 1.19
 -4 -4 12 17.82 1.16
 5 4 -12 2.95 0.75
 -5 -4 -12 1.35 0.41
 -5 4 12 2.7 0.63
 5 -4 -12 2.14 0.64
 -5 4 -12 1.94 0.55
 -5 4 -12 1.67 0.63
 -5 -4 12 2.24 0.53
 6 4 -12 0.44 0.47
 -6 -4 -12 0.77 0.41
 -6 4 -12 0.13 0.37
 6 -4 -12 0.65 0.5
 -6 4 -12 0.28 0.38
 0 5 -12 28.66 1.46
 0 -5 12 31.71 1.48
 0 5 -12 27.08 1.39
 0 -5 -12 28.42 1.1
 0 -5 -12 30.6 1.19
 0 5 -12 31.31 1.4
 0 5 12 30.15 1.13
 -1 -5 -12 71.05 2.17
 1 5 -12 72.61 2.71
 -1 -5 -12 72.4 2.24
 -1 5 12 74.01 2.19
 1 5 -12 73.1 2.55
 -1 -5 -12 69.77 2.17
 1 -5 12 73.13 2.66
 -1 5 12 71.78 2.28
 -1 5 -12 69.75 2.49
 -1 5 -12 68.36 2.5
 -1 5 -12 70.4 2.63
 1 -5 -12 71.32 2.26
 -1 -5 12 74.29 2.65
 -1 -5 12 70.07 2.48
 1 -5 -12 72.41 2.39
 -2 -5 -12 1.01 0.27
 -2 -5 -12 1.27 0.27
 2 5 -12 1.11 0.38
 2 -5 12 1.02 0.4
 2 5 -12 0.88 0.38
 -2 5 12 1.11 0.27
 -2 5 12 0.64 0.29
 2 -5 -12 1.23 0.36
 -2 -5 12 0.74 0.34
 -2 5 -12 0.74 0.38
 -2 -5 12 1.06 0.35
 -2 5 -12 1.17 0.36
 2 -5 -12 1.08 0.29
 3 5 -12 1.55 0.45
 -3 5 12 1.5 0.35
 -3 5 12 1.44 0.32
 3 5 -12 1.43 0.47
 -3 -5 -12 0.98 0.28
 -3 -5 -12 1.11 0.32
 3 -5 -12 0.7 0.38
 -3 5 -12 0.8 0.35
 -3 5 -12 0.67 0.41
 3 -5 -12 1.31 0.36
 -3 -5 12 1.69 0.41
 -4 -5 -12 25.51 1.29
 4 5 -12 25.71 1.46
 -4 5 12 21.3 1.33
 -4 -5 -12 25.7 1.25
 -4 5 12 26.26 1.3
 4 5 -12 25.36 1.63
 -4 5 -12 22.51 1.48
 4 -5 -12 22.97 1.3
 4 -5 -12 25.93 1.53
 -4 -5 12 23.78 1.39
 -4 5 -12 25.2 1.45
 -5 -5 -12 0.66 0.36
 5 5 -12 0.24 0.52
 5 -5 -12 0.88 0.5
 -5 -5 12 0.71 0.44
 -5 5 -12 0.44 0.4
 -5 5 -12 0.65 0.41
 -6 -5 -12 0.02 0.32
 6 5 -12 -0.16 0.46
 -6 5 -12 0.09 0.22
 -6 5 -12 -0.15 0.4
 6 -5 -12 -0.35 0.34
 0 -6 12 0.48 0.29
 0 6 -12 0.36 0.29
 0 6 -12 0.36 0.29
 0 -6 -12 0.72 0.24
 0 6 12 0.54 0.17
 0 6 -12 0.71 0.3
 0 -6 -12 0.67 0.2
 1 6 -12 74.4 2.85
 -1 -6 -12 74.06 2.26
 -1 6 12 77.84 2.38
 -1 -6 -12 74.76 2.27
 -1 6 12 78.88 2.29
 1 -6 12 79.03 2.84
 1 6 -12 80.61 2.74
 -1 -6 -12 77.11 2.33
 1 -6 -12 76.63 2.37
 -1 -6 12 80.96 2.85
 1 -6 -12 73.88 2.47
 -1 6 -12 74.07 2.8
 -1 6 -12 82.97 2.73
 -1 -6 12 73.39 2.64
 -1 6 -12 78.03 2.71
 -2 -6 -12 11.56 0.66
 2 6 -12 12.82 0.92
 2 6 -12 12.38 1
 2 -6 12 13.46 0.99
 -2 6 12 11.87 0.75
 -2 -6 -12 11.81 0.64
 -2 6 12 12.75 0.69
 -2 6 -12 11.32 0.88
 2 -6 -12 11.07 0.71
 -2 -6 12 11.19 0.85
 2 -6 -12 11.9 0.83
 -2 6 -12 10.67 0.91
 -3 -6 -12 47.91 1.77
 3 -6 12 44.19 1.93
 3 6 -12 45.14 2.01
 3 6 -12 46.85 2.24
 -3 -6 -12 44.63 1.69
 -3 6 12 50.32 1.81
 -3 6 12 49.21 1.94
 3 -6 -12 49.34 1.88
 -3 -6 12 51.18 2.06
 -3 6 -12 47.8 2.04
 -3 6 -12 47.41 2.14
 3 -6 -12 46.56 2.01
 -4 -6 -12 8.95 0.73
 4 6 -12 8.78 1.1
 -4 6 12 10.08 0.87
 -4 -6 -12 9.05 0.75
 4 6 -12 10.13 0.93
 -4 -6 12 7.95 0.91
 4 -6 -12 9.31 1.05
 -4 6 -12 9.03 1.08
 -4 6 -12 7.89 0.92
 4 -6 -12 10.22 0.82
 5 6 -12 18.29 1.52
 -5 -6 -12 20.75 1.22
 -5 6 -12 21.74 1.54
 5 -6 -12 22.61 1.52
 -5 6 -12 21.52 1.44
 -5 -6 12 23.61 1.44
 6 6 -12 0.97 0.56
 -6 -6 -12 1.23 0.45
 -6 6 -12 0.28 0.41
 6 -6 -12 1.66 0.65
 -6 6 -12 0.91 0.55
 0 -7 -12 26.97 1.03
 0 7 12 25.1 0.94
 0 -7 12 27.39 1.44
 0 7 -12 26.28 1.33
 0 7 -12 26.04 1.34
 0 7 -12 27.64 1.46
 0 -7 -12 27.08 0.97
 -1 -7 -12 44.55 1.46
 1 7 -12 47.08 1.92
 1 7 -12 43.52 2.02
 1 -7 12 44.49 1.98
 -1 -7 -12 45.79 1.43
 -1 7 12 48.6 1.46
 -1 -7 -12 43.96 1.43
 1 -7 -12 44.26 1.63
 -1 -7 12 43.25 1.84
 -1 7 -12 46.9 1.89
 -1 7 -12 45.99 1.91
 -1 7 -12 44.87 1.99
 1 -7 -12 47.53 1.56
 -2 7 12 14.49 0.81
 2 7 -12 12.73 1.07
 -2 -7 -12 14 0.68
 -2 -7 -12 13.27 0.66
 -2 7 12 13.69 0.71
 2 7 -12 13.63 0.98
 -2 -7 -12 14.52 0.7
 2 -7 -12 13.48 0.87
 -2 -7 12 13.72 0.95
 -2 7 -12 13.09 0.95
 2 -7 -12 13.59 0.78
 -2 7 -12 14.14 1.05
 3 7 -12 55.13 2.3
 -3 7 12 56.77 2.16
 3 -7 12 56.3 2.27
 3 7 -12 55.91 2.52
 -3 -7 -12 57.3 1.94
 -3 -7 -12 55.03 1.96
 -3 7 12 57.42 2.02
 -3 7 -12 56.84 2.46
 3 -7 -12 57.91 2.28
 -3 -7 12 55.17 2.28
 3 -7 -12 59.59 2.12
 -3 7 -12 60.2 2.36
 4 7 -12 6.13 1
 -4 -7 -12 5.49 0.61
 4 7 -12 3.05 0.61
 -4 7 -12 4.51 0.71
 4 -7 -12 5.37 0.79
 -4 7 -12 3.69 0.71
 -4 -7 12 4.23 0.71
 -5 -7 -12 0.83 0.34
 5 7 -12 0.18 0.53
 5 -7 -12 0.57 0.4
 -5 7 -12 1.14 0.5
 -5 -7 12 0.6 0.37
 -5 7 -12 0.9 0.43
 6 7 -12 0.4 0.46
 -6 -7 -12 0.16 0.33
 -6 7 -12 0.26 0.46
 -6 7 -12 0.5 0.43
 0 8 -12 11.19 0.94
 0 -8 -12 12.44 0.59
 0 -8 -12 13.3 0.57
 0 8 -12 13.23 0.92
 0 -8 -12 12.19 0.55
 0 8 -12 13.04 0.93
 -1 -8 -12 16.3 0.64
 -1 -8 -12 17.01 0.65
 -1 -8 -12 16.3 0.66
 1 8 -12 15.77 1.04
 -1 8 12 16.79 0.73
 -1 8 12 16.55 0.65
 1 8 -12 16.37 1.15
 -1 8 -12 16.07 1.05
 -1 8 -12 14.63 1.11
 -1 8 -12 17.86 1.09
 1 -8 -12 15.74 0.8
 1 -8 -12 16.49 0.75
 -1 -8 12 18.43 1.07
 -2 8 12 8.36 0.52
 -2 8 12 8.27 0.6
 2 8 -12 8.86 0.81
 -2 -8 -12 6.95 0.46
 -2 -8 -12 7.19 0.48
 2 8 -12 7.38 0.93
 -2 -8 -12 7.13 0.45
 -2 8 -12 7.37 0.82
 -2 8 -12 7.14 0.9
 2 -8 -12 7.36 0.63
 -2 -8 12 8.17 0.76
 2 -8 -12 7.17 0.56
 -2 8 -12 9.14 0.95
 -3 -8 -12 3.56 0.42
 -3 8 12 5.25 0.56
 3 8 -12 4.81 0.73
 -3 8 12 3.08 0.51
 3 8 -12 2.61 0.64
 -3 -8 -12 3.73 0.44
 3 -8 12 4.91 0.7
 -3 -8 12 4.13 0.64
 3 -8 -12 4.1 0.62
 -3 8 -12 4.02 0.7
 -3 8 -12 4.14 0.67
 3 -8 -12 4.98 0.57
 4 8 -12 2.12 0.59
 4 8 -12 0.8 0.39
 -4 -8 -12 0.91 0.3
 -4 -8 12 0.7 0.35
 -4 8 -12 0.92 0.4
 4 -8 -12 1.29 0.41
 -4 8 -12 0.75 0.42
 -5 -8 -12 5.49 0.69
 5 8 -12 4.83 0.93
 -5 -8 12 6.23 0.87
 -5 8 -12 5.59 0.94
 -5 8 -12 5.49 0.86
 0 9 -12 2.66 0.62
 0 -9 -12 3.2 0.25
 0 -9 -12 2.95 0.24
 0 9 -12 2.63 0.51
 0 9 -12 2.72 0.5
 0 -9 -12 2.74 0.23
 1 9 -12 26.32 1.39
 -1 9 12 24.85 0.92
 -1 -9 -12 25.53 0.82
 1 9 -12 26.09 1.5
 -1 -9 -12 25.54 0.82
 1 -9 -12 27.22 1.05
 -1 9 -12 27.78 1.42
 1 -9 -12 26.39 0.98
 -1 -9 12 25.06 1.33
 -1 9 -12 25.81 1.39
 -1 9 -12 25.64 1.47
 2 9 -12 31.93 1.79
 -2 -9 -12 35.28 1.13
 -2 -9 -12 36.1 1.18
 -2 9 12 34.88 1.23
 -2 -9 -12 32.24 1.12
 2 9 -12 36.44 1.71
 2 -9 -12 33.62 1.41
 -2 9 -12 31.81 1.62
 2 -9 -12 32.83 1.31
 -2 -9 12 34.32 1.65
 -2 9 -12 33.94 1.64
 -2 9 -12 33.77 1.78
 3 9 -12 20.07 1.24
 3 9 -12 19.46 1.4
 -3 9 12 17.86 0.92
 3 -9 12 18.41 1.21
 -3 -9 -12 16.46 0.82
 3 -9 -12 18.72 1.01
 -3 9 -12 18.53 1.32
 -3 9 -12 18.05 1.22
 3 -9 -12 19.22 1.12
 -3 -9 12 18.73 1.21
 4 9 -12 3.22 0.81
 -4 -9 -12 4.44 0.53
 -4 9 -12 4.1 0.73
 -4 9 -12 4.92 0.87
 -4 -9 12 4.91 0.79
 5 9 -12 -0.55 0.3
 -5 -9 -12 0.43 0.3
 -5 9 -12 0.3 0.39
 -5 9 -12 0.11 0.34
 -5 -9 12 0.14 0.34
 0 10 -12 23.42 1.31
 0 10 -12 22.69 1.29
 0 10 -12 22.08 1.39
 1 10 -12 10.98 0.9
 -1 10 12 10.59 0.46
 1 10 -12 11.36 1.02
 1 -10 -12 10.11 0.52
 -1 10 -12 12.12 0.93
 -1 10 -12 11.29 0.91
 -1 10 -12 10.83 0.99
 1 -10 -12 10.5 0.55
 -2 -10 -12 1.72 0.18
 2 10 -12 2.05 0.54
 -2 -10 -12 1.66 0.19
 -2 -10 -12 1.81 0.21
 2 10 -12 0.87 0.36
 -2 -10 -12 1.93 0.21
 -2 10 12 2.35 0.3
 -2 10 12 2.14 0.33
 -2 -10 12 1.29 0.44
 2 -10 -12 1.32 0.3
 -2 10 -12 1.64 0.46
 2 -10 -12 1.79 0.34
 -2 10 -12 2.1 0.57
 -2 10 -12 2.18 0.5
 3 -10 12 7.2 0.89
 -3 10 12 6.41 0.54
 3 10 -12 8.2 1.1
 -3 -10 -12 7.26 0.5
 -3 -10 -12 7.67 0.54
 3 -10 -12 5.84 0.63
 -3 10 -12 8.43 0.99
 -3 10 -12 8.76 1.11
 -3 -10 12 6.32 0.81
 -4 -10 -12 0.57 0.27
 4 10 -12 0.81 0.48
 -4 -10 12 0.98 0.44
 -4 10 -12 0.14 0.32
 -4 10 -12 0.38 0.38
 5 10 -12 3 0.83
 -5 -10 -12 3.85 0.55
 -5 10 -12 2.8 0.7
 -5 -10 12 2.84 0.64
 0 11 -12 1.9 0.48
 0 11 -12 2.57 0.64
 0 11 -12 2.13 0.46
 1 11 -12 0.98 0.45
 1 11 -12 0.66 0.35
 -1 11 -12 0.53 0.31
 -1 11 -12 0.76 0.36
 1 -11 -12 0.64 0.16
 -1 11 -12 1.57 0.51
 2 11 -12 4.31 0.78
 2 -11 -12 3.89 0.43
 -2 11 -12 2.91 0.63
 -2 -11 12 3.75 0.66
 -2 11 -12 3.6 0.64
 -2 11 -12 4.01 0.65
 -3 -11 -12 17.15 0.76
 -3 -11 -12 20.6 0.83
 3 11 -12 16.77 1.35
 -3 -11 12 17.74 1.23
 -3 11 -12 17.62 1.23
 3 -11 -12 17.5 0.97
 -3 11 -12 16.88 1.31
 4 11 -12 2.62 0.72
 -4 -11 -12 3.44 0.44
 -4 11 -12 6.89 0.98
 -4 -11 12 3.51 0.68
 -4 11 -12 4.9 0.87
 5 11 -12 3.89 0.9
 -5 -11 -12 2.34 0.46
 -5 -11 12 2.8 0.64
 -5 11 -12 2.9 0.73
 0 12 -12 0.69 0.39
 0 12 -12 0.52 0.32
 1 12 -12 1.25 0.41
 1 12 -12 1.93 0.57
 1 -12 -12 2.27 0.23
 -1 12 -12 1.59 0.45
 -1 12 -12 2.55 0.64
 2 12 -12 7.7 1.04
 2 -12 -12 7.03 0.51
 -2 12 -12 8.89 1.12
 -2 12 -12 7.79 0.95
 -2 -12 12 7.03 0.9
 -3 -12 -12 0.38 0.15
 3 12 -12 1.28 0.55
 3 -12 -12 0.15 0.2
 -3 12 -12 0 0.32
 -3 12 -12 0.4 0.41
 -3 -12 12 -0.09 0.28
 4 12 -12 0.14 0.44
 -4 -12 -12 0.38 0.22
 -4 -12 12 0.39 0.39
 -4 12 -12 0.48 0.41
 0 13 -12 5.78 0.89
 0 13 -12 4.42 0.69
 1 13 -12 0.3 0.33
 1 13 -12 -0.22 0.29
 -1 13 -12 0.62 0.34
 -1 13 -12 0.72 0.47
 1 -13 -12 0.34 0.12
 2 13 -12 17.94 1.38
 -2 -13 12 17.19 1.21
 2 -13 -12 17.73 0.81
 -2 13 -12 19.56 1.39
 3 13 -12 6.42 1.05
 -3 -13 -12 5.24 0.31
 -3 -13 12 3.95 0.76
 -3 13 -12 4.61 0.84
 -4 -13 -12 3.02 0.39
 4 13 -12 3 0.78
 -4 13 -12 2.53 0.69
 -4 -13 12 3.74 0.74
 0 14 -12 0.07 0.33
 1 14 -12 0.5 0.48
 -1 14 -12 0.05 0.38
 -2 14 12 2.18 0.25
 2 14 -12 2.13 0.64
 -2 -14 12 1.19 0.46
 2 -14 -12 2.05 0.3
 -2 14 -12 2.4 0.65
 3 14 -12 5.91 1.03
 -3 14 -12 5.19 0.91
 -3 -14 12 5.09 0.79
 0 15 -12 3 0.7
 1 15 -12 0.41 0.48
 -1 15 -12 1.67 0.59
 2 15 -12 0.42 0.45
 2 -15 -12 0.8 0.21
 -2 15 -12 1.58 0.56
 -2 -15 12 -0.14 0.3
 3 15 -12 7.96 1.16
 -3 15 -12 7.47 1.1
 -3 -15 12 9.05 1.11
 0 16 -12 4.69 0.89
 1 16 -12 0.85 0.46
 -1 16 -12 -0.3 0.34
 2 16 -12 0.51 0.46
 2 -16 -12 -0.01 0.13
 -2 16 -12 0.44 0.43
 0 17 -12 -0.19 0.37
 0 0 -13 1 0.31
 0 0 -13 1.11 0.29
 1 0 13 8.57 0.7
 -1 0 13 8.24 0.7
 1 0 -13 9.1 0.68
 -1 0 -13 9.6 0.73
 -1 0 13 8.75 0.64
 -1 0 -13 8.66 0.64
 1 0 -13 8.75 0.76
 -1 0 -13 8.35 0.66
 -2 0 13 8.35 0.75
 2 0 -13 8.03 0.9
 -2 0 -13 8.47 0.69
 2 0 -13 7.57 0.68
 -2 0 -13 9.46 0.76
 -3 0 13 1.75 0.46
 3 0 -13 1 0.44
 3 0 -13 1.85 0.44
 -3 0 13 1.28 0.34
 -3 0 -13 0.79 0.35
 -3 0 -13 0.86 0.32
 -4 0 -13 9.54 1.02
 4 0 -13 8.52 1.08
 -4 0 -13 9.78 0.84
 -4 0 13 9.17 0.82
 4 0 -13 8.68 0.93
 -4 0 13 10.41 0.94
 -5 0 -13 11.45 1.02
 -5 0 -13 12.34 1.03
 5 0 -13 12.15 1.35
 6 0 -13 6.64 1.09
 -6 0 -13 4.44 0.75
 -6 0 -13 4.59 0.85
 0 1 -13 19.31 1.02
 0 -1 -13 21.67 1.09
 0 1 -13 21.94 1.15
 0 -1 -13 21.04 1.01
 0 -1 13 20.84 1.11
 0 1 13 20.67 1.05
 1 1 -13 23.51 1.17
 -1 1 13 24.18 1.18
 -1 -1 -13 25.17 1.2
 1 -1 13 22.75 1.21
 -1 1 13 24.54 1.09
 -1 -1 -13 23.96 1.12
 -1 -1 -13 24.78 1.11
 1 1 -13 22.64 1.26
 1 1 13 24.61 1.18
 -1 1 -13 23.59 1.13
 -1 -1 13 23.21 1.23
 -1 1 -13 25.38 1.19
 1 -1 -13 24.63 1.25
 1 -1 -13 25.06 1.15
 -1 1 -13 23.94 1.22
 -2 1 13 12.75 0.82
 -2 1 13 13.36 0.91
 2 1 -13 14.25 0.91
 2 1 -13 11.65 0.94
 -2 -1 -13 14.42 0.9
 -2 -1 -13 13.57 0.84
 -2 -1 13 13.58 0.86
 2 -1 -13 12.86 0.85
 -2 1 -13 13.83 0.94
 -2 1 -13 13.96 0.88
 -2 -1 13 15.36 1
 2 -1 -13 14.98 1.02
 -3 1 13 7.06 0.83
 -3 -1 -13 8.18 0.7
 3 1 -13 7.66 0.93
 -3 -1 -13 6.75 0.76
 3 1 -13 8.86 0.77
 -3 -1 13 8.25 0.72
 -3 -1 13 8.38 0.95
 3 -1 -13 8.05 0.72
 -3 1 -13 9.21 0.97
 -3 1 -13 8.14 0.73
 3 -1 -13 6.64 0.87
 -4 1 13 0.91 0.31
 4 1 -13 1.19 0.48
 -4 1 13 1.34 0.45
 -4 -1 -13 0.91 0.43
 4 1 -13 1.49 0.46
 -4 -1 -13 1 0.38
 4 -1 -13 1.21 0.4
 4 -1 -13 1.31 0.51
 -4 1 -13 1.24 0.39
 -4 1 -13 1.2 0.43
 -4 -1 13 0.85 0.38
 -5 -1 -13 3.02 0.57
 -5 -1 -13 3.29 0.65
 5 1 -13 4.14 0.82
 -5 1 -13 3.64 0.69
 5 -1 -13 3.94 0.84
 -5 1 -13 3.33 0.65
 -6 -1 -13 10.98 1.26
 6 1 -13 15.02 1.71
 -6 -1 -13 14.13 1.19
 6 -1 -13 10.65 1.36
 -6 1 -13 14.82 1.21
 -6 1 -13 13.13 1.22
 0 2 -13 11.55 0.8
 0 -2 13 13.24 0.88
 0 2 13 12.91 0.78
 0 2 -13 13.08 0.9
 0 -2 -13 14.36 0.85
 0 2 -13 11.74 0.88
 0 -2 -13 14.25 0.78
 -1 2 13 5.12 0.47
 1 2 -13 4.34 0.63
 -1 2 13 5.51 0.6
 1 2 -13 4.91 0.58
 1 -2 13 3.67 0.57
 -1 -2 -13 5.52 0.6
 -1 -2 -13 4.58 0.5
 -1 -2 -13 4.33 0.49
 1 -2 -13 5.31 0.64
 -1 -2 13 5.02 0.68
 -1 2 -13 4.94 0.59
 1 -2 -13 3.76 0.48
 -1 2 -13 4.92 0.67
 -1 -2 13 5.62 0.62
 -1 2 -13 6.13 0.57
 1 2 13 4.62 0.55
 -2 2 13 44.23 1.82
 -2 -2 -13 46.08 1.72
 2 2 -13 43.73 1.99
 -2 -2 -13 44.03 1.77
 -2 2 13 46.58 1.74
 2 2 -13 47.13 1.89
 -2 2 -13 47.61 1.86
 2 -2 -13 43.06 1.76
 -2 2 -13 45.81 1.93
 -2 -2 13 45.98 1.83
 2 -2 -13 47.87 1.97
 -2 -2 13 46.37 1.96
 -3 2 13 3.01 0.56
 3 2 -13 4.02 0.62
 -3 -2 -13 3.65 0.54
 -3 -2 -13 4.67 0.58
 3 2 -13 3.35 0.65
 -3 2 13 2.71 0.45
 -3 2 -13 3.7 0.59
 -3 -2 13 2.48 0.46
 3 -2 -13 4.08 0.71
 3 -2 -13 2.7 0.49
 -3 -2 13 4.29 0.69
 -3 2 -13 3.27 0.58
 -4 -2 -13 12.2 0.92
 4 2 -13 12.45 1.15
 4 2 -13 15.19 1.08
 -4 2 13 14.16 1.09
 -4 2 13 10.82 0.85
 -4 -2 -13 13.45 1.02
 4 -2 -13 13.83 1.16
 -4 2 -13 15.25 1.14
 -4 2 -13 13.07 1.01
 4 -2 -13 15.4 1.05
 -4 -2 13 14.13 1.02
 5 2 -13 0.28 0.48
 -5 -2 -13 0.67 0.38
 -5 -2 -13 0.3 0.35
 -5 2 -13 1.33 0.5
 5 -2 -13 1.01 0.53
 -5 2 -13 0.19 0.38
 -6 -2 -13 0.47 0.41
 6 2 -13 0.48 0.5
 -6 2 -13 0.55 0.44
 -6 2 -13 0.54 0.48
 6 -2 -13 1.15 0.5
 0 -3 -13 6.89 0.6
 0 3 -13 6.65 0.63
 0 3 13 6.57 0.55
 0 -3 -13 6.8 0.54
 0 3 -13 8.5 0.87
 0 -3 13 7.16 0.66
 0 3 -13 5.87 0.69
 -1 3 13 20.23 1.01
 -1 -3 -13 20.76 1.01
 -1 -3 -13 20.14 0.95
 1 -3 13 20.84 1.18
 -1 -3 -13 19.75 0.92
 1 3 -13 17.67 1.05
 1 3 -13 19.47 1.2
 -1 3 13 20.89 0.94
 -1 -3 13 19.28 1.05
 -1 3 -13 19.73 1.09
 1 -3 -13 20.1 0.99
 -1 3 -13 21.02 1.17
 1 3 13 18.77 0.96
 1 -3 -13 20.78 1.1
 -1 3 -13 19.8 1.06
 -1 -3 13 19.51 1.15
 2 3 -13 4.45 0.64
 -2 3 13 3.73 0.48
 -2 3 13 4.74 0.61
 2 -3 13 4.7 0.67
 -2 -3 -13 3.72 0.51
 -2 -3 -13 4.93 0.53
 2 3 -13 4.99 0.76
 -2 -3 13 3.7 0.62
 2 -3 -13 3.59 0.59
 -2 -3 13 4.29 0.59
 -2 3 -13 4.18 0.66
 2 -3 -13 3.36 0.48
 -2 3 -13 3.62 0.54
 -3 3 13 0.27 0.2
 3 3 -13 -0.36 0.21
 -3 -3 -13 -0.1 0.2
 -3 3 13 0.38 0.3
 -3 -3 -13 0.31 0.24
 3 3 -13 0.18 0.35
 3 -3 -13 0.14 0.24
 -3 3 -13 0.36 0.33
 -3 -3 13 0.2 0.29
 -3 -3 13 0.07 0.21
 -3 3 -13 0.23 0.28
 3 -3 -13 0.12 0.28
 -4 -3 -13 0.16 0.24
 -4 3 13 0.86 0.39
 -4 3 13 0.5 0.28
 4 3 -13 0.38 0.31
 -4 -3 -13 0 0.26
 4 3 -13 0.63 0.45
 -4 3 -13 0.22 0.34
 4 -3 -13 0.12 0.3
 4 -3 -13 0.36 0.4
 -4 3 -13 0.37 0.33
 -4 -3 13 0.25 0.27
 -5 -3 -13 2.58 0.59
 -5 -3 -13 1.76 0.47
 -5 3 13 2.04 0.6
 5 3 -13 2.02 0.63
 -5 3 -13 2.57 0.56
 -5 3 -13 1.81 0.61
 5 -3 -13 2.31 0.65
 6 3 -13 0.44 0.52
 -6 -3 -13 0.72 0.41
 6 -3 -13 0.54 0.51
 -6 3 -13 0.15 0.36
 -6 3 -13 0.88 0.49
 0 -4 -13 82.1 2.5
 0 -4 13 80.27 2.85
 0 4 -13 77.53 2.81
 0 -4 -13 81.19 2.6
 0 4 13 79.35 2.53
 0 4 -13 81.75 2.89
 0 4 -13 80.19 2.74
 -1 -4 -13 11.74 0.73
 -1 4 13 12.76 0.68
 1 4 -13 12.68 0.87
 -1 4 13 11.95 0.73
 1 4 -13 12.02 0.94
 -1 -4 -13 11.59 0.67
 1 -4 13 11.95 0.9
 -1 -4 -13 11.44 0.66
 1 4 13 11.75 0.7
 1 -4 -13 12.17 0.82
 -1 4 -13 12.41 0.88
 -1 4 -13 11.66 0.82
 1 -4 -13 11.08 0.71
 -1 -4 13 12.11 0.83
 -1 4 -13 13.1 0.96
 -1 -4 13 11.58 0.91
 -2 -4 -13 78.68 2.64
 2 4 -13 81.85 2.9
 -2 4 13 84.7 2.64
 2 -4 13 83.55 2.99
 -2 4 13 82.18 2.75
 2 4 -13 75.05 3.01
 -2 -4 -13 83.23 2.61
 2 -4 -13 77.98 2.85
 -2 4 -13 82.05 2.87
 -2 -4 13 87.1 3.04
 -2 -4 13 84.58 2.87
 2 -4 -13 85.44 2.73
 -2 4 -13 85.58 3.03
 -3 4 13 0.4 0.29
 3 4 -13 0.7 0.33
 -3 -4 -13 0.71 0.28
 3 4 -13 0.22 0.4
 -3 4 13 0.53 0.27
 -3 -4 -13 0.98 0.33
 -3 -4 13 0.69 0.34
 3 -4 -13 1.02 0.35
 -3 4 -13 0.82 0.41
 -3 4 -13 0.83 0.37
 3 -4 -13 0.55 0.36
 -4 -4 -13 2.16 0.49
 4 4 -13 2.36 0.68
 -4 -4 -13 1.78 0.42
 4 4 -13 1.73 0.48
 -4 4 13 2.49 0.54
 -4 4 -13 2.27 0.57
 -4 4 -13 2.11 0.6
 4 -4 -13 2.6 0.6
 -4 -4 13 1.57 0.44
 -5 -4 -13 1.35 0.46
 5 4 -13 2.34 0.69
 -5 4 -13 2.08 0.62
 5 -4 -13 1.73 0.56
 -5 4 -13 2.41 0.61
 6 4 -13 0 0.44
 -6 -4 -13 0.77 0.41
 -6 4 -13 0.29 0.42
 -6 4 -13 0.65 0.51
 6 -4 -13 1.6 0.65
 0 5 -13 52.5 2.16
 0 5 -13 54.28 2.06
 0 -5 13 52.15 2.15
 0 -5 -13 53.63 1.76
 0 5 13 53.58 1.79
 0 -5 -13 53.86 1.86
 0 5 -13 49.56 2.07
 1 -5 13 93.19 3.27
 -1 5 13 91.98 2.88
 1 5 -13 90.64 3.14
 -1 5 13 98.82 2.8
 -1 -5 -13 91.85 2.78
 1 5 -13 94.16 3.35
 -1 -5 -13 94.33 2.86
 -1 -5 -13 95.87 2.8
 -1 5 -13 90.42 3.25
 -1 -5 13 96.68 3.3
 -1 -5 13 91.66 3.1
 1 -5 -13 93.74 3.01
 -1 5 -13 93.3 3.15
 1 -5 -13 93.88 2.87
 -1 5 -13 98.39 3.16
 2 -5 13 6.38 0.83
 2 5 -13 6.29 0.87
 -2 5 13 7.59 0.62
 -2 -5 -13 7.06 0.57
 2 5 -13 4.97 0.66
 -2 5 13 6.33 0.52
 -2 -5 -13 6.45 0.52
 -2 5 -13 7.77 0.83
 -2 5 -13 5.93 0.77
 2 -5 -13 6.01 0.71
 2 -5 -13 6.52 0.59
 -2 -5 13 6.45 0.81
 -2 -5 13 7.46 0.81
 -3 -5 -13 13.97 0.87
 -3 5 13 15.02 0.97
 3 5 -13 13.88 1.19
 -3 -5 -13 14.47 0.84
 -3 5 13 14.05 0.87
 3 5 -13 15.51 1.07
 -3 5 -13 15.14 1.15
 -3 -5 13 14.95 1.02
 3 -5 -13 15.4 1.1
 3 -5 -13 14.38 0.94
 -3 5 -13 15.07 1.07
 4 5 -13 10.84 1.14
 -4 -5 -13 9.63 0.78
 -4 5 13 11.04 0.93
 4 5 -13 9.83 1.22
 -4 -5 -13 10.24 0.83
 -4 5 -13 10.12 0.96
 4 -5 -13 10.32 1.13
 -4 -5 13 11.53 0.96
 -4 5 -13 9.17 1.09
 -5 -5 -13 0.59 0.36
 5 5 -13 0.11 0.43
 -5 5 -13 1.74 0.57
 -5 5 -13 0.56 0.5
 5 -5 -13 1.83 0.58
 -6 -5 -13 2.57 0.6
 6 5 -13 2.55 0.82
 -6 5 -13 1.76 0.61
 -6 5 -13 2.29 0.69
 6 -5 -13 1.9 0.67
 0 -6 13 2.05 0.5
 0 -6 -13 1.96 0.34
 0 6 -13 1.65 0.41
 0 6 -13 1.42 0.42
 0 6 -13 2.1 0.53
 0 -6 -13 1.84 0.29
 -1 6 13 10.65 0.65
 -1 6 13 10.99 0.59
 -1 -6 -13 12.06 0.66
 1 -6 13 10.76 0.9
 1 6 -13 9.72 0.93
 -1 -6 -13 10.94 0.6
 -1 -6 -13 11.87 0.62
 1 6 -13 11.58 0.86
 -1 6 -13 10.55 0.92
 1 -6 -13 11.75 0.76
 1 -6 -13 11.38 0.67
 -1 6 -13 11.64 0.88
 -1 -6 13 12.15 0.85
 -1 6 -13 11.68 0.87
 -1 -6 13 10.23 0.91
 2 6 -13 21.57 1.37
 2 6 -13 22.74 1.28
 -2 6 13 20.96 1.06
 -2 -6 -13 21.86 0.99
 -2 -6 -13 20.48 0.94
 -2 6 13 22.2 0.99
 -2 -6 13 21.22 1.21
 -2 6 -13 20.6 1.23
 -2 6 -13 24.33 1.28
 2 -6 -13 23.4 1.09
 2 -6 -13 23.55 1.21
 -2 6 -13 21.94 1.35
 -3 6 13 39.49 1.7
 3 6 -13 37.99 1.82
 3 6 -13 38.08 2.01
 -3 -6 -13 38.34 1.55
 -3 6 13 38.25 1.56
 -3 -6 -13 39.11 1.52
 -3 6 -13 38.17 1.91
 -3 6 -13 40.25 1.85
 -3 -6 13 38.51 1.8
 3 -6 -13 37.9 1.79
 3 -6 -13 39.68 1.66
 4 6 -13 2.22 0.67
 4 6 -13 2.18 0.53
 -4 -6 -13 2.34 0.46
 -4 6 -13 2.4 0.65
 4 -6 -13 1.8 0.53
 -4 6 -13 2.23 0.58
 -4 -6 13 2.13 0.5
 5 6 -13 0.9 0.57
 -5 -6 -13 1.19 0.41
 -5 6 -13 0.9 0.45
 -5 6 -13 1.77 0.55
 -5 -6 13 0.97 0.47
 5 -6 -13 1.02 0.52
 -6 -6 -13 0.55 0.35
 6 6 -13 1.4 0.7
 -6 6 -13 1 0.6
 -6 6 -13 1.2 0.49
 0 -7 -13 23.37 0.92
 0 -7 -13 22.9 0.93
 0 7 -13 22.7 1.27
 0 7 13 22.54 0.9
 0 7 -13 24.67 1.29
 0 -7 -13 24.81 1
 0 7 -13 20.63 1.32
 1 7 -13 29.6 1.63
 -1 -7 -13 28.52 1.06
 -1 7 13 30.66 1.07
 1 7 -13 29.63 1.48
 -1 -7 -13 30.58 1.07
 -1 -7 -13 29.91 1.12
 1 -7 -13 28.49 1.15
 -1 7 -13 29.1 1.47
 -1 7 -13 29.78 1.46
 1 -7 -13 30.93 1.27
 -1 7 -13 30.24 1.6
 -1 -7 13 26.07 1.38
 -2 -7 -13 3.38 0.4
 -2 7 13 3.47 0.41
 -2 -7 -13 3.32 0.37
 -2 7 13 3.35 0.46
 2 7 -13 3.84 0.63
 2 7 -13 2.89 0.65
 -2 -7 13 3.82 0.59
 2 -7 -13 3.15 0.43
 -2 7 -13 3.17 0.57
 2 -7 -13 3.04 0.51
 -2 7 -13 2.27 0.49
 -2 7 -13 3.57 0.64
 3 7 -13 12.86 1.17
 -3 -7 -13 13.08 0.78
 -3 7 13 13.82 0.82
 3 7 -13 13.48 1.03
 -3 -7 -13 12.66 0.75
 -3 7 13 13.02 0.89
 -3 7 -13 13.7 1.1
 3 -7 -13 12.51 0.86
 -3 -7 13 12.64 1
 -3 7 -13 13.33 1.04
 3 -7 -13 12.94 0.98
 4 7 -13 4.38 0.86
 -4 -7 -13 4.08 0.54
 4 7 -13 4.89 0.78
 -4 7 -13 3.68 0.69
 4 -7 -13 3.97 0.71
 -4 7 -13 3.5 0.73
 -4 -7 13 3.7 0.68
 -5 -7 -13 7.64 0.83
 5 7 -13 4.54 0.94
 -5 7 -13 7.17 0.98
 -5 7 -13 6.79 1.07
 -5 -7 13 6.21 0.89
 0 8 -13 0.35 0.35
 0 8 -13 -0.06 0.24
 0 -8 -13 0.09 0.14
 0 -8 -13 0.27 0.16
 0 8 -13 0.21 0.29
 0 -8 -13 0.16 0.13
 1 8 -13 35.53 1.82
 -1 -8 -13 35.06 1.16
 -1 -8 -13 34.59 1.19
 -1 8 13 35.18 1.25
 -1 -8 -13 34.29 1.16
 1 8 -13 35.9 1.69
 1 -8 -13 35.29 1.36
 -1 -8 13 34.8 1.62
 -1 8 -13 33.2 1.75
 -1 8 -13 37.99 1.7
 -1 8 -13 35.84 1.68
 1 -8 -13 34.16 1.27
 -2 -8 -13 30.56 1.11
 -2 -8 -13 31.62 1.16
 -2 -8 -13 33.48 1.2
 2 8 -13 32.97 1.63
 -2 -8 -13 31.38 1.15
 -2 8 13 32.41 1.21
 -2 8 13 31.39 1.29
 2 8 -13 31.31 1.75
 -2 8 -13 34.16 1.62
 -2 -8 13 29.97 1.54
 2 -8 -13 31.55 1.31
 -2 8 -13 32.03 1.71
 2 -8 -13 33.94 1.46
 -2 8 -13 30.46 1.59
 3 8 -13 2.71 0.57
 -3 8 13 2.41 0.39
 3 8 -13 2.37 0.61
 -3 -8 -13 2.45 0.38
 -3 -8 13 2.13 0.5
 3 -8 -13 2.81 0.51
 3 -8 -13 2.58 0.46
 -3 8 -13 2.74 0.66
 -3 8 -13 2.79 0.6
 4 8 -13 7.26 1
 -4 -8 -13 5.74 0.62
 4 8 -13 5.84 1.04
 -4 8 -13 6.33 0.84
 -4 8 -13 7.09 1.05
 -4 -8 13 6.64 0.84
 -5 -8 -13 1.7 0.42
 5 8 -13 1.21 0.61
 -5 8 -13 2.11 0.59
 -5 -8 13 1.84 0.53
 -5 8 -13 2.7 0.76
 0 9 -13 15.96 1.07
 0 -9 -13 14.53 0.63
 0 9 -13 14.27 1.14
 0 9 -13 14.5 1.04
 0 -9 -13 14.78 0.61
 0 -9 -13 15.75 0.63
 1 9 -13 0.41 0.35
 -1 9 13 0.37 0.16
 -1 -9 -13 0.56 0.14
 1 9 -13 0.62 0.34
 -1 -9 -13 0.56 0.13
 -1 -9 -13 0.62 0.15
 -1 -9 -13 0.6 0.15
 -1 9 -13 0.75 0.34
 1 -9 -13 0.58 0.18
 -1 9 -13 0.3 0.3
 1 -9 -13 0.49 0.21
 -1 9 -13 1.23 0.44
 -2 -9 -13 0.23 0.15
 -2 -9 -13 -0.05 0.11
 2 9 -13 -0.14 0.32
 -2 9 13 -0.09 0.1
 2 9 -13 -0.01 0.25
 -2 -9 -13 0.17 0.14
 -2 9 13 0.06 0.14
 -2 -9 -13 0.21 0.13
 -2 9 -13 0.56 0.34
 -2 -9 13 -0.11 0.22
 2 -9 -13 -0.2 0.15
 2 -9 -13 0.07 0.21
 -2 9 -13 0.36 0.29
 -2 9 -13 -0.04 0.3
 -3 9 13 0.05 0.16
 -3 -9 -13 -0.2 0.15
 3 -9 13 -0.01 0.24
 3 9 -13 0.12 0.31
 3 9 -13 0.68 0.39
 3 -9 -13 -0.07 0.2
 -3 -9 13 -0.31 0.21
 -3 9 -13 0.56 0.36
 -3 9 -13 -0.12 0.27
 4 9 -13 6.89 1.08
 -4 -9 -13 7.89 0.64
 -4 9 -13 8.18 1.03
 -4 9 -13 6.65 0.99
 -4 -9 13 7.58 0.98
 -5 -9 -13 0.5 0.29
 5 9 -13 0.85 0.6
 -5 9 -13 0.55 0.46
 -5 -9 13 0.86 0.41
 -5 9 -13 1.2 0.51
 0 10 -13 8.8 1.05
 0 -10 -13 9.67 0.42
 0 10 -13 10.47 0.89
 0 -10 -13 9.21 0.41
 0 10 -13 10.05 0.88
 -1 10 13 4.22 0.3
 1 10 -13 5.12 0.74
 1 10 -13 5.64 0.86
 -1 10 -13 4.78 0.79
 1 -10 -13 4.63 0.37
 1 -10 -13 4.9 0.38
 -1 10 -13 4.34 0.69
 -1 10 -13 5.22 0.76
 -2 -10 -13 0.96 0.17
 2 10 -13 0.72 0.35
 -2 -10 -13 1.11 0.18
 -2 10 13 0.79 0.19
 2 10 -13 1.02 0.43
 -2 -10 -13 1.13 0.19
 -2 10 -13 0.65 0.41
 -2 -10 13 1.22 0.4
 -2 10 -13 1.09 0.46
 -2 10 -13 1.56 0.45
 2 -10 -13 0.87 0.26
 -3 -10 -13 0.69 0.21
 3 10 -13 0.3 0.42
 3 -10 13 0.87 0.31
 -3 -10 13 1.05 0.41
 -3 10 -13 0.95 0.47
 3 -10 -13 0.82 0.3
 -3 10 -13 1.05 0.44
 4 10 -13 3.21 0.79
 -4 -10 -13 2.58 0.42
 -4 10 -13 2.8 0.64
 -4 10 -13 2.17 0.62
 -4 -10 13 3.75 0.72
 -5 -10 -13 2.61 0.49
 5 10 -13 2.78 0.81
 -5 -10 13 3.14 0.7
 -5 10 -13 4.43 0.89
 0 11 -13 8.06 0.94
 0 11 -13 8.36 1.03
 0 11 -13 10.05 0.87
 1 11 -13 1.97 0.51
 1 11 -13 1.8 0.57
 -1 11 -13 1.79 0.5
 -1 11 -13 1.3 0.49
 -1 11 -13 2.09 0.51
 1 -11 -13 1.47 0.23
 2 11 -13 4.52 0.81
 -2 11 -13 4.05 0.69
 2 -11 -13 4.91 0.45
 -2 11 -13 4.67 0.83
 -2 11 -13 6.18 0.83
 -2 -11 13 4.76 0.68
 -3 -11 -13 11.49 0.59
 3 11 -13 11.69 1.36
 -3 11 -13 8.39 1.11
 -3 11 -13 11.29 1.04
 3 -11 -13 12.16 0.8
 -3 -11 13 11.56 1.01
 -4 -11 -13 0.12 0.2
 4 11 -13 0.02 0.44
 -4 11 -13 0 0.37
 -4 -11 13 -0.15 0.32
 0 12 -13 13.63 1.06
 0 12 -13 12.91 1.15
 1 12 -13 6.44 0.94
 1 12 -13 7.63 0.93
 -1 12 -13 10.41 1.21
 -1 12 -13 11.39 1.17
 1 -12 -13 9.63 0.45
 2 12 -13 3.66 0.75
 -2 12 -13 4.88 0.81
 2 -12 -13 3.72 0.42
 -2 -12 13 4.84 0.74
 -2 12 -13 4.76 0.86
 -3 -12 -13 0.41 0.15
 3 12 -13 0 0.34
 -3 -12 13 0.14 0.31
 -3 12 -13 0.39 0.44
 -4 -12 -13 3.02 0.41
 4 12 -13 2.18 0.74
 -4 -12 13 2.21 0.59
 -4 12 -13 3.29 0.81
 0 13 -13 6.31 0.96
 1 13 -13 6.26 0.96
 1 -13 -13 5.56 0.3
 -1 13 -13 6 0.97
 2 13 -13 1.27 0.53
 -2 13 -13 1.57 0.54
 -2 -13 13 3.27 0.65
 2 -13 -13 2.34 0.33
 -3 -13 -13 5.78 0.3
 3 13 -13 5.19 0.93
 -3 -13 13 4.18 0.75
 -3 13 -13 6.05 0.99
 0 14 -13 18.61 1.41
 1 14 -13 2.85 0.73
 -1 14 -13 3.64 0.82
 2 14 -13 0.96 0.53
 2 -14 -13 0.73 0.22
 -2 -14 13 -0.17 0.27
 -2 14 -13 0.47 0.46
 3 14 -13 0.88 0.55
 -3 -14 13 1.19 0.44
 -3 14 -13 1.25 0.54
 0 15 -13 0.29 0.39
 1 15 -13 1.4 0.58
 -1 15 -13 3.26 0.79
 2 15 -13 6.97 1.15
 -2 15 -13 8.07 1.19
 2 -15 -13 5.88 0.43
 0 16 -13 -0.14 0.42
 1 16 -13 -0.39 0.36
 -1 16 -13 -0.16 0.38
 1 0 14 26.23 1.32
 -1 0 -14 26.15 1.32
 -1 0 14 27.49 1.34
 -1 0 14 27.68 1.24
 -1 0 -14 28.93 1.27
 1 0 -14 27.85 1.41
 -1 0 -14 26.83 1.26
 1 0 -14 26.26 1.27
 2 0 -14 45.79 1.88
 -2 0 14 49.94 1.99
 -2 0 -14 45.52 1.82
 -2 0 -14 45.22 1.9
 2 0 -14 46.35 2.05
 3 0 -14 15.13 1.05
 -3 0 14 17.29 1.04
 -3 0 -14 15.43 1.01
 -3 0 14 16.75 1.13
 3 0 -14 15.39 1.16
 -3 0 -14 15.72 1.07
 4 0 -14 0.04 0.38
 -4 0 -14 0.3 0.29
 -4 0 14 0.45 0.39
 -4 0 -14 0.26 0.28
 -5 0 -14 0.3 0.36
 -5 0 -14 1.13 0.48
 5 0 -14 0.27 0.42
 -6 0 -14 12.75 1.14
 -6 0 -14 11.19 1.33
 6 0 -14 10.91 1.42
 0 1 14 2.59 0.46
 0 -1 -14 2.45 0.41
 0 -1 14 2.1 0.44
 0 1 -14 2.63 0.53
 0 -1 -14 2.15 0.44
 0 1 -14 3.1 0.55
 0 1 -14 2.37 0.42
 -1 1 14 6.89 0.59
 -1 -1 -14 7.38 0.67
 1 -1 14 8.39 0.74
 -1 1 14 8.42 0.7
 1 1 -14 8.23 0.75
 -1 -1 -14 8.88 0.67
 1 1 -14 8.59 0.7
 -1 -1 -14 7.75 0.62
 -1 1 -14 8.96 0.76
 -1 -1 14 8.53 0.74
 1 -1 -14 7.7 0.83
 1 -1 -14 6.79 0.63
 -1 1 -14 8.41 0.68
 -1 1 -14 6.95 0.65
 1 1 14 8.07 0.69
 -2 -1 -14 -0.04 0.22
 -2 -1 -14 -0.2 0.22
 -2 1 14 -0.1 0.17
 -2 1 14 0.25 0.27
 2 1 -14 0.09 0.23
 2 1 -14 0.13 0.3
 2 -1 -14 0.02 0.27
 -2 1 -14 0.13 0.27
 2 -1 -14 0.22 0.23
 -2 -1 14 0.12 0.19
 -2 1 -14 -0.1 0.21
 -2 -1 14 0.17 0.28
 -3 1 14 1.6 0.45
 3 1 -14 3.14 0.69
 3 1 -14 1.69 0.42
 -3 -1 -14 1.98 0.45
 -3 -1 -14 1.58 0.42
 -3 1 -14 1.93 0.45
 -3 1 -14 1.02 0.36
 3 -1 -14 1.53 0.48
 -3 -1 14 0.78 0.32
 3 -1 -14 1.43 0.43
 -3 -1 14 0.79 0.39
 -4 1 14 8.28 1.01
 4 1 -14 7.71 1.04
 -4 -1 -14 7.87 0.95
 -4 -1 -14 10.66 0.87
 -4 -1 14 7.5 0.87
 -4 1 -14 8.47 1.01
 4 -1 -14 9.89 1.14
 -4 1 -14 9.66 1.01
 -5 -1 -14 2.46 0.59
 -5 -1 -14 2.84 0.62
 5 1 -14 3.09 0.78
 5 -1 -14 2.82 0.75
 -5 1 -14 3.76 0.76
 -5 1 -14 3.18 0.62
 -6 -1 -14 5.78 0.87
 6 1 -14 6.13 1.12
 6 -1 -14 6.29 1.11
 -6 1 -14 6.29 1.02
 -6 1 -14 6.84 0.95
 0 2 14 4.12 0.54
 0 -2 -14 4.62 0.53
 0 -2 14 5.38 0.68
 0 2 -14 3.56 0.6
 0 2 -14 5.88 0.67
 0 2 -14 5.78 0.74
 0 -2 -14 5.81 0.65
 1 2 -14 37.61 1.77
 -1 2 14 38.13 1.6
 -1 -2 -14 37.68 1.59
 -1 -2 -14 39.69 1.51
 1 2 -14 37.57 1.64
 -1 2 14 39.83 1.52
 -1 -2 -14 38.71 1.53
 1 -2 14 40.16 1.75
 1 2 14 38.39 1.6
 -1 2 -14 36.69 1.62
 -1 2 -14 39.6 1.64
 -1 2 -14 39.15 1.74
 -1 -2 14 40.01 1.63
 1 -2 -14 38.68 1.69
 -1 -2 14 38.89 1.72
 1 -2 -14 40.08 1.58
 -2 -2 -14 16.27 0.99
 -2 -2 -14 17.91 0.96
 -2 2 14 16.77 0.93
 2 2 -14 15.57 1.16
 2 2 -14 18.14 1.08
 -2 2 14 15.65 1
 -2 -2 14 17.27 1.13
 -2 2 -14 17.11 1.05
 2 -2 -14 17.03 1
 -2 -2 14 15.58 0.98
 2 -2 -14 16.45 1.1
 -2 2 -14 16.91 1.1
 -3 2 14 4.72 0.68
 3 2 -14 3.98 0.75
 -3 -2 -14 5.64 0.65
 -3 2 14 4.46 0.58
 -3 -2 -14 5.9 0.72
 3 2 -14 6.12 0.78
 -3 2 -14 3.88 0.6
 -3 2 -14 4.39 0.68
 -3 -2 14 4.87 0.72
 -3 -2 14 6.24 0.76
 3 -2 -14 5.57 0.83
 3 -2 -14 5.71 0.7
 4 2 -14 8.81 1.14
 -4 -2 -14 7.86 0.93
 -4 2 14 7.95 0.97
 -4 -2 -14 7.12 0.79
 -4 2 -14 6.95 0.86
 -4 2 -14 5.73 0.84
 -4 -2 14 7.45 0.9
 4 -2 -14 6.24 0.89
 5 2 -14 0.23 0.49
 -5 -2 -14 0.88 0.44
 -5 -2 -14 0.42 0.37
 5 -2 -14 -0.14 0.33
 -5 2 -14 0.82 0.44
 -5 2 -14 0.48 0.44
 -6 -2 -14 1.78 0.54
 6 2 -14 0.44 0.46
 -6 2 -14 1.53 0.54
 -6 2 -14 1 0.54
 6 -2 -14 1.6 0.62
 0 -3 14 0.32 0.29
 0 3 -14 0.3 0.24
 0 -3 -14 0.17 0.21
 0 -3 -14 0.21 0.25
 0 3 14 0.4 0.24
 0 3 -14 0.35 0.29
 0 3 -14 -0.02 0.27
 1 3 -14 2.66 0.59
 -1 -3 -14 4.58 0.57
 1 -3 14 5.35 0.73
 -1 -3 -14 5.4 0.56
 1 3 -14 5.18 0.67
 -1 3 14 4.63 0.51
 -1 3 14 4.66 0.58
 -1 -3 -14 4.13 0.48
 -1 -3 14 4.34 0.63
 -1 3 -14 4.99 0.64
 1 -3 -14 4.84 0.55
 1 3 14 4.59 0.56
 -1 3 -14 3.55 0.59
 1 -3 -14 5.39 0.68
 -1 -3 14 3.88 0.56
 -1 3 -14 4.97 0.61
 2 3 -14 1.18 0.38
 -2 3 14 1.26 0.3
 -2 3 14 0.58 0.27
 -2 -3 -14 1.19 0.31
 2 -3 14 1.42 0.41
 -2 -3 -14 1.62 0.38
 2 3 -14 1.26 0.47
 2 -3 -14 0.88 0.38
 -2 -3 14 1.24 0.36
 2 -3 -14 1.48 0.36
 -2 3 -14 1.7 0.5
 -2 3 -14 2.14 0.47
 -2 -3 14 1.63 0.46
 -2 3 -14 1.4 0.39
 -3 3 14 2.56 0.45
 -3 -3 -14 2.64 0.46
 -3 3 14 3 0.55
 3 3 -14 3.84 0.63
 3 3 -14 3.43 0.7
 -3 -3 -14 3.2 0.52
 3 -3 -14 3.64 0.58
 -3 3 -14 2.63 0.51
 3 -3 -14 2.62 0.59
 -3 -3 14 2.57 0.51
 -3 3 -14 2.5 0.57
 -4 -3 -14 4 0.59
 4 3 -14 2.1 0.64
 -4 -3 -14 4.44 0.67
 -4 3 14 3.19 0.65
 -4 3 -14 4.03 0.73
 -4 3 -14 3.3 0.64
 4 -3 -14 2.47 0.66
 -4 -3 14 2.97 0.59
 5 3 -14 4.01 0.94
 -5 -3 -14 5.53 0.78
 -5 3 -14 3.9 0.73
 -5 3 -14 4.36 0.79
 5 -3 -14 3.19 0.75
 6 3 -14 1.43 0.6
 -6 -3 -14 1.36 0.48
 -6 3 -14 1.24 0.59
 6 -3 -14 0.56 0.55
 -6 3 -14 1.28 0.55
 0 -4 14 2.69 0.55
 0 -4 -14 2.31 0.42
 0 4 -14 3.14 0.54
 0 4 14 2.25 0.38
 0 4 -14 2.4 0.53
 0 4 -14 3.4 0.61
 0 -4 -14 2.69 0.39
 1 4 -14 17.32 1.06
 1 4 -14 17.59 1.19
 -1 4 14 16.93 0.85
 -1 -4 -14 17.26 0.87
 -1 4 14 18.34 0.95
 1 -4 14 16.3 1.11
 -1 -4 -14 17.63 0.87
 -1 -4 -14 17.44 0.93
 -1 -4 14 17.73 1.03
 -1 4 -14 18.49 1.09
 1 -4 -14 17.97 1.03
 1 4 14 17.36 0.9
 -1 4 -14 17.53 1.05
 -1 -4 14 18.03 1.14
 1 -4 -14 17.33 0.92
 -1 4 -14 15.77 1.09
 -2 4 14 20.01 1.08
 -2 4 14 19.94 0.99
 2 -4 14 19.06 1.22
 -2 -4 -14 19.16 1.02
 2 4 -14 20.92 1.21
 -2 -4 -14 20.15 0.99
 2 4 -14 19.63 1.32
 -2 4 -14 20.47 1.27
 -2 4 -14 18.95 1.12
 -2 -4 14 20.89 1.27
 2 -4 -14 20.12 1.07
 -2 -4 14 17.7 1.09
 2 -4 -14 22.63 1.24
 -2 4 -14 18.73 1.15
 -3 4 14 9.54 0.73
 -3 -4 -14 10.48 0.78
 -3 4 14 8.33 0.78
 -3 -4 -14 9.13 0.71
 3 4 -14 9.56 0.86
 3 4 -14 8.9 1.11
 3 -4 -14 8.86 0.77
 -3 4 -14 9.98 1.05
 -3 4 -14 6.79 0.88
 3 -4 -14 9.5 1.03
 -3 -4 14 9.71 0.84
 -4 4 14 0.04 0.26
 4 4 -14 -0.15 0.32
 -4 -4 -14 0.1 0.3
 -4 -4 -14 0.38 0.29
 4 -4 -14 0.05 0.35
 -4 4 -14 -0.15 0.29
 -4 4 -14 0.07 0.29
 -4 -4 14 0.55 0.31
 -5 -4 -14 3.59 0.6
 5 4 -14 1.59 0.75
 -5 4 -14 2.76 0.68
 -5 4 -14 3.4 0.77
 5 -4 -14 2.84 0.71
 0 5 -14 18.77 1.15
 0 5 14 19.07 0.91
 0 -5 -14 19.64 0.99
 0 -5 -14 17.35 0.87
 0 5 -14 18.48 1.19
 0 -5 14 20.3 1.23
 0 5 -14 18.61 1.1
 0 -5 -14 18.58 0.93
 -1 -5 -14 16.24 0.88
 1 -5 14 16.92 1.16
 -1 5 14 16.27 0.88
 -1 5 14 17.76 0.83
 1 5 -14 17.3 1.22
 -1 -5 -14 17.02 0.83
 1 5 -14 19.76 1.14
 -1 -5 -14 17.85 0.86
 1 -5 -14 17.66 1
 -1 -5 14 19.36 1.21
 -1 5 -14 16.88 1.08
 1 -5 -14 18.22 0.91
 -1 5 -14 16.74 1.05
 -1 -5 14 16.85 1.03
 -1 5 -14 16.79 1.16
 -2 5 14 29.14 1.23
 2 5 -14 28.94 1.65
 -2 -5 -14 28.09 1.2
 2 -5 14 32.94 1.64
 -2 -5 -14 27.86 1.25
 -2 5 14 29.04 1.33
 2 5 -14 27.86 1.48
 -2 -5 -14 28.26 1.18
 -2 -5 14 29.53 1.46
 -2 5 -14 31.55 1.5
 -2 5 -14 29.11 1.58
 -2 5 -14 29.28 1.49
 2 -5 -14 28.96 1.45
 2 -5 -14 28.63 1.31
 -3 5 14 0.42 0.31
 -3 -5 -14 -0.01 0.21
 3 5 -14 -0.31 0.25
 -3 -5 -14 1.04 0.31
 3 5 -14 1.52 0.53
 -3 5 14 0.46 0.25
 3 -5 -14 0.53 0.29
 -3 -5 14 0.22 0.25
 3 -5 -14 0.26 0.32
 -3 5 -14 1.17 0.45
 -3 5 -14 1.1 0.44
 4 5 -14 3.71 0.84
 -4 -5 -14 4.61 0.61
 -4 -5 14 3.12 0.6
 4 -5 -14 4.91 0.8
 -4 5 -14 4.26 0.68
 -4 5 -14 3.52 0.7
 -5 -5 -14 3.08 0.57
 5 5 -14 4.07 0.88
 -5 5 -14 3.36 0.78
 -5 5 -14 3.94 0.76
 5 -5 -14 2.31 0.65
 0 -6 -14 25.02 1.05
 0 6 -14 26.51 1.48
 0 6 -14 26.52 1.36
 0 -6 14 26.15 1.46
 0 -6 -14 25.47 1.08
 0 -6 -14 25 1.13
 0 6 -14 25.29 1.36
 1 -6 14 2.53 0.63
 -1 -6 -14 2.28 0.33
 1 6 -14 1.62 0.54
 -1 -6 -14 2.24 0.36
 1 6 -14 2.53 0.49
 -1 6 14 2.22 0.35
 -1 -6 -14 2.16 0.33
 -1 6 -14 3.1 0.55
 -1 -6 14 1.98 0.42
 -1 6 -14 3.36 0.63
 1 -6 -14 2.56 0.37
 -1 6 -14 2.26 0.45
 1 -6 -14 1.7 0.37
 -2 -6 -14 10.75 0.63
 -2 -6 -14 11.01 0.7
 -2 6 14 10.03 0.72
 -2 6 14 11.13 0.68
 2 6 -14 12.65 1.06
 -2 -6 -14 11.02 0.66
 2 6 -14 11.85 0.94
 2 -6 -14 11.49 0.77
 -2 6 -14 10.83 0.98
 -2 6 -14 10.6 0.86
 2 -6 -14 10.34 0.84
 -2 -6 14 10.71 0.86
 -2 6 -14 10.31 0.9
 -3 -6 -14 2.54 0.43
 -3 6 14 1.54 0.35
 -3 6 14 2.11 0.48
 3 6 -14 1.58 0.55
 -3 -6 -14 1.48 0.33
 3 6 -14 0.75 0.38
 -3 -6 14 1.73 0.49
 3 -6 -14 1.46 0.39
 3 -6 -14 1.94 0.49
 -3 6 -14 2.5 0.62
 -3 6 -14 1.25 0.46
 -4 -6 -14 9.1 0.75
 4 6 -14 7.64 1.1
 -4 6 -14 7.98 1.04
 -4 6 -14 6.36 0.86
 -4 -6 14 7.9 0.94
 4 -6 -14 11.1 1.02
 -5 -6 -14 6.13 0.77
 5 6 -14 6.43 1.15
 -5 6 -14 8.97 1.08
 -5 6 -14 7.95 1.1
 1 7 -14 0.86 0.44
 -1 -7 -14 0.69 0.2
 1 7 -14 0.73 0.34
 -1 -7 -14 0.97 0.22
 -1 -7 -14 0.89 0.25
 -1 7 14 0.42 0.16
 -1 7 -14 0.69 0.42
 -1 7 -14 0.59 0.34
 -1 -7 14 0.25 0.29
 1 -7 -14 0.84 0.29
 1 -7 -14 0.74 0.23
 -1 7 -14 0.86 0.35
 -2 7 14 2.76 0.38
 -2 -7 -14 1.99 0.35
 -2 7 14 2.42 0.41
 -2 -7 -14 2.54 0.36
 2 7 -14 3.43 0.73
 2 7 -14 3.41 0.61
 -2 -7 -14 2.72 0.35
 -2 7 -14 3.15 0.59
 -2 -7 14 1.44 0.43
 -2 7 -14 2.22 0.57
 2 -7 -14 2.36 0.39
 -2 7 -14 2.24 0.52
 2 -7 -14 3.44 0.56
 3 7 -14 5.97 0.93
 3 7 -14 7 0.85
 -3 -7 -14 7.4 0.59
 3 -7 -14 8.26 0.71
 -3 7 -14 8 1.05
 -3 -7 14 6.97 0.87
 3 -7 -14 7.74 0.89
 -3 7 -14 8.78 0.97
 -4 -7 -14 0.28 0.26
 4 7 -14 0.64 0.5
 -4 -7 14 0.35 0.33
 -4 7 -14 -0.15 0.3
 -4 7 -14 0.7 0.47
 -5 -7 -14 1.85 0.47
 5 7 -14 1.11 0.61
 -5 7 -14 2.7 0.73
 -5 7 -14 0.85 0.43
 0 8 -14 44.85 2.16
 0 -8 -14 49.39 1.59
 0 -8 -14 48.56 1.59
 0 -8 -14 49.3 1.67
 0 8 -14 50.27 2.11
 0 8 14 51.36 1.56
 0 8 -14 50.71 2.11
 -1 8 14 4.77 0.41
 -1 -8 -14 3.95 0.36
 -1 -8 -14 3.74 0.34
 -1 -8 -14 4.81 0.4
 1 8 -14 4.07 0.72
 1 8 -14 4.02 0.65
 1 -8 -14 5.04 0.44
 -1 8 -14 5.35 0.73
 -1 8 -14 4.83 0.73
 1 -8 -14 3.73 0.47
 -1 8 -14 4.99 0.81
 2 8 -14 0.51 0.45
 -2 -8 -14 1.83 0.28
 -2 -8 -14 1.98 0.28
 -2 8 14 0.7 0.29
 -2 -8 -14 1.71 0.29
 2 8 -14 3.1 0.62
 -2 8 14 2.08 0.32
 -2 8 -14 3.18 0.63
 -2 -8 14 1.42 0.43
 -2 8 -14 1.14 0.45
 -2 8 -14 1.56 0.5
 2 -8 -14 1.36 0.38
 2 -8 -14 1.89 0.36
 3 8 -14 5.98 0.97
 -3 -8 -14 5.37 0.5
 3 8 -14 6.05 0.82
 3 -8 -14 6.85 0.64
 -3 8 -14 5.72 0.92
 -3 8 -14 6.31 0.84
 -3 -8 14 5.71 0.83
 -4 -8 -14 0.62 0.28
 4 8 -14 0.97 0.61
 -4 8 -14 1.02 0.47
 -4 -8 14 0.53 0.36
 -4 8 -14 2.45 0.61
 -5 -8 -14 2.85 0.53
 5 8 -14 2.1 0.75
 -5 8 -14 2.06 0.64
 -5 8 -14 2.69 0.65
 0 -9 -14 6.78 0.42
 0 9 -14 10.87 1.07
 0 -9 -14 6.8 0.44
 0 -9 -14 6.32 0.41
 0 9 -14 6.87 0.84
 0 9 -14 6.25 0.92
 -1 9 14 4.3 0.36
 -1 -9 -14 4.55 0.33
 -1 -9 -14 4.99 0.35
 1 9 -14 4.61 0.78
 1 9 -14 4.53 0.7
 -1 -9 -14 4.79 0.34
 -1 9 -14 6.5 0.85
 1 -9 -14 4.58 0.42
 -1 9 -14 4.79 0.81
 -1 9 -14 5.43 0.74
 1 -9 -14 4.18 0.48
 2 9 -14 3.85 0.79
 -2 -9 -14 2.73 0.31
 -2 9 14 2.84 0.35
 -2 -9 -14 2.99 0.34
 -2 -9 -14 3.13 0.35
 2 9 -14 2.72 0.56
 2 -9 -14 2.53 0.39
 -2 9 -14 1.87 0.51
 -2 9 -14 3.18 0.65
 -2 -9 14 1.98 0.51
 -2 9 -14 1.56 0.57
 3 9 -14 1.28 0.39
 -3 -9 -14 1.22 0.28
 3 9 -14 1.43 0.58
 -3 -9 14 1.32 0.43
 -3 9 -14 1.1 0.51
 3 -9 -14 1.69 0.39
 -3 9 -14 1.39 0.46
 4 9 -14 5.18 0.97
 -4 -9 -14 5.12 0.59
 -4 9 -14 7.28 1.09
 -4 9 -14 7.04 0.96
 -4 -9 14 5.52 0.84
 -5 -9 -14 0.71 0.32
 5 9 -14 -0.11 0.47
 -5 9 -14 0.48 0.49
 -5 9 -14 1.47 0.56
 0 -10 -14 3.72 0.28
 0 10 -14 3.09 0.65
 0 10 -14 4.16 0.65
 0 -10 -14 3.81 0.29
 0 10 -14 4.76 0.73
 -1 -10 -14 6.9 0.34
 1 10 -14 5.46 0.82
 -1 -10 -14 6.92 0.34
 1 10 -14 8.95 1
 -1 10 14 7.62 0.42
 1 10 -14 7.89 1.02
 -1 10 -14 8.65 0.95
 1 -10 -14 7.49 0.48
 -1 10 -14 8.11 1.01
 -1 10 -14 9.1 1.01
 2 10 -14 0.95 0.38
 2 10 -14 1.86 0.55
 -2 -10 -14 1.59 0.23
 -2 -10 -14 2.11 0.25
 -2 -10 -14 1.18 0.2
 -2 10 -14 2.19 0.55
 -2 10 -14 1.49 0.55
 -2 10 -14 1.56 0.51
 2 -10 -14 1.9 0.36
 -2 -10 14 1.25 0.42
 -3 -10 -14 5.05 0.45
 3 10 -14 4.87 0.96
 -3 -10 14 5.76 0.85
 -3 10 -14 4.53 0.83
 -3 10 -14 5.64 0.89
 4 10 -14 -0.25 0.34
 -4 -10 -14 0 0.19
 -4 -10 14 0.39 0.37
 -4 10 -14 -0.51 0.25
 -4 10 -14 0.16 0.37
 0 11 -14 0.45 0.39
 0 11 -14 0.73 0.38
 0 11 -14 0.64 0.38
 1 11 -14 2.68 0.59
 1 11 -14 5.59 0.94
 -1 11 -14 5.38 0.75
 -1 11 -14 4.26 0.85
 -1 11 -14 4.81 0.78
 1 -11 -14 4.04 0.34
 -2 -11 -14 3.17 0.23
 2 11 -14 2.97 0.69
 -2 11 -14 3.85 0.79
 -2 11 -14 4.16 0.74
 -2 -11 14 4.52 0.72
 2 -11 -14 3.9 0.46
 3 11 -14 13.56 1.27
 -3 -11 -14 13.28 0.66
 -3 -11 14 12.55 1.1
 -3 11 -14 13.37 1.45
 -3 11 -14 14.04 1.16
 4 11 -14 0.55 0.53
 -4 -11 -14 1.73 0.34
 -4 -11 14 3.5 0.74
 -4 11 -14 2.74 0.74
 0 12 -14 4.12 0.7
 0 12 -14 2.61 0.63
 1 12 -14 3.71 0.76
 1 12 -14 3.39 0.61
 1 -12 -14 4.56 0.32
 -1 12 -14 4.86 0.83
 -1 12 -14 5.22 0.79
 2 12 -14 9.81 1.24
 -2 -12 14 11.57 1.2
 -2 12 -14 10.82 1.01
 -2 12 -14 11.77 1.36
 2 -12 -14 11.36 0.66
 -3 -12 -14 4.53 0.34
 3 12 -14 5.45 1.01
 -3 -12 14 4.73 0.83
 -3 12 -14 3.88 0.84
 0 13 -14 1.1 0.54
 1 13 -14 1.32 0.59
 1 -13 -14 2.44 0.21
 -1 13 -14 2.44 0.65
 2 13 -14 1.04 0.56
 -2 13 -14 0.16 0.4
 2 -13 -14 0.29 0.17
 -2 -13 14 0.27 0.36
 3 13 -14 -0.04 0.37
 -3 13 -14 0.63 0.5
 -3 -13 14 0.94 0.46
 0 14 -14 9.13 1.17
 1 14 -14 2.92 0.79
 -1 14 -14 2.76 0.74
 2 14 -14 5.08 0.98
 2 -14 -14 3.76 0.4
 -2 14 -14 4.08 0.85
 0 15 -14 17.82 1.46
 1 15 -14 0.99 0.57
 -1 15 -14 -0.21 0.39
 0 0 -15 2.74 0.48
 0 0 -15 2.5 0.43
 1 0 -15 0.81 0.32
 -1 0 -15 0.59 0.29
 1 0 15 0.74 0.3
 -1 0 -15 0.26 0.28
 -1 0 15 1.09 0.32
 -1 0 -15 0.44 0.26
 1 0 -15 -0.05 0.3
 -1 0 15 0.65 0.31
 -2 0 -15 14.25 0.9
 2 0 -15 12.62 1.01
 -2 0 -15 13.61 0.92
 -2 0 -15 14.56 0.99
 -2 0 15 14.88 0.9
 -2 0 15 13.92 0.99
 2 0 -15 12.42 0.91
 3 0 -15 0.14 0.27
 -3 0 -15 0.65 0.37
 3 0 -15 -0.07 0.32
 -3 0 15 0.07 0.3
 -3 0 -15 -0.05 0.24
 -3 0 15 0.03 0.21
 -4 0 -15 6.86 0.92
 4 0 -15 5.9 0.98
 -4 0 -15 5.57 0.79
 -5 0 -15 0.85 0.49
 5 0 -15 1.76 0.64
 -5 0 -15 0.66 0.43
 0 1 15 0.46 0.26
 0 -1 -15 0.49 0.3
 0 1 -15 0.33 0.27
 0 -1 -15 -0.09 0.21
 0 -1 15 0.01 0.22
 0 1 -15 0.11 0.25
 0 1 -15 0.2 0.27
 0 -1 -15 0.95 0.32
 1 -1 15 7.7 0.85
 1 1 -15 6.54 0.81
 -1 -1 -15 6.1 0.64
 -1 1 15 6.07 0.7
 -1 -1 -15 7.55 0.65
 -1 1 15 7 0.6
 1 1 -15 7.16 0.76
 -1 -1 -15 7.84 0.71
 1 -1 -15 6.91 0.8
 1 1 15 6.52 0.74
 -1 1 -15 7.25 0.82
 -1 1 -15 6.42 0.7
 -1 -1 15 8.19 0.73
 -1 1 -15 7.89 0.67
 1 -1 -15 7 0.64
 -2 1 15 4.81 0.59
 -2 -1 -15 4.67 0.65
 -2 1 15 3.25 0.56
 -2 -1 -15 4.16 0.53
 2 1 -15 4.29 0.69
 2 1 -15 3.4 0.54
 -2 -1 -15 5.73 0.65
 2 -1 -15 2.6 0.59
 -2 -1 15 5.06 0.65
 -2 -1 15 3.98 0.65
 2 -1 -15 3.71 0.55
 -2 1 -15 4.33 0.62
 -2 1 -15 3.21 0.51
 -2 1 -15 3.97 0.62
 -3 1 15 4.55 0.69
 3 1 -15 4.97 0.72
 -3 -1 -15 5.96 0.72
 -3 1 15 4.68 0.62
 -3 -1 -15 5.84 0.75
 3 1 -15 6.07 0.92
 -3 1 -15 5.28 0.73
 3 -1 -15 6.69 0.93
 3 -1 -15 4.76 0.66
 -3 -1 15 5.58 0.72
 -3 -1 15 6.59 0.87
 -3 1 -15 5.71 0.78
 -4 1 15 1.61 0.5
 4 1 -15 1.73 0.61
 -4 -1 -15 1.98 0.56
 -4 -1 -15 1.8 0.47
 4 -1 -15 1.96 0.6
 -4 1 -15 2.44 0.57
 -4 1 -15 1.71 0.5
 -5 -1 -15 10.01 1.18
 -5 -1 -15 7.8 0.97
 5 1 -15 8.79 1.28
 -5 1 -15 8.89 1.12
 -5 1 -15 8.2 0.99
 5 -1 -15 8.28 1.18
 0 -2 15 6.83 0.79
 0 2 15 6.79 0.62
 0 2 -15 7.16 0.67
 0 2 -15 6.66 0.78
 0 -2 -15 7.52 0.69
 0 -2 -15 7.81 0.79
 0 2 -15 8.68 0.9
 0 -2 -15 7.11 0.61
 -1 -2 -15 5.08 0.59
 -1 -2 -15 5.67 0.6
 -1 -2 -15 4.99 0.63
 -1 2 15 5.63 0.64
 1 -2 15 5.71 0.74
 1 2 -15 5.63 0.67
 1 2 -15 5.6 0.75
 -1 2 15 5.23 0.57
 1 -2 -15 4.98 0.59
 -1 -2 15 5.74 0.72
 -1 2 -15 5.5 0.64
 1 -2 -15 4.52 0.66
 -1 -2 15 5.91 0.68
 -1 2 -15 4.15 0.6
 1 2 15 5.85 0.67
 -1 2 -15 5.07 0.72
 -2 2 15 6.08 0.74
 2 2 -15 6.61 0.79
 -2 -2 -15 6.96 0.61
 2 2 -15 7.77 0.98
 -2 -2 -15 5.63 0.68
 -2 2 15 6.09 0.66
 -2 -2 -15 6.13 0.65
 -2 2 -15 6.72 0.79
 -2 2 -15 6.47 0.79
 2 -2 -15 6.89 0.84
 -2 -2 15 5.14 0.64
 -2 2 -15 7.63 0.81
 -2 -2 15 6.34 0.8
 2 -2 -15 5.25 0.63
 -3 2 15 0.25 0.3
 3 2 -15 0.88 0.47
 -3 2 15 0.87 0.33
 -3 -2 -15 0.91 0.35
 3 2 -15 1.34 0.44
 -3 -2 -15 0.91 0.36
 -3 -2 15 0.52 0.36
 3 -2 -15 0.71 0.33
 -3 2 -15 1.04 0.42
 3 -2 -15 0.63 0.39
 -3 2 -15 1.73 0.48
 -3 -2 15 0.39 0.29
 -4 -2 -15 3.01 0.61
 -4 2 15 3.21 0.62
 -4 -2 -15 3.22 0.61
 4 2 -15 2.08 0.61
 -4 2 -15 2.93 0.58
 -4 2 -15 3.13 0.62
 4 -2 -15 1.63 0.54
 -5 -2 -15 2.18 0.53
 5 2 -15 2.45 0.7
 -5 2 -15 2.02 0.54
 -5 2 -15 1.9 0.55
 5 -2 -15 1.78 0.62
 0 3 -15 22.72 1.32
 0 -3 -15 20.95 1.06
 0 -3 -15 22.32 1.17
 0 -3 15 22.67 1.28
 0 3 -15 21.21 1.23
 0 3 15 21.6 1.09
 0 -3 -15 22.63 1.13
 0 3 -15 24.32 1.25
 -1 -3 -15 2.02 0.38
 -1 3 15 2.17 0.37
 -1 3 15 2.43 0.44
 -1 -3 -15 1.9 0.4
 -1 -3 -15 1.9 0.38
 1 -3 15 1.61 0.43
 1 3 -15 2.46 0.49
 1 3 -15 3.29 0.65
 -1 -3 15 1.66 0.38
 -1 3 -15 2.14 0.44
 -1 3 -15 1.78 0.45
 1 -3 -15 3 0.48
 1 3 15 1.71 0.36
 -1 3 -15 2.17 0.53
 -1 -3 15 2.34 0.52
 1 -3 -15 2.31 0.49
 -2 3 15 1.51 0.34
 -2 -3 -15 1.23 0.36
 -2 -3 -15 0.93 0.29
 -2 3 15 0.84 0.32
 -2 -3 -15 0.97 0.3
 2 -3 15 0.87 0.37
 2 3 -15 1.05 0.36
 2 3 -15 0.8 0.45
 -2 3 -15 1.78 0.46
 -2 3 -15 0.91 0.41
 -2 3 -15 1 0.36
 2 -3 -15 0.82 0.39
 2 -3 -15 1.5 0.36
 -2 -3 15 0.76 0.4
 -2 -3 15 0.87 0.33
 -3 -3 -15 5.93 0.7
 -3 3 15 7.27 0.85
 -3 -3 -15 6.78 0.73
 3 3 -15 6.51 0.98
 3 3 -15 7.65 0.97
 3 -3 -15 8.16 0.86
 -3 3 -15 7.78 0.92
 -3 -3 15 5.82 0.76
 -3 3 -15 6.57 0.88
 3 -3 -15 7.53 0.97
 -4 -3 -15 5.54 0.74
 4 3 -15 6.63 1.06
 -4 -3 -15 4.65 0.71
 -4 3 -15 4.66 0.77
 4 -3 -15 5.29 0.92
 -4 3 -15 5.38 0.83
 -5 -3 -15 1.71 0.5
 5 3 -15 0.88 0.56
 -5 3 -15 1.49 0.58
 5 -3 -15 3.97 0.86
 -5 3 -15 1.4 0.53
 0 4 15 5.18 0.57
 0 -4 -15 4.42 0.52
 0 4 -15 4.47 0.68
 0 -4 15 4.75 0.71
 0 -4 -15 4.71 0.56
 0 4 -15 5.6 0.72
 0 4 -15 5.66 0.71
 0 -4 -15 4.53 0.58
 -1 4 15 20.6 1.07
 -1 -4 -15 20.98 1.01
 1 4 -15 21.75 1.36
 -1 4 15 22.24 1.01
 1 -4 15 21.35 1.31
 1 4 -15 21.24 1.23
 -1 -4 -15 22.49 1.1
 -1 -4 -15 21.94 1.03
 -1 4 -15 21.41 1.2
 1 4 15 22.05 1.07
 -1 4 -15 22.17 1.25
 -1 4 -15 19.56 1.28
 1 -4 -15 23.15 1.11
 -1 -4 15 19.37 1.14
 1 -4 -15 22.83 1.21
 -1 -4 15 22.6 1.33
 2 4 -15 6.71 0.92
 2 4 -15 6.84 0.81
 -2 -4 -15 6.96 0.58
 2 -4 15 7.34 0.9
 -2 4 15 7.5 0.6
 -2 -4 -15 7.2 0.61
 -2 -4 -15 8.09 0.67
 -2 4 15 8.27 0.7
 2 -4 -15 9.23 0.96
 -2 4 -15 8.48 0.9
 2 -4 -15 7.13 0.66
 -2 4 -15 6.98 0.87
 -2 4 -15 8.73 0.78
 -2 -4 15 7.97 0.87
 -3 4 15 4.77 0.68
 -3 -4 -15 3.21 0.51
 3 4 -15 4.37 0.81
 -3 -4 -15 4.65 0.62
 3 -4 -15 3.97 0.7
 3 -4 -15 6.09 0.75
 -3 4 -15 4.81 0.75
 -3 -4 15 3.87 0.64
 -3 4 -15 3.33 0.65
 -4 -4 -15 1.18 0.4
 4 4 -15 0.43 0.46
 4 -4 -15 0.51 0.46
 -4 4 -15 0.91 0.47
 -4 4 -15 0.68 0.38
 -5 -4 -15 2.44 0.52
 5 4 -15 3.98 0.88
 5 -4 -15 2.82 0.72
 -5 4 -15 4.02 0.83
 -5 4 -15 3.25 0.74
 0 -5 -15 3.95 0.54
 0 5 -15 4.07 0.62
 0 -5 -15 4.63 0.52
 0 -5 15 3.3 0.61
 0 5 15 4.27 0.49
 0 5 -15 3.86 0.61
 0 -5 -15 3.36 0.44
 0 5 -15 4.38 0.73
 -1 5 15 7.83 0.61
 -1 -5 -15 6.85 0.58
 -1 -5 -15 8.08 0.59
 1 5 -15 6.22 0.85
 1 -5 15 7.02 0.88
 -1 -5 -15 8.04 0.58
 1 5 -15 9.92 0.83
 -1 5 -15 8.71 0.93
 1 -5 -15 6.81 0.59
 1 -5 -15 7.68 0.69
 -1 5 -15 8.98 0.79
 -1 -5 15 8.06 1.01
 -1 -5 15 8.08 0.74
 -1 5 -15 8.61 1
 -2 5 15 41.07 1.56
 -2 5 15 41.23 1.68
 2 5 -15 38.81 1.84
 2 5 -15 36.57 1.95
 -2 -5 -15 39.78 1.51
 -2 -5 -15 40.44 1.6
 -2 -5 -15 38.06 1.52
 -2 5 -15 40.02 1.94
 2 -5 -15 36.13 1.74
 -2 -5 15 39.3 1.79
 -2 5 -15 41.4 1.85
 2 -5 -15 39 1.63
 -2 5 -15 40.06 1.81
 3 5 -15 3.62 0.79
 -3 -5 -15 5.32 0.65
 -3 -5 -15 4.38 0.56
 -3 5 -15 4.71 0.74
 3 -5 -15 5.16 0.77
 -3 5 -15 6.06 0.92
 -3 -5 15 4.07 0.67
 4 5 -15 1.98 0.69
 -4 -5 -15 2.42 0.47
 4 -5 -15 2.8 0.67
 -4 5 -15 2.59 0.62
 -4 5 -15 2.16 0.55
 5 5 -15 0.76 0.56
 -5 -5 -15 0.75 0.37
 -5 5 -15 0.85 0.45
 -5 5 -15 0.81 0.5
 0 6 -15 4.92 0.67
 0 6 -15 5.62 0.76
 0 6 15 5.39 0.46
 0 -6 -15 5.5 0.48
 0 -6 -15 4.23 0.53
 0 6 -15 3.67 0.66
 0 -6 -15 4.34 0.48
 1 6 -15 11.13 1.05
 -1 -6 -15 13.08 0.76
 -1 -6 -15 13.66 0.72
 1 6 -15 12.57 0.97
 -1 6 15 13.09 0.77
 -1 -6 -15 13.44 0.73
 1 -6 -15 14.71 0.91
 1 -6 -15 12.38 0.76
 -1 6 -15 11.84 1.01
 -1 -6 15 12.91 0.93
 -1 6 -15 14.95 1.02
 -1 6 -15 12.35 0.98
 -2 -6 -15 9.69 0.67
 -2 -6 -15 9.63 0.62
 -2 6 15 9.74 0.65
 2 6 -15 8.9 1.08
 -2 6 15 9.34 0.72
 2 6 -15 10.19 0.91
 -2 -6 -15 8.91 0.63
 -2 6 -15 9.4 0.85
 -2 6 -15 7.43 0.94
 -2 6 -15 10.2 0.9
 -2 -6 15 10.28 0.85
 2 -6 -15 9.03 0.8
 2 -6 -15 10 0.74
 3 6 -15 5.96 0.96
 -3 -6 -15 5.4 0.61
 -3 -6 15 4.39 0.69
 -3 6 -15 5.25 0.83
 -3 6 -15 6.55 0.91
 3 -6 -15 5.56 0.8
 4 6 -15 1.83 0.61
 -4 -6 -15 2.18 0.47
 -4 6 -15 2.22 0.62
 -4 6 -15 1.69 0.54
 -5 -6 -15 6.59 0.82
 5 6 -15 4.68 1.03
 -5 6 -15 6.15 0.95
 -5 6 -15 5.87 1.01
 0 7 -15 0.39 0.32
 0 7 -15 0.48 0.37
 0 7 15 0.8 0.23
 0 7 -15 1 0.38
 0 -7 -15 1.21 0.27
 0 -7 -15 0.69 0.24
 0 -7 -15 0.75 0.28
 -1 -7 -15 0.12 0.17
 1 7 -15 -0.14 0.29
 1 7 -15 0.52 0.35
 -1 -7 -15 0.41 0.19
 -1 -7 -15 0.16 0.21
 -1 7 15 0.14 0.17
 -1 7 -15 0.24 0.27
 1 -7 -15 -0.01 0.23
 1 -7 -15 0.2 0.19
 -1 7 -15 0.65 0.41
 -1 7 -15 -0.07 0.26
 2 7 -15 1.37 0.44
 2 7 -15 0.51 0.43
 -2 -7 -15 1.06 0.26
 -2 -7 -15 0.86 0.25
 -2 7 15 0.99 0.26
 -2 7 -15 0.85 0.43
 -2 7 -15 1.86 0.5
 -2 -7 15 0.48 0.32
 2 -7 -15 0.52 0.27
 -2 7 -15 1.24 0.45
 2 -7 -15 0.7 0.33
 3 7 -15 0.41 0.46
 -3 -7 -15 1.31 0.31
 -3 7 -15 1.96 0.56
 -3 -7 15 1.67 0.49
 -3 7 -15 2.13 0.55
 4 7 -15 6.02 1.01
 -4 -7 -15 7.43 0.68
 -4 7 -15 7.58 1.04
 -4 7 -15 8.05 1.06
 -5 -7 -15 6.21 0.77
 5 7 -15 6.54 1.17
 -5 7 -15 8.67 1.07
 -5 7 -15 5.17 0.91
 0 8 -15 0.11 0.3
 0 -8 -15 -0.1 0.17
 0 8 -15 0.48 0.34
 0 8 15 -0.01 0.13
 0 8 -15 0.2 0.32
 0 -8 -15 0.21 0.16
 0 -8 -15 -0.01 0.13
 1 8 -15 7.65 0.88
 1 8 -15 7.7 1.07
 -1 -8 -15 7.91 0.5
 -1 -8 -15 7.28 0.49
 -1 8 -15 6.18 0.79
 1 -8 -15 7.72 0.56
 -1 8 -15 8.62 1.07
 -1 8 -15 7.44 0.88
 2 8 -15 9.81 0.91
 2 8 -15 10.28 1.22
 -2 -8 -15 9.18 0.56
 -2 8 15 9.77 0.61
 -2 -8 -15 9.31 0.58
 2 -8 -15 9.26 0.7
 -2 8 -15 9.12 1.01
 -2 -8 15 9.31 0.85
 -2 8 -15 10.13 1.17
 -3 -8 -15 0.21 0.2
 3 8 -15 -0.11 0.36
 -3 -8 15 0.11 0.29
 -3 8 -15 0.75 0.47
 -3 8 -15 -0.32 0.27
 4 8 -15 2.94 0.82
 -4 -8 -15 3.55 0.52
 -4 8 -15 3.07 0.68
 -4 8 -15 2.94 0.73
 0 9 -15 5.19 0.78
 0 -9 -15 3.9 0.36
 0 -9 -15 4.17 0.36
 0 9 -15 5.16 0.79
 0 9 -15 4.28 0.8
 1 9 -15 0.17 0.31
 1 9 -15 0.32 0.39
 -1 -9 -15 0.12 0.14
 -1 -9 -15 0.04 0.14
 1 -9 -15 0.25 0.18
 -1 9 -15 0.09 0.39
 -1 9 -15 0.22 0.31
 -1 9 -15 0.02 0.29
 -2 -9 -15 5.17 0.41
 2 9 -15 5.3 0.87
 -2 9 15 5.67 0.46
 -2 -9 -15 7.02 0.52
 -2 -9 -15 5.81 0.44
 -2 9 -15 5.46 0.8
 -2 -9 15 5.92 0.82
 -2 9 -15 5.18 0.86
 2 -9 -15 5.12 0.57
 -3 -9 -15 10.51 0.67
 3 9 -15 8.36 1.18
 -3 9 -15 10.17 1.12
 -3 9 -15 10.38 1.26
 -3 -9 15 12.21 1.01
 -4 -9 -15 -0.16 0.18
 4 9 -15 -0.25 0.41
 -4 9 -15 0.41 0.44
 -4 9 -15 -0.18 0.31
 0 10 -15 7.84 0.96
 0 10 -15 6.94 0.96
 0 10 -15 7.76 0.91
 0 -10 -15 7.34 0.43
 0 -10 -15 8.31 0.44
 1 10 -15 3.59 0.74
 1 10 -15 3.6 0.71
 -1 -10 -15 3.3 0.26
 -1 -10 -15 2.75 0.25
 1 10 -15 2.88 0.71
 -1 10 -15 2.89 0.72
 1 -10 -15 3.12 0.38
 -1 10 -15 2.14 0.55
 -2 -10 -15 3.29 0.34
 2 10 -15 3.42 0.79
 -2 -10 -15 3.87 0.32
 -2 10 -15 4.37 0.74
 -2 10 -15 2.62 0.72
 -2 -10 15 2.92 0.6
 2 -10 -15 3.51 0.46
 3 10 -15 7.18 1.11
 -3 -10 -15 7.68 0.54
 -3 -10 15 6.77 0.9
 -3 10 -15 7.38 1.01
 -3 10 -15 6.77 1.05
 -4 -10 -15 0.27 0.22
 4 10 -15 0.75 0.51
 -4 10 -15 0.21 0.37
 -4 10 -15 0.65 0.4
 0 11 -15 2 0.61
 0 11 -15 1.85 0.49
 0 -11 -15 1.79 0.19
 0 -11 -15 1.92 0.2
 1 11 -15 8.18 1.17
 1 11 -15 8.47 1.07
 1 -11 -15 6.85 0.46
 -1 11 -15 5.81 0.91
 -1 11 -15 9.44 1.06
 -2 -11 -15 7.22 0.36
 2 11 -15 6.98 1.06
 -2 -11 -15 7.05 0.37
 -2 11 -15 7.88 0.96
 -2 -11 15 7.53 0.96
 2 -11 -15 7.85 0.58
 -2 11 -15 9.58 1.24
 -3 -11 -15 0.47 0.2
 3 11 -15 1.02 0.58
 -3 -11 -15 0.66 0.18
 -3 11 -15 1.58 0.6
 -3 11 -15 0.55 0.39
 -3 -11 15 1.24 0.49
 0 12 -15 -0.34 0.23
 0 12 -15 -0.36 0.24
 1 12 -15 1.53 0.56
 -1 12 -15 1.67 0.63
 1 -12 -15 0.92 0.19
 -1 12 -15 0.72 0.41
 2 12 -15 1.53 0.6
 -2 -12 15 1.28 0.44
 2 -12 -15 2.44 0.37
 -2 12 -15 3.44 0.79
 3 12 -15 1.81 0.68
 -3 -12 -15 0.92 0.16
 -3 -12 -15 0.55 0.17
 -3 12 -15 1.04 0.5
 -3 -12 15 0.99 0.47
 0 13 -15 15.12 1.3
 1 13 -15 2.71 0.78
 1 -13 -15 2.96 0.24
 -1 13 -15 2.6 0.69
 2 13 -15 0.48 0.47
 -2 13 -15 0.17 0.43
 2 -13 -15 0.31 0.19
 -2 -13 15 0.04 0.32
 0 14 -15 4.28 0.88
 1 14 -15 2.14 0.69
 -1 14 -15 2.18 0.65
 -2 14 -15 1.54 0.61
 0 0 -16 2.32 0.42
 0 0 -16 3.41 0.54
 -1 0 16 11.16 0.79
 1 0 -16 12.09 0.88
 -1 0 -16 12.64 0.88
 1 0 -16 12.84 1
 -1 0 -16 14.12 0.9
 -1 0 -16 14.12 1
 1 0 16 12.7 0.92
 -1 0 16 12.9 0.93
 -2 0 -16 -0.03 0.22
 -2 0 -16 0.48 0.33
 -2 0 -16 0.37 0.3
 2 0 -16 0.2 0.33
 2 0 -16 0.13 0.26
 -2 0 16 0.25 0.23
 -2 0 16 0.42 0.32
 -3 0 -16 1.81 0.45
 3 0 -16 1.47 0.52
 -3 0 16 2.93 0.6
 -3 0 -16 2.19 0.53
 4 0 -16 8.93 1.16
 -4 0 -16 8.48 0.99
 -4 0 -16 8.23 0.93
 -5 0 -16 2.5 0.6
 5 0 -16 4.26 0.92
 0 -1 -16 -0.08 0.26
 0 1 -16 -0.12 0.2
 0 -1 16 0.14 0.26
 0 -1 -16 0.06 0.21
 0 -1 -16 0.22 0.24
 0 1 -16 -0.07 0.26
 0 1 16 0.16 0.2
 0 1 -16 -0.25 0.18
 -1 -1 -16 2.76 0.51
 -1 -1 -16 3.36 0.54
 -1 -1 -16 2.66 0.46
 1 -1 16 2.14 0.5
 -1 1 16 2.68 0.5
 1 1 -16 2.93 0.53
 1 1 -16 2.14 0.52
 -1 1 16 2.23 0.41
 1 -1 -16 2.4 0.46
 -1 1 -16 3.72 0.55
 -1 -1 16 2.76 0.52
 -1 1 -16 2.18 0.51
 1 -1 -16 3.14 0.59
 -1 1 -16 2.69 0.5
 1 1 16 1.94 0.43
 -1 -1 16 2.5 0.43
 -2 1 16 2.07 0.42
 -2 1 16 1.72 0.45
 -2 -1 -16 1.53 0.41
 2 1 -16 1.94 0.45
 -2 -1 -16 2.09 0.49
 2 1 -16 1.12 0.45
 -2 -1 -16 1.15 0.35
 -2 -1 16 1.35 0.42
 2 -1 -16 1.47 0.4
 -2 -1 16 1.08 0.32
 -2 1 -16 1.87 0.45
 -2 1 -16 1.51 0.42
 2 -1 -16 1.07 0.47
 -2 1 -16 1.71 0.4
 -3 -1 -16 3.3 0.6
 -3 -1 -16 4.07 0.6
 3 1 -16 4.89 0.85
 -3 1 16 2.93 0.59
 -3 1 -16 3.72 0.67
 3 -1 -16 4.23 0.79
 -3 1 -16 2.69 0.56
 -3 -1 16 4.21 0.75
 4 1 -16 -0.22 0.39
 -4 -1 -16 0.45 0.36
 -4 -1 -16 0.69 0.36
 -4 1 -16 -0.09 0.3
 -4 1 -16 0.33 0.35
 4 -1 -16 0.13 0.42
 -5 -1 -16 1.95 0.56
 5 1 -16 1.5 0.62
 5 -1 -16 2.02 0.7
 -5 1 -16 2.28 0.58
 -5 1 -16 1.37 0.52
 0 -2 -16 9.73 0.77
 0 -2 16 10.81 0.89
 0 2 -16 10.79 0.86
 0 2 16 11.7 0.81
 0 -2 -16 9.18 0.81
 0 2 -16 10.45 0.83
 0 -2 -16 10.73 0.76
 0 2 -16 11.78 0.94
 1 -2 16 3.13 0.59
 -1 -2 -16 3.34 0.5
 -1 2 16 3.11 0.51
 1 2 -16 3.3 0.6
 -1 -2 -16 2.63 0.49
 1 2 -16 2.55 0.49
 -1 -2 -16 3.1 0.48
 1 -2 -16 2.08 0.45
 -1 2 -16 2.22 0.54
 1 -2 -16 3.31 0.6
 1 2 16 3.03 0.51
 -1 -2 16 3.05 0.58
 -1 2 -16 2.75 0.5
 -1 -2 16 1.92 0.41
 -1 2 -16 2.85 0.56
 2 2 -16 1.88 0.57
 -2 2 16 1.59 0.37
 -2 -2 -16 1.48 0.39
 -2 -2 -16 1.21 0.4
 -2 2 16 0.87 0.37
 -2 -2 -16 0.75 0.3
 2 2 -16 1.12 0.41
 -2 2 -16 1 0.41
 2 -2 -16 1.75 0.52
 -2 2 -16 1.15 0.39
 -2 2 -16 0.96 0.35
 2 -2 -16 1.39 0.38
 -2 -2 16 0.86 0.32
 -2 -2 16 1.12 0.44
 -3 -2 -16 2.43 0.5
 -3 -2 -16 3.17 0.59
 -3 2 16 2 0.5
 3 2 -16 1.8 0.57
 -3 2 -16 1.89 0.52
 3 -2 -16 2.72 0.66
 -3 2 -16 1.83 0.51
 4 2 -16 0.92 0.49
 -4 -2 -16 0.4 0.34
 4 -2 -16 0.8 0.5
 -4 2 -16 0.07 0.37
 -4 2 -16 0.25 0.33
 5 2 -16 3.37 0.84
 -5 -2 -16 3.31 0.66
 -5 2 -16 1.65 0.55
 5 -2 -16 2.32 0.67
 -5 2 -16 1.37 0.56
 0 3 16 5.25 0.63
 0 -3 16 5.46 0.76
 0 3 -16 4.44 0.7
 0 -3 -16 5.76 0.61
 0 -3 -16 4.33 0.56
 0 -3 -16 5.88 0.71
 0 3 -16 4.88 0.67
 0 3 -16 4.07 0.6
 1 3 -16 2.5 0.61
 -1 -3 -16 3.42 0.53
 -1 3 16 2.87 0.48
 1 3 -16 3.25 0.56
 -1 -3 -16 3.77 0.51
 -1 -3 -16 3.1 0.48
 1 -3 16 3.34 0.6
 1 3 16 4.18 0.56
 -1 -3 16 3.4 0.62
 1 -3 -16 3.49 0.51
 -1 -3 16 4.65 0.64
 1 -3 -16 3.69 0.59
 -1 3 -16 4.08 0.61
 -1 3 -16 2.64 0.6
 -1 3 -16 3.1 0.59
 -2 3 16 3.08 0.47
 -2 -3 -16 2.69 0.45
 2 -3 16 2.1 0.44
 2 3 -16 2.13 0.47
 2 3 -16 2.72 0.68
 -2 3 16 2.6 0.51
 -2 -3 -16 1.58 0.39
 -2 -3 -16 2.64 0.51
 2 -3 -16 2.76 0.57
 -2 3 -16 3.1 0.63
 -2 -3 16 3.42 0.66
 -2 3 -16 2.59 0.5
 -2 3 -16 3.5 0.59
 -2 -3 16 2.44 0.48
 2 -3 -16 3.06 0.54
 -3 -3 -16 6.03 0.69
 3 3 -16 4.65 0.83
 -3 -3 -16 6.32 0.76
 -3 3 -16 4.94 0.77
 3 -3 -16 5.83 0.86
 -3 3 -16 6.7 0.88
 -4 -3 -16 4.66 0.68
 4 3 -16 6.3 0.97
 4 -3 -16 3.73 0.8
 -4 3 -16 5.81 0.84
 -4 3 -16 3.77 0.69
 -5 -3 -16 2.02 0.55
 5 3 -16 2.77 0.8
 5 -3 -16 2.73 0.73
 -5 3 -16 2.03 0.63
 -5 3 -16 2.17 0.62
 0 -4 -16 1.37 0.32
 0 4 -16 1.42 0.48
 0 4 16 1.42 0.34
 0 -4 -16 1.12 0.29
 0 -4 16 1.3 0.45
 0 -4 -16 0.88 0.34
 0 4 -16 1.08 0.38
 0 4 -16 1.13 0.39
 -1 -4 -16 3.55 0.47
 -1 4 16 3.69 0.51
 1 4 -16 3.55 0.61
 1 -4 16 2.94 0.64
 1 4 -16 2.24 0.59
 -1 -4 -16 2.97 0.44
 -1 -4 -16 2.91 0.48
 1 4 16 2.88 0.47
 -1 -4 16 3.66 0.67
 1 -4 -16 3.08 0.55
 1 -4 -16 3.02 0.48
 -1 4 -16 3.15 0.59
 -1 4 -16 3.54 0.61
 -1 4 -16 2.7 0.55
 -2 4 16 2.95 0.46
 -2 4 16 4.84 0.65
 -2 -4 -16 4.33 0.52
 -2 -4 -16 3.51 0.5
 2 4 -16 3.86 0.74
 2 -4 16 5.1 0.76
 -2 -4 -16 3.81 0.56
 2 -4 -16 3.13 0.59
 -2 4 -16 4.33 0.74
 -2 4 -16 4.7 0.75
 -2 -4 16 4.52 0.69
 2 -4 -16 3.08 0.51
 -3 -4 -16 3.57 0.55
 3 4 -16 3.35 0.78
 -3 4 -16 3.45 0.64
 3 -4 -16 3.52 0.67
 -3 4 -16 2.56 0.6
 -4 -4 -16 1.74 0.47
 4 4 -16 1.07 0.49
 -4 4 -16 1.69 0.51
 -4 4 -16 1.01 0.49
 4 -4 -16 2.15 0.59
 5 4 -16 0.68 0.52
 -5 -4 -16 0.54 0.36
 -5 4 -16 1.04 0.51
 -5 4 -16 0.4 0.42
 0 5 -16 0.59 0.36
 0 -5 -16 0.55 0.24
 0 5 -16 -0.21 0.24
 0 5 16 0.04 0.19
 0 -5 -16 0.16 0.2
 0 5 -16 0.15 0.3
 0 -5 -16 -0.19 0.2
 -1 -5 -16 0.32 0.25
 -1 -5 -16 0.2 0.21
 1 5 -16 0.39 0.31
 -1 5 16 0.34 0.24
 -1 -5 -16 0.62 0.24
 1 5 -16 -0.03 0.31
 -1 5 -16 0.58 0.34
 -1 5 -16 -0.25 0.24
 1 -5 -16 0.4 0.29
 -1 5 -16 0.39 0.33
 1 -5 -16 0.19 0.2
 -2 5 16 5.1 0.58
 -2 -5 -16 4.6 0.59
 -2 -5 -16 4.31 0.51
 -2 -5 -16 4.82 0.55
 2 5 -16 4.54 0.79
 2 -5 -16 4.74 0.71
 2 -5 -16 3.77 0.52
 -2 -5 16 3.47 0.59
 -2 5 -16 4.59 0.76
 -2 5 -16 5.34 0.75
 -3 -5 -16 2.06 0.43
 3 5 -16 2.89 0.68
 -3 5 -16 3.7 0.72
 -3 5 -16 2.77 0.65
 3 -5 -16 2.69 0.6
 -4 -5 -16 0.08 0.27
 4 5 -16 0.67 0.51
 -4 5 -16 0.61 0.4
 -4 5 -16 1.09 0.46
 5 5 -16 3 0.89
 -5 -5 -16 1.85 0.48
 -5 5 -16 1.09 0.55
 -5 5 -16 2.08 0.68
 0 6 -16 1.1 0.36
 0 6 16 1.35 0.31
 0 -6 -16 0.8 0.32
 0 -6 -16 1.03 0.29
 0 -6 -16 1.64 0.34
 0 6 -16 0.92 0.41
 0 6 -16 0.8 0.43
 -1 -6 -16 2.57 0.38
 -1 -6 -16 2.03 0.36
 -1 -6 -16 1.92 0.39
 1 6 -16 1.96 0.55
 1 6 -16 2.3 0.53
 -1 6 -16 2 0.53
 -1 6 -16 2.46 0.54
 1 -6 -16 2.16 0.44
 1 -6 -16 1.7 0.35
 -1 6 -16 2.32 0.59
 -2 -6 -16 2.32 0.4
 2 6 -16 2.41 0.65
 -2 -6 -16 2.06 0.37
 -2 6 -16 0.28 0.39
 2 -6 -16 2.71 0.54
 2 -6 -16 2.5 0.45
 -2 -6 16 1.31 0.4
 -2 6 -16 1.63 0.5
 3 6 -16 5.11 0.9
 -3 -6 -16 7.71 0.66
 -3 6 -16 7.34 1.04
 -3 6 -16 8.63 1
 -4 -6 -16 0.88 0.36
 4 6 -16 0.89 0.57
 -4 6 -16 1.6 0.58
 -4 6 -16 0.2 0.37
 0 7 -16 8.8 0.98
 0 7 -16 8.31 1
 0 7 -16 8.71 0.95
 0 -7 -16 8.27 0.59
 0 -7 -16 8.05 0.58
 1 7 -16 0.52 0.4
 -1 -7 -16 0.08 0.17
 -1 -7 -16 0.16 0.18
 1 -7 -16 0.11 0.19
 -1 7 -16 0.45 0.35
 -1 7 -16 0.62 0.4
 2 7 -16 0.34 0.39
 -2 -7 -16 -0.14 0.17
 -2 -7 -16 0.18 0.19
 2 -7 -16 0.42 0.25
 -2 7 -16 -0.18 0.3
 -2 -7 16 0.29 0.27
 -2 7 -16 0.08 0.33
 3 7 -16 10.19 1.29
 -3 -7 -16 9.57 0.71
 -3 7 -16 11.07 1.03
 -3 7 -16 8.72 1.09
 -4 -7 -16 6.39 0.71
 4 7 -16 6.04 1.07
 -4 7 -16 6.55 1.06
 -4 7 -16 5.65 0.88
 0 8 -16 3.06 0.6
 -1 -8 -16 6.68 0.5
 -1 -8 -16 7.06 0.51
 1 8 -16 6.52 0.98
 -1 8 -16 7.14 0.93
 1 -8 -16 7.12 0.57
 -1 8 -16 5.79 0.9
 2 8 -16 9.86 1.23
 -2 -8 -16 9.81 0.63
 -2 -8 -16 10.04 0.62
 -2 -8 16 9.52 0.89
 -2 8 -16 9.7 1.15
 -2 8 -16 11.22 1
 2 -8 -16 10.63 0.75
 -3 -8 -16 0.82 0.29
 3 8 -16 0.49 0.43
 -3 8 -16 0.45 0.44
 -3 8 -16 1.6 0.53
 -4 -8 -16 2.29 0.43
 4 8 -16 1.54 0.58
 -4 8 -16 2.28 0.74
 -4 8 -16 1.87 0.62
 0 9 -16 5.03 0.9
 0 -9 -16 4.95 0.42
 0 -9 -16 4.96 0.42
 0 9 -16 5.62 0.83
 -1 -9 -16 7.42 0.48
 1 9 -16 8.87 1.13
 -1 -9 -16 8.24 0.49
 1 9 -16 6.76 1.02
 1 -9 -16 7.86 0.57
 -1 9 -16 6.2 0.85
 -1 9 -16 8.41 1.1
 -2 -9 -16 9.27 0.58
 2 9 -16 9.53 1.25
 -2 -9 -16 9.81 0.57
 2 -9 -16 11.08 0.75
 -2 9 -16 10.85 1.02
 -2 9 -16 10.41 1.26
 -2 -9 16 10.58 0.95
 -3 -9 -16 2.14 0.37
 -3 -9 -16 2.37 0.35
 3 9 -16 2.28 0.69
 -3 9 -16 1.94 0.6
 -3 9 -16 1.63 0.63
 -4 -9 -16 2.97 0.48
 4 9 -16 2.56 0.84
 -4 9 -16 2.78 0.72
 -4 9 -16 2.74 0.77
 0 -10 -16 4.56 0.37
 0 -10 -16 4.83 0.37
 0 10 -16 5.83 0.86
 0 10 -16 5.16 0.86
 -1 -10 -16 3.99 0.33
 1 10 -16 4.17 0.85
 -1 -10 -16 5.01 0.34
 1 10 -16 5.62 0.84
 1 -10 -16 4.98 0.45
 -1 10 -16 4.57 0.76
 -1 10 -16 4.42 0.86
 -2 -10 -16 0.31 0.16
 -2 -10 -16 -0.2 0.13
 2 10 -16 0.28 0.43
 -2 -10 16 0.2 0.33
 -2 10 -16 0.64 0.4
 -2 10 -16 0.2 0.35
 2 -10 -16 0.44 0.24
 -3 -10 -16 0.26 0.2
 3 10 -16 -0.06 0.47
 -3 -10 -16 0.37 0.21
 -3 10 -16 0.22 0.39
 -3 10 -16 0.26 0.38
 0 -11 -16 0.87 0.16
 0 -11 -16 0.74 0.16
 0 11 -16 -0.05 0.35
 0 11 -16 0.41 0.35
 1 11 -16 3.85 0.85
 1 11 -16 2.7 0.62
 -1 11 -16 3.66 0.7
 -1 11 -16 4.07 0.86
 1 -11 -16 3.11 0.36
 2 11 -16 1.04 0.53
 -2 -11 -16 2.46 0.25
 -2 -11 -16 2.54 0.26
 2 -11 -16 2.88 0.42
 -2 11 -16 2.54 0.62
 -2 11 -16 2.77 0.74
 -2 -11 16 1.33 0.47
 -3 -11 -16 0.26 0.19
 -3 -11 -16 0.87 0.23
 3 11 -16 2.53 0.8
 -3 11 -16 0.82 0.46
 0 12 -16 -0.16 0.34
 1 12 -16 0.69 0.48
 1 -12 -16 0.9 0.19
 -1 12 -16 0.57 0.44
 2 12 -16 0.32 0.43
 -2 -12 16 0.83 0.48
 -2 12 -16 0.65 0.52
 2 -12 -16 0.65 0.25
 0 13 -16 1.3 0.57
 1 13 -16 6.17 1.07
 1 -13 -16 4.06 0.29
 1 -13 -16 4.26 0.29
 -1 13 -16 3.58 0.83
 -2 13 -16 1.68 0.62
 0 0 -17 2.19 0.45
 0 0 -17 2.22 0.49
 0 0 -17 1.21 0.38
 1 0 -17 0.27 0.29
 -1 0 -17 0.32 0.29
 -1 0 17 0.14 0.25
 -1 0 -17 0.19 0.29
 1 0 17 0.49 0.27
 -1 0 -17 -0.03 0.24
 1 0 -17 0.42 0.36
 -2 0 -17 0.74 0.35
 -2 0 -17 0.28 0.34
 2 0 -17 0.67 0.41
 -2 0 17 0.13 0.3
 3 0 -17 5.1 0.85
 -3 0 -17 6.29 0.83
 -3 0 17 6.64 0.87
 -3 0 -17 7.53 0.87
 -4 0 -17 0.85 0.4
 -4 0 -17 0.51 0.41
 4 0 -17 0.25 0.47
 5 0 -17 4.26 0.93
 -5 0 -17 4 0.74
 0 -1 -17 4.19 0.61
 0 -1 -17 5.67 0.67
 0 1 -17 5.6 0.7
 0 1 17 5.18 0.68
 0 1 -17 4.85 0.66
 0 -1 17 5.73 0.76
 0 -1 -17 5.05 0.71
 0 1 -17 4.75 0.72
 1 -1 17 4.98 0.72
 1 1 -17 5.47 0.72
 -1 -1 -17 4.9 0.61
 1 1 -17 3.71 0.66
 -1 -1 -17 5.16 0.66
 -1 -1 -17 4.54 0.63
 -1 1 17 6 0.73
 -1 1 -17 5.23 0.69
 1 -1 -17 4.39 0.71
 1 1 17 5.19 0.69
 -1 1 -17 3.97 0.65
 -1 -1 17 7.24 0.86
 -1 1 -17 4.48 0.62
 1 -1 -17 4.07 0.59
 2 1 -17 1.62 0.54
 -2 -1 -17 1.35 0.43
 -2 -1 -17 1.14 0.39
 -2 1 17 1.29 0.42
 -2 -1 17 1.65 0.48
 2 -1 -17 0.36 0.37
 -2 1 -17 1.3 0.41
 -2 1 -17 1.09 0.44
 -3 -1 -17 5.59 0.74
 -3 -1 -17 4.8 0.72
 3 1 -17 6.11 0.97
 3 -1 -17 5.68 0.92
 -3 1 -17 4.66 0.73
 -3 -1 17 4.15 0.84
 -3 1 -17 6.2 0.8
 -4 -1 -17 3.75 0.68
 4 1 -17 2.42 0.74
 -4 1 -17 2.19 0.58
 4 -1 -17 3.69 0.85
 -4 1 -17 3.05 0.66
 -5 -1 -17 0.63 0.43
 5 1 -17 1.64 0.62
 5 -1 -17 0.55 0.54
 -5 1 -17 1.6 0.56
 0 2 -17 -0.19 0.25
 0 -2 -17 0.13 0.23
 0 -2 -17 -0.1 0.21
 0 2 -17 0.31 0.26
 0 -2 17 0 0.23
 0 2 -17 -0.14 0.21
 0 2 17 -0.17 0.18
 0 -2 -17 -0.03 0.28
 1 -2 17 9.74 0.9
 -1 2 17 9.67 0.79
 -1 -2 -17 10.39 0.86
 -1 -2 -17 9.37 0.76
 1 2 -17 10.4 0.98
 -1 -2 -17 10.01 0.78
 1 2 17 11.73 0.84
 1 -2 -17 8.71 0.76
 1 -2 -17 10.01 0.88
 -1 -2 17 10.16 0.88
 -1 2 -17 8.13 0.94
 -1 2 -17 10.01 0.86
 -2 -2 -17 8.43 0.8
 2 2 -17 5.53 0.87
 -2 2 17 9.65 0.85
 -2 -2 -17 8.32 0.73
 -2 -2 -17 7.36 0.79
 2 -2 -17 8.28 0.96
 -2 2 -17 8.6 0.99
 -2 -2 17 9.17 1.04
 -2 2 -17 9.12 0.86
 -3 -2 -17 0.87 0.37
 -3 -2 -17 1.85 0.49
 3 2 -17 1.48 0.56
 3 -2 -17 1.26 0.56
 -3 2 -17 1.89 0.54
 -3 2 -17 1.82 0.52
 4 2 -17 8.37 1.14
 -4 -2 -17 11.48 0.96
 -4 2 -17 6.92 0.97
 4 -2 -17 8.78 1.14
 -4 2 -17 8.11 0.97
 -5 2 -17 0.67 0.43
 0 3 17 3.32 0.53
 0 -3 -17 2.78 0.47
 0 -3 -17 2.54 0.48
 0 3 -17 4.06 0.64
 0 3 -17 2.56 0.62
 0 -3 17 3.38 0.6
 0 -3 -17 3.51 0.58
 -1 3 17 7.78 0.71
 1 3 -17 6.37 0.88
 -1 -3 -17 8.04 0.67
 -1 -3 -17 7.87 0.68
 -1 -3 -17 8.57 0.75
 1 -3 17 8.08 0.96
 -1 -3 17 8.33 0.95
 1 -3 -17 8.43 0.96
 -1 3 -17 8.78 0.95
 -1 3 -17 7.2 0.9
 1 -3 -17 7.65 0.7
 2 3 -17 5.83 0.9
 -2 -3 -17 5.91 0.65
 -2 -3 -17 7 0.79
 2 -3 17 5.99 0.84
 -2 -3 -17 6.5 0.73
 -2 3 -17 5.39 0.74
 -2 3 -17 5.24 0.83
 2 -3 -17 6.4 0.88
 3 3 -17 10.22 1.22
 -3 -3 -17 11.34 0.88
 3 -3 -17 11.53 1.07
 -3 3 -17 10.54 0.97
 -3 3 -17 9.83 1.11
 -4 -3 -17 10.27 0.9
 4 3 -17 10.58 1.29
 -4 3 -17 12.52 1.13
 -4 3 -17 9.43 1.05
 4 -3 -17 8.23 1.13
 0 -4 -17 3.67 0.52
 0 -4 -17 2.91 0.47
 0 -4 -17 3.33 0.56
 0 -4 17 3.16 0.63
 0 4 -17 2.89 0.62
 0 4 -17 3.15 0.58
 -1 -4 -17 4.19 0.58
 1 -4 17 4.04 0.73
 1 4 -17 3.94 0.73
 -1 -4 -17 4.07 0.53
 -1 -4 -17 4.08 0.55
 1 -4 -17 5.12 0.72
 -1 4 -17 5.25 0.83
 1 -4 -17 4.43 0.56
 -1 4 -17 4.14 0.69
 2 4 -17 3.98 0.75
 -2 -4 -17 4.21 0.56
 -2 -4 -17 4.5 0.57
 2 -4 -17 4.8 0.72
 -2 4 -17 5.08 0.83
 -2 4 -17 4.53 0.75
 3 4 -17 3.55 0.81
 -3 -4 -17 3.66 0.58
 3 -4 -17 3.18 0.74
 -3 4 -17 4.04 0.73
 -3 4 -17 3.67 0.73
 -4 -4 -17 0.96 0.4
 4 4 -17 0.58 0.54
 -4 4 -17 3.18 0.69
 -4 4 -17 2.24 0.65
 0 -5 -17 0.29 0.24
 0 5 -17 -0.27 0.24
 0 -5 -17 0.05 0.2
 0 -5 -17 0.34 0.32
 0 5 -17 0.4 0.4
 -1 -5 -17 5.3 0.58
 -1 -5 -17 5.3 0.57
 1 5 -17 3.66 0.76
 1 -5 -17 4.68 0.58
 1 -5 -17 5.55 0.77
 -1 5 -17 4.96 0.81
 -1 5 -17 5.14 0.75
 -2 -5 -17 2.99 0.44
 -2 -5 -17 1.55 0.37
 2 5 -17 1.74 0.59
 -2 5 -17 1.45 0.51
 -2 5 -17 2.09 0.57
 3 5 -17 0.25 0.39
 -3 -5 -17 0.03 0.24
 -3 5 -17 -0.08 0.31
 -3 5 -17 0.18 0.36
 4 5 -17 0.61 0.48
 -4 -5 -17 0.74 0.35
 -4 5 -17 0.29 0.35
 -4 5 -17 0.32 0.4
 0 6 -17 2.4 0.64
 0 6 -17 2.51 0.55
 0 -6 -17 4.12 0.52
 0 -6 -17 3.53 0.47
 -1 -6 -17 0.59 0.26
 1 6 -17 1.67 0.57
 -1 -6 -17 1.09 0.31
 -1 6 -17 -0.02 0.29
 1 -6 -17 0.79 0.29
 -1 6 -17 0.34 0.38
 -2 -6 -17 1.68 0.35
 2 6 -17 1.38 0.52
 -2 -6 -17 2.15 0.4
 -2 6 -17 2.24 0.64
 -2 6 -17 2.21 0.57
 -3 -6 -17 0.4 0.25
 3 6 -17 0.1 0.38
 -3 6 -17 1.14 0.45
 -3 6 -17 1.07 0.44
 -4 -6 -17 3.6 0.57
 4 6 -17 1.5 0.66
 -4 6 -17 3.93 0.78
 -4 6 -17 5.15 0.93
 0 -7 -17 0.27 0.21
 0 7 -17 0.88 0.4
 0 -7 -17 0.22 0.22
 0 7 -17 0.87 0.42
 1 7 -17 11.13 1.29
 -1 -7 -17 9.31 0.64
 -1 -7 -17 9.01 0.63
 -1 7 -17 7.51 1.04
 -1 7 -17 10.81 0.98
 1 -7 -17 9.45 0.69
 2 7 -17 0.5 0.41
 -2 -7 -17 0.78 0.26
 -2 -7 -17 0.78 0.27
 -2 7 -17 1.61 0.57
 -2 7 -17 1.53 0.53
 3 7 -17 0.2 0.44
 -3 -7 -17 -0.04 0.21
 -3 7 -17 -0.01 0.33
 -3 7 -17 -0.12 0.3
 -4 -7 -17 13 0.9
 4 7 -17 9.97 1.35
 -4 7 -17 11.45 1.34
 -4 7 -17 10.87 1.25
 0 -8 -17 0.92 0.27
 0 -8 -17 1.25 0.29
 0 8 -17 0.82 0.49
 0 8 -17 0.89 0.41
 -1 -8 -17 0.14 0.19
 1 8 -17 0.22 0.38
 1 8 -17 0.39 0.38
 -1 -8 -17 -0.05 0.16
 1 -8 -17 0.52 0.25
 -1 8 -17 -0.29 0.32
 -1 8 -17 0.5 0.37
 2 8 -17 3.39 0.79
 -2 -8 -17 5.56 0.49
 -2 -8 -17 5.61 0.5
 -2 8 -17 6 0.99
 -2 8 -17 5.46 0.83
 3 8 -17 17.22 1.45
 -3 -8 -17 16.33 0.92
 -3 8 -17 16.49 1.39
 -3 8 -17 16.89 1.3
 0 -9 -17 6.55 0.5
 0 9 -17 5.6 0.83
 0 -9 -17 6.62 0.5
 0 9 -17 6.7 1.05
 1 9 -17 6.38 0.97
 1 9 -17 5.75 0.96
 -1 -9 -17 4.09 0.43
 -1 -9 -17 4.22 0.4
 1 -9 -17 4.48 0.51
 -1 9 -17 4.31 0.76
 -1 9 -17 4.89 0.85
 -2 -9 -17 1.75 0.31
 -2 -9 -17 1.79 0.3
 2 9 -17 1.23 0.58
 -2 9 -17 2.16 0.66
 -2 9 -17 2.76 0.69
 3 9 -17 3.45 0.82
 -3 -9 -17 3.58 0.48
 -3 9 -17 3.95 0.76
 -3 9 -17 3.75 0.79
 0 10 -17 0.5 0.38
 0 -10 -17 1.01 0.22
 0 10 -17 0.91 0.49
 0 -10 -17 0.79 0.23
 1 10 -17 4.53 0.77
 -1 -10 -17 5.47 0.39
 -1 -10 -17 4.83 0.38
 1 10 -17 3.14 0.78
 -1 10 -17 4.86 0.84
 -1 10 -17 4.73 0.88
 1 -10 -17 4.4 0.49
 -2 -10 -17 4.06 0.4
 -2 -10 -17 3.37 0.38
 2 10 -17 4.48 0.91
 -2 10 -17 4.01 0.81
 -2 10 -17 3.57 0.77
 3 10 -17 3.06 0.86
 -3 -10 -17 3.88 0.46
 -3 -10 -17 3.34 0.4
 -3 10 -17 2.9 0.71
 -3 10 -17 4.02 0.83
 0 11 -17 0.85 0.43
 0 -11 -17 0.58 0.17
 0 11 -17 0.07 0.41
 0 -11 -17 0.71 0.17
 -1 -11 -17 5.25 0.32
 1 11 -17 5.5 0.98
 1 11 -17 8.95 1.18
 -1 -11 -17 5.33 0.32
 1 -11 -17 5.67 0.45
 -1 11 -17 4.99 0.81
 -1 11 -17 4.73 0.89
 -2 -11 -17 1.45 0.23
 2 11 -17 2.41 0.78
 -2 -11 -17 1.48 0.21
 -2 11 -17 2.6 0.68
 -2 11 -17 0.74 0.53
 0 12 -17 10.71 1.39
 1 12 -17 2.87 0.82
 1 -12 -17 2.12 0.28
 1 -12 -17 2.89 0.34
 -1 12 -17 1.34 0.6
 0 0 18 5.59 0.75
 0 0 -18 4.74 0.75
 0 0 -18 5.53 0.71
 1 0 -18 -0.24 0.29
 -1 0 18 0.28 0.23
 -1 0 -18 0.03 0.26
 -1 0 -18 -0.52 0.21
 -2 0 -18 2 0.48
 -2 0 -18 1.62 0.46
 2 0 -18 1.92 0.6
 -3 0 -18 -0.18 0.26
 3 0 -18 -0.54 0.3
 -3 0 -18 -0.51 0.22
 4 0 -18 -0.31 0.35
 -4 0 -18 -0.17 0.29
 0 -1 -18 5.58 0.72
 0 1 -18 8.25 0.92
 0 -1 -18 4.95 0.75
 0 -1 18 7.05 0.87
 0 1 -18 5.62 0.84
 -1 -1 -18 5.86 0.79
 1 1 -18 4.89 0.8
 1 -1 18 5.46 0.77
 -1 -1 -18 5.7 0.71
 -1 1 -18 5.16 0.8
 1 -1 -18 5.5 0.84
 -1 -1 18 5.56 0.76
 -1 1 -18 4.32 0.65
 2 1 -18 1.57 0.55
 -2 -1 -18 0.54 0.34
 -2 -1 -18 1.15 0.41
 -2 -1 18 -0.16 0.26
 -2 1 -18 0.65 0.39
 2 -1 -18 0.69 0.46
 -2 1 -18 0.53 0.34
 3 1 -18 5.58 0.94
 -3 -1 -18 4.97 0.71
 -3 1 -18 6.3 0.83
 -3 1 -18 5.16 0.79
 3 -1 -18 5.26 0.88
 4 1 -18 11.93 1.41
 -4 -1 -18 11 1
 4 -1 -18 11.64 1.41
 -4 1 -18 11.06 1.05
 0 2 -18 1.77 0.48
 0 -2 -18 2.66 0.49
 0 2 -18 2.89 0.63
 0 -2 -18 2.34 0.52
 0 -2 18 2.46 0.54
 1 -2 18 2.85 0.61
 -1 -2 -18 3.81 0.63
 -1 -2 -18 2.79 0.52
 1 2 -18 1.88 0.59
 -1 -2 18 2.03 0.54
 1 -2 -18 2.8 0.61
 -1 2 -18 2.03 0.57
 -1 2 -18 2.75 0.57
 2 2 -18 4.32 0.85
 -2 -2 -18 4.08 0.6
 -2 2 -18 3.99 0.66
 2 -2 -18 4.07 0.73
 -2 -2 18 3.92 0.74
 -2 2 -18 3.67 0.7
 -3 -2 -18 2.84 0.54
 3 2 -18 1.89 0.68
 -3 2 -18 3.24 0.65
 3 -2 -18 1.6 0.53
 -3 2 -18 1.99 0.55
 -4 -2 -18 3.69 0.65
 4 2 -18 2.64 0.8
 -4 2 -18 2.89 0.69
 -4 2 -18 2.79 0.65
 0 -3 -18 0.08 0.31
 0 -3 18 0.55 0.34
 0 -3 -18 0.38 0.29
 0 3 -18 -0.08 0.27
 0 3 -18 0.29 0.32
 -1 -3 -18 0.56 0.31
 1 -3 18 0.82 0.4
 1 3 -18 -0.32 0.36
 -1 -3 18 0.09 0.28
 1 -3 -18 0.58 0.38
 -1 3 -18 1.02 0.43
 -1 3 -18 0.25 0.36
 -2 -3 -18 3.35 0.55
 2 3 -18 4.32 0.82
 2 -3 18 3.8 0.72
 2 -3 -18 4.55 0.77
 -2 3 -18 4.59 0.73
 -2 3 -18 3.16 0.69
 -3 -3 -18 9.71 0.84
 3 3 -18 8.81 1.17
 -3 3 -18 10.31 1.21
 -3 3 -18 8.64 1.03
 4 3 -18 0.71 0.45
 -4 -3 -18 0.87 0.39
 -4 3 -18 0.24 0.39
 -4 3 -18 0.73 0.46
 0 -4 -18 2.21 0.43
 0 4 -18 2.65 0.64
 0 -4 -18 3.26 0.52
 0 4 -18 2.44 0.54
 -1 -4 -18 5.93 0.66
 1 4 -18 6.33 0.97
 -1 -4 -18 5.07 0.64
 -1 4 -18 5.74 0.85
 -1 4 -18 5.61 0.78
 -2 -4 -18 1.06 0.35
 2 4 -18 1.23 0.58
 -2 4 -18 1.61 0.53
 -2 4 -18 1.17 0.46
 -3 -4 -18 2.47 0.5
 3 4 -18 1.91 0.69
 -3 4 -18 2.06 0.6
 -3 4 -18 1.64 0.54
 4 4 -18 3.02 0.77
 -4 -4 -18 2.14 0.51
 -4 4 -18 2.56 0.67
 -4 4 -18 2.88 0.72
 0 5 -18 0.77 0.4
 0 -5 -18 0.75 0.31
 0 -5 -18 0.27 0.25
 0 5 -18 0.68 0.45
 -1 -5 -18 3.61 0.51
 -1 -5 -18 4.74 0.57
 1 5 -18 3.67 0.74
 -1 5 -18 4.76 0.76
 -1 5 -18 4.15 0.8
 -2 -5 -18 0.79 0.29
 2 5 -18 0.82 0.54
 -2 5 -18 1.34 0.5
 -2 5 -18 0.69 0.46
 3 5 -18 0.44 0.4
 -3 -5 -18 1.34 0.42
 -3 5 -18 0.81 0.45
 -3 5 -18 0.39 0.41
 -4 -5 -18 0.08 0.31
 4 5 -18 1.19 0.58
 -4 5 -18 0.39 0.43
 -4 5 -18 0.54 0.45
 0 6 -18 0.61 0.42
 0 6 -18 0 0.29
 0 -6 -18 0.35 0.26
 0 -6 -18 0.19 0.23
 -1 -6 -18 3.34 0.48
 1 6 -18 3.48 0.73
 -1 -6 -18 2.9 0.46
 -1 6 -18 4.14 0.7
 -1 6 -18 3.24 0.72
 -2 -6 -18 2.68 0.45
 2 6 -18 1.44 0.58
 -2 6 -18 3.29 0.72
 -2 6 -18 1.99 0.62
 -3 -6 -18 2.82 0.48
 3 6 -18 3.58 0.84
 -3 6 -18 3.37 0.72
 -3 6 -18 4.3 0.81
 0 -7 -18 0.6 0.25
 0 -7 -18 0.31 0.22
 0 7 -18 0.36 0.4
 0 7 -18 0.43 0.33
 -1 -7 -18 2.7 0.41
 1 7 -18 2.02 0.59
 1 7 -18 2 0.67
 -1 -7 -18 2.55 0.41
 -1 7 -18 3.33 0.74
 -1 7 -18 3.22 0.68
 -2 -7 -18 7.57 0.63
 2 7 -18 6.15 1.08
 -2 7 -18 5.73 0.91
 -2 7 -18 7.3 1
 3 7 -18 14.37 1.36
 -3 -7 -18 14.37 0.91
 -3 7 -18 15.49 1.27
 -3 7 -18 12.59 1.21
 0 8 -18 5.82 0.99
 0 8 -18 7.18 0.99
 0 -8 -18 4.59 0.53
 0 -8 -18 5.13 0.54
 -1 -8 -18 10.74 0.68
 1 8 -18 12.87 1.15
 1 8 -18 13.24 1.46
 -1 -8 -18 10.36 0.68
 1 -8 -18 9.61 0.74
 -1 8 -18 13.11 1.12
 -1 8 -18 12.44 1.16
 -2 -8 -18 3.69 0.48
 2 8 -18 4.05 0.85
 -2 -8 -18 4.24 0.48
 -2 8 -18 3.59 0.77
 -2 8 -18 3.76 0.74
 -3 -8 -18 2.54 0.43
 3 8 -18 2.42 0.77
 -3 8 -18 3.23 0.81
 -3 8 -18 4 0.8
 0 -9 -18 6.11 0.51
 0 9 -18 6.13 0.91
 0 9 -18 7.06 1.07
 0 -9 -18 6.07 0.51
 1 9 -18 8.2 1.18
 -1 -9 -18 9.78 0.61
 -1 -9 -18 9.38 0.6
 1 9 -18 10.05 1.2
 -1 9 -18 9.29 1.09
 1 -9 -18 8.39 0.65
 -1 9 -18 11.16 1.32
 2 9 -18 1.59 0.64
 -2 -9 -18 3.17 0.41
 -2 -9 -18 2.96 0.41
 -2 9 -18 3.13 0.72
 -2 9 -18 2.01 0.63
 0 -10 -18 -0.08 0.14
 0 10 -18 0 0.38
 0 10 -18 -0.03 0.27
 0 -10 -18 0.2 0.18
 1 10 -18 1.87 0.6
 1 10 -18 1.87 0.68
 -1 -10 -18 2.34 0.32
 -1 -10 -18 1.95 0.31
 1 -10 -18 2.13 0.36
 -1 10 -18 2.74 0.67
 -1 10 -18 2.31 0.71
 -2 -10 -18 1.75 0.3
 2 10 -18 1.41 0.61
 -2 -10 -18 1.57 0.28
 -2 10 -18 2.37 0.64
 -2 10 -18 1.63 0.66
 0 -11 -18 0.94 0.2
 0 11 -18 0.75 0.51
 0 -11 -18 0.75 0.2
 1 11 -18 2.24 0.7
 -1 -11 -18 2.6 0.28
 -1 -11 -18 1.73 0.23
 -1 11 -18 1.67 0.69
 1 -11 -18 1.82 0.31
 1 -11 -18 1.83 0.33
 -1 0 -19 -0.22 0.27
 1 0 -19 -0.49 0.27
 -1 0 -19 0.36 0.36
 -2 0 -19 0.3 0.32
 2 0 -19 -0.19 0.33
 -2 0 -19 0.04 0.26
 -3 0 -19 0.22 0.36
 3 0 -19 -0.12 0.4
 0 -1 -19 0.15 0.32
 0 1 -19 -0.1 0.25
 0 -1 -19 -0.19 0.24
 0 1 -19 -0.23 0.28
 1 1 -19 1.37 0.49
 -1 -1 -19 1.67 0.47
 -1 -1 -19 1.67 0.52
 1 -1 -19 1.48 0.49
 -1 1 -19 0.77 0.38
 -1 1 -19 1.11 0.49
 -2 -1 -19 0.56 0.35
 2 1 -19 0.98 0.49
 2 -1 -19 0.14 0.37
 -2 1 -19 -0.14 0.3
 -2 1 -19 0.89 0.4
 3 1 -19 1.3 0.56
 -3 -1 -19 2.45 0.53
 3 -1 -19 2.16 0.74
 -3 1 -19 3.17 0.65
 0 2 -19 0.58 0.38
 0 -2 -19 0.54 0.33
 0 2 -19 0.92 0.44
 1 2 -19 2.31 0.63
 -1 -2 -19 2.13 0.46
 -1 2 -19 2.11 0.56
 -1 2 -19 2.26 0.55
 -2 -2 -19 0.81 0.36
 2 2 -19 0.81 0.53
 -2 2 -19 0.82 0.45
 -2 2 -19 1.28 0.47
 -3 -2 -19 8.32 0.93
 3 2 -19 7.4 1.12
 -3 2 -19 7.18 0.99
 -3 2 -19 7.48 0.99
 0 3 -19 1.88 0.58
 0 -3 -19 1.62 0.42
 0 3 -19 1.46 0.45
 -1 -3 -19 0.42 0.3
 1 3 -19 0.64 0.46
 -1 3 -19 1.14 0.45
 -1 3 -19 0.53 0.4
 -2 -3 -19 1.06 0.39
 2 3 -19 1.63 0.61
 -2 3 -19 0.76 0.45
 -2 3 -19 1.18 0.5
 -3 -3 -19 1.41 0.44
 3 3 -19 2.18 0.62
 -3 3 -19 2.97 0.67
 -3 3 -19 2.24 0.65
 0 -4 -19 0.43 0.29
 0 4 -19 0.14 0.35
 0 4 -19 0.64 0.41
 -1 -4 -19 6.51 0.72
 1 4 -19 5.46 0.95
 -1 4 -19 5.73 0.81
 -1 4 -19 5.93 0.88
 -2 -4 -19 4.07 0.6
 2 4 -19 3.84 0.85
 -2 4 -19 4.63 0.88
 -2 4 -19 3.84 0.73
 3 4 -19 4.43 0.96
 -3 -4 -19 3.76 0.63
 -3 4 -19 4.56 0.84
 -3 4 -19 3.82 0.74
 0 -5 -19 0.45 0.29
 0 5 -19 0.35 0.37
 0 5 -19 -0.47 0.24
 -1 -5 -19 12.11 0.84
 1 5 -19 10.84 1.27
 -1 5 -19 12.43 1.07
 -1 5 -19 11.14 1.28
 -2 -5 -19 15.92 1
 2 5 -19 14.46 1.35
 -2 5 -19 14.42 1.26
 -2 5 -19 16.55 1.26
 3 5 -19 3.57 0.84
 -3 -5 -19 3.46 0.6
 -3 5 -19 2.85 0.73
 -3 5 -19 2.18 0.63
 0 6 -19 0.61 0.45
 0 6 -19 0.37 0.35
 0 -6 -19 0.56 0.25
 -1 -6 -19 5.26 0.61
 1 6 -19 4.41 0.86
 1 6 -19 5.18 0.9
 -1 6 -19 4.8 0.79
 -1 6 -19 4.78 0.89
 -2 -6 -19 0.71 0.31
 2 6 -19 0.34 0.42
 -2 6 -19 0.64 0.47
 -2 6 -19 -0.02 0.36
 -3 -6 -19 5.77 0.7
 3 6 -19 5.65 1.08
 -3 6 -19 7.1 1.05
 -3 6 -19 6.18 0.99
 0 -7 -19 0.07 0.22
 0 7 -19 -0.52 0.28
 0 7 -19 0.18 0.35
 1 7 -19 1.81 0.61
 1 7 -19 2.19 0.62
 -1 -7 -19 2.31 0.42
 -1 7 -19 2.27 0.66
 -1 7 -19 2.4 0.62
 -2 -7 -19 10.6 0.78
 2 7 -19 11.14 1.39
 -2 7 -19 9.96 1.14
 -2 7 -19 11.46 1.38
 0 8 -19 6.74 1.02
 0 -8 -19 6.46 0.58
 0 8 -19 6.69 0.92
 1 8 -19 15.34 1.39
 1 8 -19 14.92 1.26
 -1 -8 -19 15.18 0.86
 -1 8 -19 15.76 1.33
 -1 8 -19 15.01 1.2
 2 8 -19 2.56 0.77
 -2 -8 -19 3.83 0.51
 -2 8 -19 3.38 0.77
 -2 8 -19 3.18 0.79
 0 9 -19 0.79 0.46
 0 -9 -19 0.41 0.24
 0 9 -19 0.31 0.4
 0 -9 -19 0.42 0.25
 -1 -9 -19 9.59 0.63
 1 9 -19 7.47 1.15
 -1 -9 -19 9.38 0.63
 1 9 -19 8.17 1.1
 -1 9 -19 8.39 1.2
 -1 9 -19 9.59 1.17
 0 10 -19 1.12 0.54
 0 -10 -19 1.94 0.32
 0 -10 -19 1.57 0.31
 0 10 -19 2.12 0.68
 0 0 -20 4.22 0.65
 1 0 -20 0.28 0.37
 -1 0 -20 -0.16 0.26
 -2 0 -20 -0.11 0.33
 -3 0 -20 0.83 0.43
 0 -1 -20 1.06 0.4
 0 1 -20 0.44 0.34
 0 1 -20 0.36 0.41
 1 1 -20 2.38 0.66
 -1 -1 -20 2.9 0.57
 -1 1 -20 1.98 0.54
 -1 1 -20 3.28 0.62
 2 1 -20 0.11 0.39
 -2 -1 -20 0.43 0.37
 -2 1 -20 1.75 0.52
 -3 -1 -20 1.74 0.5
 3 1 -20 1.39 0.58
 -3 1 -20 1.56 0.52
 0 -2 -20 0.6 0.36
 0 2 -20 0.48 0.46
 0 2 -20 0.49 0.38
 -1 -2 -20 2.77 0.54
 1 2 -20 3.05 0.7
 -1 2 -20 2.19 0.62
 -1 2 -20 2.97 0.61
 -2 -2 -20 1.62 0.48
 2 2 -20 0.35 0.42
 -2 2 -20 1.08 0.48
 -2 2 -20 0.89 0.41
 3 2 -20 4.11 0.9
 -3 -2 -20 3.51 0.65
 -3 2 -20 4.8 0.84
 0 -3 -20 10.15 0.84
 0 3 -20 7.61 1.04
 0 3 -20 8.49 0.98
 1 3 -20 4.98 0.88
 -1 -3 -20 6.13 0.76
 -1 3 -20 4.85 0.83
 -1 3 -20 4.03 0.75
 -2 -3 -20 1.01 0.4
 2 3 -20 1.86 0.66
 -2 3 -20 0.93 0.45
 -2 3 -20 1.94 0.64
 -3 -3 -20 0.47 0.35
 3 3 -20 0.8 0.59
 -3 3 -20 1.08 0.48
 0 4 -20 1.49 0.56
 0 -4 -20 0.99 0.35
 0 4 -20 0.84 0.43
 1 4 -20 2.58 0.69
 1 4 -20 3.73 0.75
 -1 -4 -20 3.34 0.57
 -1 4 -20 2.57 0.72
 -1 4 -20 1.96 0.57
 -2 -4 -20 1.94 0.48
 2 4 -20 1.97 0.7
 -2 4 -20 1.93 0.64
 -2 4 -20 1.74 0.54
 0 5 -20 3.14 0.75
 0 5 -20 2.48 0.6
 0 -5 -20 2.61 0.49
 1 5 -20 15.48 1.28
 1 5 -20 14.98 1.32
 -1 -5 -20 14.4 0.97
 -1 5 -20 16.51 1.32
 -1 5 -20 15.16 1.22
 2 5 -20 3.31 0.83
 -2 -5 -20 1.97 0.44
 -2 5 -20 1.57 0.58
 -2 5 -20 2.67 0.73
 0 -6 -20 1.29 0.37
 0 6 -20 0.27 0.41
 0 6 -20 0.55 0.47
 1 6 -20 12.44 1.16
 -1 -6 -20 12.48 0.86
 1 6 -20 12.15 1.46
 -1 6 -20 11.84 1.1
 -1 6 -20 13.59 1.48
 2 6 -20 0.21 0.39
 -2 -6 -20 0.18 0.26
 -2 6 -20 0.54 0.47
 -2 6 -20 0.18 0.41
 0 7 -20 5.21 0.85
 0 -7 -20 3 0.49
 0 7 -20 5.82 1.02
 1 7 -20 1.83 0.61
 -1 -7 -20 1.42 0.37
 1 7 -20 1.23 0.61
 -1 7 -20 1.93 0.67
 -1 7 -20 1.75 0.55
 0 8 -20 2.66 0.66
 -1 0 -21 3.62 0.65
 -2 0 -21 5.26 0.81
 0 1 -21 5.8 0.82
 0 -1 -21 4.39 0.69
 -1 -1 -21 1.01 0.42
 1 1 -21 1.49 0.5
 -1 1 -21 0.47 0.41
 -2 -1 -21 -0.15 0.28
 -2 1 -21 0.72 0.43
 0 2 -21 7.18 0.91
 0 -2 -21 8.88 0.96
 1 2 -21 2.56 0.72
 1 2 -21 4.14 0.75
 -1 -2 -21 4.03 0.68
 -1 2 -21 2.25 0.61
 -2 -2 -21 3.15 0.59
 2 2 -21 2.14 0.75
 -2 2 -21 1.32 0.51
 0 3 -21 25.27 1.55
 0 3 -21 26.18 1.74
 0 -3 -21 26.85 1.42
 1 3 -21 2.18 0.63
 1 3 -21 1.53 0.55
 -1 -3 -21 2.92 0.57
 -1 3 -21 2.86 0.71
 -1 3 -21 2.51 0.66
 0 4 -21 4.76 0.89
 0 -4 -21 8.75 0.8
 0 4 -21 7.07 0.97
 1 4 -21 5.02 0.85
 1 4 -21 4.67 0.88
 -1 -4 -21 6.23 0.75
 -1 4 -21 5.88 1.01
 -1 4 -21 5.7 0.89
 0 -5 -21 7.13 0.8
 0 5 -21 5.57 0.88
 0 5 -21 6.32 1
 1 5 -21 9.88 1.32
 1 5 -21 7.38 1.06
 -1 -5 -21 8.5 0.85
 -1 5 -21 6.87 0.97
 -1 5 -21 6.77 1.01
